# Supplementary material for: The PD-1/PD-L1 Pathway Affects the Expansion and Function of Cytotoxic CD8+ T Cells During an Acute Retroviral Infection
Source: Front Immunol. 2019 Feb 5;10:54. doi: 10.3389/fimmu.2019.00054 (PMC6370637; doi:10.3389/fimmu.2019.00054)
Supplement: Supplementary file 1 [file Table_1.xlsx]

## Sheet: Data
Table1									Normalized abundance								Raw abundance								Spectral counts
									wild type				PD-L1-KO				wild type				PD-L1-KO				wild type				PD-L1-KO
Accession	Peptide count	Unique peptides	Confidence score	Anova (p)	Max fold change	Highest mean condition	Lowest mean condition	Description	QEXI12420	QEXI12422	QEXI12424	QEXI12426	QEXI12428	QEXI12430	QEXI12434	QEXI12436	QEXI12420	QEXI12422	QEXI12424	QEXI12426	QEXI12428	QEXI12430	QEXI12434	QEXI12436	QEXI12420	QEXI12422	QEXI12424	QEXI12426	QEXI12428	QEXI12430	QEXI12434	QEXI12436
Q9JJZ6	1	1	86.48	0.000962741	1.36646	PD-L1-KO	wild type	Krueppel-like factor 13 OS=Mus musculus GN=Klf13 PE=2 SV=2 - [KLF13_MOUSE]	27556.1	30024	28064.2	23924.5	36100.2	39354.1	38231	36036.3	55205.7	24585.3	32652	34127.9	58296.7	60064.4	38231	50483.3	1	1	1	1	1	1	1	1
Q75N62	4	4	160.46	0.00189953	1.6696	wild type	PD-L1-KO	GTPase IMAP family member 8 OS=Mus musculus GN=Gimap8 PE=2 SV=1 - [GIMA8_MOUSE]	271482	267903	280190	216345	170943	122313	157638	169566	543885	219374	325994	308613	276049	186680	157638	237545	2	2	2	3	2	0	2	2
Q69ZK0	9	9	467.1	0.00474385	1.90797	wild type	PD-L1-KO	Phosphatidylinositol 3,4,5-trisphosphate-dependent Rac exchanger 1 protein OS=Mus musculus GN=Prex1 PE=1 SV=2 - [PREX1_MOUSE]	240634	206474	188467	142749	107410	75668.3	118510	106345	482085	169072	219277	203629	173452	115489	118510	148979	2	1	5	2	2	0	2	1
P47911	7	6	419.94	0.00771369	1.53847	wild type	PD-L1-KO	60S ribosomal protein L6 OS=Mus musculus GN=Rpl6 PE=1 SV=3 - [RL6_MOUSE]	711477	542112	586950	827123	439015	377914	439783	477259	1.42537e+06	443911	682902	1.17988e+06	708946	576792	439783	668592	6	3	3	1	3	3	3	3
Q3UN02	2	2	146.38	0.00810836	1.60661	wild type	PD-L1-KO	Lysocardiolipin acyltransferase 1 OS=Mus musculus GN=Lclat1 PE=2 SV=2 - [LCLT1_MOUSE]	106809	124223	90346.3	111523	73829.1	84511.9	56677	54431.9	213980	101720	105116	159087	119224	128987	56677	76253.6	2	2	2	0	2	0	0	1
Q9QZE5	10	9	349.89	0.0108041	1.3677	wild type	PD-L1-KO	Coatomer subunit gamma-1 OS=Mus musculus GN=Copg1 PE=2 SV=1 - [COPG1_MOUSE]	397679	393707	475459	363102	316701	334595	292117	248326	796708	322389	553185	517960	511427	510677	292117	347880	4	1	5	2	3	2	2	2
P50446	18	4	994.26	0.0116355	4.20364	wild type	PD-L1-KO	Keratin, type II cytoskeletal 6A OS=Mus musculus GN=Krt6a PE=2 SV=3 - [K2C6A_MOUSE]	761475	265994	674221	241563	57488.7	156379	157848	90562.8	1.52553e+06	217811	784440	344587	92836.1	238674	157848	126869	3	1	4	2	1	1	1	1
Q3UIR3	8	8	313.51	0.0123512	1.71363	wild type	PD-L1-KO	E3 ubiquitin-protein ligase DTX3L OS=Mus musculus GN=Dtx3l PE=2 SV=1 - [DTX3L_MOUSE]	228580	253710	166660	140304	103934	127244	121730	107667	457935	207752	193904	200142	167838	194206	121730	150831	0	1	3	2	2	0	0	2
P62307	1	1	57.78	0.0139315	1.47511	PD-L1-KO	wild type	Small nuclear ribonucleoprotein F OS=Mus musculus GN=Snrpf PE=2 SV=1 - [RUXF_MOUSE]	116760	137880	91761.7	85999.9	142529	161179	157602	176530	233915	112904	106762	122678	230164	246000	157602	247301	2	1	0	1	0	1	1	0
Q61703	4	4	201.52	0.0148487	7.44383	wild type	PD-L1-KO	Inter-alpha-trypsin inhibitor heavy chain H2 OS=Mus musculus GN=Itih2 PE=1 SV=1 - [ITIH2_MOUSE]	178169	99637.8	218110	761617	24794.4	105303	17316.8	21521.8	356942	81588.9	253766	1.08644e+06	40039.5	160720	17316.8	30149.9	1	0	1	4	0	0	0	0
P70315	9	9	369.71	0.014913	1.24736	wild type	PD-L1-KO	Wiskott-Aldrich syndrome protein homolog OS=Mus musculus GN=Was PE=1 SV=1 - [WASP_MOUSE]	1.10933e+06	968522	1.01485e+06	954210	689423	880852	874519	799591	2.22242e+06	793080	1.18075e+06	1.36117e+06	1.11332e+06	1.3444e+06	874519	1.12015e+06	4	2	6	8	5	4	5	7
P04919	7	7	279.18	0.0154259	3.92306	wild type	PD-L1-KO	Band 3 anion transport protein OS=Mus musculus GN=Slc4a1 PE=1 SV=1 - [B3AT_MOUSE]	368890	541769	541384	166165	109789	37555.9	137047	128094	739032	443630	629887	237032	177294	57319.9	137047	179447	1	4	6	1	2	0	2	2
O08677	2	2	53.28	0.0162559	19.2868	wild type	PD-L1-KO	Kininogen-1 OS=Mus musculus GN=Kng1 PE=1 SV=1 - [KNG1_MOUSE]	5302.49	15286.5	14123.5	125772	1509.95	3247.91	2151.13	1411.93	10623	12517.4	16432.4	179412	2438.36	4957.14	2151.13	1977.97	0	0	0	2	0	0	0	0
Q8C5L3	1	1	58.38	0.0168401	4.4033	wild type	PD-L1-KO	CCR4-NOT transcription complex subunit 2 OS=Mus musculus GN=Cnot2 PE=2 SV=2 - [CNOT2_MOUSE]	114866	104439	130755	87699.9	8288.52	11251.8	76412.7	3463.3	230122	85520.2	152130	125103	13384.8	17173	76412.7	4851.74	1	0	1	0	0	0	1	0
Q505F5	9	9	366.02	0.0174288	1.51007	wild type	PD-L1-KO	Leucine-rich repeat-containing protein 47 OS=Mus musculus GN=Lrrc47 PE=1 SV=1 - [LRC47_MOUSE]	153429	156049	127261	98203	100520	80709.7	94432.7	78588.1	307379	127781	148065	140085	162326	123183	94432.7	110094	1	2	1	2	3	2	1	0
B2RUP2	1	1	64.4	0.0187683	1.54861	wild type	PD-L1-KO	Protein unc-13 homolog D OS=Mus musculus GN=Unc13d PE=1 SV=2 - [UN13D_MOUSE]	25710.5	21541.1	24542	19941.2	14050	20089.8	14509	10588	51508.3	17639	28554.1	28445.9	22688.7	30662.1	14509	14832.7	1	0	1	0	1	1	0	0
Q3UW53	11	11	491.04	0.0189369	1.36685	wild type	PD-L1-KO	Protein Niban OS=Mus musculus GN=Fam129a PE=1 SV=2 - [NIBAN_MOUSE]	649443	613650	562909	476852	408230	437246	491015	348292	1.30109e+06	502490	654930	680223	659234	667348	491015	487922	2	1	7	3	6	2	3	3
Q9JI78	1	1	65.67	0.019367	1.49352	wild type	PD-L1-KO	Peptide-N(4)-(N-acetyl-beta-glucosaminyl)asparagine amidase OS=Mus musculus GN=Ngly1 PE=1 SV=2 - [NGLY1_MOUSE]	24080.4	31499	24784.7	28869	13857.9	22702.4	20676.1	15901.4	48242.4	25793.1	28836.4	41181.2	22378.5	34649.6	20676.1	22276.2	0	1	1	0	1	0	0	1
P00920	3	3	88.35	0.0197645	3.40897	wild type	PD-L1-KO	Carbonic anhydrase 2 OS=Mus musculus GN=Ca2 PE=1 SV=4 - [CAH2_MOUSE]	1.59449e+06	1.60147e+06	572518	663751	208613	186047	655545	249962	3.19439e+06	1.31137e+06	666111	946832	336880	283954	655545	350172	3	2	1	0	0	0	0	0
Q9D0D5	1	1	59.08	0.019972	178.005	PD-L1-KO	wild type	General transcription factor IIE subunit 1 OS=Mus musculus GN=Gtf2e1 PE=2 SV=1 - [T2EA_MOUSE]	0	21.9801	0	4.12817	3251.82	564.645	7.74553	823.19	0	17.9985	0	5.88878	5251.23	861.791	7.74553	1153.21	0	0	0	0	1	0	0	0
Q9D517	4	2	159.44	0.020464	1.33988	wild type	PD-L1-KO	1-acyl-sn-glycerol-3-phosphate acyltransferase gamma OS=Mus musculus GN=Agpat3 PE=1 SV=2 - [PLCC_MOUSE]	98771.8	90937.4	99680.2	106289	65729.8	60267.3	90962.3	78350.9	197879	74464.6	115975	151620	106144	91983.2	90962.3	109762	1	1	1	0	1	0	0	1
Q8BL66	9	7	476.29	0.0226081	1.74026	wild type	PD-L1-KO	Early endosome antigen 1 OS=Mus musculus GN=Eea1 PE=1 SV=2 - [EEA1_MOUSE]	140954	142156	89601.4	138079	70513	106031	51504	65465.7	282387	116405	104249	196968	113869	161831	51504	91710.9	1	2	2	3	1	3	1	2
Q09200	18	18	727.01	0.0248699	1.2682	wild type	PD-L1-KO	Beta-1,4 N-acetylgalactosaminyltransferase 1 OS=Mus musculus GN=B4galnt1 PE=2 SV=1 - [B4GN1_MOUSE]	1.52096e+06	1.50413e+06	1.23941e+06	1.16823e+06	962848	1.16674e+06	1.10245e+06	1.05179e+06	3.04708e+06	1.23167e+06	1.44202e+06	1.66646e+06	1.55486e+06	1.78074e+06	1.10245e+06	1.47346e+06	6	3	7	5	5	2	7	2
Q8BP67	6	6	304.96	0.025119	1.35374	wild type	PD-L1-KO	60S ribosomal protein L24 OS=Mus musculus GN=Rpl24 PE=2 SV=2 - [RL24_MOUSE]	583266	477307	468197	704876	407385	431021	399921	411651	1.16851e+06	390845	544735	1.0055e+06	657868	657848	399921	576682	5	4	4	2	5	4	3	2
Q99K85	4	4	133.47	0.0251788	1.30857	wild type	PD-L1-KO	Phosphoserine aminotransferase OS=Mus musculus GN=Psat1 PE=1 SV=1 - [SERC_MOUSE]	94778.2	75920.4	78537.3	70564	52031.4	57331.1	69814.3	65211.8	189878	62167.8	91376.2	100659	84023.3	87501.8	69814.3	91355.2	2	1	3	0	3	0	0	0
Q9CXR1	1	1	38.43	0.0253266	3.15508	wild type	PD-L1-KO	Dehydrogenase/reductase SDR family member 7 OS=Mus musculus GN=Dhrs7 PE=2 SV=2 - [DHRS7_MOUSE]	48357.8	44001.1	41864.1	17999.1	4170.52	18133.3	17923.5	8019.35	96879.5	36030.6	48707.8	25675.5	6734.79	27676	17923.5	11234.3	1	1	1	0	0	0	0	0
Q8BYY4	2	2	103.29	0.0256093	1.56426	wild type	PD-L1-KO	Tetratricopeptide repeat protein 39B OS=Mus musculus GN=Ttc39b PE=1 SV=1 - [TT39B_MOUSE]	90141.9	70595.3	79205.5	126074	63493.1	46416.8	62964.1	61112.3	180590	57807.3	92153.6	179843	102532	70843.7	62964.1	85612.2	0	1	1	0	0	0	1	0
Q02357	2	2	67.48	0.0259641	9.58103	wild type	PD-L1-KO	Ankyrin-1 OS=Mus musculus GN=Ank1 PE=1 SV=2 - [ANK1_MOUSE]	15556.3	20278.2	9506.52	1377.62	541.178	766.566	3196.33	372.092	31165.4	16604.9	11060.6	1965.16	873.925	1169.97	3196.33	521.264	1	1	0	0	0	0	0	0
Q8BRT1	1	1	73.01	0.0262321	5.22598	wild type	PD-L1-KO	CLIP-associating protein 2 OS=Mus musculus GN=Clasp2 PE=1 SV=1 - [CLAP2_MOUSE]	4811.86	2073.33	7045.6	2615.2	6.0721	3157.06	2.97727	0	9640.04	1697.76	8197.38	3730.55	9.80559	4818.46	2.97727	0	0	0	0	0	0	1	0	0
Q91YR7	6	6	347.21	0.0262564	1.15861	PD-L1-KO	wild type	Pre-mRNA-processing factor 6 OS=Mus musculus GN=Prpf6 PE=2 SV=1 - [PRP6_MOUSE]	189808	210382	179491	216349	246908	230133	227414	217833	380260	172272	208834	308619	398722	351241	227414	305162	2	3	5	2	5	1	3	4
P52875	5	5	258.57	0.0270038	1.27901	wild type	PD-L1-KO	Transmembrane protein 165 OS=Mus musculus GN=Tmem165 PE=2 SV=2 - [TM165_MOUSE]	224778	207370	171242	193079	137813	182953	144376	157581	450318	169806	199236	275425	222548	279232	144376	220756	2	1	1	1	1	0	2	1
Q3TDQ1	2	1	92.62	0.02706	1.60733	wild type	PD-L1-KO	Dolichyl-diphosphooligosaccharide--protein glycosyltransferase subunit STT3B OS=Mus musculus GN=Stt3b PE=1 SV=2 - [STT3B_MOUSE]	40120.4	35994.4	43643.3	33014.8	25905.5	29815.2	25061.5	14265.6	80376.9	29474.2	50777.9	47095.2	41833.8	45505.5	25061.5	19984.6	1	1	1	1	1	1	1	0
Q9Z1W9	3	3	187.27	0.0270785	2.28975	wild type	PD-L1-KO	STE20/SPS1-related proline-alanine-rich protein kinase OS=Mus musculus GN=Stk39 PE=1 SV=1 - [STK39_MOUSE]	251166	211265	239470	117593	117838	41445.8	108650	89963.5	503185	172995	278618	167745	190292	63256.8	108650	126030	2	2	3	2	2	1	1	1
Q9R0G6	1	1	30.6	0.0281822	33.2201	wild type	PD-L1-KO	Cartilage oligomeric matrix protein OS=Mus musculus GN=Comp PE=1 SV=2 - [COMP_MOUSE]	6453.65	526.617	6363	39745.7	1553.62	44.4628	0	0.02036	12929.2	431.223	7403.2	56696.8	2508.87	67.8615	0	0.0285224	0	0	0	1	0	0	0	0
Q9CXY9	4	4	239.99	0.0283887	1.45028	wild type	PD-L1-KO	GPI-anchor transamidase OS=Mus musculus GN=Pigk PE=2 SV=2 - [GPI8_MOUSE]	160090	174846	122681	164217	129413	123689	84970	90697	320722	143174	142736	234254	208984	188781	84970	127057	2	1	3	1	3	1	1	2
Q99N50	4	4	124.49	0.0302757	2.04835	wild type	PD-L1-KO	Synaptotagmin-like protein 2 OS=Mus musculus GN=Sytl2 PE=1 SV=2 - [SYTL2_MOUSE]	85940.2	59436.1	72296.1	48113.6	16183.3	24888.6	41586.6	47097.6	172172	48669.6	84114.8	68633.5	26133.7	37986.3	41586.6	65979.1	0	0	3	2	2	0	0	2
P49442	4	3	251.23	0.0324116	1.71348	wild type	PD-L1-KO	Inositol polyphosphate 1-phosphatase OS=Mus musculus GN=Inpp1 PE=1 SV=2 - [INPP_MOUSE]	213074	266252	224255	227881	195501	165767	77909.9	104430	426872	218022	260915	325070	315706	253002	77909.9	146296	2	1	2	2	0	1	1	0
Q921G6	2	2	69.76	0.0324333	2.1597	wild type	PD-L1-KO	Leucine-rich repeat and calponin homology domain-containing protein 4 OS=Mus musculus GN=Lrch4 PE=2 SV=1 - [LRCH4_MOUSE]	32483.3	37616.2	39206	39464.4	6777.71	12013.8	33825.9	16267.2	65076.9	30802.3	45615.3	56295.5	10945	18336.2	33825.9	22788.7	0	1	2	0	1	1	1	1
P55772	3	3	134.52	0.0328206	1.54987	wild type	PD-L1-KO	Ectonucleoside triphosphate diphosphohydrolase 1 OS=Mus musculus GN=Entpd1 PE=2 SV=1 - [ENTP1_MOUSE]	98124.8	72765.8	73421.4	66796.4	41619.4	73484.5	47049.9	38578.1	196582	59584.7	85424.1	95284.1	67209.4	112156	47049.9	54044	0	1	1	0	1	0	0	0
P01942	20	20	890.68	0.0334335	3.66338	wild type	PD-L1-KO	Hemoglobin subunit alpha OS=Mus musculus GN=Hba PE=1 SV=2 - [HBA_MOUSE]	5.38636e+07	4.79995e+07	6.40011e+07	1.3622e+07	1.04069e+07	4.87846e+06	2.08613e+07	1.28481e+07	1.0791e+08	3.93047e+07	7.44637e+07	1.94316e+07	1.68056e+07	7.44576e+06	2.08613e+07	1.7999e+07	63	61	57	45	28	13	51	24
Q61093	4	4	213.93	0.0345155	2.12058	wild type	PD-L1-KO	Cytochrome b-245 heavy chain OS=Mus musculus GN=Cybb PE=2 SV=1 - [CY24B_MOUSE]	269814	246082	262629	206543	157923	53389.8	191573	61642.6	540544	201505	305562	294631	255022	81486.4	191573	86355.1	2	1	2	0	1	0	1	0
Q640M1	1	1	22.48	0.0359895	27.4919	PD-L1-KO	wild type	U3 small nucleolar RNA-associated protein 14 homolog A OS=Mus musculus GN=Utp14a PE=2 SV=1 - [UT14A_MOUSE]	11.1292	0	0	277.992	4192.18	109.717	137.53	3509.07	22.2962	0	0	396.553	6769.78	167.456	137.53	4915.85	0	0	0	0	0	0	0	1
Q07113	13	13	586.54	0.0365156	1.32885	wild type	PD-L1-KO	Cation-independent mannose-6-phosphate receptor OS=Mus musculus GN=Igf2r PE=1 SV=1 - [MPRI_MOUSE]	514888	644637	457020	505438	363675	473166	425657	334364	1.03152e+06	527864	531731	721001	587283	722171	425657	468410	3	1	4	3	8	2	5	4
Q91XA2	2	2	73.02	0.0377343	1.22685	PD-L1-KO	wild type	Golgi membrane protein 1 OS=Mus musculus GN=Golm1 PE=1 SV=2 - [GOLM1_MOUSE]	22133.4	20116.6	21687.4	21711.5	21745.4	26657.8	30782.1	25893.4	44341.8	16472.6	25232.8	30971.1	35115.7	40686.6	30782.1	36274.1	1	0	1	0	1	1	1	1
O08810	28	26	1520.34	0.0379363	1.8544	wild type	PD-L1-KO	116 kDa U5 small nuclear ribonucleoprotein component OS=Mus musculus GN=Eftud2 PE=2 SV=1 - [U5S1_MOUSE]	4.94833e+06	2.36066e+06	4.08402e+06	5.07712e+06	2.58128e+06	1.81316e+06	2.90113e+06	1.58608e+06	9.91344e+06	1.93304e+06	4.75166e+06	7.24245e+06	4.1684e+06	2.76734e+06	2.90113e+06	2.22193e+06	13	10	12	12	18	9	12	9
P70677	14	14	588.98	0.0389789	1.50188	wild type	PD-L1-KO	Caspase-3 OS=Mus musculus GN=Casp3 PE=1 SV=1 - [CASP3_MOUSE]	1.23763e+06	1.18967e+06	1.14955e+06	859182	820025	920018	725307	488298	2.47947e+06	974169	1.33747e+06	1.22561e+06	1.32422e+06	1.40418e+06	725307	684056	9	6	8	5	4	4	5	1
Q8R1Z9	1	1	40.9	0.0396362	6.76512	wild type	PD-L1-KO	RING finger protein 121 OS=Mus musculus GN=Rnf121 PE=2 SV=1 - [RN121_MOUSE]	15706.8	11244.4	20507.6	1641.22	428.07	5039.37	707.659	1082.72	31466.9	9207.57	23860.1	2341.18	691.272	7691.35	707.659	1516.79	1	0	0	0	0	0	0	0
Q62418	17	15	609.44	0.0407531	1.40877	wild type	PD-L1-KO	Drebrin-like protein OS=Mus musculus GN=Dbnl PE=1 SV=2 - [DBNL_MOUSE]	2.40479e+06	2.48742e+06	1.93244e+06	2.08211e+06	1.79398e+06	2.03266e+06	1.23477e+06	1.26096e+06	4.81773e+06	2.03684e+06	2.24835e+06	2.97011e+06	2.89702e+06	3.10235e+06	1.23477e+06	1.76648e+06	3	3	4	3	4	5	3	4
P70296	8	8	417.86	0.0412995	1.36101	wild type	PD-L1-KO	Phosphatidylethanolamine-binding protein 1 OS=Mus musculus GN=Pebp1 PE=1 SV=3 - [PEBP1_MOUSE]	1.88486e+06	1.98663e+06	1.41713e+06	1.40043e+06	1.22584e+06	1.32518e+06	1.36965e+06	994073	3.77612e+06	1.62676e+06	1.64879e+06	1.99769e+06	1.97957e+06	2.02256e+06	1.36965e+06	1.3926e+06	5	3	4	5	5	2	5	6
P84099	2	2	125.6	0.0418183	1.55885	wild type	PD-L1-KO	60S ribosomal protein L19 OS=Mus musculus GN=Rpl19 PE=1 SV=1 - [RL19_MOUSE]	455826	405102	329366	279445	275765	211330	294997	160743	913199	331720	383209	398625	445322	322544	294997	225185	1	1	2	1	2	1	1	1
P12815	1	1	55.16	0.0420743	2.07867	wild type	PD-L1-KO	Programmed cell death protein 6 OS=Mus musculus GN=Pdcd6 PE=1 SV=2 - [PDCD6_MOUSE]	60779.6	55328.8	64879.9	81661.4	11756.5	26588.6	59033.6	28976	121765	45306.3	75486.1	116489	18985	40580.9	59033.6	40592.5	0	0	1	0	0	0	1	0
Q8VDQ8	1	1	76.32	0.0421319	1.713	wild type	PD-L1-KO	NAD-dependent protein deacetylase sirtuin-2 OS=Mus musculus GN=Sirt2 PE=1 SV=2 - [SIR2_MOUSE]	59172.7	62845.9	73229.9	37604.4	43227	23651.8	42425.2	26628.8	118546	51461.7	85201.2	53642.2	69805.4	36098.6	42425.2	37304.2	1	1	1	0	1	0	0	0
P46471	13	13	666.48	0.0427353	1.4958	wild type	PD-L1-KO	26S protease regulatory subunit 7 OS=Mus musculus GN=Psmc2 PE=1 SV=5 - [PRS7_MOUSE]	729633	646066	1.13015e+06	797857	591976	436788	677687	502208	1.46174e+06	529035	1.31491e+06	1.13813e+06	955957	666650	677687	703543	6	4	6	6	9	0	6	3
Q8BGW0	11	9	544.23	0.0436716	1.44005	wild type	PD-L1-KO	Protein THEMIS OS=Mus musculus GN=Themis PE=1 SV=1 - [THMS1_MOUSE]	1.40835e+06	1.37066e+06	1.16109e+06	1.25727e+06	1.20921e+06	976130	824986	598831	2.82148e+06	1.12237e+06	1.3509e+06	1.79348e+06	1.9527e+06	1.48982e+06	824986	838902	2	3	4	3	5	1	5	4
Q61103	4	4	258.92	0.0440735	1.36888	wild type	PD-L1-KO	Zinc finger protein ubi-d4 OS=Mus musculus GN=Dpf2 PE=1 SV=1 - [REQU_MOUSE]	431372	394662	513484	489502	343556	418787	332598	241201	864206	323171	597426	698268	554795	639175	332598	337898	2	3	2	1	3	2	3	3
Q64735	5	5	220.3	0.0446664	2.09856	wild type	PD-L1-KO	Complement component receptor 1-like protein OS=Mus musculus GN=Cr1l PE=1 SV=1 - [CR1L_MOUSE]	224118	198557	133185	100228	72638.7	76684.8	125401	37912.8	448995	162589	154958	142975	117301	117040	125401	53112	2	1	2	1	2	1	2	1
P26039	87	85	4829.96	0.0453693	1.31541	wild type	PD-L1-KO	Talin-1 OS=Mus musculus GN=Tln1 PE=1 SV=2 - [TLN1_MOUSE]	1.29277e+07	1.13043e+07	1.19673e+07	9.19777e+06	9.52023e+06	9.90318e+06	8.1819e+06	6.90654e+06	2.58992e+07	9.25657e+06	1.39237e+07	1.31205e+07	1.53738e+07	1.51148e+07	8.1819e+06	9.67537e+06	46	31	59	38	48	39	38	40
Q8K183	1	1	27.33	0.0467461	3.46124	PD-L1-KO	wild type	Pyridoxal kinase OS=Mus musculus GN=Pdxk PE=1 SV=1 - [PDXK_MOUSE]	205.516	1213.95	634.237	8013.4	9128.94	4616.95	14664.7	6434.06	411.729	994.048	737.919	11431	14741.9	7046.63	14664.7	9013.47	0	0	0	0	1	0	0	0
Q9CX00	2	2	59.18	0.0470066	2.54973	wild type	PD-L1-KO	IST1 homolog OS=Mus musculus GN=Ist1 PE=2 SV=1 - [IST1_MOUSE]	177760	205193	168634	187424	22177.2	57818.5	195176	14666.5	356122	168023	196201	267358	35813	88245.7	195176	20546.3	2	2	0	2	0	1	1	1
B2RXR6	7	7	449.98	0.0472448	1.53714	wild type	PD-L1-KO	Serine/threonine-protein phosphatase 6 regulatory ankyrin repeat subunit B OS=Mus musculus GN=Ankrd44 PE=2 SV=1 - [ANR44_MOUSE]	504734	277439	310322	313792	298807	224409	206731	184927	1.01118e+06	227183	361053	447621	482531	342504	206731	259064	2	3	4	2	4	1	5	3
Q99ME9	4	4	129.49	0.0473085	4.58408	wild type	PD-L1-KO	Nucleolar GTP-binding protein 1 OS=Mus musculus GN=Gtpbp4 PE=2 SV=3 - [NOG1_MOUSE]	21629	12363.1	86806.2	23112.7	10983.5	3504.64	14583.3	2322.21	43331.3	10123.6	100997	32970	17736.8	5348.97	14583.3	3253.18	0	0	2	1	0	0	1	0
P41241	13	12	584.81	0.0476245	1.34079	wild type	PD-L1-KO	Tyrosine-protein kinase CSK OS=Mus musculus GN=Csk PE=1 SV=2 - [CSK_MOUSE]	921811	974519	762684	773932	635110	745372	712973	466945	1.84675e+06	797990	887364	1.104e+06	1.02561e+06	1.13763e+06	712973	654143	5	3	8	4	7	4	7	5
P11942	9	9	378.27	0.0487026	1.22554	wild type	PD-L1-KO	T-cell surface glycoprotein CD3 gamma chain OS=Mus musculus GN=Cd3g PE=1 SV=1 - [CD3G_MOUSE]	1.42961e+06	1.40561e+06	1.33147e+06	1.14765e+06	1.23723e+06	1.0508e+06	1.14415e+06	904154	2.86408e+06	1.15099e+06	1.54914e+06	1.63711e+06	1.99795e+06	1.60379e+06	1.14415e+06	1.26663e+06	6	7	8	5	5	4	5	6
Q80UG5	17	17	729.45	0.050063	1.19308	wild type	PD-L1-KO	Septin-9 OS=Mus musculus GN=Sept9 PE=1 SV=1 - [SEPT9_MOUSE]	868407	860300	749373	784404	687983	721889	759329	565306	1.73976e+06	704462	871877	1.11894e+06	1.11099e+06	1.10179e+06	759329	791936	6	5	11	3	10	8	7	4
Q64521	13	13	912.99	0.0501159	1.28522	wild type	PD-L1-KO	Glycerol-3-phosphate dehydrogenase, mitochondrial OS=Mus musculus GN=Gpd2 PE=1 SV=2 - [GPDM_MOUSE]	904139	1.03392e+06	952358	789677	904324	630302	718738	610033	1.81134e+06	846635	1.10804e+06	1.12646e+06	1.46036e+06	962001	718738	854594	7	7	10	4	8	3	6	5
Q61644	3	3	115.82	0.0508139	1.48694	wild type	PD-L1-KO	Protein kinase C and casein kinase substrate in neurons protein 1 OS=Mus musculus GN=Pacsin1 PE=1 SV=1 - [PACN1_MOUSE]	176534	195106	199979	199030	166234	128606	148833	74605.4	353668	159763	232671	283914	268444	196286	148833	104515	1	0	2	1	1	1	1	1
P32037	4	4	203.3	0.0510132	1.83126	wild type	PD-L1-KO	Solute carrier family 2, facilitated glucose transporter member 3 OS=Mus musculus GN=Slc2a3 PE=1 SV=1 - [GTR3_MOUSE]	177751	156590	143414	232002	72163.8	47571.4	165761	102083	356104	128225	166858	330948	116534	72606.1	165761	143008	2	2	1	1	1	0	2	1
Q05144	17	14	681.49	0.0510383	1.34346	wild type	PD-L1-KO	Ras-related C3 botulinum toxin substrate 2 OS=Mus musculus GN=Rac2 PE=2 SV=1 - [RAC2_MOUSE]	3.03847e+06	2.54237e+06	2.65953e+06	2.01788e+06	2.31036e+06	1.54195e+06	2.01666e+06	1.76673e+06	6.08725e+06	2.08183e+06	3.09429e+06	2.87848e+06	3.73091e+06	2.35341e+06	2.01666e+06	2.47501e+06	20	9	10	13	11	5	9	9
Q923D2	5	5	250.78	0.0511753	2.52941	wild type	PD-L1-KO	Flavin reductase (NADPH) OS=Mus musculus GN=Blvrb PE=2 SV=3 - [BLVRB_MOUSE]	511226	393768	397297	141090	100464	81919.3	268229	120027	1.02419e+06	322439	462246	201263	162235	125030	268229	168146	3	2	4	2	1	0	3	0
Q8BG05	64	47	2363.96	0.0512995	1.31381	wild type	PD-L1-KO	Heterogeneous nuclear ribonucleoprotein A3 OS=Mus musculus GN=Hnrnpa3 PE=1 SV=1 - [ROA3_MOUSE]	8.68195e+06	7.48152e+06	7.0022e+06	6.91732e+06	6.01295e+06	6.3362e+06	6.41917e+06	4.12922e+06	1.73933e+07	6.12628e+06	8.14688e+06	9.86747e+06	9.71007e+06	9.67064e+06	6.41917e+06	5.78463e+06	39	25	19	22	24	25	19	13
Q68FH4	2	1	96.15	0.0516526	1.87678	wild type	PD-L1-KO	N-acetylgalactosamine kinase OS=Mus musculus GN=Galk2 PE=1 SV=1 - [GALK2_MOUSE]	5726.14	6168.62	9565.28	5280.81	2535.88	2532.81	6989.97	2189.59	11471.7	5051.21	11129	7533.01	4095.09	3865.71	6989.97	3067.4	0	0	1	0	1	0	1	0
Q8C1B7	17	12	762.49	0.0522923	1.27534	wild type	PD-L1-KO	Septin-11 OS=Mus musculus GN=Sept11 PE=1 SV=4 - [SEP11_MOUSE]	966641	1.32042e+06	1.06281e+06	1.02393e+06	791970	831247	1.05542e+06	750876	1.93656e+06	1.08123e+06	1.23655e+06	1.46062e+06	1.27892e+06	1.26869e+06	1.05542e+06	1.0519e+06	4	2	5	6	6	3	6	6
Q3UHJ0	9	9	294.76	0.0543785	1.27147	wild type	PD-L1-KO	AP2-associated protein kinase 1 OS=Mus musculus GN=Aak1 PE=1 SV=2 - [AAK1_MOUSE]	189916	164495	189329	231407	184054	131096	141817	152680	380477	134698	220280	330099	297221	200086	141817	213889	0	1	5	3	6	0	3	1
Q9JHS3	3	3	134.84	0.0544473	2.94366	wild type	PD-L1-KO	Ragulator complex protein LAMTOR2 OS=Mus musculus GN=Lamtor2 PE=1 SV=1 - [LTOR2_MOUSE]	315568	244927	445533	104369	54492.7	63891.3	227877	30955.6	632205	200560	518366	148882	87998	97514.2	227877	43365.7	1	1	2	0	2	0	1	0
Q91YQ1	1	1	34.97	0.0556844	1.4295	wild type	PD-L1-KO	Ras-related protein Rab-7L1 OS=Mus musculus GN=Rab7l1 PE=2 SV=1 - [RAB7L_MOUSE]	23003.7	29589.7	21527.6	35827.8	23006.2	17175.5	21046.7	15685.5	46085.4	24229.7	25046.8	51108	37151.8	26214.2	21046.7	21973.8	0	1	1	0	0	0	1	0
Q8CBW3	2	2	114.31	0.0565921	1.81965	wild type	PD-L1-KO	Abl interactor 1 OS=Mus musculus GN=Abi1 PE=1 SV=3 - [ABI1_MOUSE]	30225.1	25282.5	35682.8	13618.4	15384.2	15993.9	15881.3	10339.1	60552.7	20702.7	41516.1	19426.5	24843.2	24410.8	15881.3	14484	1	0	2	1	1	1	1	0
P84084	5	1	210.71	0.0567965	4762	wild type	PD-L1-KO	ADP-ribosylation factor 5 OS=Mus musculus GN=Arf5 PE=2 SV=2 - [ARF5_MOUSE]	15243.8	3406.69	0	83.5981	0	3.93409	0	0	30539.4	2789.59	0	119.252	0	6.00441	0	0	1	0	0	0	0	0	0	0
Q8R323	1	1	40.74	0.0571561	1.74949	wild type	PD-L1-KO	Replication factor C subunit 3 OS=Mus musculus GN=Rfc3 PE=2 SV=1 - [RFC3_MOUSE]	8734.13	6860	7686.69	4750.53	2132.12	5052.38	3256.65	5581.38	17497.9	5617.35	8943.27	6776.56	3443.07	7711.21	3256.65	7818.96	0	0	0	1	1	0	0	0
P09602	6	6	95.61	0.0576935	2.15737	PD-L1-KO	wild type	Non-histone chromosomal protein HMG-17 OS=Mus musculus GN=Hmgn2 PE=1 SV=2 - [HMGN2_MOUSE]	54377.9	64315	125078	486013	467935	345816	378047	382614	108940	52664.7	145525	693292	755649	527802	378047	536004	0	0	0	2	2	3	0	1
Q7TNP2	5	1	257.13	0.0577136	22.9326	wild type	PD-L1-KO	Serine/threonine-protein phosphatase 2A 65 kDa regulatory subunit A beta isoform OS=Mus musculus GN=Ppp2r1b PE=1 SV=2 - [2AAB_MOUSE]	1.7983e+06	48357	622216	4.43979e+06	88132.7	157478	30925.8	24722.7	3.6027e+06	39597.4	723933	6.3333e+06	142322	240351	30925.8	34634.1	0	0	0	0	1	0	0	0
Q91Z38	2	2	121.8	0.0581519	2.27955	wild type	PD-L1-KO	Tetratricopeptide repeat protein 1 OS=Mus musculus GN=Ttc1 PE=2 SV=1 - [TTC1_MOUSE]	75399.5	61541.7	73848.3	62850.5	52837.2	12617.7	46831.8	7754.83	151055	50393.8	85920.7	89655.4	85324.5	19257.8	46831.8	10863.7	1	0	1	1	0	1	0	0
Q9ES00	1	1	33.19	0.0588407	1.49188	wild type	PD-L1-KO	Ubiquitin conjugation factor E4 B OS=Mus musculus GN=Ube4b PE=1 SV=3 - [UBE4B_MOUSE]	13025.4	13736.4	11246.3	9126.2	8365.84	8637.72	9754.65	4835.68	26095	11248.1	13084.8	13018.4	13509.6	13183.3	9754.65	6774.3	1	1	1	1	0	1	0	0
P63168	5	5	472.27	0.0603566	1.59087	wild type	PD-L1-KO	Dynein light chain 1, cytoplasmic OS=Mus musculus GN=Dynll1 PE=1 SV=1 - [DYL1_MOUSE]	252907	174541	135881	118616	115733	92371.5	129441	91115.1	506672	142924	158094	169204	186892	140982	129441	127643	2	2	2	2	2	0	2	2
O08664	1	1	30.94	0.0614475	2.61682	wild type	PD-L1-KO	B-cell CLL/lymphoma 7 protein family member C OS=Mus musculus GN=Bcl7c PE=1 SV=1 - [BCL7C_MOUSE]	18815.4	17982.6	16955.4	5242.04	3388.1	10301.9	2751.13	6103.65	37694.5	14725.2	19727.2	7477.7	5471.3	15723.2	2751.13	8550.6	1	0	0	0	0	0	0	0
P35585	3	3	137.97	0.0623367	1.19146	wild type	PD-L1-KO	AP-1 complex subunit mu-1 OS=Mus musculus GN=Ap1m1 PE=1 SV=3 - [AP1M1_MOUSE]	237896	249550	210090	280502	200097	212905	226008	181863	476599	204346	244434	400132	323129	324947	226008	254772	1	1	2	1	3	1	1	1
Q60854	7	7	294.33	0.0629306	1.62157	wild type	PD-L1-KO	Serpin B6 OS=Mus musculus GN=Serpinb6 PE=2 SV=1 - [SPB6_MOUSE]	250980	271389	216507	134412	102498	133427	192022	110597	502811	222228	251900	191736	165520	203643	192022	154935	1	1	3	1	0	1	4	3
P55264	4	4	228.81	0.0630778	1.50977	wild type	PD-L1-KO	Adenosine kinase OS=Mus musculus GN=Adk PE=1 SV=2 - [ADK_MOUSE]	59974.4	67824.9	87869.3	82376.6	40917.6	46846.2	76432.4	33214.5	120152	55538.8	102234	117509	66076.2	71499.2	76432.4	46530.2	1	1	2	3	3	0	2	2
Q9CQQ7	4	4	197.36	0.0643616	1.31486	PD-L1-KO	wild type	ATP synthase subunit b, mitochondrial OS=Mus musculus GN=Atp5f1 PE=1 SV=1 - [AT5F1_MOUSE]	425720	547460	374922	557770	663527	657263	689709	495458	852884	448291	436212	795651	1.0715e+06	1.00315e+06	689709	694086	3	2	4	3	3	2	4	3
Q8K339	1	1	21.71	0.0648956	1.46784	PD-L1-KO	wild type	DNA/RNA-binding protein KIN17 OS=Mus musculus GN=Kin PE=2 SV=1 - [KIN17_MOUSE]	1537.31	1692.38	3057.39	2372.76	2632.98	3284.97	2841.93	3951.39	3079.84	1385.82	3557.19	3384.71	4251.89	5013.7	2841.93	5535.51	0	0	0	0	1	0	0	0
P02088	19	18	1073.2	0.0651246	4.05468	wild type	PD-L1-KO	Hemoglobin subunit beta-1 OS=Mus musculus GN=Hbb-b1 PE=1 SV=2 - [HBB1_MOUSE]	7.40922e+07	4.51493e+07	6.17219e+07	9.42835e+06	9.741e+06	3.92011e+06	2.0842e+07	1.2453e+07	1.48436e+08	3.69708e+07	7.1812e+07	1.34494e+07	1.57303e+07	5.98308e+06	2.0842e+07	1.74453e+07	34	41	56	10	15	2	30	15
Q9CRB2	3	3	132.81	0.0651759	1.99101	PD-L1-KO	wild type	H/ACA ribonucleoprotein complex subunit 2 OS=Mus musculus GN=Nhp2 PE=2 SV=1 - [NHP2_MOUSE]	69224.7	38932.5	44296.6	15386.9	121546	60603.3	72817.8	79205.6	138684	31880.1	51538	21949.2	196279	92496	72817.8	110959	1	0	1	0	2	0	1	0
P22682	2	2	94.38	0.0651863	1.25292	wild type	PD-L1-KO	E3 ubiquitin-protein ligase CBL OS=Mus musculus GN=Cbl PE=1 SV=3 - [CBL_MOUSE]	124112	114556	93566	109197	90658.6	105251	86064.5	70347.5	248645	93804.8	108862	155768	146401	160639	86064.5	98549.8	1	0	1	0	2	1	1	1
P21958	20	19	1056.42	0.0653783	1.17886	PD-L1-KO	wild type	Antigen peptide transporter 1 OS=Mus musculus GN=Tap1 PE=2 SV=3 - [TAP1_MOUSE]	2.19768e+06	1.94067e+06	1.57024e+06	1.72197e+06	2.09963e+06	2.11399e+06	2.24794e+06	2.29807e+06	4.40282e+06	1.58913e+06	1.82694e+06	2.45636e+06	3.3906e+06	3.22648e+06	2.24794e+06	3.21936e+06	8	6	8	8	13	5	10	10
P48453	3	2	184.48	0.0654483	1.51009	wild type	PD-L1-KO	Serine/threonine-protein phosphatase 2B catalytic subunit beta isoform OS=Mus musculus GN=Ppp3cb PE=2 SV=2 - [PP2BB_MOUSE]	45338.2	51354.5	39243.5	40901.4	26864.8	43539	29951.7	16748.6	90830.3	42051.9	45658.8	58345.3	43382.8	66451.6	29951.7	23463.2	1	1	1	1	2	0	0	1
Q64152	7	6	414.28	0.0665722	1.77161	wild type	PD-L1-KO	Transcription factor BTF3 OS=Mus musculus GN=Btf3 PE=2 SV=3 - [BTF3_MOUSE]	1.40758e+06	1.55056e+06	994201	966918	499494	344391	1.22596e+06	706882	2.81994e+06	1.26968e+06	1.15673e+06	1.3793e+06	806612	525627	1.22596e+06	990271	3	4	3	1	3	0	4	2
Q7TNG5	3	2	137.17	0.0667011	1.7105	wild type	PD-L1-KO	Echinoderm microtubule-associated protein-like 2 OS=Mus musculus GN=Eml2 PE=2 SV=1 - [EMAL2_MOUSE]	25294.5	28721.2	25228.3	13417.6	11022.2	13114.6	20741.7	9293.9	50674.9	23518.5	29352.5	19140	17799.3	20016.1	20741.7	13019.8	0	1	0	0	0	0	0	0
P30416	8	8	440.64	0.0677194	1.55868	wild type	PD-L1-KO	Peptidyl-prolyl cis-trans isomerase FKBP4 OS=Mus musculus GN=Fkbp4 PE=1 SV=5 - [FKBP4_MOUSE]	665513	783490	644621	900189	248281	614317	488782	569357	1.33328e+06	641565	750001	1.28411e+06	400939	937604	488782	797612	3	3	6	4	4	2	4	4
O54957	5	5	151.6	0.0680477	1.30942	PD-L1-KO	wild type	Linker for activation of T-cells family member 1 OS=Mus musculus GN=Lat PE=1 SV=1 - [LAT_MOUSE]	230862	288968	296003	227269	356541	370855	384445	254019	462506	236623	344393	324196	575763	566019	384445	355855	1	1	1	2	1	0	3	2
Q8BMS9	5	5	252.2	0.0689194	1.55622	wild type	PD-L1-KO	Ras association domain-containing protein 2 OS=Mus musculus GN=Rassf2 PE=2 SV=1 - [RASF2_MOUSE]	426514	563563	398370	404698	174276	389496	383048	205427	854474	461477	463494	577297	281432	594469	383048	287783	2	1	4	3	2	1	3	3
Q61790	8	8	332.88	0.0693852	1.78088	wild type	PD-L1-KO	Lymphocyte activation gene 3 protein OS=Mus musculus GN=Lag3 PE=2 SV=1 - [LAG3_MOUSE]	284940	348540	247272	270828	126775	329428	122289	68144.9	570847	285403	287695	386333	204724	502791	122289	95464.1	4	1	3	2	2	4	1	1
Q80YW0	3	3	179.25	0.0699649	1.55711	wild type	PD-L1-KO	Cytohesin-4 OS=Mus musculus GN=Cyth4 PE=2 SV=1 - [CYH4_MOUSE]	197550	172278	219169	263163	127702	79974.6	219230	120364	395770	141071	254998	375399	206220	122061	219230	168618	2	2	3	2	2	1	3	2
P20152	109	101	5905.59	0.0699961	1.34294	PD-L1-KO	wild type	Vimentin OS=Mus musculus GN=Vim PE=1 SV=3 - [VIME_MOUSE]	6.96573e+07	7.66485e+07	5.34855e+07	6.68498e+07	8.22223e+07	1.10436e+08	9.75373e+07	6.78864e+07	1.39551e+08	6.27641e+07	6.22291e+07	9.53603e+07	1.32777e+08	1.68554e+08	9.75373e+07	9.5102e+07	113	116	104	99	118	123	149	98
Q9WV32	39	38	1921.85	0.0701603	1.24776	wild type	PD-L1-KO	Actin-related protein 2/3 complex subunit 1B OS=Mus musculus GN=Arpc1b PE=1 SV=4 - [ARC1B_MOUSE]	4.97342e+06	3.99367e+06	4.54389e+06	3.60252e+06	3.90868e+06	3.08253e+06	3.78209e+06	2.9421e+06	9.9637e+06	3.27024e+06	5.2867e+06	5.13895e+06	6.31196e+06	4.70472e+06	3.78209e+06	4.12158e+06	26	23	24	20	26	15	19	18
P11103	7	7	379.21	0.0702428	1.33274	PD-L1-KO	wild type	Poly [ADP-ribose] polymerase 1 OS=Mus musculus GN=Parp1 PE=1 SV=3 - [PARP1_MOUSE]	262017	250128	201929	199052	259019	406817	268090	283033	524923	204819	234939	283945	418278	620906	268090	396501	1	1	3	3	4	3	3	3
Q99PG2	2	2	43.02	0.070417	1.35531	PD-L1-KO	wild type	Opioid growth factor receptor OS=Mus musculus GN=Ogfr PE=2 SV=1 - [OGFR_MOUSE]	28546.6	25493.3	18380.5	24467.9	31166.2	40601.5	34437.7	25107.9	57189.9	20875.3	21385.3	34903.1	50328.9	61968.1	34437.7	35173.7	0	0	0	0	0	0	1	0
Q9Z2R6	2	1	65.17	0.070523	9.58608	wild type	PD-L1-KO	Protein unc-119 homolog A OS=Mus musculus GN=Unc119 PE=1 SV=1 - [U119A_MOUSE]	6526.02	1951.4	4942.93	4403.52	291.304	267.051	0	1301	13074.2	1597.92	5750.98	6281.57	470.414	407.587	0	1822.56	1	0	0	0	0	0	0	0
P62855	2	2	86.71	0.0706609	2.70962	wild type	PD-L1-KO	40S ribosomal protein S26 OS=Mus musculus GN=Rps26 PE=2 SV=3 - [RS26_MOUSE]	251897	156569	255517	68402.6	22010.1	84753.2	117850	45677	504648	128207	297288	97575.5	35543.1	129355	117850	63988.8	1	1	1	1	0	0	0	0
Q91VI7	25	23	1528.7	0.0707108	1.37044	wild type	PD-L1-KO	Ribonuclease inhibitor OS=Mus musculus GN=Rnh1 PE=1 SV=1 - [RINI_MOUSE]	2.3316e+06	2.28849e+06	2.20206e+06	1.8152e+06	1.70565e+06	1.77678e+06	1.82036e+06	999820	4.67111e+06	1.87394e+06	2.56204e+06	2.58936e+06	2.75438e+06	2.71181e+06	1.82036e+06	1.40065e+06	15	16	16	15	14	10	15	7
P62245	9	9	490.96	0.0709067	1.60225	wild type	PD-L1-KO	40S ribosomal protein S15a OS=Mus musculus GN=Rps15a PE=2 SV=2 - [RS15A_MOUSE]	681697	400496	592738	336724	399414	218350	312389	325365	1.36571e+06	327948	689637	480332	644997	333257	312389	455803	6	1	5	3	5	0	6	2
Q9CQV8	21	10	1030.01	0.0713318	1.49148	wild type	PD-L1-KO	14-3-3 protein beta/alpha OS=Mus musculus GN=Ywhab PE=1 SV=3 - [1433B_MOUSE]	1.11193e+06	990832	847995	993554	672563	430494	1.06064e+06	480863	2.22764e+06	811348	986622	1.41729e+06	1.08609e+06	657042	1.06064e+06	673641	6	5	7	3	5	2	6	6
P39054	9	9	555.55	0.0726715	1.37988	wild type	PD-L1-KO	Dynamin-2 OS=Mus musculus GN=Dnm2 PE=1 SV=2 - [DYN2_MOUSE]	448513	459219	342986	268661	301413	306090	245657	247932	898548	376034	399056	383241	486739	467171	245657	347327	2	1	6	5	5	2	4	5
Q810V0	1	1	52.69	0.0732825	14.5921	PD-L1-KO	wild type	U3 small nucleolar ribonucleoprotein protein MPP10 OS=Mus musculus GN=Mphosph10 PE=1 SV=2 - [MPP10_MOUSE]	4591.25	10843	1033.78	966.329	6688.35	220643	9982.6	17089	9198.07	8878.82	1202.78	1378.46	10800.7	336757	9982.6	23939.9	0	0	0	0	0	1	0	0
Q9R0P3	11	11	520.72	0.0733613	1.61146	wild type	PD-L1-KO	S-formylglutathione hydrolase OS=Mus musculus GN=Esd PE=2 SV=1 - [ESTD_MOUSE]	1.40868e+06	1.32173e+06	1.38171e+06	1.22433e+06	603119	1.36331e+06	941834	403300	2.82214e+06	1.08231e+06	1.60759e+06	1.74648e+06	973952	2.08076e+06	941834	564983	6	3	5	3	5	4	3	2
P63330	8	4	437.73	0.0735828	1.26012	wild type	PD-L1-KO	Serine/threonine-protein phosphatase 2A catalytic subunit alpha isoform OS=Mus musculus GN=Ppp2ca PE=1 SV=1 - [PP2AA_MOUSE]	605274	509791	571981	465085	462193	467440	458977	319265	1.2126e+06	417445	665486	663438	746376	713432	458977	447259	1	1	3	1	1	0	1	1
O70493	3	2	163.76	0.0740518	1.91666	wild type	PD-L1-KO	Sorting nexin-12 OS=Mus musculus GN=Snx12 PE=2 SV=1 - [SNX12_MOUSE]	164411	202804	164858	209614	34161	45420.9	196145	111242	329379	166067	191808	299012	55165.1	69323.7	196145	155839	1	1	1	0	1	0	2	1
Q8BH04	2	2	41.7	0.0755879	3.84568	wild type	PD-L1-KO	Phosphoenolpyruvate carboxykinase [GTP], mitochondrial OS=Mus musculus GN=Pck2 PE=2 SV=1 - [PCKGM_MOUSE]	10524.2	10978.5	61952.1	11876.5	2080.03	13234.4	4179.01	5295.76	21084.2	8989.83	72079.8	16941.6	3358.95	20199	4179.01	7418.83	0	0	2	0	0	0	0	1
Q3UUV5	5	5	295.61	0.0759785	1.19345	wild type	PD-L1-KO	Src kinase-associated phosphoprotein 1 OS=Mus musculus GN=Skap1 PE=1 SV=1 - [SKAP1_MOUSE]	450093	473403	439832	400030	404366	397467	385534	290160	901713	387648	511734	570637	652994	606635	385534	406484	2	1	3	3	3	2	2	2
Q3U1F9	2	2	49.87	0.0784017	1.45819	PD-L1-KO	wild type	Phosphoprotein associated with glycosphingolipid-enriched microdomains 1 OS=Mus musculus GN=Pag1 PE=1 SV=2 - [PHAG1_MOUSE]	19151.8	26353	23004.9	10866.1	31967	26523.5	30643.6	26610.9	38368.6	21579.3	26765.7	15500.3	51622.3	40481.5	30643.6	37279.2	0	0	0	0	0	0	0	0
P97384	18	18	950.2	0.0786351	1.24213	wild type	PD-L1-KO	Annexin A11 OS=Mus musculus GN=Anxa11 PE=1 SV=2 - [ANX11_MOUSE]	1.06231e+06	1.08096e+06	1.17164e+06	1.225e+06	664735	1.00275e+06	940494	1.04696e+06	2.12822e+06	885151	1.36317e+06	1.74744e+06	1.07345e+06	1.53045e+06	940494	1.46669e+06	3	4	6	6	5	4	8	6
B2RQC6	7	6	340.04	0.0798537	1.82527	wild type	PD-L1-KO	CAD protein OS=Mus musculus GN=Cad PE=2 SV=1 - [PYR1_MOUSE]	104257	132308	133335	283811	108126	116505	66622.4	66893	208868	108342	155133	404853	174607	177817	66622.4	93710.4	0	0	5	1	5	1	2	2
Q99JY0	9	8	463.34	0.0801488	1.26556	wild type	PD-L1-KO	Trifunctional enzyme subunit beta, mitochondrial OS=Mus musculus GN=Hadhb PE=1 SV=1 - [ECHB_MOUSE]	1.51492e+06	1.3594e+06	994296	1.5537e+06	1.05831e+06	1.10956e+06	1.11233e+06	1.00432e+06	3.03498e+06	1.11315e+06	1.15684e+06	2.21633e+06	1.70901e+06	1.69347e+06	1.11233e+06	1.40696e+06	6	4	6	4	8	1	3	3
Q9CZY3	5	1	384.16	0.0814915	1.34044	wild type	PD-L1-KO	Ubiquitin-conjugating enzyme E2 variant 1 OS=Mus musculus GN=Ube2v1 PE=1 SV=1 - [UB2V1_MOUSE]	79129.2	85387.5	64096.4	87337.5	58396.8	81668.3	43714.3	51927.6	158527	69920	74574.6	124586	94302.6	124646	43714.3	72745.3	1	1	0	0	0	1	0	0
Q8VHR5	7	7	287.84	0.0832098	1.42246	PD-L1-KO	wild type	Transcriptional repressor p66-beta OS=Mus musculus GN=Gatad2b PE=1 SV=1 - [P66B_MOUSE]	145881	211507	282023	243542	394914	249765	272325	338963	292257	173194	328127	347410	637731	381205	272325	474853	1	2	4	3	6	2	3	3
Q922D8	9	8	575.25	0.0842215	1.41278	wild type	PD-L1-KO	C-1-tetrahydrofolate synthase, cytoplasmic OS=Mus musculus GN=Mthfd1 PE=1 SV=4 - [C1TC_MOUSE]	394877	342222	369859	213762	271754	249271	222208	191600	791093	280230	430321	304928	438844	380450	222208	268413	6	3	4	3	4	3	2	2
Q8C570	6	5	320.27	0.0844476	1.12202	PD-L1-KO	wild type	mRNA export factor OS=Mus musculus GN=Rae1 PE=1 SV=1 - [RAE1L_MOUSE]	146087	142896	155012	127250	169479	145440	155721	170310	292670	117011	180352	181520	273685	221979	155721	238587	0	1	3	2	3	1	2	3
P24788	2	2	92.54	0.0845765	1.60046	wild type	PD-L1-KO	Cyclin-dependent kinase 11B OS=Mus musculus GN=Cdk11b PE=1 SV=2 - [CD11B_MOUSE]	131906	115740	100990	165625	38833.2	76101.9	98093.2	108291	264259	94774	117499	236262	62710.1	116151	98093.2	151705	1	1	1	1	1	0	2	0
P01901	20	12	786.47	0.0848677	1.35245	wild type	PD-L1-KO	H-2 class I histocompatibility antigen, K-B alpha chain OS=Mus musculus GN=H2-K1 PE=1 SV=1 - [HA1B_MOUSE]	2.47875e+06	2.20072e+06	1.97017e+06	1.79353e+06	1.67188e+06	1.85036e+06	1.71441e+06	1.0062e+06	4.9659e+06	1.80207e+06	2.29224e+06	2.55845e+06	2.69984e+06	2.82412e+06	1.71441e+06	1.40958e+06	8	9	10	7	8	8	7	6
Q9CQR6	5	5	264.91	0.0867427	1.67755	wild type	PD-L1-KO	Serine/threonine-protein phosphatase 6 catalytic subunit OS=Mus musculus GN=Ppp6c PE=2 SV=1 - [PPP6_MOUSE]	203795	203030	207522	232712	81762.9	51320.1	187137	184719	408282	166252	241447	331961	132036	78327.4	187137	258773	1	2	3	1	2	0	3	2
Q9CR98	1	1	46.87	0.0872413	3.07651	PD-L1-KO	wild type	Protein FAM136A OS=Mus musculus GN=Fam136a PE=1 SV=1 - [F136A_MOUSE]	562.665	301.433	1889.38	5913.68	10988.3	5504.23	8248.89	1923.18	1127.24	246.83	2198.25	8435.79	17744.5	8400.85	8248.89	2694.18	0	0	0	0	1	0	0	0
Q9Z1M8	1	1	46.75	0.0883389	1.94956	PD-L1-KO	wild type	Protein Red OS=Mus musculus GN=Ik PE=2 SV=2 - [RED_MOUSE]	20283.9	15473.1	4402.34	9428.59	35435.8	25929.1	19555.2	15754.5	40636.7	12670.2	5122.02	13449.8	57223.8	39574.4	19555.2	22070.5	1	0	0	0	0	0	0	1
P10639	13	13	672.56	0.0888006	1.40154	wild type	PD-L1-KO	Thioredoxin OS=Mus musculus GN=Txn PE=1 SV=3 - [THIO_MOUSE]	5.02292e+06	3.71192e+06	3.3378e+06	2.82668e+06	2.43621e+06	2.82499e+06	3.37308e+06	1.99641e+06	1.00629e+07	3.03953e+06	3.88345e+06	4.03223e+06	3.93414e+06	4.31166e+06	3.37308e+06	2.79677e+06	4	6	8	4	4	4	7	4
Q8CI51	11	11	329.43	0.088995	1.11157	wild type	PD-L1-KO	PDZ and LIM domain protein 5 OS=Mus musculus GN=Pdlim5 PE=1 SV=4 - [PDLI5_MOUSE]	163596	155824	178663	183291	156580	157078	161614	137710	327747	127598	207870	261462	252854	239740	161614	192918	1	1	4	5	6	2	2	3
O88879	1	1	24.27	0.0891392	2.0619	wild type	PD-L1-KO	Apoptotic protease-activating factor 1 OS=Mus musculus GN=Apaf1 PE=1 SV=3 - [APAF_MOUSE]	22020.6	21193.3	19755.3	16043.5	5401.31	10877.9	20225.4	1815.78	44115.8	17354.2	22984.9	22885.8	8722.35	16602.4	20225.4	2543.73	0	1	0	0	0	0	0	0
P27612	3	3	165.19	0.0899393	1.40719	wild type	PD-L1-KO	Phospholipase A-2-activating protein OS=Mus musculus GN=Plaa PE=2 SV=4 - [PLAP_MOUSE]	98326.2	105559	126687	123843	70219.6	131155	59026.8	62521.4	196986	86437.2	147397	176660	113395	200175	59026.8	87586.2	1	1	2	2	2	1	1	2
P46062	8	8	309.78	0.0899827	1.23416	wild type	PD-L1-KO	Signal-induced proliferation-associated protein 1 OS=Mus musculus GN=Sipa1 PE=2 SV=2 - [SIPA1_MOUSE]	231432	207759	178441	216296	155159	206727	179771	134046	463649	170124	207611	308544	250560	315518	179771	187785	2	5	5	4	1	2	3	3
P01887	7	7	369.28	0.0900663	1.66571	wild type	PD-L1-KO	Beta-2-microglobulin OS=Mus musculus GN=B2m PE=1 SV=2 - [B2MG_MOUSE]	1.71615e+06	959118	1.0344e+06	635688	796610	672774	659221	480111	3.43812e+06	785379	1.2035e+06	906800	1.28641e+06	1.02682e+06	659221	672587	10	7	16	4	11	4	12	11
Q8CFQ3	3	3	102.7	0.0902214	1.23324	PD-L1-KO	wild type	Intron-binding protein aquarius OS=Mus musculus GN=Aqr PE=2 SV=2 - [AQR_MOUSE]	61680	67524	77056	68772.2	82619	67254.8	103625	85683	123569	55292.4	89652.7	98102.6	133418	102648	103625	120033	0	1	2	2	1	0	2	1
Q8VDM1	2	2	63.85	0.0903112	5.92033	wild type	PD-L1-KO	Zinc finger CCCH-type with G patch domain-containing protein OS=Mus musculus GN=Zgpat PE=2 SV=1 - [ZGPAT_MOUSE]	33129.8	11319.3	34851.8	2129.19	1638.89	2468.04	5517.68	4129.71	66371.9	9268.89	40549.2	3037.26	2646.58	3766.85	5517.68	5785.3	0	0	1	0	0	0	0	0
P29452	3	3	122.01	0.0914219	1.89071	wild type	PD-L1-KO	Caspase-1 OS=Mus musculus GN=Casp1 PE=1 SV=1 - [CASP1_MOUSE]	111948	114221	71471.8	72977.6	15858.2	50734.2	102722	26706.2	224276	93530.7	83155.7	104102	25608.8	77433.3	102722	37412.7	1	1	2	2	2	1	2	1
P49718	20	20	895.32	0.0917556	1.39132	wild type	PD-L1-KO	DNA replication licensing factor MCM5 OS=Mus musculus GN=Mcm5 PE=2 SV=1 - [MCM5_MOUSE]	2.44312e+06	2.14466e+06	2.28537e+06	1.76539e+06	1.57682e+06	1.85828e+06	1.85068e+06	923087	4.89452e+06	1.75616e+06	2.65898e+06	2.51831e+06	2.54635e+06	2.83621e+06	1.85068e+06	1.29315e+06	5	5	10	5	12	3	8	5
Q6NVF4	1	1	31.69	0.0926237	1.91979	wild type	PD-L1-KO	DNA helicase B OS=Mus musculus GN=Helb PE=1 SV=2 - [HELB_MOUSE]	10854.7	7993.44	11907	9843.67	1251.55	4506.46	11540.3	3849.27	21746.3	6545.47	13853.5	14041.9	2021.08	6878	11540.3	5392.44	1	0	0	0	0	0	0	1
Q6ZWY3	2	1	111.78	0.0936357	1.88759	wild type	PD-L1-KO	40S ribosomal protein S27-like OS=Mus musculus GN=Rps27l PE=2 SV=3 - [RS27L_MOUSE]	35963.1	41181.9	23608.2	13252.6	11449.4	17591.9	19452	11904.2	72048.2	33722	27467.6	18904.6	18489.1	26849.6	19452	16676.6	0	0	1	0	0	0	0	0
P59017	2	2	45.27	0.0938662	1.30783	wild type	PD-L1-KO	Bcl-2-like protein 13 OS=Mus musculus GN=Bcl2l13 PE=1 SV=2 - [B2L13_MOUSE]	309819	301902	270270	350987	229003	297017	258852	157895	620689	247214	314452	500679	369807	453323	258852	221195	1	0	1	0	0	0	0	0
Q7TSC1	3	3	72.5	0.0942723	1.25422	wild type	PD-L1-KO	Protein PRRC2A OS=Mus musculus GN=Prrc2a PE=1 SV=1 - [PRC2A_MOUSE]	32760.7	30119.7	28401.5	30718	21453.5	27892.6	30099.3	17825.9	65632.5	24663.7	33044.4	43818.8	34644.4	42571.1	30099.3	24972.3	0	1	0	2	0	1	0	0
Q9WTI7	3	3	119.71	0.0945093	1.25586	wild type	PD-L1-KO	Unconventional myosin-Ic OS=Mus musculus GN=Myo1c PE=1 SV=2 - [MYO1C_MOUSE]	76127.2	81743.8	89791	94956.9	73902.6	60628.6	86499.3	51786.6	152513	66936.3	104470	135455	119342	92534.5	86499.3	72547.8	1	2	2	0	1	0	1	0
Q9R1P4	15	14	541.42	0.0953746	1.34092	wild type	PD-L1-KO	Proteasome subunit alpha type-1 OS=Mus musculus GN=Psma1 PE=1 SV=1 - [PSA1_MOUSE]	990885	1.11136e+06	1.20911e+06	1.1445e+06	999630	753271	1.04725e+06	522825	1.98513e+06	910045	1.40677e+06	1.63261e+06	1.61426e+06	1.14968e+06	1.04725e+06	732425	3	5	8	6	7	7	5	5
Q9WUA2	8	8	329.96	0.0959849	1.44809	wild type	PD-L1-KO	Phenylalanine--tRNA ligase beta subunit OS=Mus musculus GN=Farsb PE=2 SV=2 - [SYFB_MOUSE]	432142	444900	326747	462941	302287	288374	400961	159361	865750	364309	380162	660379	488151	440131	400961	223249	4	5	4	2	4	1	3	1
Q8BWR2	1	1	28.99	0.0963295	2.57708	wild type	PD-L1-KO	PITH domain-containing protein 1 OS=Mus musculus GN=Pithd1 PE=2 SV=1 - [PITH1_MOUSE]	15102.6	16433.9	3514.26	11634.3	4211.61	9808.82	1965.68	2129.39	30256.4	13457	4088.75	16596.2	6801.15	14970.7	1965.68	2983.06	0	0	0	0	0	1	0	0
Q6P9Q6	2	1	65.5	0.0970834	3.27118	wild type	PD-L1-KO	FK506-binding protein 15 OS=Mus musculus GN=Fkbp15 PE=1 SV=2 - [FKB15_MOUSE]	9146.54	10680.8	11748.5	6665.3	0	9024.51	0	2665.79	18324.1	8746	13669	9507.96	0	13773.7	0	3734.5	0	0	1	0	0	1	0	0
Q9DBU0	1	1	75.11	0.0971366	1.79936	wild type	PD-L1-KO	Transmembrane 9 superfamily member 1 OS=Mus musculus GN=Tm9sf1 PE=2 SV=2 - [TM9S1_MOUSE]	16996	24544.8	16136.6	42469.3	14921.9	9216.22	20240.4	11278.4	34049.7	20098.7	18774.5	60581.9	24096.7	14066.3	20240.4	15800	0	0	1	0	1	0	0	0
Q9CPV4	3	3	154.16	0.0976423	1.93511	wild type	PD-L1-KO	Glyoxalase domain-containing protein 4 OS=Mus musculus GN=Glod4 PE=2 SV=1 - [GLOD4_MOUSE]	39330.6	26643.5	69668	37752.9	44762.6	21493.9	8831.63	14516.6	78794.5	21817.2	81057	53854	72285.3	32805.2	8831.63	20336.4	1	1	2	1	2	0	0	0
Q9JKF1	31	29	1930.92	0.0991004	1.2787	wild type	PD-L1-KO	Ras GTPase-activating-like protein IQGAP1 OS=Mus musculus GN=Iqgap1 PE=1 SV=2 - [IQGA1_MOUSE]	5.14905e+06	4.63138e+06	4.5174e+06	4.1986e+06	3.26648e+06	4.98378e+06	3.57004e+06	2.64473e+06	1.03156e+07	3.79243e+06	5.25588e+06	5.98925e+06	5.2749e+06	7.60651e+06	3.57004e+06	3.705e+06	21	10	17	12	16	15	15	9
Q8BNI4	3	3	69.93	0.0991714	1.64356	wild type	PD-L1-KO	Derlin-2 OS=Mus musculus GN=Derl2 PE=2 SV=2 - [DERL2_MOUSE]	286208	254548	162627	332218	178520	76875.5	210967	163735	573387	208438	189213	473905	288284	117331	210967	229376	1	1	1	1	0	0	1	0
Q08024	6	6	346.65	0.0994284	1.46121	wild type	PD-L1-KO	Core-binding factor subunit beta OS=Mus musculus GN=Cbfb PE=1 SV=1 - [PEBB_MOUSE]	517873	552268	516476	498776	444219	273443	521839	187671	1.0375e+06	452228	600907	711497	717351	417344	521839	262909	4	2	2	2	2	0	1	3
Q91WG2	4	4	202.83	0.0997671	1.34656	wild type	PD-L1-KO	Rab GTPase-binding effector protein 2 OS=Mus musculus GN=Rabep2 PE=2 SV=3 - [RABE2_MOUSE]	40241.7	41174.1	60366.8	54561.5	46548.4	26567.6	38778.5	33916.9	80619.9	33715.7	70235.4	77831.3	75169	40548.9	38778.5	47514.2	0	0	2	2	1	0	1	1
P47226	3	3	116.61	0.0998774	1.4675	wild type	PD-L1-KO	Testin OS=Mus musculus GN=Tes PE=1 SV=1 - [TES_MOUSE]	146436	159206	138742	170100	151347	125136	88888	53358.7	293368	130367	161423	242646	244403	190989	88888	74750.1	1	0	2	1	2	1	1	1
Q9CX60	2	2	91.84	0.100249	1.37903	wild type	PD-L1-KO	Protein LBH OS=Mus musculus GN=Lbh PE=1 SV=1 - [LBH_MOUSE]	155935	163879	193443	184164	173601	155180	83117.6	93833.7	312399	134194	225066	262708	280342	236844	83117.6	131452	2	1	1	2	2	2	0	1
P28867	2	2	87.41	0.101282	1.70625	wild type	PD-L1-KO	Protein kinase C delta type OS=Mus musculus GN=Prkcd PE=1 SV=3 - [KPCD_MOUSE]	64428.6	79567.9	79887.9	85435.5	79718.8	47640.4	39135.7	14791.1	129076	65154.6	92947.6	121873	128735	72711.3	39135.7	20720.9	0	0	1	0	1	1	0	0
P19001	7	3	191.8	0.101563	2.98387	wild type	PD-L1-KO	Keratin, type I cytoskeletal 19 OS=Mus musculus GN=Krt19 PE=1 SV=1 - [K1C19_MOUSE]	7487.75	7104.24	40239	13886.8	2861.7	5148.6	6526.7	8492.73	15000.9	5817.35	46817.1	19809.3	4621.24	7858.07	6526.7	11897.5	1	0	1	1	0	0	0	1
Q61686	13	8	641.44	0.101572	1.40651	PD-L1-KO	wild type	Chromobox protein homolog 5 OS=Mus musculus GN=Cbx5 PE=1 SV=1 - [CBX5_MOUSE]	297271	338820	417224	561921	548903	737917	416954	568065	595550	277445	485430	801573	886401	1.12625e+06	416954	795802	1	2	2	2	4	2	1	2
P80313	21	20	1082.25	0.102245	1.32204	wild type	PD-L1-KO	T-complex protein 1 subunit eta OS=Mus musculus GN=Cct7 PE=1 SV=1 - [TCPH_MOUSE]	2.14962e+06	1.80145e+06	1.78542e+06	1.2345e+06	1.48914e+06	1.16877e+06	1.4913e+06	1.1237e+06	4.30653e+06	1.47513e+06	2.07729e+06	1.761e+06	2.40474e+06	1.78384e+06	1.4913e+06	1.57419e+06	10	6	11	8	11	3	8	6
Q6P6I6	1	1	30.62	0.10238	1.95688	wild type	PD-L1-KO	DNA-directed RNA polymerase II subunit GRINL1A OS=Mus musculus GN=Polr2m PE=2 SV=2 - [GRL1A_MOUSE]	17891.7	15141	18813.9	20834.9	10575.5	20248.7	1727.65	4589.73	35844.2	12398.3	21889.5	29720.8	17077.9	30904.6	1727.65	6429.75	0	0	0	1	0	0	0	0
Q60648	7	7	254.24	0.102707	1.32184	PD-L1-KO	wild type	Ganglioside GM2 activator OS=Mus musculus GN=Gm2a PE=1 SV=2 - [SAP3_MOUSE]	977273	1.40161e+06	929320	1.55659e+06	1.87532e+06	1.69863e+06	1.58416e+06	1.27234e+06	1.95786e+06	1.14771e+06	1.08124e+06	2.22045e+06	3.02837e+06	2.59254e+06	1.58416e+06	1.78243e+06	3	3	5	2	3	2	6	3
Q8K310	10	10	385.52	0.10282	1.20767	PD-L1-KO	wild type	Matrin-3 OS=Mus musculus GN=Matr3 PE=1 SV=1 - [MATR3_MOUSE]	1.01476e+06	1.16162e+06	1.33019e+06	1.15747e+06	1.56258e+06	1.4847e+06	1.47877e+06	1.10657e+06	2.03297e+06	951200	1.54764e+06	1.65112e+06	2.52335e+06	2.26602e+06	1.47877e+06	1.55019e+06	3	1	6	0	6	1	1	2
P70460	14	14	806.35	0.103507	1.25384	wild type	PD-L1-KO	Vasodilator-stimulated phosphoprotein OS=Mus musculus GN=Vasp PE=1 SV=4 - [VASP_MOUSE]	2.41483e+06	2.14968e+06	2.08606e+06	1.78779e+06	1.93594e+06	1.78809e+06	1.79753e+06	1.20847e+06	4.83785e+06	1.76028e+06	2.42708e+06	2.55027e+06	3.12627e+06	2.72908e+06	1.79753e+06	1.69294e+06	11	7	7	7	9	7	6	6
P80317	23	21	1083.06	0.103771	1.28037	wild type	PD-L1-KO	T-complex protein 1 subunit zeta OS=Mus musculus GN=Cct6a PE=1 SV=3 - [TCPZ_MOUSE]	2.5311e+06	2.67887e+06	3.0201e+06	2.01743e+06	2.35492e+06	2.11091e+06	2.05664e+06	1.48107e+06	5.07078e+06	2.19361e+06	3.51382e+06	2.87783e+06	3.80287e+06	3.22178e+06	2.05664e+06	2.07483e+06	8	9	12	6	12	8	11	5
Q9JMD0	3	3	180.58	0.103943	1.15444	PD-L1-KO	wild type	BUB3-interacting and GLEBS motif-containing protein ZNF207 OS=Mus musculus GN=Znf207 PE=2 SV=1 - [ZN207_MOUSE]	343649	375034	281802	329685	338052	390475	424313	382758	688464	307099	327869	470292	545906	595964	424313	536205	2	2	2	2	3	3	3	2
Q9JMA1	5	4	183.99	0.104265	1.43765	wild type	PD-L1-KO	Ubiquitin carboxyl-terminal hydrolase 14 OS=Mus musculus GN=Usp14 PE=1 SV=3 - [UBP14_MOUSE]	237971	260694	165307	137834	131779	183482	125840	116621	476750	213471	192331	196619	212804	280041	125840	163374	0	0	3	2	3	1	1	3
O08749	22	22	1188.09	0.10433	1.38101	wild type	PD-L1-KO	Dihydrolipoyl dehydrogenase, mitochondrial OS=Mus musculus GN=Dld PE=1 SV=2 - [DLDH_MOUSE]	3.52968e+06	3.92914e+06	3.91573e+06	2.5364e+06	2.73075e+06	2.94133e+06	2.79401e+06	1.60697e+06	7.07134e+06	3.2174e+06	4.55585e+06	3.61815e+06	4.40977e+06	4.48921e+06	2.79401e+06	2.2512e+06	12	14	10	12	14	14	17	9
P20664	2	2	86.52	0.104528	1.63166	PD-L1-KO	wild type	DNA primase small subunit OS=Mus musculus GN=Prim1 PE=1 SV=1 - [PRI1_MOUSE]	902.23	1958.48	3581.67	3012	3482.23	4769.52	3605.56	3568.99	1807.52	1603.71	4167.19	4296.58	5623.31	7279.49	3605.56	4999.79	0	0	1	1	1	1	1	1
P97465	1	1	98.45	0.104558	1.30896	wild type	PD-L1-KO	Docking protein 1 OS=Mus musculus GN=Dok1 PE=1 SV=2 - [DOK1_MOUSE]	36828.2	42951.2	48735.9	44002.7	40818.5	39707.6	28842.1	22429.1	73781.3	35170.8	56703	62769.3	65916.2	60603.8	28842.1	31420.9	1	0	0	0	0	1	1	0
Q8CIG8	1	1	37.82	0.106755	5.07969	PD-L1-KO	wild type	Protein arginine N-methyltransferase 5 OS=Mus musculus GN=Prmt5 PE=1 SV=3 - [ANM5_MOUSE]	77.15	833.855	300.8	549.643	2617.46	225.567	3094.37	3010.2	154.562	682.807	349.973	784.058	4226.83	344.272	3094.37	4216.99	0	0	0	0	1	0	0	0
P23506	6	6	318.96	0.107225	1.52878	wild type	PD-L1-KO	Protein-L-isoaspartate(D-aspartate) O-methyltransferase OS=Mus musculus GN=Pcmt1 PE=1 SV=3 - [PIMT_MOUSE]	618893	642681	428459	669139	368333	186346	550585	437907	1.23988e+06	526263	498501	954519	594805	284411	550585	613464	2	2	4	0	2	0	2	3
Q8R5A3	12	12	495.83	0.107399	1.2871	wild type	PD-L1-KO	Amyloid beta A4 precursor protein-binding family B member 1-interacting protein OS=Mus musculus GN=Apbb1ip PE=1 SV=2 - [AB1IP_MOUSE]	379238	256938	349017	247539	265833	269706	204790	217433	759762	210395	406073	353112	429282	411640	204790	304601	2	1	5	2	3	1	3	1
Q91VE0	4	4	151.51	0.107462	1.39946	wild type	PD-L1-KO	Long-chain fatty acid transport protein 4 OS=Mus musculus GN=Slc27a4 PE=1 SV=1 - [S27A4_MOUSE]	125894	104978	119707	92462.7	102977	44138.3	80338.4	89128.3	252216	85962	139276	131897	166293	67366.1	80338.4	124860	1	2	2	1	2	0	0	1
Q61881	43	43	2023.92	0.10749	1.20522	wild type	PD-L1-KO	DNA replication licensing factor MCM7 OS=Mus musculus GN=Mcm7 PE=2 SV=1 - [MCM7_MOUSE]	4.8245e+06	4.92209e+06	4.42932e+06	4.95394e+06	4.11875e+06	4.99377e+06	3.72015e+06	3.0398e+06	9.66537e+06	4.03048e+06	5.1534e+06	7.06673e+06	6.6512e+06	7.62176e+06	3.72015e+06	4.25845e+06	22	15	22	19	25	15	21	17
P50431	2	2	122.75	0.107766	1.79385	wild type	PD-L1-KO	Serine hydroxymethyltransferase, cytosolic OS=Mus musculus GN=Shmt1 PE=1 SV=3 - [GLYC_MOUSE]	87161.3	110344	77816.6	77537.4	21369.5	116954	45444.6	12936.5	174618	90355.7	90537.7	110606	34508.7	178501	45444.6	18122.7	2	2	2	2	1	1	2	0
Q61263	1	1	27.05	0.10836	3.89382	wild type	PD-L1-KO	Sterol O-acyltransferase 1 OS=Mus musculus GN=Soat1 PE=2 SV=2 - [SOAT1_MOUSE]	2586.98	1546.66	12608.7	2523.11	1296.51	1029.58	2420.58	201.036	5182.74	1266.49	14670	3599.19	2093.68	1571.4	2420.58	281.631	0	0	0	0	1	0	0	0
P45878	10	10	448.68	0.109477	1.20138	wild type	PD-L1-KO	Peptidyl-prolyl cis-trans isomerase FKBP2 OS=Mus musculus GN=Fkbp2 PE=1 SV=1 - [FKBP2_MOUSE]	886017	940105	707543	658868	628695	654908	734885	638899	1.77504e+06	769810	823209	939866	1.01525e+06	999556	734885	895033	4	6	2	3	4	3	4	1
Q9JHK5	10	10	554.61	0.109994	1.6521	wild type	PD-L1-KO	Pleckstrin OS=Mus musculus GN=Plek PE=1 SV=1 - [PLEK_MOUSE]	1.16535e+06	965441	1.02118e+06	488825	850065	437147	560540	355985	2.33466e+06	790556	1.18812e+06	697303	1.37273e+06	667197	560540	498700	9	5	8	6	8	4	6	4
O35522	4	4	280.22	0.110399	2.15812	wild type	PD-L1-KO	Proteasome subunit beta type-9 OS=Mus musculus bactrianus GN=Psmb9 PE=1 SV=1 - [PSB9_MUSMB]	299791	495566	269668	940402	262758	152984	406705	106801	600600	405797	313752	1.34147e+06	424317	233492	406705	149617	4	2	3	2	2	2	4	1
E9Q5K9	1	1	61.78	0.110598	2.05275	PD-L1-KO	wild type	YTH domain-containing protein 1 OS=Mus musculus GN=Ythdc1 PE=2 SV=2 - [YTDC1_MOUSE]	414.742	155.107	9387.39	172.216	4407.83	1151.01	8662.66	6571.77	830.89	127.01	10922	245.665	7118.02	1756.73	8662.66	9206.38	0	0	1	0	0	0	1	1
Q9Z2I0	16	16	693.45	0.110609	1.38602	wild type	PD-L1-KO	LETM1 and EF-hand domain-containing protein 1, mitochondrial OS=Mus musculus GN=Letm1 PE=2 SV=1 - [LETM1_MOUSE]	1.53569e+06	1.44536e+06	1.21702e+06	1.15453e+06	1.19365e+06	698916	1.3325e+06	636776	3.0766e+06	1.18354e+06	1.41597e+06	1.64692e+06	1.92757e+06	1.06672e+06	1.3325e+06	892059	3	4	7	2	7	1	3	2
Q9CQZ5	3	3	102.16	0.111447	2.24766	PD-L1-KO	wild type	NADH dehydrogenase [ubiquinone] 1 alpha subcomplex subunit 6 OS=Mus musculus GN=Ndufa6 PE=1 SV=1 - [NDUA6_MOUSE]	13722.9	15658.5	37262.6	3159.75	53661.3	18687.7	50287.6	34258.9	27492.3	12822.1	43354.1	4507.34	86655.4	28522.1	50287.6	47993.2	0	0	1	0	2	0	1	3
Q9WUQ2	4	4	87.43	0.112465	1.96177	wild type	PD-L1-KO	Prolactin regulatory element-binding protein OS=Mus musculus GN=Preb PE=1 SV=1 - [PREB_MOUSE]	108810	121024	85710.3	77084.2	9855.02	61014.6	69427.5	59842.7	217990	99101	99721.9	109960	15914.5	93123.7	69427.5	83833.6	1	0	0	1	0	2	2	0
Q9QYS9	2	2	101.11	0.113978	1.46287	PD-L1-KO	wild type	Protein quaking OS=Mus musculus GN=Qki PE=1 SV=1 - [QKI_MOUSE]	32324.8	74285.8	62056.1	89334	91500.8	110192	100572	75156.4	64759.2	60829.3	72200.8	127434	147761	168181	100572	105287	0	1	0	1	1	0	1	0
Q9CQD1	3	2	104.75	0.114214	1.80401	wild type	PD-L1-KO	Ras-related protein Rab-5A OS=Mus musculus GN=Rab5a PE=1 SV=1 - [RAB5A_MOUSE]	111224	117523	79131.2	105856	30739.7	86463.6	97024.4	15113.3	222825	96234.7	92067.3	151002	49640.3	131965	97024.4	21172.2	1	1	1	1	1	0	1	0
Q8BZN6	11	11	539.24	0.114362	1.43689	wild type	PD-L1-KO	Dedicator of cytokinesis protein 10 OS=Mus musculus GN=Dock10 PE=1 SV=3 - [DOC10_MOUSE]	412018	368560	529514	247312	331848	266299	274586	211142	825433	301797	616077	352788	535887	406439	274586	295788	3	1	4	1	3	3	1	2
Q8R3V5	3	2	94.71	0.114692	1.66566	wild type	PD-L1-KO	Endophilin-B2 OS=Mus musculus GN=Sh3glb2 PE=2 SV=2 - [SHLB2_MOUSE]	27525.1	26738.7	21471.7	14431.6	17766.7	8872.85	21205.2	6288.16	55143.6	21895.1	24981.7	20586.5	28690.7	13542.2	21205.2	8809.08	1	1	1	1	2	1	1	0
Q9JJ28	11	11	584.35	0.114734	1.39392	wild type	PD-L1-KO	Protein flightless-1 homolog OS=Mus musculus GN=Flii PE=1 SV=1 - [FLII_MOUSE]	658631	502129	631461	517798	549035	457564	422875	227740	1.3195e+06	411171	734690	738633	886614	698358	422875	319040	6	5	4	5	6	3	5	4
Q64514	3	3	271.52	0.115202	1.38148	wild type	PD-L1-KO	Tripeptidyl-peptidase 2 OS=Mus musculus GN=Tpp2 PE=2 SV=3 - [TPP2_MOUSE]	330883	330477	269818	222765	234371	277990	193016	129919	662889	270612	313926	317772	378476	424283	193016	182003	2	2	3	1	2	2	2	1
Q8K4I3	7	7	291.81	0.115799	1.39451	wild type	PD-L1-KO	Rho guanine nucleotide exchange factor 6 OS=Mus musculus GN=Arhgef6 PE=1 SV=1 - [ARHG6_MOUSE]	115363	112805	162913	92440.4	55207.7	98446.5	98718.9	94359.3	231117	92370.6	189545	131865	89152.6	150254	98718.9	132188	2	0	4	1	2	0	0	1
P57780	62	49	3393.74	0.117349	1.16435	wild type	PD-L1-KO	Alpha-actinin-4 OS=Mus musculus GN=Actn4 PE=1 SV=1 - [ACTN4_MOUSE]	4.03252e+06	3.8632e+06	4.04112e+06	3.4969e+06	3.81026e+06	3.61707e+06	3.17566e+06	2.65223e+06	8.07872e+06	3.1634e+06	4.70175e+06	4.98828e+06	6.15303e+06	5.52056e+06	3.17566e+06	3.71551e+06	17	12	26	17	21	20	17	15
Q61216	4	4	164.99	0.11774	1.25417	wild type	PD-L1-KO	Double-strand break repair protein MRE11A OS=Mus musculus GN=Mre11a PE=2 SV=1 - [MRE11_MOUSE]	60211.8	69918.3	66362.9	82137.9	71657.6	47397.6	59848.1	43260.8	120628	57253	77211.6	117169	115717	72340.7	59848.1	60604	0	2	1	2	2	0	1	2
P14206	18	18	901.46	0.117815	1.35109	wild type	PD-L1-KO	40S ribosomal protein SA OS=Mus musculus GN=Rpsa PE=1 SV=4 - [RSSA_MOUSE]	1.00874e+07	1.17829e+07	8.38856e+06	1.06733e+07	9.73842e+06	5.6634e+06	9.70663e+06	5.18721e+06	2.02091e+07	9.64845e+06	9.75989e+06	1.52253e+07	1.57262e+07	8.64378e+06	9.70663e+06	7.26676e+06	12	11	8	10	9	9	8	6
P63037	17	15	690.47	0.117997	1.33621	wild type	PD-L1-KO	DnaJ homolog subfamily A member 1 OS=Mus musculus GN=Dnaja1 PE=1 SV=1 - [DNJA1_MOUSE]	1.03052e+06	1.15585e+06	860975	942483	891247	567264	1.01411e+06	513311	2.06454e+06	946475	1.00172e+06	1.34444e+06	1.43924e+06	865788	1.01411e+06	719097	6	8	9	6	13	6	6	5
P16330	8	8	435.14	0.118064	1.37927	wild type	PD-L1-KO	2',3'-cyclic-nucleotide 3'-phosphodiesterase OS=Mus musculus GN=Cnp PE=1 SV=3 - [CN37_MOUSE]	858967	981047	962039	1.18944e+06	903825	671186	908638	410265	1.72085e+06	803336	1.11931e+06	1.69673e+06	1.45955e+06	1.0244e+06	908638	574740	1	4	4	4	5	3	3	2
Q9JIF0	12	11	558.71	0.11945	1.43214	PD-L1-KO	wild type	Protein arginine N-methyltransferase 1 OS=Mus musculus GN=Prmt1 PE=1 SV=1 - [ANM1_MOUSE]	370800	320732	349310	282167	410956	343315	406882	733581	742858	262633	406413	402507	663636	523986	406882	1.02767e+06	2	3	7	3	7	3	3	4
P70280	2	1	33.48	0.119509	2.32552	wild type	PD-L1-KO	Vesicle-associated membrane protein 7 OS=Mus musculus GN=Vamp7 PE=1 SV=1 - [VAMP7_MOUSE]	29402.4	29951.7	16452.5	48747.1	19887.9	1287.86	27953.2	4430.59	58904.6	24526.1	19142.1	69537.1	32116.1	1965.6	27953.2	6206.81	0	0	1	0	0	0	0	0
Q61171	11	11	484.03	0.119648	1.51389	wild type	PD-L1-KO	Peroxiredoxin-2 OS=Mus musculus GN=Prdx2 PE=1 SV=3 - [PRDX2_MOUSE]	2.87096e+06	4.28945e+06	2.77747e+06	4.03711e+06	2.06733e+06	1.60587e+06	4.20911e+06	1.34888e+06	5.75167e+06	3.51244e+06	3.23152e+06	5.75888e+06	3.33844e+06	2.45096e+06	4.20911e+06	1.88965e+06	5	4	7	5	6	3	4	2
Q61233	67	67	3635.77	0.119813	1.25275	wild type	PD-L1-KO	Plastin-2 OS=Mus musculus GN=Lcp1 PE=1 SV=4 - [PLSL_MOUSE]	3.39234e+07	2.89869e+07	2.46534e+07	2.62802e+07	2.39791e+07	2.64865e+07	2.41992e+07	1.621e+07	6.79619e+07	2.3736e+07	2.86836e+07	3.74883e+07	3.87229e+07	4.0425e+07	2.41992e+07	2.27086e+07	96	85	71	69	66	67	66	40
Q99LF4	18	18	739.02	0.119982	1.32138	wild type	PD-L1-KO	tRNA-splicing ligase RtcB homolog OS=Mus musculus GN=D10Wsu52e PE=2 SV=1 - [RTCB_MOUSE]	981947	831184	1.03897e+06	1.14593e+06	1.01117e+06	705016	824429	485043	1.96722e+06	680620	1.20881e+06	1.63466e+06	1.63289e+06	1.07603e+06	824429	679496	3	2	10	6	10	1	6	5
Q9JHE7	1	1	34.63	0.12024	2.79129	PD-L1-KO	wild type	Protein TSSC4 OS=Mus musculus GN=Tssc4 PE=2 SV=1 - [TSSC4_MOUSE]	176.294	0	1388.97	20173	22192.4	5815.21	16295.5	16374.8	353.186	0	1616.03	28776.5	35837.6	8875.48	16295.5	22939.4	0	0	0	1	0	0	0	0
P01027	1	1	45.02	0.120263	236.76	wild type	PD-L1-KO	Complement C3 OS=Mus musculus GN=C3 PE=1 SV=3 - [CO3_MOUSE]	16692.9	19.974	878.155	108945	67.5115	416.314	20.4367	30.1874	33442.5	16.3558	1021.71	155409	109.022	635.401	20.4367	42.2895	0	0	0	1	0	0	0	0
O89100	18	18	1046.42	0.120419	1.08761	PD-L1-KO	wild type	GRB2-related adaptor protein 2 OS=Mus musculus GN=Grap2 PE=1 SV=1 - [GRAP2_MOUSE]	1.82059e+06	1.68862e+06	1.91194e+06	1.56399e+06	1.84537e+06	1.98489e+06	1.92979e+06	1.83705e+06	3.64736e+06	1.38273e+06	2.2245e+06	2.231e+06	2.98001e+06	3.02945e+06	1.92979e+06	2.57353e+06	9	7	10	8	10	8	10	8
Q922B2	20	20	1087.3	0.121524	1.27846	wild type	PD-L1-KO	Aspartate--tRNA ligase, cytoplasmic OS=Mus musculus GN=Dars PE=2 SV=2 - [SYDC_MOUSE]	1.29918e+06	1.17326e+06	1.07293e+06	908514	849887	1.06566e+06	959466	608764	2.60277e+06	960733	1.24833e+06	1.29598e+06	1.37245e+06	1.62647e+06	959466	852817	13	8	14	8	12	6	9	4
Q9JKP8	3	3	140.89	0.121816	1.87387	wild type	PD-L1-KO	Chromatin accessibility complex protein 1 OS=Mus musculus GN=Chrac1 PE=1 SV=1 - [CHRC1_MOUSE]	68685.1	82661.8	76721.7	36546	16064.6	11537.8	65356.1	48254.2	137603	67688	89263.8	52132.4	25942.1	17609.6	65356.1	67599.2	1	0	2	2	2	0	1	2
A2AB59	1	1	49.85	0.121989	1.37281	wild type	PD-L1-KO	Rho GTPase-activating protein 27 OS=Mus musculus GN=Arhgap27 PE=1 SV=1 - [RHG27_MOUSE]	16904.1	19930.3	14078.5	10516	12048.6	8609.56	13640.8	10447.9	33865.6	16320	16380	15001	19456.8	13140.4	13640.8	14636.4	0	1	0	0	1	0	1	0
Q80UP3	1	1	27.84	0.122014	2.91373	wild type	PD-L1-KO	Diacylglycerol kinase zeta OS=Mus musculus GN=Dgkz PE=1 SV=2 - [DGKZ_MOUSE]	707.014	1389.09	6251.54	1567.27	2871.13	459.417	11.259	61.0206	1416.43	1137.46	7273.51	2235.68	4636.47	701.187	11.259	85.4838	0	0	1	0	0	0	0	0
Q5EBH1	3	3	128.31	0.122172	1.2576	wild type	PD-L1-KO	Ras association domain-containing protein 5 OS=Mus musculus GN=Rassf5 PE=1 SV=1 - [RASF5_MOUSE]	116759	86033.2	82903.5	83314.6	85972.2	71243.7	81263	54946	233915	70448.8	96456.3	118847	138833	108736	81263	76973.8	0	0	1	1	2	0	1	1
Q6PEB6	2	2	148.8	0.122233	2.12445	wild type	PD-L1-KO	MOB-like protein phocein OS=Mus musculus GN=Mob4 PE=1 SV=1 - [PHOCN_MOUSE]	77162.2	78412.9	86327.1	111666	90414	2382.45	71837.2	1794.28	154586	64208.8	100440	159290	146006	3636.22	71837.2	2513.6	0	0	1	0	1	0	1	0
P53811	2	1	50.74	0.122366	2.29726	wild type	PD-L1-KO	Phosphatidylinositol transfer protein beta isoform OS=Mus musculus GN=Pitpnb PE=1 SV=2 - [PIPNB_MOUSE]	62947.3	61837.6	27182.4	148107	25090.6	37507.7	47436.9	20587.2	126108	50636.1	31626.1	211272	40517.8	57246.2	47436.9	28840.6	0	0	1	0	0	0	0	0
Q80XI4	4	2	216.59	0.122472	1.60169	wild type	PD-L1-KO	Phosphatidylinositol 5-phosphate 4-kinase type-2 beta OS=Mus musculus GN=Pip4k2b PE=1 SV=1 - [PI42B_MOUSE]	49035.2	51680.3	21556.1	43220.7	22439.8	35674.6	27277.6	17931.3	98236.7	42318.7	25080	61653.8	36237	54448.5	27277.6	25120	2	1	0	1	0	0	1	0
Q00519	3	3	104.8	0.12361	4.28169	wild type	PD-L1-KO	Xanthine dehydrogenase/oxidase OS=Mus musculus GN=Xdh PE=1 SV=5 - [XDH_MOUSE]	27018.3	27609.8	57200.2	3478.99	6630.26	2794.49	12595.1	4910.48	54128.3	22608.5	66551.1	4962.74	10706.9	4265.1	12595.1	6879.09	0	0	3	1	1	0	1	1
Q9CR16	5	5	267.4	0.123725	1.22364	wild type	PD-L1-KO	Peptidyl-prolyl cis-trans isomerase D OS=Mus musculus GN=Ppid PE=1 SV=3 - [PPID_MOUSE]	297290	322778	320155	295469	257945	184590	333869	233445	595588	264308	372492	421483	416544	281731	333869	327033	2	3	3	1	4	0	2	2
Q99L47	10	10	437.84	0.123751	1.28892	wild type	PD-L1-KO	Hsc70-interacting protein OS=Mus musculus GN=St13 PE=2 SV=1 - [F10A1_MOUSE]	997306	1.01347e+06	991683	672353	904480	643712	743338	559548	1.99799e+06	829888	1.1538e+06	959103	1.46061e+06	982467	743338	783871	3	2	6	4	8	2	4	5
Q8K0V4	1	1	24.15	0.123983	2.0244	wild type	PD-L1-KO	CCR4-NOT transcription complex subunit 3 OS=Mus musculus GN=Cnot3 PE=1 SV=1 - [CNOT3_MOUSE]	4242.73	3120.6	9188.84	3317.09	581.348	6377.16	1186.12	1670.25	8499.85	2555.32	10691	4731.79	938.795	9733.16	1186.12	2339.85	0	0	0	0	0	0	0	1
Q9D8S3	1	1	20.32	0.124099	1.68715	wild type	PD-L1-KO	ADP-ribosylation factor GTPase-activating protein 3 OS=Mus musculus GN=Arfgap3 PE=2 SV=2 - [ARFG3_MOUSE]	7133.32	6756.96	3825.81	5096.85	3815.84	4757.16	1205.65	3742.93	14290.8	5532.97	4451.24	7270.59	6162.04	7260.63	1205.65	5243.47	0	0	0	0	0	0	0	1
Q9QXT0	5	5	331.97	0.124346	1.8118	PD-L1-KO	wild type	Protein canopy homolog 2 OS=Mus musculus GN=Cnpy2 PE=2 SV=1 - [CNPY2_MOUSE]	483478	638052	1.1571e+06	1.09889e+06	1.51831e+06	696276	2.12666e+06	1.77814e+06	968597	522472	1.34626e+06	1.56755e+06	2.45185e+06	1.06269e+06	2.12666e+06	2.491e+06	1	1	3	2	2	2	1	2
P50283	1	1	58.09	0.124681	2.78524	PD-L1-KO	wild type	T-cell antigen CD7 OS=Mus musculus GN=Cd7 PE=1 SV=1 - [CD7_MOUSE]	3396.36	5498.66	555.437	10851.1	7559.08	10370.5	7755.99	30859.3	6804.23	4502.61	646.237	15479	12206.8	15828	7755.99	43230.7	0	0	0	1	1	0	1	0
Q9QZ88	3	3	124.29	0.124936	1.25802	wild type	PD-L1-KO	Vacuolar protein sorting-associated protein 29 OS=Mus musculus GN=Vps29 PE=1 SV=1 - [VPS29_MOUSE]	119383	133328	116901	154496	101297	77554.1	140530	97231.1	239171	109176	136012	220386	163581	118367	140530	136211	2	2	2	1	2	0	1	2
Q99KJ8	3	3	171.39	0.125595	1.31862	PD-L1-KO	wild type	Dynactin subunit 2 OS=Mus musculus GN=Dctn2 PE=1 SV=3 - [DCTN2_MOUSE]	65486.9	64330.9	116055	92551.5	103123	141856	104506	96769	131196	52677.7	135027	132023	166528	216507	104506	135564	1	1	3	2	3	1	2	2
Q9DCE5	1	1	115.55	0.125689	1.6818	wild type	PD-L1-KO	p21-activated protein kinase-interacting protein 1 OS=Mus musculus GN=Pak1ip1 PE=2 SV=2 - [PK1IP_MOUSE]	220936	210494	96034.2	131858	92762.6	146549	102928	49794.6	442622	172364	111733	188094	149798	223670	102928	69757.3	0	1	1	1	1	1	1	0
Q8CHK3	5	5	251.03	0.126463	1.20118	wild type	PD-L1-KO	Lysophospholipid acyltransferase 7 OS=Mus musculus GN=Mboat7 PE=2 SV=1 - [MBOA7_MOUSE]	252266	215755	236572	171511	194528	201347	174224	159271	505389	176672	275245	244659	314135	307306	174224	223123	2	3	3	2	3	0	3	2
Q8K1M6	2	2	80.27	0.127535	1.40662	wild type	PD-L1-KO	Dynamin-1-like protein OS=Mus musculus GN=Dnm1l PE=1 SV=2 - [DNM1L_MOUSE]	26335.4	19797.9	21826.8	18917.1	13244.7	27289.3	10633.9	10595.4	52760.1	16211.6	25395	26985	21388.4	41650.3	10633.9	14843	0	0	1	1	1	1	0	0
Q9D820	2	2	78.36	0.127644	1.65856	PD-L1-KO	wild type	Prolyl-tRNA synthetase associated domain-containing protein 1 OS=Mus musculus GN=Prorsd1 PE=2 SV=1 - [PRXD1_MOUSE]	60080.7	98386.7	62734.8	20003.7	94188.8	87854.4	82097.6	135912	120365	80564.5	72990.4	28535	152102	134088	82097.6	190400	0	1	2	0	1	1	2	1
Q91V81	2	2	118.36	0.127724	1.60102	wild type	PD-L1-KO	RNA-binding protein 42 OS=Mus musculus GN=Rbm42 PE=1 SV=1 - [RBM42_MOUSE]	92632.9	90860.2	85645.4	96748.5	21828.2	82482	96912.7	27310.9	185580	74401.3	99646.3	138011	35249.4	125888	96912.7	38259.8	1	1	1	1	1	0	1	0
Q9D0F3	1	1	40.17	0.129569	1.30319	wild type	PD-L1-KO	Protein ERGIC-53 OS=Mus musculus GN=Lman1 PE=2 SV=1 - [LMAN1_MOUSE]	98437.2	121645	137494	86837.4	75189.8	116300	79524	70005.6	197208	99609.6	159971	123872	121421	177504	79524	98070.7	1	0	0	0	0	0	0	1
Q3UZA1	5	5	229.48	0.129779	1.34336	wild type	PD-L1-KO	CapZ-interacting protein OS=Mus musculus GN=Rcsd1 PE=2 SV=1 - [CPZIP_MOUSE]	200292	157813	255072	202463	195660	99501.7	173406	138598	401264	129226	296770	288811	315964	151865	173406	194162	0	2	4	0	5	1	3	1
Q9Z329	1	1	44.8	0.130294	1.36214	wild type	PD-L1-KO	Inositol 1,4,5-trisphosphate receptor type 2 OS=Mus musculus GN=Itpr2 PE=1 SV=4 - [ITPR2_MOUSE]	14921.7	17093.3	15620.7	15453.5	7827.29	10497.5	19982.2	8009.33	29894	13997	18174.3	22044.2	12640	16021.8	19982.2	11220.3	1	0	0	0	0	0	1	0
P83510	3	1	125.1	0.130452	1.4582	wild type	PD-L1-KO	Traf2 and NCK-interacting protein kinase OS=Mus musculus GN=Tnik PE=1 SV=2 - [TNIK_MOUSE]	19253.6	17817.2	14015.6	20210.4	9203.34	18068.6	15440.6	6181.19	38572.5	14589.7	16306.8	28829.9	14862.1	27577.3	15440.6	8659.23	1	1	0	1	0	1	1	0
Q8K2F8	1	1	44.64	0.130966	1.59538	wild type	PD-L1-KO	Protein LSM14 homolog A OS=Mus musculus GN=Lsm14a PE=1 SV=1 - [LS14A_MOUSE]	290029	188848	175352	172519	172908	52842.1	191872	100591	581042	154640	204018	246096	279222	80650.4	191872	140918	1	0	1	0	1	0	0	0
Q99LM2	2	2	134.55	0.131619	1.76767	wild type	PD-L1-KO	CDK5 regulatory subunit-associated protein 3 OS=Mus musculus GN=Cdk5rap3 PE=2 SV=1 - [CK5P3_MOUSE]	127948	134894	93704.2	161282	20363.3	96970.6	152487	23123.3	256331	110458	109023	230066	32883.9	148002	152487	32393.5	1	1	2	0	1	1	2	0
Q91YW3	10	8	505.37	0.13266	1.22575	wild type	PD-L1-KO	DnaJ homolog subfamily C member 3 OS=Mus musculus GN=Dnajc3 PE=1 SV=1 - [DNJC3_MOUSE]	399624	407387	471210	343703	376712	276338	402350	267811	800603	333591	548241	490287	608336	421762	402350	375176	3	1	5	2	4	3	4	2
Q9D2V7	14	14	608.45	0.132728	1.21742	wild type	PD-L1-KO	Coronin-7 OS=Mus musculus GN=Coro7 PE=2 SV=2 - [CORO7_MOUSE]	1.15795e+06	1.22324e+06	870805	1.07004e+06	770664	1.012e+06	1.02921e+06	738274	2.31983e+06	1.00166e+06	1.01316e+06	1.5264e+06	1.24451e+06	1.54458e+06	1.02921e+06	1.03425e+06	7	5	5	5	8	5	7	4
P07356	27	27	1708.5	0.132771	1.30846	wild type	PD-L1-KO	Annexin A2 OS=Mus musculus GN=Anxa2 PE=1 SV=2 - [ANXA2_MOUSE]	1.06401e+07	1.18453e+07	1.0555e+07	8.80813e+06	7.904e+06	1.18033e+07	6.89495e+06	5.38097e+06	2.13163e+07	9.69958e+06	1.22805e+07	1.25647e+07	1.27638e+07	1.80148e+07	6.89495e+06	7.53819e+06	24	21	21	22	20	26	20	16
Q3THG9	1	1	52.13	0.132806	2.11538	wild type	PD-L1-KO	Alanyl-tRNA editing protein Aarsd1 OS=Mus musculus GN=Aarsd1 PE=1 SV=2 - [AASD1_MOUSE]	30376.8	54004.3	33595.8	21248.3	17467.2	46114.2	406.179	1828.26	60856.6	44221.7	39087.8	30310.4	28207	70381.9	406.179	2561.21	1	0	1	0	1	1	0	0
Q9WTR1	1	1	84.87	0.132922	1.12438	PD-L1-KO	wild type	Transient receptor potential cation channel subfamily V member 2 OS=Mus musculus GN=Trpv2 PE=1 SV=2 - [TRPV2_MOUSE]	46759	53176.8	39906.1	47142.4	57409.4	50602	53683.4	48546.3	93676.6	43544.1	46429.8	67248	92708.1	77231.4	53683.4	68008.4	1	1	1	1	1	1	1	1
Q08943	11	11	540.76	0.133278	1.2921	wild type	PD-L1-KO	FACT complex subunit SSRP1 OS=Mus musculus GN=Ssrp1 PE=1 SV=2 - [SSRP1_MOUSE]	2.00682e+06	2.76192e+06	1.73041e+06	2.50157e+06	1.76143e+06	1.53929e+06	2.25733e+06	1.4079e+06	4.02044e+06	2.26162e+06	2.01329e+06	3.56845e+06	2.84445e+06	2.34934e+06	2.25733e+06	1.97232e+06	5	4	10	4	9	4	4	5
Q3UVK0	3	3	201.46	0.133622	1.69057	wild type	PD-L1-KO	Endoplasmic reticulum metallopeptidase 1 OS=Mus musculus GN=Ermp1 PE=1 SV=2 - [ERMP1_MOUSE]	206304	267933	202413	246688	181571	148951	180124	35521.7	413308	219398	235503	351897	293211	227338	180124	49762.3	1	1	2	2	1	0	0	2
P29758	11	11	485.89	0.134339	1.41203	wild type	PD-L1-KO	Ornithine aminotransferase, mitochondrial OS=Mus musculus GN=Oat PE=1 SV=1 - [OAT_MOUSE]	304411	479285	324042	448496	375014	162063	318764	246289	609855	392465	377015	639774	605594	247349	318764	345026	1	3	4	5	5	0	3	2
Q8VHQ4	1	1	32.12	0.13493	775.642	wild type	PD-L1-KO	Ras-related protein Rab-40C OS=Mus musculus GN=Rab40c PE=2 SV=1 - [RB40C_MOUSE]	39027.2	0	33060.4	226092	276.615	0	0	107.814	78186.8	0	38465	322517	446.694	0	0	151.036	2	0	1	2	0	0	0	0
Q9D8U8	4	3	167.78	0.136248	1.74171	wild type	PD-L1-KO	Sorting nexin-5 OS=Mus musculus GN=Snx5 PE=1 SV=1 - [SNX5_MOUSE]	52230.9	72894.6	53974.7	33437.4	39403.2	9399.84	41078.2	32147.2	104639	59690.1	62798.3	47698	63630.5	14346.5	41078.2	45034.9	0	1	1	0	2	0	0	0
Q9DCS2	6	6	351.94	0.136723	1.27816	wild type	PD-L1-KO	UPF0585 protein C16orf13 homolog OS=Mus musculus PE=1 SV=1 - [CP013_MOUSE]	152582	198689	161029	187900	128193	155151	174150	90324	305682	162697	187353	268037	207013	236800	174150	126535	2	2	1	1	2	1	2	3
O55131	13	11	584.82	0.137103	1.35855	wild type	PD-L1-KO	Septin-7 OS=Mus musculus GN=Sept7 PE=1 SV=1 - [SEPT7_MOUSE]	1.14925e+06	837607	883089	563921	623861	734425	657904	511409	2.3024e+06	685879	1.02745e+06	804426	1.00745e+06	1.12092e+06	657904	716433	9	3	5	4	5	2	2	4
Q64511	28	16	1458.41	0.137917	1.21613	wild type	PD-L1-KO	DNA topoisomerase 2-beta OS=Mus musculus GN=Top2b PE=1 SV=2 - [TOP2B_MOUSE]	1.16304e+06	1.39545e+06	1.11274e+06	1.24288e+06	1.21069e+06	961644	1.13684e+06	731601	2.33003e+06	1.14267e+06	1.29464e+06	1.77295e+06	1.95509e+06	1.46771e+06	1.13684e+06	1.0249e+06	7	7	11	7	12	3	10	9
P68404	2	1	102.73	0.138271	1.63559	wild type	PD-L1-KO	Protein kinase C beta type OS=Mus musculus GN=Prkcb PE=1 SV=4 - [KPCB_MOUSE]	13143.6	14989.4	9385.3	20092.5	4743.74	18927.2	3975.7	7576.71	26331.9	12274.1	10919.6	28661.7	7660.46	28887.7	3975.7	10614.2	0	0	1	1	0	0	0	0
Q99LB6	2	2	171.33	0.138753	1.32889	wild type	PD-L1-KO	Methionine adenosyltransferase 2 subunit beta OS=Mus musculus GN=Mat2b PE=2 SV=1 - [MAT2B_MOUSE]	178729	205263	150275	146573	119379	102503	198931	91523.4	358065	168081	174841	209084	192781	156445	198931	128215	2	2	2	1	2	1	2	2
Q8CG47	20	20	916.36	0.138979	1.13011	wild type	PD-L1-KO	Structural maintenance of chromosomes protein 4 OS=Mus musculus GN=Smc4 PE=1 SV=1 - [SMC4_MOUSE]	489078	454714	513653	460746	492771	455204	380322	369057	979814	372345	597623	657248	795756	694757	380322	517012	4	3	8	6	14	6	9	6
Q8R550	28	26	1374.76	0.13988	1.25593	wild type	PD-L1-KO	SH3 domain-containing kinase-binding protein 1 OS=Mus musculus GN=Sh3kbp1 PE=1 SV=1 - [SH3K1_MOUSE]	4.98668e+06	5.40827e+06	4.32386e+06	5.38156e+06	3.21934e+06	4.78073e+06	5.08288e+06	2.92144e+06	9.99027e+06	4.42859e+06	5.0307e+06	7.67673e+06	5.19877e+06	7.2966e+06	5.08288e+06	4.09264e+06	18	14	18	13	17	12	13	12
O55023	8	8	303.99	0.139977	1.20724	wild type	PD-L1-KO	Inositol monophosphatase 1 OS=Mus musculus GN=Impa1 PE=1 SV=1 - [IMPA1_MOUSE]	783378	800528	640947	603970	555868	579882	731094	476379	1.56941e+06	655516	745726	861555	897647	885047	731094	667359	4	1	4	3	5	2	3	3
Q3TVP5	2	2	207.96	0.140233	2.07273	wild type	PD-L1-KO	Inactive ubiquitin thioesterase FAM105A OS=Mus musculus GN=Fam105a PE=2 SV=1 - [F105A_MOUSE]	62011.7	80757	53465.7	136464	52803.2	32447.7	68857.1	6404.63	124234	66128.3	62206	194665	85269.6	49523.4	68857.1	8972.24	0	0	1	0	1	0	1	0
P24527	15	15	834.81	0.140909	1.22265	wild type	PD-L1-KO	Leukotriene A-4 hydrolase OS=Mus musculus GN=Lta4h PE=1 SV=4 - [LKHA4_MOUSE]	1.04252e+06	1.02932e+06	992751	828968	766538	966129	882952	568901	2.08857e+06	842867	1.15504e+06	1.18251e+06	1.23785e+06	1.47456e+06	882952	796973	6	5	10	8	11	11	8	4
Q99LL5	2	2	78.92	0.141056	1.81339	wild type	PD-L1-KO	Periodic tryptophan protein 1 homolog OS=Mus musculus GN=Pwp1 PE=1 SV=1 - [PWP1_MOUSE]	14724.5	19950.5	19604.7	15842.5	15401.8	1440.61	18473.1	3353.57	29498.9	16336.6	22809.6	22599.2	24871.8	2198.74	18473.1	4698.01	0	1	1	0	0	0	0	0
Q9Z2I8	10	9	607.79	0.142273	1.12678	wild type	PD-L1-KO	Succinyl-CoA ligase [GDP-forming] subunit beta, mitochondrial OS=Mus musculus GN=Suclg2 PE=2 SV=3 - [SUCB2_MOUSE]	406748	365131	389226	330030	377482	314782	339956	291144	814875	298989	452855	470783	609581	480436	339956	407864	2	3	5	3	5	2	3	1
Q6P5F9	2	2	117.71	0.142364	1.38974	wild type	PD-L1-KO	Exportin-1 OS=Mus musculus GN=Xpo1 PE=1 SV=1 - [XPO1_MOUSE]	135893	98965.7	125810	176874	110446	125772	91926.8	58646.5	272247	81038.6	146377	252308	178355	191960	91926.8	82157.8	2	1	1	1	1	0	0	1
Q9DC51	13	5	643.03	0.143094	1.67312	wild type	PD-L1-KO	Guanine nucleotide-binding protein G(k) subunit alpha OS=Mus musculus GN=Gnai3 PE=1 SV=3 - [GNAI3_MOUSE]	675268	892132	653176	435910	565433	526550	129409	366350	1.35283e+06	730527	759955	621820	913093	803648	129409	513219	3	2	4	1	3	1	3	0
P42082	1	1	41.1	0.143281	1.38641	wild type	PD-L1-KO	T-lymphocyte activation antigen CD86 OS=Mus musculus GN=Cd86 PE=2 SV=1 - [CD86_MOUSE]	28338.5	34646.5	31453.2	23220.2	27131.6	19080.3	27207	11446.3	56773.1	28370.5	36595	33123.3	43813.7	29121.4	27207	16035.1	0	0	1	1	1	0	1	0
Q07076	4	4	378	0.143913	1.33578	wild type	PD-L1-KO	Annexin A7 OS=Mus musculus GN=Anxa7 PE=2 SV=2 - [ANXA7_MOUSE]	706258	700651	451385	675688	337118	642467	528905	388513	1.41491e+06	573731	525176	963861	544397	980567	528905	544267	4	4	4	4	3	5	4	2
P84091	4	4	136.71	0.14464	1.25252	PD-L1-KO	wild type	AP-2 complex subunit mu OS=Mus musculus GN=Ap2m1 PE=1 SV=1 - [AP2M1_MOUSE]	157410	195399	136892	167217	147456	233992	217836	223522	315354	160003	159270	238533	238120	357130	217836	313132	2	0	3	0	1	1	2	0
P16951	1	1	38.08	0.145482	1.36075	wild type	PD-L1-KO	Cyclic AMP-dependent transcription factor ATF-2 OS=Mus musculus GN=Atf2 PE=1 SV=2 - [ATF2_MOUSE]	8876.53	7764.43	11582.5	5479.13	6336.49	6989.92	6143.9	5297.42	17783.2	6357.95	13475.9	7815.9	10232.5	10668.4	6143.9	7421.15	0	0	0	0	0	0	0	0
P62876	1	1	46.84	0.145751	2.13645	PD-L1-KO	wild type	DNA-directed RNA polymerases I, II, and III subunit RPABC5 OS=Mus musculus GN=Polr2l PE=2 SV=1 - [RPAB5_MOUSE]	14057.8	11901.3	1021.1	5640.64	20980.1	8338.36	22658.9	17715.3	28163.2	9745.41	1188.03	8046.29	33879.9	12726.4	22658.9	24817.4	0	0	0	1	1	0	1	0
P01872	3	3	199.72	0.145932	2.84356	wild type	PD-L1-KO	Ig mu chain C region secreted form OS=Mus musculus GN=Igh-6 PE=1 SV=2 - [IGHM_MOUSE]	28922.8	146777	28846.4	23132.5	19343.7	24492	16646.3	19586.2	57943.7	120189	33562	32998.2	31237.3	37380.9	16646.3	27438.3	0	2	1	0	0	0	0	1
P27641	4	4	167.6	0.145945	1.32397	wild type	PD-L1-KO	X-ray repair cross-complementing protein 5 OS=Mus musculus GN=Xrcc5 PE=2 SV=4 - [XRCC5_MOUSE]	172486	137296	112015	111385	93335.9	84391.5	148045	76944.2	345558	112426	130327	158890	150724	128803	148045	107791	1	1	2	2	2	1	3	0
Q8R480	4	4	184.61	0.146809	1.46478	PD-L1-KO	wild type	Nuclear pore complex protein Nup85 OS=Mus musculus GN=Nup85 PE=1 SV=1 - [NUP85_MOUSE]	2922.92	5690.42	7714.99	10935.7	10311.2	8629.29	11889.9	9105.58	5855.76	4659.63	8976.2	15599.7	16651.1	13170.5	11889.9	12756	0	1	1	2	1	1	2	1
P24063	32	32	1524.17	0.146885	1.30025	wild type	PD-L1-KO	Integrin alpha-L OS=Mus musculus GN=Itgal PE=1 SV=2 - [ITAL_MOUSE]	3.13901e+06	2.8085e+06	2.77598e+06	1.81607e+06	2.11741e+06	2.17141e+06	2.30149e+06	1.51546e+06	6.28866e+06	2.29976e+06	3.22978e+06	2.59061e+06	3.41932e+06	3.31413e+06	2.30149e+06	2.12301e+06	21	9	19	10	15	13	12	9
Q99L04	4	4	161.56	0.147014	2.47687	PD-L1-KO	wild type	Dehydrogenase/reductase SDR family member 1 OS=Mus musculus GN=Dhrs1 PE=2 SV=1 - [DHRS1_MOUSE]	78671.5	71595.5	50745.2	92909	98388.6	231483	57422.6	340711	157610	58626.4	59040.8	132533	158884	353302	57422.6	477302	0	1	1	0	2	0	1	0
Q6P5D8	29	29	1262.49	0.147848	1.14825	wild type	PD-L1-KO	Structural maintenance of chromosomes flexible hinge domain-containing protein 1 OS=Mus musculus GN=Smchd1 PE=1 SV=2 - [SMHD1_MOUSE]	1.07181e+06	1.08549e+06	1.14755e+06	880625	1.02192e+06	963641	885719	773793	2.14725e+06	888860	1.33514e+06	1.2562e+06	1.65026e+06	1.47076e+06	885719	1.08401e+06	10	7	15	12	13	9	11	11
P43404	7	7	412.69	0.148472	1.33716	wild type	PD-L1-KO	Tyrosine-protein kinase ZAP-70 OS=Mus musculus GN=Zap70 PE=1 SV=3 - [ZAP70_MOUSE]	292615	257389	403324	324192	233186	359411	201510	161295	586222	210765	469258	462455	376562	548552	201510	225957	3	2	5	2	4	3	2	3
Q8BT60	1	1	24.36	0.14942	2.38791	wild type	PD-L1-KO	Copine-3 OS=Mus musculus GN=Cpne3 PE=1 SV=2 - [CPNE3_MOUSE]	19710.2	23830.8	7358.11	29745	6022.85	450.745	21642.8	5655.52	39487.2	19514	8560.98	42430.8	9726.05	687.95	21642.8	7922.81	0	1	0	0	0	0	0	0
Q9WVK4	2	2	46.49	0.150091	11.3586	wild type	PD-L1-KO	EH domain-containing protein 1 OS=Mus musculus GN=Ehd1 PE=1 SV=1 - [EHD1_MOUSE]	674.269	776.282	29442.5	1113.79	54.1949	2262.21	146.682	354.767	1350.83	635.662	34255.6	1588.81	87.517	3452.7	146.682	496.993	0	0	2	0	0	0	0	0
Q8CGF7	12	12	340.61	0.151	1.36668	PD-L1-KO	wild type	Transcription elongation regulator 1 OS=Mus musculus GN=Tcerg1 PE=1 SV=2 - [TCRG1_MOUSE]	89487	125206	178835	242862	254581	194849	229961	190351	179278	102526	208071	346439	411112	297389	229961	266662	1	1	5	6	10	1	5	3
Q91V61	9	7	458.22	0.151662	1.19645	wild type	PD-L1-KO	Sideroflexin-3 OS=Mus musculus GN=Sfxn3 PE=1 SV=1 - [SFXN3_MOUSE]	1.07643e+06	1.17601e+06	861528	889863	754687	915833	980523	695376	2.1565e+06	962983	1.00237e+06	1.26938e+06	1.21871e+06	1.39779e+06	980523	974151	1	1	4	4	3	0	2	2
Q91WU5	1	1	32.24	0.152208	2.25809	wild type	PD-L1-KO	Arsenite methyltransferase OS=Mus musculus GN=As3mt PE=2 SV=2 - [AS3MT_MOUSE]	25376.7	12563.3	1935.38	18750.3	23291.4	1105.64	779.583	785.859	50839.5	10287.5	2251.76	26747.1	37612.3	1687.49	779.583	1100.91	0	0	1	1	0	0	0	0
G5E870	9	9	311.91	0.152406	1.61851	wild type	PD-L1-KO	E3 ubiquitin-protein ligase TRIP12 OS=Mus musculus GN=Trip12 PE=1 SV=1 - [TRIPC_MOUSE]	212487	271459	229043	97813.1	159821	80865.5	146967	113302	425694	222286	266485	139529	258089	123421	146967	158724	2	2	2	2	3	1	3	2
Q61122	2	2	180.58	0.152743	1.72766	wild type	PD-L1-KO	NGFI-A-binding protein 1 OS=Mus musculus GN=Nab1 PE=1 SV=2 - [NAB1_MOUSE]	44008.9	57635.7	41515.5	58784.9	10829.4	69716.6	32432.4	3910.94	88167.1	47195.3	48302.3	83855.9	17488	106405	32432.4	5478.84	1	1	1	0	0	1	1	0
P83741	1	1	25.97	0.15302	5.02576	wild type	PD-L1-KO	Serine/threonine-protein kinase WNK1 OS=Mus musculus GN=Wnk1 PE=1 SV=2 - [WNK1_MOUSE]	7361.92	6664.41	11385.3	6280.34	0	1463.37	2843.05	1999.49	14748.8	5457.19	13246.5	8958.83	0	2233.47	2843.05	2801.08	0	0	1	0	0	0	0	0
Q8K3Z9	2	2	96.42	0.153065	1.35438	PD-L1-KO	wild type	Nuclear envelope pore membrane protein POM 121 OS=Mus musculus GN=Pom121 PE=1 SV=2 - [PO121_MOUSE]	23006.1	33408	15697.9	32963.9	35797	45712.3	29179.8	31623.7	46090.3	27356.3	18264.1	47022.5	57807	69768.5	29179.8	44301.6	0	1	0	2	2	2	0	1
Q9Z1N5	21	10	1035.19	0.153071	1.36282	wild type	PD-L1-KO	Spliceosome RNA helicase Ddx39b OS=Mus musculus GN=Ddx39b PE=1 SV=1 - [DX39B_MOUSE]	2.15778e+06	1.78526e+06	1.37663e+06	2.23176e+06	1.37571e+06	1.87459e+06	1.45995e+06	830781	4.32288e+06	1.46187e+06	1.60167e+06	3.18358e+06	2.22157e+06	2.8611e+06	1.45995e+06	1.16384e+06	7	4	7	6	8	4	5	3
Q8BV49	22	18	1241.89	0.153076	1.33808	wild type	PD-L1-KO	Pyrin and HIN domain-containing protein 1 OS=Mus musculus GN=Pyhin1 PE=2 SV=1 - [IFIX_MOUSE]	5.73898e+06	6.97389e+06	5.4335e+06	5.61863e+06	5.05071e+06	2.8369e+06	6.79658e+06	3.07626e+06	1.14974e+07	5.7106e+06	6.32174e+06	8.0149e+06	8.15618e+06	4.32983e+06	6.79658e+06	4.30954e+06	13	10	10	10	14	7	12	9
P09405	56	56	2814.26	0.153235	1.2329	PD-L1-KO	wild type	Nucleolin OS=Mus musculus GN=Ncl PE=1 SV=2 - [NUCL_MOUSE]	1.2114e+07	1.33888e+07	9.85541e+06	1.91481e+07	1.74764e+07	1.83659e+07	1.53188e+07	1.60399e+07	2.4269e+07	1.09635e+07	1.14665e+07	2.73145e+07	2.82219e+07	2.8031e+07	1.53188e+07	2.24702e+07	24	27	30	33	39	37	29	34
P17427	1	1	22.43	0.153258	1.56057	wild type	PD-L1-KO	AP-2 complex subunit alpha-2 OS=Mus musculus GN=Ap2a2 PE=1 SV=2 - [AP2A2_MOUSE]	9751.27	9879.54	4941.03	9374.26	0	12712.3	9040.11	0	19535.6	8089.91	5748.77	13372.3	0	19402.2	9040.11	0	0	1	0	0	0	0	0	0
O08756	8	8	348.15	0.153843	1.77304	wild type	PD-L1-KO	3-hydroxyacyl-CoA dehydrogenase type-2 OS=Mus musculus GN=Hsd17b10 PE=1 SV=4 - [HCD2_MOUSE]	635330	628306	274674	565222	358610	96022.4	637271	94495.2	1.27281e+06	514492	319576	806283	579105	146555	637271	132378	3	2	5	3	3	1	4	2
Q9D3G5	2	2	110.08	0.154275	1.37914	wild type	PD-L1-KO	Syntaxin-11 OS=Mus musculus GN=Stx11 PE=2 SV=1 - [STX11_MOUSE]	49693.8	71944.5	42590.7	59832.8	44415.3	24039.9	56874.4	37135.3	99556.2	58912.1	49553.2	85350.7	71724.4	36691	56874.4	52022.8	1	0	1	1	1	1	0	1
Q9D0G0	3	3	109.3	0.154409	1.13266	wild type	PD-L1-KO	28S ribosomal protein S30, mitochondrial OS=Mus musculus GN=Mrps30 PE=2 SV=1 - [RT30_MOUSE]	82628.1	73296	70143.1	68728.9	74580.4	70342.6	58879.1	56465.9	165536	60018.8	81609.8	98040.9	120437	107361	58879.1	79103.1	1	0	1	1	3	1	1	1
Q8K3C3	1	1	22.33	0.154452	1.42362	PD-L1-KO	wild type	Protein LZIC OS=Mus musculus GN=Lzic PE=1 SV=1 - [LZIC_MOUSE]	25641.2	59241.1	67674	61830.6	71682.4	71643.6	99818.5	62059.9	51369.3	48509.9	78737	88200.6	115757	109346	99818.5	86939.7	0	0	0	0	1	0	0	0
Q920Q6	1	1	27.43	0.154644	1.58292	wild type	PD-L1-KO	RNA-binding protein Musashi homolog 2 OS=Mus musculus GN=Msi2 PE=1 SV=1 - [MSI2H_MOUSE]	102925	108268	85948.1	74789.3	51836	84230.7	81260.2	17637.4	206200	88655.8	99998.5	106686	83707.7	128557	81260.2	24708.3	0	0	0	0	0	0	1	0
P62334	11	11	445.29	0.154768	1.25229	wild type	PD-L1-KO	26S protease regulatory subunit 10B OS=Mus musculus GN=Psmc6 PE=1 SV=1 - [PRS10_MOUSE]	590166	460910	534395	559324	582567	325809	480496	323825	1.18233e+06	377419	621756	797868	940763	497267	480496	453646	2	1	4	2	4	2	4	3
P62702	21	21	982.12	0.155909	1.31349	wild type	PD-L1-KO	40S ribosomal protein S4, X isoform OS=Mus musculus GN=Rps4x PE=2 SV=2 - [RS4X_MOUSE]	3.06888e+06	2.20059e+06	2.95894e+06	1.96859e+06	2.66529e+06	1.37358e+06	1.88997e+06	1.83446e+06	6.14817e+06	1.80196e+06	3.44266e+06	2.80817e+06	4.30406e+06	2.09643e+06	1.88997e+06	2.56989e+06	9	9	13	12	12	8	9	6
Q60749	2	2	123.63	0.155985	1.64985	wild type	PD-L1-KO	KH domain-containing, RNA-binding, signal transduction-associated protein 1 OS=Mus musculus GN=Khdrbs1 PE=1 SV=2 - [KHDR1_MOUSE]	17117.7	8616.55	34772.6	21618.4	41540.9	3567.72	1400.58	3268.31	34293.4	7055.71	40457.1	30838.4	67082.7	5445.25	1400.58	4578.58	1	0	1	0	1	0	0	0
P86176	1	1	50.08	0.156247	1.31337	wild type	PD-L1-KO	T-cell immunoreceptor with Ig and ITIM domains OS=Mus musculus GN=Tigit PE=3 SV=1 - [TIGIT_MOUSE]	20083.9	21086.8	25789.8	21887.9	14636	27882.9	11136.5	13993.7	40236	17267	30005.8	31222.9	23635.1	42556.4	11136.5	19603.8	0	0	1	1	1	0	1	0
Q9EQ06	1	1	69.69	0.156998	14.5924	PD-L1-KO	wild type	Estradiol 17-beta-dehydrogenase 11 OS=Mus musculus GN=Hsd17b11 PE=2 SV=1 - [DHB11_MOUSE]	219.041	261.382	2352.09	828.531	1077.15	1086.14	49299.1	1961.17	438.825	214.034	2736.6	1181.89	1739.44	1657.72	49299.1	2747.4	0	0	0	0	0	0	1	0
Q80ZV0	5	5	163.66	0.157077	1.47808	wild type	PD-L1-KO	Ribonuclease H2 subunit B OS=Mus musculus GN=Rnaseh2b PE=1 SV=2 - [RNH2B_MOUSE]	267593	359800	242179	235833	244964	77881.7	263733	161287	536093	294625	281769	336413	395582	118867	263733	225947	1	0	1	1	3	1	3	2
Q3U9G9	20	20	1079.13	0.158422	1.22223	wild type	PD-L1-KO	Lamin-B receptor OS=Mus musculus GN=Lbr PE=1 SV=2 - [LBR_MOUSE]	2.25572e+06	2.58821e+06	2.25032e+06	2.0675e+06	1.40212e+06	1.70733e+06	2.6241e+06	1.76236e+06	4.5191e+06	2.11937e+06	2.61819e+06	2.94927e+06	2.26423e+06	2.60582e+06	2.6241e+06	2.46888e+06	8	9	11	7	10	10	9	9
P54103	3	3	122.66	0.158692	1.65737	wild type	PD-L1-KO	DnaJ homolog subfamily C member 2 OS=Mus musculus GN=Dnajc2 PE=1 SV=2 - [DNJC2_MOUSE]	102938	87811.9	94043.9	40863.3	36498.1	23251.1	91187.8	45553.3	206225	71905.3	109418	58291	58939.2	35487.1	91187.8	63815.6	2	0	2	0	1	0	1	0
Q08288	4	4	105.62	0.159093	2.20786	PD-L1-KO	wild type	Cell growth-regulating nucleolar protein OS=Mus musculus GN=Lyar PE=1 SV=2 - [LYAR_MOUSE]	536.835	11819.7	13358.2	27708.5	32078.7	38095.9	26541.2	21234.9	1075.49	9678.61	15541.9	39525.8	51802.6	58144	26541.2	29748	0	0	0	1	1	0	0	2
Q9WUN2	1	1	70.49	0.159676	3.13925	wild type	PD-L1-KO	Serine/threonine-protein kinase TBK1 OS=Mus musculus GN=Tbk1 PE=1 SV=1 - [TBK1_MOUSE]	11458.4	11299.6	21520.6	14066.8	0	15062.8	2644.7	878.272	22955.7	9252.7	25038.7	20066.2	0	22989.7	2644.7	1230.37	0	0	1	1	0	0	0	0
Q9QYJ0	13	13	405.21	0.159907	1.32485	wild type	PD-L1-KO	DnaJ homolog subfamily A member 2 OS=Mus musculus GN=Dnaja2 PE=1 SV=1 - [DNJA2_MOUSE]	995743	1.06371e+06	1.22759e+06	1.19969e+06	1.34564e+06	723669	826919	490360	1.99486e+06	871021	1.42827e+06	1.71135e+06	2.17302e+06	1.1045e+06	826919	686945	2	2	3	4	4	4	1	1
O35309	11	11	370.76	0.160175	1.32339	wild type	PD-L1-KO	N-myc-interactor OS=Mus musculus GN=Nmi PE=2 SV=1 - [NMI_MOUSE]	735022	904686	856756	1.09241e+06	821312	500887	940172	449511	1.47254e+06	740807	996814	1.55831e+06	1.3263e+06	764480	940172	629719	4	3	7	5	4	3	6	4
Q99LX0	10	10	557.47	0.160209	1.28841	wild type	PD-L1-KO	Protein DJ-1 OS=Mus musculus GN=Park7 PE=1 SV=1 - [PARK7_MOUSE]	2.19487e+06	2.17578e+06	1.80131e+06	1.62441e+06	1.50121e+06	1.31932e+06	2.21486e+06	1.01578e+06	4.39719e+06	1.78165e+06	2.09579e+06	2.31719e+06	2.42423e+06	2.01361e+06	2.21486e+06	1.423e+06	10	11	11	11	8	7	13	5
Q922D4	2	2	163.04	0.160223	2.37635	wild type	PD-L1-KO	Serine/threonine-protein phosphatase 6 regulatory subunit 3 OS=Mus musculus GN=Ppp6r3 PE=1 SV=1 - [PP6R3_MOUSE]	57052.9	16646.2	71523.3	17330.8	45060.1	15736.2	1732.95	5875.26	114299	13630.9	83215.6	24722.1	72765.7	24017.4	1732.95	8230.65	0	0	2	0	1	0	0	0
Q91YK2	2	2	92.56	0.160582	1.3795	PD-L1-KO	wild type	Ribosomal RNA processing protein 1 homolog B OS=Mus musculus GN=Rrp1b PE=2 SV=2 - [RRP1B_MOUSE]	64978.5	57674.2	68151.8	85154.7	87873.9	145568	71742.4	75500	130177	47226.8	79292.9	121472	141904	222174	71742.4	105768	0	0	0	0	2	0	0	0
Q8R0F6	1	1	44.91	0.160707	1.93196	PD-L1-KO	wild type	Integrin-linked kinase-associated serine/threonine phosphatase 2C OS=Mus musculus GN=Ilkap PE=2 SV=1 - [ILKAP_MOUSE]	50.3282	0	11392.5	527.815	10401	619.925	8097.96	4007.8	100.827	0	13254.9	752.922	16796.2	946.162	8097.96	5614.52	0	0	1	0	0	0	1	0
Q03267	5	4	288.21	0.161092	2.21302	wild type	PD-L1-KO	DNA-binding protein Ikaros OS=Mus musculus GN=Ikzf1 PE=1 SV=2 - [IKZF1_MOUSE]	129934	130226	512381	329609	134842	42627.2	220206	100355	260309	106636	596142	470184	217750	65059.9	220206	140588	1	1	3	2	3	0	2	2
P55302	2	2	76.38	0.162461	1.84357	PD-L1-KO	wild type	Alpha-2-macroglobulin receptor-associated protein OS=Mus musculus GN=Lrpap1 PE=1 SV=1 - [AMRP_MOUSE]	1351.31	4679.05	15465.4	13577.3	21896.2	9586.79	16005.3	17171.6	2707.2	3831.46	17993.7	19367.9	35359.3	14631.9	16005.3	24055.6	0	0	2	0	2	1	1	1
P26369	13	13	682.71	0.162507	1.40782	wild type	PD-L1-KO	Splicing factor U2AF 65 kDa subunit OS=Mus musculus GN=U2af2 PE=1 SV=3 - [U2AF2_MOUSE]	2.88073e+06	3.27898e+06	1.83123e+06	3.73214e+06	1.83004e+06	2.41796e+06	2.68292e+06	1.39621e+06	5.77123e+06	2.68501e+06	2.13059e+06	5.32384e+06	2.95525e+06	3.69042e+06	2.68292e+06	1.95595e+06	8	7	6	5	4	6	9	4
Q61792	12	11	530.73	0.162564	1.25528	wild type	PD-L1-KO	LIM and SH3 domain protein 1 OS=Mus musculus GN=Lasp1 PE=1 SV=1 - [LASP1_MOUSE]	2.01527e+06	2.43082e+06	1.59052e+06	2.37569e+06	1.51006e+06	2.23336e+06	1.60489e+06	1.35324e+06	4.03737e+06	1.99049e+06	1.85053e+06	3.38889e+06	2.43853e+06	3.40867e+06	1.60489e+06	1.89575e+06	3	4	4	3	4	9	3	4
Q9JLJ2	9	9	424.4	0.162605	1.21784	wild type	PD-L1-KO	4-trimethylaminobutyraldehyde dehydrogenase OS=Mus musculus GN=Aldh9a1 PE=1 SV=1 - [AL9A1_MOUSE]	482053	602283	449446	496646	479826	472816	422817	291778	965741	493182	522920	708459	774851	721636	422817	408752	3	2	4	2	5	2	3	3
P24452	10	10	585.62	0.163465	1.38011	wild type	PD-L1-KO	Macrophage-capping protein OS=Mus musculus GN=Capg PE=1 SV=2 - [CAPG_MOUSE]	2.03728e+06	2.75048e+06	1.41651e+06	2.91357e+06	1.64692e+06	1.61745e+06	2.00528e+06	1.33695e+06	4.08147e+06	2.25224e+06	1.64808e+06	4.15618e+06	2.65955e+06	2.46863e+06	2.00528e+06	1.87294e+06	6	6	7	6	6	5	3	5
Q9JIY5	1	1	50.11	0.163651	1.91833	PD-L1-KO	wild type	Serine protease HTRA2, mitochondrial OS=Mus musculus GN=Htra2 PE=1 SV=2 - [HTRA2_MOUSE]	8115.64	8813.54	2166.57	16952.5	17778.1	17630.6	25992.2	7751.65	16258.8	7217.02	2520.75	24182.5	28709.1	26908.7	25992.2	10859.3	0	0	0	0	0	0	0	1
Q62241	1	1	36.17	0.16388	1.7888	PD-L1-KO	wild type	U1 small nuclear ribonucleoprotein C OS=Mus musculus GN=Snrpc PE=2 SV=1 - [RU1C_MOUSE]	33265.7	12622.3	34777.2	8063.64	39885.1	56136.1	44014	18683.1	66644.3	10335.8	40462.5	11502.7	64408.8	85677.9	44014	26173.2	0	0	0	0	1	0	0	0
P17897	1	1	64.86	0.164713	2.68362	wild type	PD-L1-KO	Lysozyme C-1 OS=Mus musculus GN=Lyz1 PE=1 SV=1 - [LYZ1_MOUSE]	14450	22136.3	46993.1	19591.5	72.8919	25233.2	5616.92	7521.71	28949	18126.5	54675.3	27947	117.71	38512.3	5616.92	10537.2	1	0	0	0	0	0	1	0
O08547	6	6	389.72	0.164903	1.2249	wild type	PD-L1-KO	Vesicle-trafficking protein SEC22b OS=Mus musculus GN=Sec22b PE=1 SV=3 - [SC22B_MOUSE]	789767	725013	530147	654092	605775	528655	651549	417476	1.58221e+06	593681	616813	933053	978240	806861	651549	584841	4	6	4	4	4	3	3	4
Q3UMR5	1	1	22	0.165182	10.0562	PD-L1-KO	wild type	Calcium uniporter protein, mitochondrial OS=Mus musculus GN=Mcu PE=2 SV=2 - [MCU_MOUSE]	232.009	0	55.0992	797.174	9594.3	781.892	234.707	292.869	464.806	0	64.1066	1137.16	15493.4	1193.36	234.707	410.28	0	0	0	0	1	0	0	0
Q9D8T2	1	1	30.54	0.166168	1.45835	wild type	PD-L1-KO	Gasdermin-D OS=Mus musculus GN=Gsdmdc1 PE=2 SV=1 - [GSDMD_MOUSE]	17631.1	20995.2	15730.6	33827.8	12053	19491.9	18879.8	10044.2	35322	17192	18302.1	48255	19463.9	29749.5	18879.8	14070.9	0	0	0	1	0	0	0	0
Q91YJ3	1	1	45.73	0.166209	1.30725	wild type	PD-L1-KO	Thymocyte nuclear protein 1 OS=Mus musculus GN=Thyn1 PE=1 SV=1 - [THYN1_MOUSE]	14704.3	18860.3	12395.6	11356.9	8621.46	11809.6	14926.9	8487.51	29458.6	15443.9	14422	16200.5	13922.4	18024.4	14926.9	11890.2	1	1	0	0	1	1	1	1
Q62137	1	1	29.37	0.166221	3.79182	PD-L1-KO	wild type	Tyrosine-protein kinase JAK3 OS=Mus musculus GN=Jak3 PE=1 SV=2 - [JAK3_MOUSE]	0	630.334	1931.48	247.868	2855.3	801.786	1917.74	5079	0	516.153	2247.23	353.581	4610.9	1223.73	1917.74	7115.16	0	0	0	0	0	0	1	0
P70224	3	3	128.94	0.166276	1.5856	wild type	PD-L1-KO	GTPase IMAP family member 1 OS=Mus musculus GN=Gimap1 PE=1 SV=3 - [GIMA1_MOUSE]	226131	245918	146147	134527	177505	98494	155717	43008.7	453029	201371	170039	191901	286646	150327	155717	60250.9	1	2	1	1	1	1	1	0
O35892	15	15	701.75	0.16672	1.17588	wild type	PD-L1-KO	Nuclear autoantigen Sp-100 OS=Mus musculus GN=Sp100 PE=1 SV=2 - [SP100_MOUSE]	3.37238e+06	3.58087e+06	3.03383e+06	3.63702e+06	2.74896e+06	3.07492e+06	3.57561e+06	2.18678e+06	6.75619e+06	2.93222e+06	3.52978e+06	5.18817e+06	4.43918e+06	4.69311e+06	3.57561e+06	3.06345e+06	8	5	6	5	9	7	7	7
Q78ZA7	13	7	626.01	0.166921	1.41609	wild type	PD-L1-KO	Nucleosome assembly protein 1-like 4 OS=Mus musculus GN=Nap1l4 PE=1 SV=1 - [NP1L4_MOUSE]	959811	948227	949155	1.18135e+06	709634	1.31404e+06	512271	315953	1.92288e+06	776461	1.10432e+06	1.68519e+06	1.14596e+06	2.00555e+06	512271	442619	2	1	3	4	3	3	4	2
P15307	3	3	111.92	0.167251	1.24777	wild type	PD-L1-KO	Proto-oncogene c-Rel OS=Mus musculus GN=Rel PE=1 SV=2 - [REL_MOUSE]	72839.5	88564.7	88143.2	71846.9	66384.2	83591.4	65918.3	41680.2	145926	72521.7	102552	102489	107201	127582	65918.3	58389.7	0	3	2	2	2	2	1	1
P11983	25	25	1128.35	0.1673	1.17521	wild type	PD-L1-KO	T-complex protein 1 subunit alpha OS=Mus musculus GN=Tcp1 PE=1 SV=3 - [TCPA_MOUSE]	4.66276e+06	3.95973e+06	3.96184e+06	3.66834e+06	3.78757e+06	3.69504e+06	3.78726e+06	2.55968e+06	9.34134e+06	3.24245e+06	4.6095e+06	5.23284e+06	6.11638e+06	5.63957e+06	3.78726e+06	3.58586e+06	14	8	16	9	15	7	9	10
P29595	2	2	108.58	0.167799	1.44577	PD-L1-KO	wild type	NEDD8 OS=Mus musculus GN=Nedd8 PE=1 SV=2 - [NEDD8_MOUSE]	220154	300664	377811	343812	455284	387345	672297	281359	441054	246201	439573	490443	735220	591186	672297	394156	1	1	1	2	2	1	2	2
Q5SFM8	5	4	225.81	0.168508	1.38677	PD-L1-KO	wild type	RNA-binding protein 27 OS=Mus musculus GN=Rbm27 PE=2 SV=3 - [RBM27_MOUSE]	18440.9	34342.3	29711.4	37523.1	52619.3	27014.7	42476.3	44327.1	36944.3	28121.4	34568.5	53526.3	84972.7	41231.2	42476.3	62097.9	0	0	0	1	1	1	1	1
O88342	40	38	2214.72	0.169089	1.29629	wild type	PD-L1-KO	WD repeat-containing protein 1 OS=Mus musculus GN=Wdr1 PE=1 SV=3 - [WDR1_MOUSE]	1.09729e+07	1.2624e+07	1.01831e+07	1.04808e+07	8.173e+06	1.03675e+07	1.08413e+07	4.76241e+06	2.19831e+07	1.03372e+07	1.18478e+07	1.49507e+07	1.31982e+07	1.58235e+07	1.08413e+07	6.67166e+06	31	25	27	22	21	26	26	10
O55135	11	11	611.05	0.169303	1.3588	wild type	PD-L1-KO	Eukaryotic translation initiation factor 6 OS=Mus musculus GN=Eif6 PE=1 SV=2 - [IF6_MOUSE]	1.50074e+06	1.71115e+06	1.49264e+06	2.39381e+06	1.52126e+06	781070	1.80447e+06	1.11717e+06	3.00658e+06	1.40118e+06	1.73665e+06	3.41475e+06	2.45661e+06	1.19211e+06	1.80447e+06	1.56505e+06	4	4	5	8	6	3	4	5
Q924W5	1	1	55.82	0.16938	1.22842	PD-L1-KO	wild type	Structural maintenance of chromosomes protein 6 OS=Mus musculus GN=Smc6 PE=2 SV=1 - [SMC6_MOUSE]	14979.1	13773.9	13231.1	20141.4	16789.6	22295.6	15426.8	21804.2	30009	11278.8	15394.1	28731.5	27112.8	34028.7	15426.8	30545.5	0	0	1	1	0	0	1	1
P19157	8	8	488.25	0.169614	1.29242	wild type	PD-L1-KO	Glutathione S-transferase P 1 OS=Mus musculus GN=Gstp1 PE=1 SV=2 - [GSTP1_MOUSE]	988825	1.20242e+06	889350	1.13188e+06	598251	1.06401e+06	1.04743e+06	549679	1.981e+06	984609	1.03474e+06	1.61461e+06	966091	1.62394e+06	1.04743e+06	770045	8	5	4	4	5	4	3	4
Q9DAR7	7	7	413.59	0.169701	1.21464	wild type	PD-L1-KO	m7GpppX diphosphatase OS=Mus musculus GN=Dcps PE=1 SV=1 - [DCPS_MOUSE]	543011	529243	478881	491907	380294	467557	546270	287896	1.08786e+06	433374	557166	701700	614122	713610	546270	403314	7	6	6	4	5	3	5	3
Q9ES52	5	5	332.67	0.170105	1.21306	wild type	PD-L1-KO	Phosphatidylinositol 3,4,5-trisphosphate 5-phosphatase 1 OS=Mus musculus GN=Inpp5d PE=1 SV=2 - [SHIP1_MOUSE]	226673	178917	169444	141263	129547	165337	164801	130803	454116	146507	197144	201509	209201	252346	164801	183242	4	4	3	3	2	3	3	2
Q9D7A6	2	2	107.41	0.17156	1.35315	wild type	PD-L1-KO	Signal recognition particle 19 kDa protein OS=Mus musculus GN=Srp19 PE=2 SV=1 - [SRP19_MOUSE]	344164	370745	395728	402011	275629	382336	329639	130263	689495	303587	460419	573463	445101	583542	329639	182486	1	0	2	1	1	1	0	0
Q9EST3	1	1	24.55	0.171713	1.53851	wild type	PD-L1-KO	Eukaryotic translation initiation factor 4E transporter OS=Mus musculus GN=Eif4enif1 PE=1 SV=2 - [4ET_MOUSE]	2524.16	3175.24	3954.1	4372.6	707.243	5961.1	1898.96	549.333	5056.87	2600.06	4600.49	6237.45	1142.1	9098.15	1898.96	769.561	0	0	0	1	0	1	0	0
Q3V3R1	27	27	1318.46	0.172149	1.10225	wild type	PD-L1-KO	Monofunctional C1-tetrahydrofolate synthase, mitochondrial OS=Mus musculus GN=Mthfd1l PE=1 SV=2 - [C1TM_MOUSE]	3.56397e+06	4.0392e+06	3.72857e+06	4.20346e+06	3.58014e+06	3.38492e+06	4.00348e+06	3.1256e+06	7.14003e+06	3.30752e+06	4.3381e+06	5.99618e+06	5.78141e+06	5.16624e+06	4.00348e+06	4.37865e+06	11	10	16	10	17	9	12	11
Q80V86	1	1	33.2	0.172471	1.02644	wild type	PD-L1-KO	Integrator complex subunit 8 OS=Mus musculus GN=Ints8 PE=2 SV=1 - [INT8_MOUSE]	345.66	0	22687.2	0	15295.9	1864.7	353.032	4925.85	692.492	0	26396	0	24700.7	2846	353.032	6900.63	0	0	1	0	1	0	0	0
Q9JJU8	10	10	491.36	0.173044	1.34407	wild type	PD-L1-KO	SH3 domain-binding glutamic acid-rich-like protein OS=Mus musculus GN=Sh3bgrl PE=3 SV=1 - [SH3L1_MOUSE]	2.32695e+06	2.19462e+06	1.94304e+06	2.18777e+06	1.67625e+06	1.97167e+06	2.03008e+06	759430	4.6618e+06	1.79708e+06	2.26068e+06	3.12082e+06	2.70691e+06	3.00927e+06	2.03008e+06	1.06389e+06	9	5	4	5	5	3	7	0
Q9D0B0	4	2	155.74	0.173232	1.4261	PD-L1-KO	wild type	Serine/arginine-rich splicing factor 9 OS=Mus musculus GN=Srsf9 PE=1 SV=1 - [SRSF9_MOUSE]	81415.5	97132.6	37503.4	90852.4	119144	105556	75417.3	137560	163107	79537.5	43634.3	129600	192400	161105	75417.3	192708	0	1	1	1	1	2	2	0
Q9QXE7	4	1	181.38	0.173687	1.99699	PD-L1-KO	wild type	F-box-like/WD repeat-containing protein TBL1X OS=Mus musculus GN=Tbl1x PE=2 SV=2 - [TBL1X_MOUSE]	976.946	2320.63	13681.6	7639.22	10815.2	4745.17	18697.4	14904.9	1957.21	1900.26	15918.2	10897.3	17465.1	7242.32	18697.4	20880.3	0	0	0	1	0	0	1	0
P47856	4	4	315.29	0.173981	1.34627	wild type	PD-L1-KO	Glutamine--fructose-6-phosphate aminotransferase [isomerizing] 1 OS=Mus musculus GN=Gfpt1 PE=1 SV=3 - [GFPT1_MOUSE]	262995	206886	205853	165972	134089	254276	143480	93369.8	526883	169410	239505	236757	216534	388090	143480	130802	2	2	2	3	3	3	3	2
O54786	5	3	214.4	0.174217	1.09146	PD-L1-KO	wild type	DNA fragmentation factor subunit alpha OS=Mus musculus GN=Dffa PE=1 SV=2 - [DFFA_MOUSE]	17582.3	19109	18084.7	17529.8	19299.2	18785.8	22762.4	18071.5	35224.2	15647.5	21041.1	25006	31165.4	28671.8	22762.4	25316.3	0	0	1	0	2	0	1	0
Q8CCS6	1	1	81.33	0.174564	1.21815	PD-L1-KO	wild type	Polyadenylate-binding protein 2 OS=Mus musculus GN=Pabpn1 PE=2 SV=3 - [PABP2_MOUSE]	408093	566635	420614	622852	520397	760154	580402	597514	817571	463992	489375	888490	840367	1.16019e+06	580402	837057	1	2	2	2	1	2	2	1
O09130	3	3	113.78	0.174765	1.41583	PD-L1-KO	wild type	NFATC2-interacting protein OS=Mus musculus GN=Nfatc2ip PE=1 SV=1 - [NF2IP_MOUSE]	34691.5	48844.5	53753.7	70956.1	75370.8	43687.9	85140.2	90642.2	69500.6	39996.6	62541.2	101218	121713	66678.7	85140.2	126981	0	0	0	2	1	0	0	1
P17710	12	12	544.69	0.175451	1.32968	wild type	PD-L1-KO	Hexokinase-1 OS=Mus musculus GN=Hk1 PE=1 SV=3 - [HXK1_MOUSE]	627535	841810	633631	943224	608874	505350	824728	351981	1.2572e+06	689320	737214	1.3455e+06	983245	771292	824728	493089	4	6	6	4	7	3	4	2
A2AQ19	3	3	114.26	0.175954	1.30918	wild type	PD-L1-KO	RNA polymerase-associated protein RTF1 homolog OS=Mus musculus GN=Rtf1 PE=2 SV=1 - [RTF1_MOUSE]	99774.6	127187	69671.1	77627	73140.4	91779.8	62447.1	58505.5	199888	104148	81060.6	110734	118111	140079	62447.1	81960.4	3	1	1	1	1	0	1	1
P13705	1	1	26.91	0.177192	1.39209	PD-L1-KO	wild type	DNA mismatch repair protein Msh3 OS=Mus musculus GN=Msh3 PE=2 SV=3 - [MSH3_MOUSE]	2127.62	3799.89	5566.28	3774.26	4797.8	7524.73	4235.13	4696.91	4262.45	3111.56	6476.23	5383.93	7747.76	11484.6	4235.13	6579.9	0	0	0	0	0	0	0	1
Q9CX99	2	2	80.77	0.177245	1.95443	wild type	PD-L1-KO	GRB2-related adapter protein OS=Mus musculus GN=Grap PE=2 SV=1 - [GRAP_MOUSE]	11472.2	15882.6	47303.7	17576.8	5996.02	18073.9	14642.8	8480.29	22983.2	13005.6	55036.7	25073.1	9682.72	27585.3	14642.8	11880	1	1	2	1	1	1	1	1
O35127	5	5	205.89	0.177979	1.45498	wild type	PD-L1-KO	Protein C10 OS=Mus musculus GN=Grcc10 PE=2 SV=1 - [C10_MOUSE]	80140.2	99191.3	79152.1	128750	67507.2	73951.7	97000.2	27684.9	160552	81223.3	92091.5	183660	109014	112869	97000.2	38783.8	1	1	3	2	3	0	2	0
Q9D1G1	12	6	604.75	0.178671	1.3575	wild type	PD-L1-KO	Ras-related protein Rab-1B OS=Mus musculus GN=Rab1b PE=1 SV=1 - [RAB1B_MOUSE]	770756	816275	772225	572952	680561	285837	779160	414445	1.54413e+06	668411	898465	817308	1.09901e+06	436259	779160	580596	4	2	3	2	3	0	3	2
Q60787	11	11	582.08	0.179078	1.11765	PD-L1-KO	wild type	Lymphocyte cytosolic protein 2 OS=Mus musculus GN=Lcp2 PE=1 SV=2 - [LCP2_MOUSE]	448907	505732	577061	543210	584522	650715	509965	573823	899337	414121	671396	774882	943920	993155	509965	803869	1	2	8	5	9	4	4	5
O88942	5	4	232.23	0.179097	1.34485	wild type	PD-L1-KO	Nuclear factor of activated T-cells, cytoplasmic 1 OS=Mus musculus GN=Nfatc1 PE=2 SV=1 - [NFAC1_MOUSE]	151177	174520	158980	175098	84944.9	230314	108469	66865.5	302867	142907	184969	249775	137174	351517	108469	93671.8	1	1	2	1	1	2	0	2
Q8CCF0	7	7	193.77	0.179262	1.21005	wild type	PD-L1-KO	U4/U6 small nuclear ribonucleoprotein Prp31 OS=Mus musculus GN=Prpf31 PE=2 SV=3 - [PRP31_MOUSE]	215016	212740	227520	306428	158746	184378	246145	205495	430761	174203	264714	437116	256352	281408	246145	287878	2	1	3	3	2	0	3	1
Q922H4	1	1	46.29	0.179384	1.40894	wild type	PD-L1-KO	Mannose-1-phosphate guanyltransferase alpha OS=Mus musculus GN=Gmppa PE=2 SV=1 - [GMPPA_MOUSE]	10110.6	7867.75	7702.8	4878.99	6261.43	3677.12	7809.31	3942.26	20255.5	6442.55	8962.02	6959.82	10111.3	5612.21	7809.31	5522.71	0	0	1	1	1	0	1	0
Q62511	1	1	41.47	0.180004	1.43246	wild type	PD-L1-KO	E3 ubiquitin-protein ligase ZFP91 OS=Mus musculus GN=Zfp91 PE=1 SV=3 - [ZFP91_MOUSE]	11649	12951.7	8192.68	14164.8	8365.85	7660.5	13000.4	3754.81	23337.6	10605.6	9531.98	20205.9	13509.7	11691.9	13000.4	5260.11	0	0	1	0	1	0	0	0
Q9DBS1	5	5	226.49	0.180413	1.4655	wild type	PD-L1-KO	Transmembrane protein 43 OS=Mus musculus GN=Tmem43 PE=1 SV=1 - [TMM43_MOUSE]	513005	625727	391108	693720	421108	162341	624516	309307	1.02775e+06	512380	455045	989582	680030	247773	624516	433308	3	2	4	1	2	1	2	2
Q3U1Z5	2	2	66.14	0.180759	2.10798	PD-L1-KO	wild type	G-protein-signaling modulator 3 OS=Mus musculus GN=Gpsm3 PE=1 SV=2 - [GPSM3_MOUSE]	39514.8	26604.4	68364.5	114514	241973	51190.2	74909.2	156809	79163.7	21785.2	79540.4	163352	390752	78129.2	74909.2	219674	0	0	0	0	2	0	1	1
Q9D1H8	1	1	94.43	0.180807	1.2712	PD-L1-KO	wild type	39S ribosomal protein L53, mitochondrial OS=Mus musculus GN=Mrpl53 PE=2 SV=1 - [RM53_MOUSE]	22563.9	27103.2	14941.4	19980.1	25556	26194.4	34787.8	20990.5	45204.3	22193.6	17383.9	28501.3	41269.4	39979.3	34787.8	29405.6	1	1	1	1	1	0	1	1
Q61578	9	8	425.11	0.181239	1.17211	wild type	PD-L1-KO	NADPH:adrenodoxin oxidoreductase, mitochondrial OS=Mus musculus GN=Fdxr PE=2 SV=1 - [ADRO_MOUSE]	722788	651659	507358	661832	463028	489832	615503	601766	1.44803e+06	533615	590299	944095	747725	747608	615503	843013	3	3	5	3	6	3	4	2
P59016	2	1	37.98	0.18153	3.21489	wild type	PD-L1-KO	Vacuolar protein sorting-associated protein 33B OS=Mus musculus GN=Vps33b PE=1 SV=1 - [VP33B_MOUSE]	12354.8	19997.4	23642.1	15491.8	0	1072.01	12958.6	8205.34	24751.5	16375	27507	22098.9	0	1636.16	12958.6	11494.9	0	0	1	0	0	0	0	0
Q56A08	1	1	16.1	0.182076	2.79558	wild type	PD-L1-KO	G patch domain and KOW motifs-containing protein OS=Mus musculus GN=Gpkow PE=2 SV=2 - [GPKOW_MOUSE]	2283.4	1434.36	437.195	311.603	379.554	252.279	589.687	376.206	4574.55	1174.54	508.666	444.497	612.926	385.042	589.687	527.026	1	0	0	0	0	0	0	0
Q9JMH6	4	4	269.54	0.182279	1.57109	wild type	PD-L1-KO	Thioredoxin reductase 1, cytoplasmic OS=Mus musculus GN=Txnrd1 PE=1 SV=3 - [TRXR1_MOUSE]	286079	215078	118721	183128	69068.6	184881	193848	63318.1	573129	176118	138129	261229	111536	282175	193848	88702.4	1	1	2	0	1	0	1	0
Q69ZR9	1	1	21.52	0.1823	1.80178	PD-L1-KO	wild type	Protein FAM208A OS=Mus musculus GN=Fam208a PE=2 SV=2 - [F208A_MOUSE]	8117.3	7259.34	14720.8	16938.4	19908	38249.3	16974	9616.71	16262.1	5944.35	17127.3	24162.4	32148.5	58378.1	16974	13472	0	0	0	1	0	0	0	0
P62715	5	1	237.67	0.182343	1.26473	wild type	PD-L1-KO	Serine/threonine-protein phosphatase 2A catalytic subunit beta isoform OS=Mus musculus GN=Ppp2cb PE=1 SV=1 - [PP2AB_MOUSE]	150711	223148	179592	206877	145265	127016	218859	110036	301932	182726	208950	295107	234582	193859	218859	154150	1	1	0	1	0	1	1	1
Q11011	6	4	217.45	0.183302	1.88373	wild type	PD-L1-KO	Puromycin-sensitive aminopeptidase OS=Mus musculus GN=Npepps PE=1 SV=2 - [PSA_MOUSE]	575989	841206	426548	1.02199e+06	541419	406900	53283.2	519705	1.15393e+06	688826	496278	1.45786e+06	874315	621033	53283.2	728055	2	1	2	1	0	0	0	0
Q9D7M8	3	3	170.17	0.184048	1.22099	PD-L1-KO	wild type	DNA-directed RNA polymerase II subunit RPB4 OS=Mus musculus GN=Polr2d PE=2 SV=2 - [RPB4_MOUSE]	262355	362602	243283	291066	276057	365111	442575	331761	525601	296918	283053	415202	445792	557252	442575	464764	2	2	2	1	1	1	1	2
Q8R326	6	6	266.29	0.184882	1.15165	wild type	PD-L1-KO	Paraspeckle component 1 OS=Mus musculus GN=Pspc1 PE=1 SV=1 - [PSPC1_MOUSE]	646758	657685	640897	669542	580739	671753	603129	414936	1.29571e+06	538549	745668	955093	937811	1.02526e+06	603129	581284	2	1	2	3	2	2	2	2
P16858	58	58	2770.95	0.18518	1.36951	wild type	PD-L1-KO	Glyceraldehyde-3-phosphate dehydrogenase OS=Mus musculus GN=Gapdh PE=1 SV=2 - [G3P_MOUSE]	7.51768e+07	6.83379e+07	5.71812e+07	4.70326e+07	4.31416e+07	4.78873e+07	6.68266e+07	2.30328e+07	1.50609e+08	5.59589e+07	6.6529e+07	6.70914e+07	6.96676e+07	7.30881e+07	6.68266e+07	3.22666e+07	66	50	73	40	67	33	53	27
Q9JI11	12	12	448.08	0.185777	1.24398	wild type	PD-L1-KO	Serine/threonine-protein kinase 4 OS=Mus musculus GN=Stk4 PE=1 SV=1 - [STK4_MOUSE]	785345	812413	690623	543817	654648	417735	709861	494475	1.57335e+06	665249	803523	775749	1.05716e+06	637570	709861	692709	5	1	6	8	7	3	7	4
P62274	7	7	328.37	0.186403	1.86383	PD-L1-KO	wild type	40S ribosomal protein S29 OS=Mus musculus GN=Rps29 PE=2 SV=2 - [RS29_MOUSE]	5229.74	34088.6	50491.8	130415	91506.2	177653	66818.5	74483.5	10477.2	27913.7	58746	186035	147769	271144	66818.5	104344	0	0	2	3	3	5	2	3
Q5XJY5	13	11	595.94	0.186528	1.3224	wild type	PD-L1-KO	Coatomer subunit delta OS=Mus musculus GN=Arcn1 PE=2 SV=2 - [COPD_MOUSE]	906408	879589	752376	557848	706934	795457	448084	390896	1.81589e+06	720256	875371	795763	1.1416e+06	1.21407e+06	448084	547606	6	3	5	2	4	1	1	3
Q9QVP9	5	5	163.67	0.186564	1.317	wild type	PD-L1-KO	Protein-tyrosine kinase 2-beta OS=Mus musculus GN=Ptk2b PE=1 SV=2 - [FAK2_MOUSE]	80164.2	58076.1	103577	57794.2	75942.4	47292	50244.2	54017.4	160600	47555.9	120509	82442.7	122636	72179.5	50244.2	75673	1	1	5	0	3	1	2	1
Q922H2	3	3	220.48	0.186725	1.21632	PD-L1-KO	wild type	[Pyruvate dehydrogenase [lipoamide]] kinase isozyme 3, mitochondrial OS=Mus musculus GN=Pdk3 PE=2 SV=1 - [PDK3_MOUSE]	141935	166950	96358	168978	192210	191203	164206	150818	284351	136708	112110	241044	310392	291825	164206	211281	1	1	1	1	2	1	1	3
Q6P8X1	2	2	80.45	0.186801	1.78889	PD-L1-KO	wild type	Sorting nexin-6 OS=Mus musculus GN=Snx6 PE=1 SV=2 - [SNX6_MOUSE]	9208.41	9279.01	30958.4	14380.7	30864.7	45171	11493.8	26649.5	18448.1	7598.17	36019.4	20513.9	49842.1	68942.3	11493.8	37333.3	0	0	1	1	2	0	0	0
Q99MV1	1	1	21.7	0.187037	34.1638	PD-L1-KO	wild type	Tudor domain-containing protein 1 OS=Mus musculus GN=Tdrd1 PE=1 SV=2 - [TDRD1_MOUSE]	7333.69	2741.72	1275.28	4810.65	1859.35	12887.5	15302.9	522084	14692.3	2245.07	1483.76	6862.33	3002.59	19669.6	15302.9	731387	0	0	0	0	0	0	0	1
O35130	2	2	69.28	0.187137	1.38984	wild type	PD-L1-KO	Ribosomal RNA small subunit methyltransferase NEP1 OS=Mus musculus GN=Emg1 PE=1 SV=1 - [NEP1_MOUSE]	58513.5	70613.6	53171.6	52862.4	24767.2	58608.8	64808.5	21016.2	117226	57822.3	61863.9	75407.5	39995.5	89451.9	64808.5	29441.6	1	0	2	0	1	1	1	1
P22646	12	12	487.46	0.188913	1.33858	wild type	PD-L1-KO	T-cell surface glycoprotein CD3 epsilon chain OS=Mus musculus GN=Cd3e PE=1 SV=2 - [CD3E_MOUSE]	4.26367e+06	5.38765e+06	3.55856e+06	5.39504e+06	3.62436e+06	3.77562e+06	4.63801e+06	1.86098e+06	8.54181e+06	4.41171e+06	4.1403e+06	7.69596e+06	5.85283e+06	5.76255e+06	4.63801e+06	2.60705e+06	8	10	6	6	9	11	7	5
Q8R344	1	1	22.64	0.188934	269.923	wild type	PD-L1-KO	Coiled-coil domain-containing protein 12 OS=Mus musculus GN=Ccdc12 PE=1 SV=2 - [CCD12_MOUSE]	822.572	12155.2	0	26.3017	41.4584	6.71866	0	0	1647.93	9953.35	0	37.519	66.9494	10.2544	0	0	0	1	0	0	0	0	0	0
Q02053	33	32	2239.46	0.189479	1.18812	wild type	PD-L1-KO	Ubiquitin-like modifier-activating enzyme 1 OS=Mus musculus GN=Uba1 PE=1 SV=1 - [UBA1_MOUSE]	5.95677e+06	4.764e+06	5.55132e+06	4.25614e+06	4.10039e+06	4.91061e+06	4.92418e+06	3.34268e+06	1.19337e+07	3.90103e+06	6.45882e+06	6.07133e+06	6.62154e+06	7.49483e+06	4.92418e+06	4.68276e+06	24	20	22	21	22	23	26	17
Q9CY64	5	5	258.03	0.189751	1.30143	wild type	PD-L1-KO	Biliverdin reductase A OS=Mus musculus GN=Blvra PE=2 SV=1 - [BIEA_MOUSE]	458906	463062	394526	244580	269269	274184	312290	343767	919369	379181	459022	348890	434831	418474	312290	481583	2	2	4	3	3	3	3	1
P42125	8	8	357.8	0.191277	1.31326	wild type	PD-L1-KO	Enoyl-CoA delta isomerase 1, mitochondrial OS=Mus musculus GN=Eci1 PE=2 SV=2 - [ECI1_MOUSE]	624273	1.1233e+06	1.01554e+06	1.1153e+06	992866	601146	738455	620816	1.25066e+06	919820	1.18156e+06	1.59096e+06	1.60334e+06	917500	738455	869700	3	5	3	6	3	3	5	5
Q9WUP7	2	2	144.26	0.191635	1.15933	PD-L1-KO	wild type	Ubiquitin carboxyl-terminal hydrolase isozyme L5 OS=Mus musculus GN=Uchl5 PE=2 SV=2 - [UCHL5_MOUSE]	107231	110236	144395	103060	116721	130922	130226	161129	214826	90267.6	168000	147013	188488	199821	130226	225725	1	1	1	1	1	0	2	2
O70591	2	2	111.59	0.19246	1.23257	wild type	PD-L1-KO	Prefoldin subunit 2 OS=Mus musculus GN=Pfdn2 PE=2 SV=2 - [PFD2_MOUSE]	194529	238963	167899	193203	160976	139495	226817	117373	389717	195676	195347	275602	259954	212905	226817	164428	2	1	2	2	2	1	2	2
Q99JR8	8	8	305.78	0.192601	1.25736	wild type	PD-L1-KO	SWI/SNF-related matrix-associated actin-dependent regulator of chromatin subfamily D member 2 OS=Mus musculus GN=Smarcd2 PE=2 SV=2 - [SMRD2_MOUSE]	309777	320509	250852	205964	203936	219884	284998	155771	620604	262451	291861	293805	329328	335598	284998	218219	4	1	5	1	3	1	3	2
Q9ERN0	2	2	74.93	0.192856	1.40678	wild type	PD-L1-KO	Secretory carrier-associated membrane protein 2 OS=Mus musculus GN=Scamp2 PE=2 SV=1 - [SCAM2_MOUSE]	30662.5	37257.1	31842.2	16327.7	17390.7	18551.4	28913.8	17665.5	61429	30508.2	37047.7	23291.2	28083.6	28314.1	28913.8	24747.5	2	0	2	1	1	1	1	1
Q8VDP3	6	6	341.49	0.193003	1.14198	wild type	PD-L1-KO	Protein-methionine sulfoxide oxidase MICAL1 OS=Mus musculus GN=Mical1 PE=1 SV=1 - [MICA1_MOUSE]	295546	339266	291398	250740	219693	299144	270447	241335	592094	277810	339035	357677	354773	456569	270447	338086	1	2	5	2	3	1	3	1
Q9CPQ1	2	2	90.76	0.193575	1.42455	PD-L1-KO	wild type	Cytochrome c oxidase subunit 6C OS=Mus musculus GN=Cox6c PE=1 SV=3 - [COX6C_MOUSE]	694.546	1230.77	25130.7	59412.7	36119.4	25618.6	38099.2	23341.9	1391.45	1007.82	29238.9	84751.4	58327.7	39100.4	38099.2	32699.7	0	0	0	0	2	0	0	1
Q8CGZ0	6	6	309.54	0.193909	1.1779	PD-L1-KO	wild type	Calcium homeostasis endoplasmic reticulum protein OS=Mus musculus GN=Cherp PE=1 SV=1 - [CHERP_MOUSE]	82384.3	123952	119034	92991.4	127459	130731	133552	101047	165048	101499	138493	132651	205829	199529	133552	141557	2	2	5	0	4	1	3	2
Q8BP92	5	5	312.38	0.194212	1.353	PD-L1-KO	wild type	Reticulocalbin-2 OS=Mus musculus GN=Rcn2 PE=2 SV=1 - [RCN2_MOUSE]	187888	319757	153732	326724	230116	413231	360712	332840	376413	261834	178864	466067	371605	630695	360712	466275	1	2	1	2	1	1	2	1
Q9QWV9	1	1	50.27	0.1945	1.18935	PD-L1-KO	wild type	Cyclin-T1 OS=Mus musculus GN=Ccnt1 PE=1 SV=3 - [CCNT1_MOUSE]	35588	31441.9	45139.9	31990.6	52147.1	44946.7	35396.8	38966.7	71296.6	25746.4	52519.2	45634.1	84210.2	68600.1	35396.8	54588.4	0	0	0	0	0	0	1	0
Q80U16	2	2	75.95	0.19474	2.00665	wild type	PD-L1-KO	Protein FAM65B OS=Mus musculus GN=Fam65b PE=1 SV=2 - [FA65B_MOUSE]	92145.9	65759.3	84584.1	29169.4	56657	3538.5	45798.7	29384.9	184604	53847.4	98411.6	41609.7	91493	5400.65	45798.7	41165.2	1	0	1	0	1	0	1	0
P51125	18	18	761.35	0.19491	1.19682	wild type	PD-L1-KO	Calpastatin OS=Mus musculus GN=Cast PE=1 SV=2 - [ICAL_MOUSE]	2.13184e+06	2.02898e+06	1.77342e+06	1.84094e+06	1.69233e+06	1.46954e+06	2.17935e+06	1.15532e+06	4.27091e+06	1.66144e+06	2.06333e+06	2.62608e+06	2.73287e+06	2.24289e+06	2.17935e+06	1.61849e+06	9	6	9	7	10	3	8	7
Q99N87	2	2	44.61	0.194992	4.8634	PD-L1-KO	wild type	28S ribosomal protein S5, mitochondrial OS=Mus musculus GN=Mrps5 PE=2 SV=1 - [RT05_MOUSE]	53570.4	42446.9	12448.9	32903.2	126967	29807.6	34936.9	495825	107323	34757.9	14483.9	46936	205034	45494	34936.9	694601	0	0	0	0	0	0	0	2
P42669	5	5	225.72	0.195009	1.34062	wild type	PD-L1-KO	Transcriptional activator protein Pur-alpha OS=Mus musculus GN=Pura PE=1 SV=1 - [PURA_MOUSE]	589848	752155	443179	538777	498601	396452	597743	240699	1.1817e+06	615907	515627	768558	805170	605086	597743	337196	3	1	4	2	2	2	2	2
Q6PHZ2	1	1	15.57	0.195086	1.55378	wild type	PD-L1-KO	Calcium/calmodulin-dependent protein kinase type II subunit delta OS=Mus musculus GN=Camk2d PE=1 SV=1 - [KCC2D_MOUSE]	30220.6	30203.8	59327.3	41980.4	47851.5	34843	11526.2	9868.66	60543.8	24732.5	69025.9	59884.5	77273.4	53179.2	11526.2	13825	0	0	1	0	0	0	0	0
Q3TIU4	6	6	291.32	0.195351	1.31008	wild type	PD-L1-KO	2',5'-phosphodiesterase 12 OS=Mus musculus GN=Pde12 PE=2 SV=2 - [PDE12_MOUSE]	143631	217737	145401	221492	150158	181125	135195	89413.5	287750	178295	169170	315956	242483	276443	135195	125259	2	1	2	4	4	2	1	2
O08539	18	18	954.28	0.195623	1.25858	wild type	PD-L1-KO	Myc box-dependent-interacting protein 1 OS=Mus musculus GN=Bin1 PE=1 SV=1 - [BIN1_MOUSE]	1.70041e+06	1.58371e+06	1.19634e+06	1.26897e+06	1.29943e+06	823504	1.55848e+06	886765	3.40658e+06	1.29683e+06	1.39192e+06	1.81016e+06	2.0984e+06	1.25688e+06	1.55848e+06	1.24227e+06	11	7	11	7	11	4	8	8
Q9D0M5	4	4	165.6	0.195797	2.16186	wild type	PD-L1-KO	Dynein light chain 2, cytoplasmic OS=Mus musculus GN=Dynll2 PE=1 SV=1 - [DYL2_MOUSE]	74921.1	15312.3	48257.6	21987.1	21091.1	5848.28	29379	17913.2	150096	12538.6	56146.5	31364.3	34059.2	8925.95	29379	25094.6	2	0	1	0	0	0	1	0
Q8C3J5	16	16	921.1	0.195853	1.25253	wild type	PD-L1-KO	Dedicator of cytokinesis protein 2 OS=Mus musculus GN=Dock2 PE=1 SV=3 - [DOCK2_MOUSE]	1.00599e+06	1.04365e+06	838025	593116	656436	755661	598979	767925	2.01539e+06	854598	975022	846072	1.06005e+06	1.15333e+06	598979	1.07579e+06	6	6	7	5	8	2	4	2
Q8CGC7	19	19	983.96	0.195947	1.20483	wild type	PD-L1-KO	Bifunctional glutamate/proline--tRNA ligase OS=Mus musculus GN=Eprs PE=1 SV=4 - [SYEP_MOUSE]	671381	695455	875472	906121	767477	648977	725484	471225	1.34504e+06	569477	1.01859e+06	1.29257e+06	1.23937e+06	990503	725484	660138	6	6	13	4	5	4	4	5
Q9WVA4	12	9	644.56	0.196975	1.14722	PD-L1-KO	wild type	Transgelin-2 OS=Mus musculus GN=Tagln2 PE=1 SV=4 - [TAGL2_MOUSE]	2.34921e+06	2.12681e+06	1.86568e+06	1.62505e+06	2.11373e+06	2.58663e+06	2.40939e+06	2.02986e+06	4.7064e+06	1.74155e+06	2.17067e+06	2.31811e+06	3.41337e+06	3.94785e+06	2.40939e+06	2.84364e+06	8	5	5	2	8	4	4	7
P24161	3	3	158.55	0.197201	1.4106	PD-L1-KO	wild type	T-cell surface glycoprotein CD3 zeta chain OS=Mus musculus GN=Cd247 PE=1 SV=1 - [CD3Z_MOUSE]	18894.3	38593.7	90738	57619.8	83214.6	63200.7	76439.7	67512.1	37852.7	31602.7	105571	82193.9	134380	96460.3	76439.7	94577.6	0	0	1	2	2	1	0	0
Q9CQ10	2	2	102.87	0.197532	1.50412	wild type	PD-L1-KO	Charged multivesicular body protein 3 OS=Mus musculus GN=Chmp3 PE=1 SV=3 - [CHMP3_MOUSE]	28117.6	33623	25005.1	28868.3	2113.45	40350.2	33155	1246.35	56330.6	27532.4	29092.9	41180.3	3412.92	61584.6	33155	1746.01	0	0	1	1	0	0	1	0
Q9QYC0	7	7	332.91	0.197921	1.16447	wild type	PD-L1-KO	Alpha-adducin OS=Mus musculus GN=Add1 PE=1 SV=2 - [ADDA_MOUSE]	390071	390312	490582	433166	401834	270617	407526	383466	781464	319609	570780	617905	648905	413030	407526	537197	2	0	5	3	7	1	2	2
P18155	3	3	192.55	0.198509	1.40327	wild type	PD-L1-KO	Bifunctional methylenetetrahydrofolate dehydrogenase/cyclohydrolase, mitochondrial OS=Mus musculus GN=Mthfd2 PE=1 SV=1 - [MTDC_MOUSE]	268709	388191	321773	494706	402570	149121	329778	168488	538330	317872	374375	705692	650094	227596	329778	236035	2	2	2	2	2	1	2	1
Q8C4Q6	1	1	23.77	0.199269	1.6465	wild type	PD-L1-KO	Axin interactor, dorsalization-associated protein OS=Mus musculus GN=Aida PE=1 SV=1 - [AIDA_MOUSE]	7763.5	15398.5	5253.59	7896.79	1934.7	4815.32	11060.9	4243.34	15553.3	12609.2	6112.43	11264.7	3124.26	7349.4	11060.9	5944.49	0	0	1	0	0	0	0	0
P15864	8	2	415.78	0.200033	1.45407	PD-L1-KO	wild type	Histone H1.2 OS=Mus musculus GN=Hist1h1c PE=1 SV=2 - [H12_MOUSE]	44350.1	54836.9	53409.6	82674.2	83164	137520	65537.3	55878	88850.6	44903.5	62140.8	117934	134298	209890	65537.3	78279.5	0	0	1	2	2	2	1	1
Q9ERH4	1	1	50.42	0.200655	1.6846	PD-L1-KO	wild type	Nucleolar and spindle-associated protein 1 OS=Mus musculus GN=Nusap1 PE=1 SV=1 - [NUSAP_MOUSE]	167.965	1056.31	0	5662.17	2426.73	3758.88	1941.11	3474.17	336.5	864.966	0	8077.01	3918.82	5737	1941.11	4866.96	0	0	0	1	0	0	0	1
Q9CPP6	3	3	153.32	0.200782	1.4461	wild type	PD-L1-KO	NADH dehydrogenase [ubiquinone] 1 alpha subcomplex subunit 5 OS=Mus musculus GN=Ndufa5 PE=1 SV=3 - [NDUA5_MOUSE]	150133	141706	162827	75902.4	81307.5	58472.3	162413	64702.7	300775	116036	189445	108274	131300	89243.5	162413	90642	1	2	1	0	1	0	1	0
O88890	1	1	91.29	0.200869	1.66658	wild type	PD-L1-KO	SH2 domain-containing protein 1A OS=Mus musculus GN=Sh2d1a PE=1 SV=1 - [SH21A_MOUSE]	308100	276745	244943	128010	186756	33843.9	245263	108847	617245	226614	284986	182605	301584	51654.4	245263	152484	2	2	1	1	1	0	1	1
Q62446	6	6	194.28	0.200985	1.89191	wild type	PD-L1-KO	Peptidyl-prolyl cis-trans isomerase FKBP3 OS=Mus musculus GN=Fkbp3 PE=1 SV=2 - [FKBP3_MOUSE]	99082.8	76351.8	186690	37673.2	50539	41978.6	62056.5	56745.8	198502	62521.1	217210	53740.4	81613.3	64070	62056.5	79495.1	2	1	1	1	0	1	2	1
Q9DBC3	1	1	31.45	0.201061	1.99674	PD-L1-KO	wild type	Cap-specific mRNA (nucleoside-2'-O-)-methyltransferase 1 OS=Mus musculus GN=Ftsjd2 PE=1 SV=1 - [MTR1_MOUSE]	0	44.5901	9177.58	5899.24	9871.13	1146.13	11184.6	7991.61	0	36.5129	10677.9	8415.19	15940.5	1749.28	11184.6	11195.4	0	0	0	0	1	0	0	0
P16546	64	61	3417.56	0.201654	1.20973	wild type	PD-L1-KO	Spectrin alpha chain, non-erythrocytic 1 OS=Mus musculus GN=Sptan1 PE=1 SV=4 - [SPTN1_MOUSE]	2.67907e+06	2.35558e+06	1.96641e+06	2.41566e+06	2.25985e+06	1.67166e+06	2.45594e+06	1.39672e+06	5.36723e+06	1.92888e+06	2.28787e+06	3.44591e+06	3.64933e+06	2.55138e+06	2.45594e+06	1.95667e+06	16	14	33	20	34	11	21	17
P14824	75	73	4307.23	0.201754	1.23414	wild type	PD-L1-KO	Annexin A6 OS=Mus musculus GN=Anxa6 PE=1 SV=3 - [ANXA6_MOUSE]	2.20366e+07	1.95127e+07	1.75754e+07	1.80468e+07	1.49757e+07	2.18601e+07	1.58345e+07	9.86058e+06	4.41481e+07	1.59781e+07	2.04486e+07	2.57435e+07	2.41836e+07	3.3364e+07	1.58345e+07	1.38137e+07	61	47	52	45	47	52	49	30
P06800	42	42	1888.28	0.201969	1.20227	wild type	PD-L1-KO	Receptor-type tyrosine-protein phosphatase C OS=Mus musculus GN=Ptprc PE=1 SV=3 - [PTPRC_MOUSE]	8.48641e+06	6.35906e+06	7.84975e+06	5.25254e+06	6.42399e+06	5.05761e+06	5.9712e+06	5.79298e+06	1.70016e+07	5.20715e+06	9.13299e+06	7.49269e+06	1.03738e+07	7.71919e+06	5.9712e+06	8.11538e+06	32	17	25	16	22	12	19	19
Q8VDP2	3	3	191.83	0.20244	1.26056	wild type	PD-L1-KO	UPF0428 protein CXorf56 homolog OS=Mus musculus PE=2 SV=1 - [CX056_MOUSE]	98568.1	138683	109182	142386	112897	74760.5	130413	69708.7	197471	113562	127030	203111	182312	114103	130413	97654.9	0	1	1	1	2	0	1	1
Q08093	9	9	479.47	0.202982	1.26379	wild type	PD-L1-KO	Calponin-2 OS=Mus musculus GN=Cnn2 PE=2 SV=1 - [CNN2_MOUSE]	2.3293e+06	2.58809e+06	1.80009e+06	2.51545e+06	1.80436e+06	2.76504e+06	1.46888e+06	1.26747e+06	4.66649e+06	2.11927e+06	2.09436e+06	3.58826e+06	2.91378e+06	4.22016e+06	1.46888e+06	1.7756e+06	10	9	8	6	6	8	6	4
Q8VCY6	3	3	110.26	0.203742	1.38373	PD-L1-KO	wild type	U3 small nucleolar RNA-associated protein 6 homolog OS=Mus musculus GN=Utp6 PE=2 SV=1 - [UTP6_MOUSE]	44787.4	52203.3	42223.3	57911.9	65022.9	107123	54640.4	45981.9	89726.8	42746.9	49125.7	82610.6	105003	163497	54640.4	64416	0	1	1	1	0	1	0	2
Q2TPA8	6	6	306.73	0.204636	1.29552	wild type	PD-L1-KO	Hydroxysteroid dehydrogenase-like protein 2 OS=Mus musculus GN=Hsdl2 PE=2 SV=1 - [HSDL2_MOUSE]	156554	152345	181433	156991	193324	66405.3	142423	97509.2	313639	124749	211092	223946	312191	101351	142423	136601	2	2	5	3	4	1	3	3
Q78HU7	1	1	41.31	0.204672	1.40758	PD-L1-KO	wild type	Glycophorin-C OS=Mus musculus GN=Gypc PE=2 SV=2 - [GLPC_MOUSE]	417.565	163.235	0	30531.8	19118.9	415.14	9042.74	15216.6	836.547	133.666	0	43553.3	30874.4	633.608	9042.74	21316.9	0	0	0	0	1	0	0	0
Q7TN58	1	1	35.92	0.206746	1.33864	wild type	PD-L1-KO	Transmembrane channel-like protein 8 OS=Mus musculus GN=Tmc8 PE=2 SV=2 - [TMC8_MOUSE]	12881.6	13505.5	13136.7	10075.6	8384.17	16694.3	7574.8	4398.85	25806.8	11059.1	15284.2	14372.8	13539.2	25479.8	7574.8	6162.34	0	0	0	0	1	0	0	0
P21447	1	1	35.06	0.206902	194.149	wild type	PD-L1-KO	Multidrug resistance protein 1A OS=Mus musculus GN=Abcb1a PE=1 SV=3 - [MDR1A_MOUSE]	2818.47	15.931	11.2654	0.627786	0	5.31483	0	9.3455	5646.5	13.0452	13.107	0.895529	0	8.11177	0	13.0921	1	0	0	0	0	0	0	0
Q8QZY1	1	1	78.99	0.207085	1.51287	wild type	PD-L1-KO	Eukaryotic translation initiation factor 3 subunit L OS=Mus musculus GN=Eif3l PE=1 SV=1 - [EIF3L_MOUSE]	186371	91095.7	140762	82059.5	137042	61306.6	91950.6	40389.3	373373	74594.2	163774	117057	221303	93569.4	91950.6	56581.4	1	1	1	0	1	1	1	0
Q9DCM0	1	1	94.41	0.207358	3.63648	PD-L1-KO	wild type	Protein ETHE1, mitochondrial OS=Mus musculus GN=Ethe1 PE=1 SV=2 - [ETHE1_MOUSE]	204.215	271.288	152.778	11330.5	17190	176.637	17847.9	8273.25	409.123	222.146	177.754	16162.8	27759.5	269.593	17847.9	11590	0	0	0	0	0	0	0	1
Q9D7E3	1	1	43.44	0.207416	1.94671	wild type	PD-L1-KO	Ovarian cancer-associated gene 2 protein homolog OS=Mus musculus GN=Ovca2 PE=2 SV=1 - [OVCA2_MOUSE]	1108.59	1517.95	4596.37	3571.74	713.461	2180.83	1133.17	1517.6	2220.94	1242.98	5347.77	5095.03	1152.14	3328.5	1133.17	2126.01	0	0	0	0	0	0	0	0
Q9CQS2	1	1	38.47	0.20775	13.2492	PD-L1-KO	wild type	H/ACA ribonucleoprotein complex subunit 3 OS=Mus musculus GN=Nop10 PE=3 SV=1 - [NOP10_MOUSE]	19.829	362.445	1467.49	1245.49	15009	87.2234	4015.6	21897.9	39.7252	296.79	1707.39	1776.68	24237.3	133.125	4015.6	30676.7	0	0	0	0	1	0	0	0
Q9DAK9	3	3	70.44	0.208333	2.09747	PD-L1-KO	wild type	14 kDa phosphohistidine phosphatase OS=Mus musculus GN=Phpt1 PE=1 SV=1 - [PHP14_MOUSE]	9490.97	51918.5	3267.83	696.144	10108.6	83036.5	29907.5	14066.5	19014.1	42513.8	3802.04	993.04	16323.9	126735	29907.5	19705.7	0	1	0	0	1	2	1	1
Q9DBR1	14	14	646.29	0.208711	1.17069	PD-L1-KO	wild type	5'-3' exoribonuclease 2 OS=Mus musculus GN=Xrn2 PE=1 SV=1 - [XRN2_MOUSE]	703312	695806	862819	1.05711e+06	1.1378e+06	844672	996638	906453	1.40901e+06	569764	1.00387e+06	1.50796e+06	1.83739e+06	1.28918e+06	996638	1.26985e+06	3	2	8	5	8	1	8	5
P42209	20	20	948.68	0.209253	1.26672	wild type	PD-L1-KO	Septin-1 OS=Mus musculus GN=Sept1 PE=2 SV=2 - [SEPT1_MOUSE]	2.94466e+06	2.23582e+06	2.71859e+06	2.2837e+06	2.07475e+06	3.12866e+06	1.53891e+06	1.2964e+06	5.8993e+06	1.83082e+06	3.16301e+06	3.25767e+06	3.35042e+06	4.77512e+06	1.53891e+06	1.81613e+06	6	3	11	3	10	5	5	6
Q9CWW7	1	1	40.62	0.209392	1.56711	wild type	PD-L1-KO	CpG-binding protein OS=Mus musculus GN=Cxxc1 PE=2 SV=1 - [CXXC1_MOUSE]	7733.88	4948.7	4682.12	4554.55	321.64	5848.12	7799.36	17.9717	15494	4052.27	5447.53	6497.01	519.404	8925.7	7799.36	25.1766	0	0	0	0	0	1	0	0
Q9JKX6	7	7	421.71	0.209521	2.40283	PD-L1-KO	wild type	ADP-sugar pyrophosphatase OS=Mus musculus GN=Nudt5 PE=1 SV=1 - [NUDT5_MOUSE]	171174	214305	156412	255876	174283	351880	233103	1.15764e+06	342929	175485	181981	365004	281443	537058	233103	1.62173e+06	1	1	3	2	3	2	3	2
Q8CEC0	3	3	196.4	0.210215	1.38083	PD-L1-KO	wild type	Nuclear pore complex protein Nup88 OS=Mus musculus GN=Nup88 PE=2 SV=1 - [NUP88_MOUSE]	110114	162952	72011.5	169851	257433	132981	149654	170959	220602	133434	83783.6	242290	415719	202962	149654	239497	2	1	1	0	3	2	2	1
P70372	7	7	312.04	0.210233	1.18382	wild type	PD-L1-KO	ELAV-like protein 1 OS=Mus musculus GN=Elavl1 PE=1 SV=2 - [ELAV1_MOUSE]	693955	847433	603165	585098	617310	511511	697107	479876	1.39026e+06	693925	701768	834635	996868	780696	697107	672258	4	2	3	3	4	1	3	1
Q80XN0	5	5	248.34	0.210361	1.28328	wild type	PD-L1-KO	D-beta-hydroxybutyrate dehydrogenase, mitochondrial OS=Mus musculus GN=Bdh1 PE=1 SV=2 - [BDH_MOUSE]	210463	313621	177163	238380	176963	137928	261844	155472	421639	256810	206125	340045	285770	210513	261844	217800	4	1	3	2	3	1	2	1
O35295	1	1	47.59	0.210607	2.24635	wild type	PD-L1-KO	Transcriptional activator protein Pur-beta OS=Mus musculus GN=Purb PE=1 SV=3 - [PURB_MOUSE]	16325.5	10937.6	18526.4	2188.45	8631.51	765.448	11762.5	198.738	32706.5	8956.28	21555	3121.79	13938.7	1168.27	11762.5	278.412	0	0	1	0	1	0	1	0
Q9CY94	1	1	29.66	0.210699	1.28147	PD-L1-KO	wild type	DNA replication complex GINS protein PSF3 OS=Mus musculus GN=Gins3 PE=2 SV=1 - [PSF3_MOUSE]	6707.51	10215.9	11661.2	9976.84	10637.7	15787.8	9027.81	13962.2	13437.8	8365.31	13567.5	14231.8	17178.4	24096.2	9027.81	19559.6	0	0	0	0	0	0	0	0
P46664	8	8	450.15	0.210761	1.33362	wild type	PD-L1-KO	Adenylosuccinate synthetase isozyme 2 OS=Mus musculus GN=Adss PE=1 SV=2 - [PURA2_MOUSE]	926041	1.19607e+06	778574	1.20074e+06	440644	1.31936e+06	715802	599600	1.85522e+06	979406	905852	1.71283e+06	711578	2.01368e+06	715802	839979	5	3	7	4	5	4	3	5
Q00547	1	1	57.5	0.210761	1.4195	wild type	PD-L1-KO	Hyaluronan mediated motility receptor OS=Mus musculus GN=Hmmr PE=1 SV=4 - [HMMR_MOUSE]	16676	23316.1	11181.8	16862.7	6819.47	28395.6	5746.3	6968.69	33408.6	19092.5	13009.7	24054.5	11012.5	43338.9	5746.3	9762.43	0	0	0	0	0	1	0	0
P70333	28	8	1695.46	0.21106	1.41116	wild type	PD-L1-KO	Heterogeneous nuclear ribonucleoprotein H2 OS=Mus musculus GN=Hnrnph2 PE=1 SV=1 - [HNRH2_MOUSE]	593693	683431	698879	924587	640838	947714	219055	247861	1.1894e+06	559631	813129	1.31891e+06	1.03486e+06	1.44645e+06	219055	347228	4	2	3	4	3	5	2	2
P27546	26	26	996.4	0.212052	1.12986	wild type	PD-L1-KO	Microtubule-associated protein 4 OS=Mus musculus GN=Map4 PE=1 SV=3 - [MAP4_MOUSE]	1.84763e+06	1.65855e+06	1.58569e+06	1.49483e+06	1.50446e+06	1.65293e+06	1.5279e+06	1.14439e+06	3.70153e+06	1.35812e+06	1.84491e+06	2.13236e+06	2.42948e+06	2.5228e+06	1.5279e+06	1.60317e+06	7	6	14	9	12	7	8	11
Q8VE80	1	1	37.01	0.212133	1.96767	wild type	PD-L1-KO	THO complex subunit 3 OS=Mus musculus GN=Thoc3 PE=2 SV=1 - [THOC3_MOUSE]	50506.7	84687.3	79838.4	47973.3	11846.3	164.888	78411.8	43240.3	101185	69346.7	92890	68433.3	19130.1	251.661	78411.8	60575.3	0	0	1	0	0	0	0	0
Q80UU9	5	4	282.77	0.213213	1.14197	wild type	PD-L1-KO	Membrane-associated progesterone receptor component 2 OS=Mus musculus GN=Pgrmc2 PE=1 SV=2 - [PGRC2_MOUSE]	373466	367465	365682	262999	294496	286207	323783	294853	748200	300901	425462	375165	475569	436824	323783	413060	2	2	3	2	3	2	2	3
P68033	119	13	4985.87	0.213256	1.56705	wild type	PD-L1-KO	Actin, alpha cardiac muscle 1 OS=Mus musculus GN=Actc1 PE=1 SV=1 - [ACTC_MOUSE]	6.87507e+07	4.15676e+07	5.47607e+07	2.31033e+07	3.69994e+07	1.76018e+07	4.22163e+07	2.32696e+07	1.37735e+08	3.40379e+07	6.37127e+07	3.29566e+07	5.97489e+07	2.68648e+07	4.22163e+07	3.25983e+07	49	30	49	22	43	15	40	28
Q9EQN3	2	2	143.1	0.213657	1.66777	wild type	PD-L1-KO	TSC22 domain family protein 4 OS=Mus musculus GN=Tsc22d4 PE=2 SV=2 - [T22D4_MOUSE]	64954.3	88559.7	28241.1	96657	31277.7	38117.8	66870.8	30670.2	130129	72517.6	32857.9	137880	50509	58177.5	66870.8	42965.9	1	2	2	2	2	1	2	0
P50396	8	3	360.45	0.213694	1.82307	wild type	PD-L1-KO	Rab GDP dissociation inhibitor alpha OS=Mus musculus GN=Gdi1 PE=1 SV=3 - [GDIA_MOUSE]	308234	300295	367704	257368	263324	184980	219924	8434.71	617514	245898	427815	367132	425230	282327	219924	11816.2	1	1	1	1	1	1	0	0
P57759	7	7	363.35	0.213826	1.32676	wild type	PD-L1-KO	Endoplasmic reticulum resident protein 29 OS=Mus musculus GN=Erp29 PE=1 SV=2 - [ERP29_MOUSE]	1.42358e+06	1.7609e+06	1.62228e+06	1.30561e+06	1.6049e+06	624665	1.66899e+06	708421	2.85199e+06	1.44192e+06	1.88748e+06	1.86244e+06	2.59169e+06	953396	1.66899e+06	992426	2	3	4	2	3	2	2	2
Q9JJA4	2	2	62.16	0.214074	1.33393	PD-L1-KO	wild type	Ribosome biogenesis protein WDR12 OS=Mus musculus GN=Wdr12 PE=2 SV=1 - [WDR12_MOUSE]	42299.1	41681.1	43133.1	70099	50722.5	99230.5	59316.9	53798.2	84741.7	34130.8	50184.4	99995.3	81909.7	151451	59316.9	75365.9	0	0	0	0	0	0	1	1
Q99KN9	6	6	308.39	0.214768	1.25001	wild type	PD-L1-KO	Clathrin interactor 1 OS=Mus musculus GN=Clint1 PE=1 SV=2 - [EPN4_MOUSE]	174498	187255	185647	191275	168287	166955	177364	78325.7	349588	153334	215996	272851	271760	254816	177364	109726	2	1	1	1	1	2	1	0
P16332	2	2	82.56	0.215284	2.30184	PD-L1-KO	wild type	Methylmalonyl-CoA mutase, mitochondrial OS=Mus musculus GN=Mut PE=2 SV=2 - [MUTA_MOUSE]	11662.4	14766.5	164.518	10200.7	23085	10426.3	35497.5	15685.3	23364.4	12091.6	191.413	14551.2	37279.1	15913.1	35497.5	21973.6	0	0	1	0	2	0	1	0
O35350	16	16	854.94	0.216088	1.18125	wild type	PD-L1-KO	Calpain-1 catalytic subunit OS=Mus musculus GN=Capn1 PE=2 SV=1 - [CAN1_MOUSE]	835986	817981	592743	616027	682565	502482	675399	563033	1.67481e+06	669808	689642	878754	1.10225e+06	766915	675399	788753	4	6	8	7	7	2	6	7
Q9WUU7	2	2	36.38	0.216215	1.56649	PD-L1-KO	wild type	Cathepsin Z OS=Mus musculus GN=Ctsz PE=2 SV=1 - [CATZ_MOUSE]	38640.7	60823.6	37933.4	17871.7	53822.2	31517	91010.8	66878.7	77412.5	49805.7	44134.6	25493.8	86915.2	48102.9	91010.8	93690.4	0	0	0	0	0	0	2	1
Q9Z0M6	1	1	48.67	0.216526	1.90203	PD-L1-KO	wild type	CD97 antigen OS=Mus musculus GN=Cd97 PE=1 SV=2 - [CD97_MOUSE]	6414.45	5411.44	6250.94	210.4	11492.6	9545.48	7996.48	5748.31	12850.7	4431.18	7272.82	300.133	18558.9	14568.8	7996.48	8052.8	0	0	0	0	1	1	1	0
Q00651	6	6	223.78	0.216547	1.34712	PD-L1-KO	wild type	Integrin alpha-4 OS=Mus musculus GN=Itga4 PE=1 SV=1 - [ITA4_MOUSE]	550341	521261	626018	606739	929787	472278	657892	1.04429e+06	1.10255e+06	426838	728356	865505	1.50147e+06	720815	657892	1.46294e+06	2	2	5	2	3	0	1	2
Q80UM7	10	9	388.34	0.216751	1.16527	PD-L1-KO	wild type	Mannosyl-oligosaccharide glucosidase OS=Mus musculus GN=Mogs PE=2 SV=1 - [MOGS_MOUSE]	357521	442032	430260	473122	435300	634923	448836	465320	716255	361960	500597	674903	702948	969052	448836	651866	3	3	6	5	4	3	6	2
Q9CR51	1	1	50.03	0.216759	1.56392	PD-L1-KO	wild type	V-type proton ATPase subunit G 1 OS=Mus musculus GN=Atp6v1g1 PE=2 SV=3 - [VATG1_MOUSE]	2245.44	1209.67	3371.41	7175.38	5496.7	7003.76	6630.33	2767.04	4498.51	990.545	3922.55	10235.6	8876.39	10689.5	6630.33	3876.35	0	0	0	1	1	0	0	0
Q8R5K4	2	2	57.73	0.217075	1.41629	PD-L1-KO	wild type	Nucleolar protein 6 OS=Mus musculus GN=Nol6 PE=2 SV=2 - [NOL6_MOUSE]	10441.8	17525.5	16755.9	22471.1	20605.1	14270.7	26782.4	33508.8	20919.1	14350.8	19495.1	32054.8	33274.3	21780.7	26782.4	46942.4	0	0	1	1	1	0	0	0
Q08775	4	1	173.12	0.217473	1.55724	wild type	PD-L1-KO	Runt-related transcription factor 2 OS=Mus musculus GN=Runx2 PE=1 SV=2 - [RUNX2_MOUSE]	17420.4	18746.2	17410.3	32000.5	2487.66	21480	406.487	30580.5	34900	15350.4	20256.5	45648.3	4017.21	32783.9	406.487	42840.1	0	1	0	1	0	0	0	1
Q60597	28	28	1300.43	0.217946	1.17242	PD-L1-KO	wild type	2-oxoglutarate dehydrogenase, mitochondrial OS=Mus musculus GN=Ogdh PE=1 SV=3 - [ODO1_MOUSE]	1.92339e+06	2.06755e+06	1.82132e+06	1.78663e+06	2.60868e+06	2.39642e+06	2.26163e+06	1.64235e+06	3.8533e+06	1.69303e+06	2.11907e+06	2.5486e+06	4.21265e+06	3.65754e+06	2.26163e+06	2.30077e+06	6	5	17	9	18	5	10	9
Q91VU0	1	1	85.75	0.218737	1.45947	wild type	PD-L1-KO	Protein FAM3C OS=Mus musculus GN=Fam3c PE=1 SV=1 - [FAM3C_MOUSE]	75282.6	75539	45677.8	56406	59086.1	48574.2	14074.2	51551	150821	61855.5	53145	80462.4	95415.7	74136.5	14074.2	72217.8	1	0	1	0	0	0	0	0
Q8BGH2	2	2	94.04	0.21908	1.15046	wild type	PD-L1-KO	Sorting and assembly machinery component 50 homolog OS=Mus musculus GN=Samm50 PE=1 SV=1 - [SAM50_MOUSE]	63199	82279.8	77360.8	67318.2	60073.5	70650.9	71964.5	49520.8	126612	67375.3	90007.4	96028.5	97010.2	107831	71964.5	69373.6	1	1	1	1	2	1	1	1
Q8K1E0	4	4	158.09	0.219334	1.27533	PD-L1-KO	wild type	Syntaxin-5 OS=Mus musculus GN=Stx5 PE=1 SV=3 - [STX5_MOUSE]	31236.9	50506.1	31693	61313.1	42821.3	66727	62783.7	50530	62579.8	41357.2	36874	87462.3	69150.3	101842	62783.7	70787.4	1	0	1	1	1	1	1	1
Q99JY3	8	8	503.6	0.219687	1.17752	wild type	PD-L1-KO	GTPase IMAP family member 4 OS=Mus musculus GN=Gimap4 PE=1 SV=1 - [GIMA4_MOUSE]	3.05175e+06	3.34447e+06	3.26192e+06	3.52674e+06	2.18748e+06	3.64797e+06	3.21723e+06	2.1445e+06	6.11386e+06	2.73863e+06	3.79517e+06	5.03085e+06	3.53247e+06	5.56772e+06	3.21723e+06	3.00424e+06	9	8	8	8	7	12	10	5
P53702	2	2	112.94	0.220221	1.33746	PD-L1-KO	wild type	Cytochrome c-type heme lyase OS=Mus musculus GN=Hccs PE=2 SV=2 - [CCHL_MOUSE]	45566	73273.2	86940.6	150886	91710.1	148063	108914	128340	91286.7	60000.1	101153	215237	148099	225981	108914	179791	1	1	1	0	1	2	1	1
P35278	5	4	274.21	0.220288	1.67378	wild type	PD-L1-KO	Ras-related protein Rab-5C OS=Mus musculus GN=Rab5c PE=1 SV=2 - [RAB5C_MOUSE]	123879	173035	253663	189633	123913	181266	122747	14312.9	248178	141691	295131	270509	200102	276658	122747	20050.9	0	1	2	1	2	0	1	0
Q8BVE8	1	1	31.05	0.220993	5.84885	PD-L1-KO	wild type	Histone-lysine N-methyltransferase NSD2 OS=Mus musculus GN=Whsc1 PE=1 SV=2 - [NSD2_MOUSE]	2265.72	2213.98	1987.24	6899.66	4127.96	15600.5	1687.99	56762.8	4539.12	1812.93	2312.1	9842.28	6666.08	23810.3	1687.99	79518.9	0	0	0	1	0	0	0	0
P68368	30	6	1672.48	0.221348	1.30244	wild type	PD-L1-KO	Tubulin alpha-4A chain OS=Mus musculus GN=Tuba4a PE=1 SV=1 - [TBA4A_MOUSE]	1.29604e+06	1.41785e+06	1.05056e+06	1.27919e+06	577105	1.65427e+06	1.05805e+06	583032	2.59648e+06	1.16101e+06	1.2223e+06	1.82475e+06	931943	2.52483e+06	1.05805e+06	816769	6	5	6	4	5	5	5	2
Q4FK66	2	2	106.28	0.221354	2.65977	PD-L1-KO	wild type	Pre-mRNA-splicing factor 38A OS=Mus musculus GN=Prpf38a PE=1 SV=1 - [PR38A_MOUSE]	103147	127683	88814.3	142478	102194	169900	151842	805204	206644	104554	103333	203243	165028	259311	151842	1.12801e+06	1	1	2	0	2	1	1	0
Q9JHC9	1	1	23.86	0.221409	1.33038	wild type	PD-L1-KO	ETS-related transcription factor Elf-2 OS=Mus musculus GN=Elf2 PE=1 SV=1 - [ELF2_MOUSE]	5339.31	8466.58	6239.61	6970.89	2713.28	6589.9	7431.03	3573.03	10696.7	6932.91	7259.63	9943.89	4381.56	10057.8	7431.03	5005.45	0	0	0	1	1	0	1	0
P47968	1	1	36.69	0.221876	1.32955	wild type	PD-L1-KO	Ribose-5-phosphate isomerase OS=Mus musculus GN=Rpia PE=2 SV=2 - [RPIA_MOUSE]	82920.7	77884	62725	41795.3	52462.2	55415.1	58321.3	33360.8	166123	63775.7	72979	59620.4	84719.1	84577.5	58321.3	46735.2	0	0	1	0	0	0	0	0
P37040	5	5	253.14	0.222905	1.15782	wild type	PD-L1-KO	NADPH--cytochrome P450 reductase OS=Mus musculus GN=Por PE=1 SV=2 - [NCPR_MOUSE]	194880	223829	242146	171302	182249	143029	196373	197075	390420	183283	281731	244361	294306	218299	196373	276083	2	1	2	1	3	1	1	2
P62874	16	12	1017	0.22315	1.55065	wild type	PD-L1-KO	Guanine nucleotide-binding protein G(I)/G(S)/G(T) subunit beta-1 OS=Mus musculus GN=Gnb1 PE=1 SV=3 - [GBB1_MOUSE]	401495	623325	834417	1.02117e+06	536343	470746	678574	171886	804353	510413	970824	1.45669e+06	866117	718478	678574	240795	5	3	5	4	4	3	3	1
Q9CPU2	1	1	21.63	0.223483	1.7232	PD-L1-KO	wild type	NADH dehydrogenase [ubiquinone] 1 beta subcomplex subunit 2, mitochondrial OS=Mus musculus GN=Ndufb2 PE=3 SV=1 - [NDUB2_MOUSE]	588.161	4432.42	18769.1	32547.7	27956.3	10742.5	24650.7	33731.3	1178.32	3629.51	21837.4	46428.9	45145.4	16395.7	24650.7	47254.1	0	1	0	1	1	0	0	0
P25444	7	7	263.67	0.224861	1.21226	wild type	PD-L1-KO	40S ribosomal protein S2 OS=Mus musculus GN=Rps2 PE=1 SV=3 - [RS2_MOUSE]	769672	858159	798511	562888	659862	773090	582330	450559	1.54195e+06	702708	929048	802952	1.06558e+06	1.17993e+06	582330	631188	2	1	5	2	4	2	1	3
Q0VGB7	2	2	102.35	0.225527	1.30527	PD-L1-KO	wild type	Serine/threonine-protein phosphatase 4 regulatory subunit 2 OS=Mus musculus GN=Ppp4r2 PE=1 SV=1 - [PP4R2_MOUSE]	87252.2	94609.2	56298.1	39220	86416.7	113100	93924.1	68614.8	174800	77471.2	65501.5	55946.9	139551	172619	93924.1	96122.5	1	1	1	1	1	0	1	1
Q922S8	2	2	73.32	0.227199	2.04859	PD-L1-KO	wild type	Kinesin-like protein KIF2C OS=Mus musculus GN=Kif2c PE=1 SV=1 - [KIF2C_MOUSE]	13540.4	18172.3	9571.45	23306	68510.4	32589.8	12262.4	18955.9	27126.8	14880.5	11136.1	33245.8	110635	49740.4	12262.4	26555.4	0	0	1	1	2	1	0	1
P39688	6	4	375.02	0.227215	1.2355	wild type	PD-L1-KO	Tyrosine-protein kinase Fyn OS=Mus musculus GN=Fyn PE=1 SV=4 - [FYN_MOUSE]	238722	227612	188511	163939	156966	120245	245979	139526	478254	186381	219328	233856	253478	183524	245979	195462	3	0	3	2	1	1	1	0
Q62203	1	1	21.45	0.228136	1.48725	PD-L1-KO	wild type	Splicing factor 3A subunit 2 OS=Mus musculus GN=Sf3a2 PE=2 SV=2 - [SF3A2_MOUSE]	0	412.226	13901.1	775.39	7795.86	1228.31	3389.33	10027.2	0	337.554	16173.6	1106.08	12589.2	1874.71	3389.33	14047.1	0	0	1	0	0	0	0	0
Q571I9	5	3	260.28	0.229331	1.36869	wild type	PD-L1-KO	Aldehyde dehydrogenase family 16 member A1 OS=Mus musculus GN=Aldh16a1 PE=2 SV=2 - [A16A1_MOUSE]	87342.5	84434.7	67955.8	48212.5	58768.9	71692	54543.2	25375.7	174981	69139.8	79064.9	68774.6	94903.4	109420	54543.2	35548.8	1	1	1	1	1	2	2	2
Q7TQK4	1	1	29.03	0.22984	13.4372	PD-L1-KO	wild type	Exosome complex component RRP40 OS=Mus musculus GN=Exosc3 PE=1 SV=3 - [EXOS3_MOUSE]	0	178.651	9784.75	999.336	141972	1060.5	721.141	3555.4	0	146.289	11384.3	1425.54	229264	1618.59	721.141	4980.75	0	0	0	0	1	0	0	0
Q921N6	2	2	69.76	0.229857	1.42963	wild type	PD-L1-KO	Probable ATP-dependent RNA helicase DDX27 OS=Mus musculus GN=Ddx27 PE=1 SV=3 - [DDX27_MOUSE]	17300.1	20679.1	17290.1	28311.5	18944.7	21791.2	12881.7	4845.6	34658.8	16933.2	20116.6	40386	30593.1	33258.9	12881.7	6788.2	0	0	1	0	1	1	0	0
Q61107	5	2	117.45	0.229991	1.84123	wild type	PD-L1-KO	Guanylate-binding protein 4 OS=Mus musculus GN=Gbp4 PE=1 SV=1 - [GBP4_MOUSE]	49206.1	47819.9	90945.9	142154	81034.9	68620.5	25986.4	3654.77	98579.1	39157.6	105813	202781	130860	104732	25986.4	5119.96	0	0	1	0	0	0	1	0
Q9JI13	1	1	66.79	0.230218	1.3841	PD-L1-KO	wild type	Something about silencing protein 10 OS=Mus musculus GN=Utp3 PE=1 SV=1 - [SAS10_MOUSE]	23453	35500	22223.2	39889.4	31840.8	65940.1	39241.5	30544.4	46985.5	29069.4	25856.2	56901.8	51418.3	100641	39241.5	42789.7	1	1	0	1	1	1	1	0
P35980	11	11	661.1	0.230379	1.37361	wild type	PD-L1-KO	60S ribosomal protein L18 OS=Mus musculus GN=Rpl18 PE=2 SV=3 - [RL18_MOUSE]	2.43428e+06	1.92573e+06	1.72947e+06	983604	1.47815e+06	1.28832e+06	1.33498e+06	1.0478e+06	4.87682e+06	1.57689e+06	2.01219e+06	1.4031e+06	2.38701e+06	1.9663e+06	1.33498e+06	1.46786e+06	10	5	6	4	6	4	5	7
Q8VCH5	1	1	42.12	0.23177	1.30984	PD-L1-KO	wild type	Rab9 effector protein with kelch motifs OS=Mus musculus GN=Rabepk PE=2 SV=2 - [RABEK_MOUSE]	7209.02	11245.7	13659.6	11841.9	12650.1	14445.4	10214.9	20265.1	14442.5	9208.6	15892.6	16892.3	20428.1	22047.4	10214.9	28389.4	0	0	0	1	0	0	0	0
Q99JT2	10	3	468.93	0.233146	1.2236	wild type	PD-L1-KO	Serine/threonine-protein kinase MST4 OS=Mus musculus GN=Mst4 PE=2 SV=1 - [MST4_MOUSE]	176744	135161	150250	132850	174324	79119.8	127235	105595	354087	110678	174812	189509	281508	120757	127235	147928	0	0	1	1	1	0	2	1
P60710	175	8	8739.28	0.233497	1.86479	wild type	PD-L1-KO	Actin, cytoplasmic 1 OS=Mus musculus GN=Actb PE=1 SV=1 - [ACTB_MOUSE]	567314	801178	2.30472e+06	976643	822509	467721	1.07348e+06	129792	1.13655e+06	656049	2.68148e+06	1.39317e+06	1.32824e+06	713861	1.07348e+06	181825	0	3	5	2	0	0	2	0
Q149F1	1	1	40.34	0.234906	3.43655	PD-L1-KO	wild type	RNA pseudouridylate synthase domain-containing protein 2 OS=Mus musculus GN=Rpusd2 PE=2 SV=2 - [RUSD2_MOUSE]	5966.21	11620.6	1755.7	2721.92	2422.29	48391.2	15527.5	9484.51	11952.7	9515.56	2042.72	3882.78	3911.66	73857.1	15527.5	13286.8	0	0	0	0	0	1	0	0
Q9D958	2	2	85.41	0.234993	1.16468	wild type	PD-L1-KO	Signal peptidase complex subunit 1 OS=Mus musculus GN=Spcs1 PE=2 SV=3 - [SPCS1_MOUSE]	193476	223032	241771	256815	214759	142274	232088	196582	387609	182631	281294	366343	346806	217147	232088	275391	2	2	1	0	2	2	0	2
Q8C3P7	4	4	111.07	0.235167	1.68107	wild type	PD-L1-KO	N6-adenosine-methyltransferase 70 kDa subunit OS=Mus musculus GN=Mettl3 PE=2 SV=2 - [MTA70_MOUSE]	18538.8	24636.6	41325.3	34013.1	21294.9	18590.3	28535.2	2078.67	37140.6	20173.8	48081	48519.2	34388.2	28373.5	28535.2	2912.01	0	0	1	2	1	0	1	0
P61514	1	1	100.3	0.235342	1.38617	wild type	PD-L1-KO	60S ribosomal protein L37a OS=Mus musculus GN=Rpl37a PE=2 SV=2 - [RL37A_MOUSE]	408187	271386	381945	193847	282563	183147	302781	137145	817759	222226	444383	276520	456299	279529	302781	192126	2	1	2	1	1	2	2	2
Q9QZH6	1	1	17.29	0.236527	1.18983	wild type	PD-L1-KO	Evolutionarily conserved signaling intermediate in Toll pathway, mitochondrial OS=Mus musculus GN=Ecsit PE=1 SV=2 - [ECSIT_MOUSE]	29282.8	31809.8	31250.7	30586.5	32778.5	18288.1	32730.2	19520.7	58664.8	26047.7	36359.5	43631.3	52932.6	27912.2	32730.2	27346.6	0	0	0	0	1	0	0	0
Q68FL4	1	1	40.13	0.236727	1.62415	wild type	PD-L1-KO	Putative adenosylhomocysteinase 3 OS=Mus musculus GN=Ahcyl2 PE=1 SV=1 - [SAHH3_MOUSE]	31117	21957.6	21381.5	8870.46	16179.6	6363.63	13226.4	15535.1	62339.5	17980.1	24876.9	12653.6	26127.7	9712.5	13226.4	21763.1	0	0	1	0	0	0	0	0
P05555	1	1	34.78	0.237116	1.36001	PD-L1-KO	wild type	Integrin alpha-M OS=Mus musculus GN=Itgam PE=1 SV=2 - [ITAM_MOUSE]	2048.53	3002.84	11240.1	1355.72	5342.3	5002.99	4942.62	8712.38	4104.01	2458.9	13077.5	1933.92	8627.05	7635.82	4942.62	12205.2	0	0	1	0	0	0	0	1
Q9ERE7	1	1	38.14	0.23728	1.20272	PD-L1-KO	wild type	LDLR chaperone MESD OS=Mus musculus GN=Mesdc2 PE=1 SV=1 - [MESD_MOUSE]	6646.75	13318.5	11391.4	8125.13	12699	10178.4	12252.5	12355.7	13316	10906	13253.6	11590.4	20507	15534.8	12252.5	17309.1	0	0	0	0	0	0	0	1
Q8BNW9	3	3	145.65	0.23768	1.8677	PD-L1-KO	wild type	Kelch repeat and BTB domain-containing protein 11 OS=Mus musculus GN=Kbtbd11 PE=1 SV=3 - [KBTBB_MOUSE]	61420.7	40566.4	31229.4	56402.2	57412.6	191840	61357.5	43539.8	123050	33218	36334.6	80457	92713.2	292796	61357.5	60994.8	1	0	1	1	2	0	2	1
Q99L45	13	13	607.79	0.238249	1.25477	wild type	PD-L1-KO	Eukaryotic translation initiation factor 2 subunit 2 OS=Mus musculus GN=Eif2s2 PE=1 SV=1 - [IF2B_MOUSE]	456463	410799	483483	263001	293336	360394	370056	262302	914475	336385	562521	375167	473697	550052	370056	367458	7	2	7	2	5	2	1	3
Q9EPU0	17	15	792.94	0.239165	1.18805	wild type	PD-L1-KO	Regulator of nonsense transcripts 1 OS=Mus musculus GN=Upf1 PE=1 SV=2 - [RENT1_MOUSE]	559267	446248	407813	462811	282696	532765	368209	395507	1.12043e+06	365413	474481	660194	456514	813135	368209	554066	4	2	7	4	8	2	2	1
P08113	30	28	1474.5	0.239578	1.13969	wild type	PD-L1-KO	Endoplasmin OS=Mus musculus GN=Hsp90b1 PE=1 SV=2 - [ENPL_MOUSE]	8.31563e+06	8.00031e+06	6.36602e+06	6.18761e+06	6.81168e+06	6.55019e+06	6.71297e+06	5.25629e+06	1.66595e+07	6.5511e+06	7.40671e+06	8.82655e+06	1.09999e+07	9.99725e+06	6.71297e+06	7.36353e+06	22	21	21	13	22	22	13	12
Q8K1R3	6	6	128.77	0.240405	1.52842	wild type	PD-L1-KO	Polyribonucleotide nucleotidyltransferase 1, mitochondrial OS=Mus musculus GN=Pnpt1 PE=1 SV=1 - [PNPT1_MOUSE]	43828.7	40766.6	30043.8	66308	17019.3	64063.9	33170.6	4134.41	87806.1	33382	34955.3	94587.5	27483.7	97777.7	33170.6	5791.9	1	0	0	1	2	1	0	1
Q9CR62	1	1	29.92	0.240638	1.53346	wild type	PD-L1-KO	Mitochondrial 2-oxoglutarate/malate carrier protein OS=Mus musculus GN=Slc25a11 PE=1 SV=3 - [M2OM_MOUSE]	204967	124910	124037	81454.7	155877	24106.5	74406.3	94735.6	410629	102283	144314	116194	251719	36792.6	74406.3	132715	0	0	0	0	1	0	0	0
P18572	3	3	101.41	0.240703	1.97978	PD-L1-KO	wild type	Basigin OS=Mus musculus GN=Bsg PE=1 SV=2 - [BASI_MOUSE]	106548	109525	47520	158040	121156	440698	84765.1	188121	213458	89685.4	55288.4	225443	195650	672617	84765.1	263539	1	1	1	0	1	3	0	1
G5E829	8	7	330.68	0.241008	1.34353	wild type	PD-L1-KO	Plasma membrane calcium-transporting ATPase 1 OS=Mus musculus GN=Atp2b1 PE=1 SV=1 - [AT2B1_MOUSE]	241265	276451	299917	232770	288453	71727.7	257830	163813	483349	226373	348947	332043	465811	109475	257830	229486	2	1	6	1	5	0	2	3
O88291	2	2	176.55	0.241217	1.39568	wild type	PD-L1-KO	DBIRD complex subunit ZNF326 OS=Mus musculus GN=Znf326 PE=1 SV=1 - [ZN326_MOUSE]	35478.5	52482.9	41825.6	48930.4	46440.9	10637	62851	8121.15	71077.4	42975.9	48663.1	69798.5	74995.4	16234.7	62851	11376.9	1	1	1	1	1	0	1	0
Q9EQR5	5	5	311.38	0.241529	1.174	wild type	PD-L1-KO	Lck-interacting transmembrane adapter 1 OS=Mus musculus GN=Lime1 PE=1 SV=1 - [LIME1_MOUSE]	85586.1	103058	75532.7	104288	73974.9	98727.5	80932.4	60219.3	171462	84389.4	87880.4	148766	119459	150683	80932.4	84361.2	1	0	2	2	1	1	2	1
P49443	2	2	49.3	0.242127	2.30739	wild type	PD-L1-KO	Protein phosphatase 1A OS=Mus musculus GN=Ppm1a PE=1 SV=1 - [PPM1A_MOUSE]	45605	38865.7	24013.9	5783.93	7820.82	10258.3	22764.7	8678.93	91364.7	31825.4	27939.6	8250.7	12629.5	15656.7	22764.7	12158.3	0	0	2	0	0	0	0	0
P63101	27	18	1446.19	0.242162	1.21711	wild type	PD-L1-KO	14-3-3 protein zeta/delta OS=Mus musculus GN=Ywhaz PE=1 SV=1 - [1433Z_MOUSE]	1.35895e+07	1.38762e+07	1.14492e+07	9.87762e+06	9.9472e+06	7.82802e+06	1.47338e+07	7.57987e+06	2.72251e+07	1.13626e+07	1.33209e+07	1.40903e+07	1.60633e+07	1.19475e+07	1.47338e+07	1.06186e+07	19	15	16	15	14	13	16	12
P54254	2	2	76.63	0.242403	1.27374	wild type	PD-L1-KO	Ataxin-1 OS=Mus musculus GN=Atxn1 PE=1 SV=2 - [ATX1_MOUSE]	56031.3	72072.1	53471.2	64011.6	26940.7	34576.7	48718.5	82571.2	112253	59016.7	62212.4	91311.7	43505.4	52772.8	48718.5	115674	0	0	2	0	0	0	0	0
P61924	5	5	297.74	0.242534	9.48806	PD-L1-KO	wild type	Coatomer subunit zeta-1 OS=Mus musculus GN=Copz1 PE=2 SV=1 - [COPZ1_MOUSE]	91404.7	259976	319624	213202	271711	290785	254464	7.57244e+06	183120	212883	371874	304129	438774	443812	254464	1.06082e+07	0	0	3	0	2	0	0	0
Q9QZQ8	29	29	1597.96	0.242658	1.21123	wild type	PD-L1-KO	Core histone macro-H2A.1 OS=Mus musculus GN=H2afy PE=1 SV=3 - [H2AY_MOUSE]	5.22753e+06	5.50965e+06	4.53849e+06	4.81427e+06	3.96026e+06	3.5228e+06	6.39262e+06	2.71069e+06	1.04728e+07	4.51161e+06	5.28042e+06	6.86749e+06	6.39525e+06	5.37669e+06	6.39262e+06	3.79741e+06	22	15	18	12	18	6	22	13
Q9WU78	24	24	1149.83	0.243436	1.08407	wild type	PD-L1-KO	Programmed cell death 6-interacting protein OS=Mus musculus GN=Pdcd6ip PE=1 SV=3 - [PDC6I_MOUSE]	1.36188e+06	1.58215e+06	1.45424e+06	1.39378e+06	1.246e+06	1.54059e+06	1.35865e+06	1.19766e+06	2.72839e+06	1.29555e+06	1.69197e+06	1.98821e+06	2.01211e+06	2.35132e+06	1.35865e+06	1.6778e+06	8	8	12	9	12	10	10	10
P62962	42	42	2471.27	0.24348	1.20341	wild type	PD-L1-KO	Profilin-1 OS=Mus musculus GN=Pfn1 PE=1 SV=2 - [PROF1_MOUSE]	8.23971e+07	8.10487e+07	6.536e+07	5.48809e+07	5.20354e+07	5.62631e+07	7.96403e+07	4.77966e+07	1.65074e+08	6.63672e+07	7.60448e+07	7.82869e+07	8.40298e+07	8.58718e+07	7.96403e+07	6.69582e+07	82	68	81	67	65	56	74	60
Q62318	19	19	762.59	0.243542	1.19264	PD-L1-KO	wild type	Transcription intermediary factor 1-beta OS=Mus musculus GN=Trim28 PE=1 SV=3 - [TIF1B_MOUSE]	1.36361e+06	1.31903e+06	990294	1.27156e+06	1.25568e+06	1.97825e+06	1.37585e+06	1.28721e+06	2.73184e+06	1.08009e+06	1.15218e+06	1.81387e+06	2.02774e+06	3.0193e+06	1.37585e+06	1.80326e+06	2	2	9	5	10	5	8	8
Q9CX86	16	11	891.35	0.243697	1.30623	wild type	PD-L1-KO	Heterogeneous nuclear ribonucleoprotein A0 OS=Mus musculus GN=Hnrnpa0 PE=1 SV=1 - [ROA0_MOUSE]	3.10335e+06	4.44189e+06	2.47288e+06	2.93242e+06	2.70296e+06	1.90092e+06	3.7905e+06	1.52004e+06	6.21722e+06	3.63727e+06	2.87713e+06	4.18306e+06	4.3649e+06	2.90128e+06	3.7905e+06	2.12943e+06	8	5	7	4	8	4	7	3
Q6ZWV7	2	2	41.41	0.24378	1.73299	PD-L1-KO	wild type	60S ribosomal protein L35 OS=Mus musculus GN=Rpl35 PE=2 SV=1 - [RL35_MOUSE]	912.707	4586.5	54141.9	22284.2	63913.4	10703.5	32677.7	34680.9	1828.51	3755.68	62992.8	31788.1	103211	16336.3	32677.7	48584.5	0	0	1	1	2	0	0	1
Q9CVB6	22	22	924.92	0.244052	1.1845	wild type	PD-L1-KO	Actin-related protein 2/3 complex subunit 2 OS=Mus musculus GN=Arpc2 PE=1 SV=3 - [ARPC2_MOUSE]	3.08646e+06	3.38533e+06	2.82182e+06	3.40046e+06	2.73383e+06	1.71899e+06	3.3596e+06	2.90443e+06	6.18339e+06	2.77209e+06	3.28312e+06	4.85072e+06	4.41476e+06	2.62361e+06	3.3596e+06	4.06881e+06	17	18	22	12	24	13	25	16
Q91YT0	10	8	736.17	0.244241	1.24212	wild type	PD-L1-KO	NADH dehydrogenase [ubiquinone] flavoprotein 1, mitochondrial OS=Mus musculus GN=Ndufv1 PE=1 SV=1 - [NDUV1_MOUSE]	1.47357e+06	2.03089e+06	1.80427e+06	2.07108e+06	1.82891e+06	1.59963e+06	1.66926e+06	843540	2.95214e+06	1.66301e+06	2.09922e+06	2.95437e+06	2.95342e+06	2.44144e+06	1.66926e+06	1.18172e+06	8	5	8	6	6	6	8	7
P58281	1	1	43.88	0.244478	1.53842	wild type	PD-L1-KO	Dynamin-like 120 kDa protein, mitochondrial OS=Mus musculus GN=Opa1 PE=1 SV=1 - [OPA1_MOUSE]	104868	122675	57588.8	68534.9	59294.7	147901	1487.84	21205.4	210091	100453	67003.2	97764.2	95752.5	225734	1487.84	29706.6	0	0	1	0	1	0	0	0
Q9CQR4	2	2	120.01	0.244577	1.26743	wild type	PD-L1-KO	Acyl-coenzyme A thioesterase 13 OS=Mus musculus GN=Acot13 PE=1 SV=1 - [ACO13_MOUSE]	202406	322739	208020	197815	265391	151282	190077	127793	405498	264277	242027	282181	428569	230894	190077	179025	1	0	1	0	1	0	1	0
Q8BSP2	2	2	146.43	0.245153	1.33651	wild type	PD-L1-KO	Condensin-2 complex subunit H2 OS=Mus musculus GN=Ncaph2 PE=1 SV=1 - [CNDH2_MOUSE]	109519	59500.5	108761	113967	68477.7	117973	50677.8	55984.3	219410	48722.3	126541	162573	110582	180056	50677.8	78428.4	0	0	2	0	1	0	1	0
Q60902	3	3	230.13	0.245324	1.25182	wild type	PD-L1-KO	Epidermal growth factor receptor substrate 15-like 1 OS=Mus musculus GN=Eps15l1 PE=1 SV=3 - [EP15R_MOUSE]	167380	152836	106909	110598	113847	130722	115842	69140.9	335327	125150	124386	157766	183846	199514	115842	96859.4	2	1	3	2	3	2	2	1
Q9D6Z1	16	16	877.45	0.245681	1.38347	wild type	PD-L1-KO	Nucleolar protein 56 OS=Mus musculus GN=Nop56 PE=1 SV=2 - [NOP56_MOUSE]	1.11143e+06	1.52605e+06	765730	1.43553e+06	945434	1.36662e+06	762173	423315	2.22664e+06	1.24961e+06	890908	2.04776e+06	1.52674e+06	2.08581e+06	762173	593021	5	4	8	6	10	6	8	6
Q99KI0	31	31	1646.61	0.245928	1.31184	wild type	PD-L1-KO	Aconitate hydratase, mitochondrial OS=Mus musculus GN=Aco2 PE=1 SV=1 - [ACON_MOUSE]	1.12735e+07	1.50743e+07	1.14437e+07	8.365e+06	1.42058e+07	6.14765e+06	9.54176e+06	5.28934e+06	2.25852e+07	1.23437e+07	1.33145e+07	1.19326e+07	2.29404e+07	9.38287e+06	9.54176e+06	7.40983e+06	22	14	21	14	22	19	16	16
Q8K224	6	6	250.11	0.245949	1.39894	PD-L1-KO	wild type	N-acetyltransferase 10 OS=Mus musculus GN=Nat10 PE=2 SV=1 - [NAT10_MOUSE]	80097.9	103453	107370	138881	107514	252346	122535	118870	160468	84713.1	124922	198111	173620	385144	122535	166525	0	1	3	3	3	2	4	3
P09055	8	8	269.71	0.246596	1.21871	PD-L1-KO	wild type	Integrin beta-1 OS=Mus musculus GN=Itgb1 PE=1 SV=1 - [ITB1_MOUSE]	291978	331781	292626	293532	339221	325457	522797	287063	584946	271681	340463	418720	547794	496730	522797	402147	3	3	4	2	3	2	4	3
Q149F3	4	2	172.89	0.246751	1.73664	wild type	PD-L1-KO	Eukaryotic peptide chain release factor GTP-binding subunit ERF3B OS=Mus musculus GN=Gspt2 PE=1 SV=1 - [ERF3B_MOUSE]	14278.9	46241.6	23228.3	16287.4	16508.2	2789.99	25691.3	12613.6	28606.3	37865.2	27025.5	23233.7	26658.4	4258.24	25691.3	17670.4	0	1	0	0	0	0	0	0
Q8K2K6	11	11	564.35	0.246868	1.42761	wild type	PD-L1-KO	Arf-GAP domain and FG repeat-containing protein 1 OS=Mus musculus GN=Agfg1 PE=1 SV=2 - [AGFG1_MOUSE]	907647	817582	1.22375e+06	1.18014e+06	891240	884702	920715	195682	1.81837e+06	669481	1.4238e+06	1.68346e+06	1.43923e+06	1.35028e+06	920715	274131	2	2	5	3	4	3	5	2
Q04447	2	2	49.84	0.246869	1.53321	wild type	PD-L1-KO	Creatine kinase B-type OS=Mus musculus GN=Ckb PE=1 SV=1 - [KCRB_MOUSE]	61317.8	65644.2	30906.6	30001.3	9152.17	56384.6	44983.3	12013.4	122844	53753.1	35959.1	42796.4	14779.5	86057.1	44983.3	16829.6	1	0	0	1	0	0	0	0
Q9JM90	2	2	62.33	0.246958	1.17571	wild type	PD-L1-KO	Signal-transducing adaptor protein 1 OS=Mus musculus GN=Stap1 PE=1 SV=1 - [STAP1_MOUSE]	5495.71	624.798	23641.8	1972	26405.5	445.079	0	140.977	11010.1	511.62	27506.7	2813.03	42641.1	679.304	0	197.495	0	0	1	0	1	0	0	0
Q99L13	1	1	37.42	0.247229	1.92369	PD-L1-KO	wild type	3-hydroxyisobutyrate dehydrogenase, mitochondrial OS=Mus musculus GN=Hibadh PE=2 SV=1 - [3HIDH_MOUSE]	4580.62	5696.26	3358.76	3888.64	9976.7	2371.2	12997.3	8366.01	9176.77	4664.41	3907.84	5547.09	16111	3619.06	12997.3	11719.9	0	0	0	0	1	0	0	1
Q4QQM4	1	1	25.04	0.247395	1.31455	wild type	PD-L1-KO	Tumor protein p53-inducible protein 11 OS=Mus musculus GN=Trp53i11 PE=1 SV=1 - [P5I11_MOUSE]	24327.1	39554.3	23601.2	17629	16445.1	18972.1	24871.9	19671.1	48736.8	32389.3	27459.4	25147.6	26556.5	28956.2	24871.9	27557.2	0	0	1	1	1	0	0	0
Q9CZU3	9	9	512.95	0.247658	1.13996	wild type	PD-L1-KO	Superkiller viralicidic activity 2-like 2 OS=Mus musculus GN=Skiv2l2 PE=2 SV=1 - [SK2L2_MOUSE]	533786	590215	472743	488523	375503	588422	464440	400882	1.06938e+06	483301	550025	696872	606384	898080	464440	561595	3	5	5	2	4	2	3	5
Q8R105	1	1	40.43	0.247677	2.12039	PD-L1-KO	wild type	Vacuolar protein sorting-associated protein 37C OS=Mus musculus GN=Vps37c PE=2 SV=1 - [VP37C_MOUSE]	1193.52	4804.42	6748.12	0	9440.69	4976.7	5987.05	6622.21	2391.09	3934.13	7851.27	0	15245.4	7595.7	5987.05	9277.04	0	0	0	0	1	0	0	0
Q9Z0L8	2	2	56.96	0.247873	1.4088	PD-L1-KO	wild type	Gamma-glutamyl hydrolase OS=Mus musculus GN=Ggh PE=1 SV=2 - [GGH_MOUSE]	40172.7	30397.1	154311	13839.6	127809	58781.3	59758.1	89960.9	80481.7	24890.8	179537	19742	206393	89715.1	59758.1	126026	0	0	1	0	1	0	1	1
Q99L48	1	1	29.41	0.247896	1.1705	wild type	PD-L1-KO	60S ribosomal export protein NMD3 OS=Mus musculus GN=Nmd3 PE=2 SV=1 - [NMD3_MOUSE]	8948.56	8696.38	8296.37	7317.72	973.31	21163.2	657.283	5620.5	17927.5	7121.08	9652.62	10438.6	1571.76	32300.4	657.283	7873.76	0	1	0	0	0	1	0	0
Q8BM39	1	1	67.93	0.248032	1.57247	wild type	PD-L1-KO	Pre-mRNA-splicing factor 18 OS=Mus musculus GN=Prpf18 PE=1 SV=1 - [PRP18_MOUSE]	29836.2	19986.4	21096.3	8621.19	14612.3	8387.08	18481.4	9102.19	59773.6	16366	24545	12298	23596.7	12800.8	18481.4	12751.3	1	0	1	0	1	0	1	0
Q6ZWV3	6	6	491.92	0.24819	1.82421	wild type	PD-L1-KO	60S ribosomal protein L10 OS=Mus musculus GN=Rpl10 PE=2 SV=3 - [RL10_MOUSE]	199450	103165	515431	309003	291490	127957	81943.1	116440	399577	84477.3	599692	440789	470715	195295	81943.1	163121	2	2	3	0	2	1	0	1
A2AR02	1	1	24.7	0.248242	1.59103	PD-L1-KO	wild type	Peptidyl-prolyl cis-trans isomerase G OS=Mus musculus GN=Ppig PE=1 SV=1 - [PPIG_MOUSE]	1535.89	2435.44	14961.1	20001.9	25754.5	7392.8	12482	16316.5	3076.98	1994.27	17406.9	28532.4	41589.9	11283.3	12482	22857.7	0	0	0	1	0	0	1	0
O54946	1	1	100.3	0.24889	1.65718	PD-L1-KO	wild type	DnaJ homolog subfamily B member 6 OS=Mus musculus GN=Dnajb6 PE=1 SV=4 - [DNJB6_MOUSE]	20320.2	24149	15397.6	23352.6	22831.7	44783.2	15443.7	54850.7	40709.4	19774.5	17914.7	33312.2	36869.9	68350.5	15443.7	76840.3	1	0	0	1	0	1	1	0
P84096	11	11	444.72	0.24937	1.24937	wild type	PD-L1-KO	Rho-related GTP-binding protein RhoG OS=Mus musculus GN=Rhog PE=2 SV=1 - [RHOG_MOUSE]	598468	658671	590829	623891	403495	261209	860164	453619	1.19897e+06	539356	687416	889972	651588	398671	860164	635474	3	4	5	3	5	2	4	4
Q9D0B6	3	3	142.1	0.24943	1.39001	wild type	PD-L1-KO	Protein PBDC1 OS=Mus musculus GN=Pbdc1 PE=2 SV=1 - [PBDC1_MOUSE]	31148.6	30571.2	55997.8	34074.2	33520.5	11544.5	42058.4	22078.2	62402.9	25033.4	65152	48606.4	54130.8	17619.8	42058.4	30929.4	0	1	1	1	1	0	2	1
Q9CYI4	1	1	117.17	0.249467	1.19113	wild type	PD-L1-KO	Putative RNA-binding protein Luc7-like 1 OS=Mus musculus GN=Luc7l PE=2 SV=2 - [LUC7L_MOUSE]	94944.5	109902	86144.9	101546	78240.9	121437	71929.6	57942.8	190211	89993.8	100228	144854	126348	185343	71929.6	81172.1	1	1	1	1	1	1	1	1
Q64282	1	1	43.33	0.249534	2.73597	wild type	PD-L1-KO	Interferon-induced protein with tetratricopeptide repeats 1 OS=Mus musculus GN=Ifit1 PE=1 SV=2 - [IFIT1_MOUSE]	1114.12	525.257	8308.17	79.2149	0	1772.04	0	1892.76	2232.01	430.109	9666.36	112.999	0	2704.57	0	2651.57	0	0	1	0	0	0	0	0
P01643	1	1	24.87	0.250353	1.54225	PD-L1-KO	wild type	Ig kappa chain V-V region MOPC 173 OS=Mus musculus PE=1 SV=1 - [KV5AA_MOUSE]	4793.31	18222.4	15233.7	57725	25619.6	62325.5	38280.7	21790.9	9602.88	14921.5	17724.1	82344	41372.1	95124.5	38280.7	30526.9	0	0	0	1	0	0	0	0
Q91V64	2	2	71.97	0.250935	1.1684	wild type	PD-L1-KO	Isochorismatase domain-containing protein 1 OS=Mus musculus GN=Isoc1 PE=2 SV=1 - [ISOC1_MOUSE]	80571.1	86968	92078.2	74552	85022.8	47945.5	81981.6	71057.1	161416	71214.2	107131	106348	137300	73177	81981.6	99543.9	0	0	1	1	1	0	2	0
P48722	2	2	127.89	0.251069	2.0143	wild type	PD-L1-KO	Heat shock 70 kDa protein 4L OS=Mus musculus GN=Hspa4l PE=1 SV=2 - [HS74L_MOUSE]	46917.6	41068	34951.1	8125.61	19113.9	11342.6	28061.1	6548.42	93994.3	33628.8	40664.8	11591.1	30866.2	17311.7	28061.1	9173.68	2	1	1	0	0	0	1	0
Q80U30	1	1	25.52	0.251156	1.33209	wild type	PD-L1-KO	Protein CLEC16A OS=Mus musculus GN=Clec16a PE=2 SV=2 - [CL16A_MOUSE]	36943.7	35273.4	29831.4	17806.4	22035.2	18153.8	32763	17023	74012.7	28883.8	34708.1	25400.6	35583.8	27707.3	32763	23847.5	0	0	0	0	0	0	1	0
P26043	29	11	1239.14	0.251365	1.28206	wild type	PD-L1-KO	Radixin OS=Mus musculus GN=Rdx PE=1 SV=3 - [RADI_MOUSE]	903463	795735	779496	640193	435627	310391	782700	903999	1.80999e+06	651592	906925	913227	703475	473736	782700	1.26641e+06	4	3	5	5	4	1	5	3
Q9JIH2	9	9	467.61	0.251774	1.16524	PD-L1-KO	wild type	Nuclear pore complex protein Nup50 OS=Mus musculus GN=Nup50 PE=1 SV=3 - [NUP50_MOUSE]	238884	276224	303364	233964	235035	364726	336258	290324	478579	226188	352957	333747	379548	556664	336258	406715	4	2	5	4	4	5	4	4
Q91WK2	6	6	249.35	0.251966	1.20893	wild type	PD-L1-KO	Eukaryotic translation initiation factor 3 subunit H OS=Mus musculus GN=Eif3h PE=1 SV=1 - [EIF3H_MOUSE]	473743	511900	458607	293145	366204	403458	349678	317799	949094	419172	533578	418168	591367	615779	349678	445205	5	3	4	3	2	3	3	2
Q9R1K9	2	2	133.51	0.252096	1.32148	wild type	PD-L1-KO	Centrin-2 OS=Mus musculus GN=Cetn2 PE=1 SV=1 - [CETN2_MOUSE]	385659	521926	515224	879546	400704	548536	430509	362510	772626	427382	599450	1.25466e+06	647081	837205	430509	507841	2	2	2	0	1	2	2	2
Q9WVQ5	1	1	52.83	0.252213	1.58124	PD-L1-KO	wild type	Methylthioribulose-1-phosphate dehydratase OS=Mus musculus GN=Apip PE=1 SV=1 - [MTNB_MOUSE]	1207.46	7197.55	7197.82	5020.5	10578.2	5956.53	11193.8	4882	2419.02	5893.75	8374.49	7161.68	17082.2	9091.18	11193.8	6839.19	0	0	1	0	1	0	1	0
Q6PIP5	2	1	86.4	0.252351	1.68367	wild type	PD-L1-KO	NudC domain-containing protein 1 OS=Mus musculus GN=Nudcd1 PE=2 SV=2 - [NUDC1_MOUSE]	35878.5	32166.8	46860.7	26069.6	37006	473.796	32795.4	13455.7	71878.6	26340	54521.3	37188	59759.5	723.132	32795.4	18850.1	0	0	0	0	1	0	0	0
P32233	3	3	171.05	0.252825	1.51899	wild type	PD-L1-KO	Developmentally-regulated GTP-binding protein 1 OS=Mus musculus GN=Drg1 PE=1 SV=1 - [DRG1_MOUSE]	157398	98697.3	191231	65435.9	157306	48328.8	67227.3	64707.1	315331	80818.8	222493	93343.5	254027	73762	67227.3	90648.1	1	1	1	0	1	1	1	1
Q9CQT1	1	1	84.27	0.253347	1.42222	wild type	PD-L1-KO	Methylthioribose-1-phosphate isomerase OS=Mus musculus GN=Mri1 PE=2 SV=1 - [MTNA_MOUSE]	18575.6	18968.2	16727.6	9094.49	11496.2	7646.22	21049.5	4362.4	37214.2	15532.2	19462.2	12973.2	18564.7	11670.1	21049.5	6111.28	1	1	1	0	0	0	0	0
P28656	17	11	629.96	0.253938	1.46838	wild type	PD-L1-KO	Nucleosome assembly protein 1-like 1 OS=Mus musculus GN=Nap1l1 PE=1 SV=2 - [NP1L1_MOUSE]	1.04954e+06	1.16807e+06	649378	1.90163e+06	547751	1.25346e+06	866887	579427	2.10263e+06	956479	755536	2.71265e+06	884540	1.9131e+06	866887	811719	6	3	6	4	5	3	2	1
Q9JJL8	4	4	204.13	0.254394	1.17838	PD-L1-KO	wild type	Serine--tRNA ligase, mitochondrial OS=Mus musculus GN=Sars2 PE=2 SV=2 - [SYSM_MOUSE]	61926	76380.9	108158	97772.4	117529	86624.3	107778	93711.3	124062	62544.9	125839	139471	189793	132211	107778	131280	1	1	3	1	3	2	2	3
Q9DCP9	1	1	26.84	0.254788	1.51929	wild type	PD-L1-KO	DAZ-associated protein 2 OS=Mus musculus GN=Dazap2 PE=1 SV=1 - [DAZP2_MOUSE]	47761.2	59430	45784.1	47852.9	44487.6	2339.57	62567.7	22790.9	95684.5	48664.5	53268.7	68261.5	71841.2	3570.78	62567.7	31927.7	0	0	0	0	1	0	0	0
Q9D8E6	10	10	416.74	0.255313	1.46808	wild type	PD-L1-KO	60S ribosomal protein L4 OS=Mus musculus GN=Rpl4 PE=1 SV=3 - [RL4_MOUSE]	667706	670354	861495	360947	798375	137091	499566	309087	1.33768e+06	548923	1.00233e+06	514886	1.28926e+06	209235	499566	432999	6	6	6	2	5	2	3	2
Q8BYK6	2	2	122.53	0.255458	1.23857	wild type	PD-L1-KO	YTH domain family protein 3 OS=Mus musculus GN=Ythdf3 PE=1 SV=2 - [YTHD3_MOUSE]	60487.5	60724.9	58478.6	34885.8	34755.8	41749.1	51319.9	45421.4	121180	49724.9	68038.4	49764.2	56125.8	63719.7	51319.9	63630.8	2	2	1	1	1	1	1	1
Q8C166	10	10	405.81	0.256462	1.20766	wild type	PD-L1-KO	Copine-1 OS=Mus musculus GN=Cpne1 PE=1 SV=1 - [CPNE1_MOUSE]	349097	329202	285982	310382	305882	192445	380457	176698	699379	269569	332733	442756	493955	293720	380457	247537	3	3	6	1	6	1	2	1
Q9DBY8	4	4	305.62	0.256702	1.14653	PD-L1-KO	wild type	Nuclear valosin-containing protein-like OS=Mus musculus GN=Nvl PE=1 SV=1 - [NVL_MOUSE]	189893	167059	221126	128887	221457	183742	212509	192849	380430	136798	257275	183856	357622	280436	212509	270162	2	3	2	3	3	1	3	3
Q9QZ23	1	1	51.36	0.257315	1.70817	PD-L1-KO	wild type	NFU1 iron-sulfur cluster scaffold homolog, mitochondrial OS=Mus musculus GN=Nfu1 PE=1 SV=2 - [NFU1_MOUSE]	1.97286	347.009	15592.9	17410.5	17671.7	1939.53	20011.1	17349.2	3.95241	284.15	18142	24835.9	28537.3	2960.21	20011.1	24304.5	0	0	1	0	1	0	0	0
Q91WM3	4	4	154.09	0.257436	1.2079	PD-L1-KO	wild type	U3 small nucleolar RNA-interacting protein 2 OS=Mus musculus GN=Rrp9 PE=1 SV=1 - [U3IP2_MOUSE]	83086.6	111252	66297.3	107895	97473.3	141113	115704	90860.1	166455	91099.7	77135.3	153910	157406	215375	115704	127286	0	3	2	1	3	3	2	1
Q80TQ2	3	3	134.85	0.257518	1.23584	wild type	PD-L1-KO	Ubiquitin carboxyl-terminal hydrolase CYLD OS=Mus musculus GN=Cyld PE=1 SV=2 - [CYLD_MOUSE]	25555.8	31051.9	30331.4	17120.2	21017.5	17293.3	23698.5	22192.1	51198.3	25427	35289.9	24421.7	33940.3	26394	23698.5	31088.9	1	0	1	0	1	1	0	0
Q64737	13	12	487.84	0.257656	1.37199	wild type	PD-L1-KO	Trifunctional purine biosynthetic protein adenosine-3 OS=Mus musculus GN=Gart PE=2 SV=3 - [PUR2_MOUSE]	375876	370395	547878	222763	353792	313627	262786	175428	753027	303300	637443	317769	571324	478674	262786	245756	4	2	5	2	4	3	3	2
Q6P1B1	4	4	212.6	0.257715	1.27606	wild type	PD-L1-KO	Xaa-Pro aminopeptidase 1 OS=Mus musculus GN=Xpnpep1 PE=2 SV=1 - [XPP1_MOUSE]	312625	295865	182783	233163	150666	287277	229098	135769	626310	242271	212663	332604	243304	438458	229098	190199	2	1	3	1	2	2	2	1
Q9DCT2	7	6	284.37	0.258037	2.10631	wild type	PD-L1-KO	NADH dehydrogenase [ubiquinone] iron-sulfur protein 3, mitochondrial OS=Mus musculus GN=Ndufs3 PE=1 SV=2 - [NDUS3_MOUSE]	55107.1	21206.3	108812	20903.1	10145.7	41172.1	25345	21151.6	110401	17364.9	126600	29818	16383.9	62839.1	25345	29631.3	1	1	2	0	0	1	0	1
Q9WTX8	3	3	187.72	0.258084	1.28397	PD-L1-KO	wild type	Mitotic spindle assembly checkpoint protein MAD1 OS=Mus musculus GN=Mad1l1 PE=2 SV=1 - [MD1L1_MOUSE]	58260.1	76935.9	44972.6	74498.9	102609	89391	83119	51866.4	116718	62999.4	52324.5	106272	165699	136433	83119	72659.6	2	1	0	1	1	2	1	0
Q8BFZ3	18	4	809.4	0.25849	4.34196	PD-L1-KO	wild type	Beta-actin-like protein 2 OS=Mus musculus GN=Actbl2 PE=1 SV=1 - [ACTBL_MOUSE]	110066	170380	119415	138485	116509	198861	170239	1.85187e+06	220505	139516	138937	197547	188145	303512	170239	2.59428e+06	0	0	0	0	0	0	1	6
Q6ZQA0	1	1	43.31	0.258622	1.62822	wild type	PD-L1-KO	Neurobeachin-like protein 2 OS=Mus musculus GN=Nbeal2 PE=2 SV=2 - [NBEL2_MOUSE]	44408.2	28383.4	35091.9	11676.2	22213.5	11724.6	23418.2	16073.4	88967	23241.9	40828.5	16655.9	35871.6	17894.7	23418.2	22517.1	1	0	0	1	0	0	1	0
Q03347	2	2	71.35	0.258904	1.49213	wild type	PD-L1-KO	Runt-related transcription factor 1 OS=Mus musculus GN=Runx1 PE=1 SV=1 - [RUNX1_MOUSE]	99117.6	53818.5	33585.3	74909.9	55287.7	43337.5	51739.5	24841.7	198571	44069.5	39075.7	106858	89281.8	66143.9	51739.5	34800.7	0	0	0	2	0	0	0	1
Q60974	3	3	121.49	0.258981	1.24094	wild type	PD-L1-KO	Nuclear receptor corepressor 1 OS=Mus musculus GN=Ncor1 PE=1 SV=1 - [NCOR1_MOUSE]	49007.6	60624.1	67011.8	66909.9	54953.5	40085.9	72678.3	28548.3	98181.4	49642.4	77966.6	95446.1	88742.1	61181.1	72678.3	39993.3	1	0	2	1	2	2	0	1
Q80US4	2	2	89.29	0.259022	1.38369	PD-L1-KO	wild type	Actin-related protein 5 OS=Mus musculus GN=Actr5 PE=2 SV=3 - [ARP5_MOUSE]	8850.93	12073.3	33798.5	31142.7	28016.7	19784	38326.5	32683.9	17731.9	9886.31	39323.7	44424.7	45243	30195.4	38326.5	45786.9	0	0	1	0	1	1	0	1
Q62376	13	13	332.79	0.259764	1.35037	PD-L1-KO	wild type	U1 small nuclear ribonucleoprotein 70 kDa OS=Mus musculus GN=Snrnp70 PE=1 SV=2 - [RU17_MOUSE]	120808	108378	237918	159512	319214	141806	182088	203056	242027	88746.2	276811	227541	515485	216432	182088	284461	1	1	6	2	8	1	4	4
Q5F2E7	1	1	39.78	0.260102	1.33242	wild type	PD-L1-KO	Nuclear fragile X mental retardation-interacting protein 2 OS=Mus musculus GN=Nufip2 PE=1 SV=1 - [NUFP2_MOUSE]	4359.33	6519.05	3459.6	6161.83	9889.69	3025.98	936.915	1532.87	8733.45	5338.16	4025.16	8789.78	15970.5	4618.41	936.915	2147.4	0	0	0	0	1	0	0	0
P47753	22	18	1071.34	0.260249	1.16194	wild type	PD-L1-KO	F-actin-capping protein subunit alpha-1 OS=Mus musculus GN=Capza1 PE=1 SV=4 - [CAZA1_MOUSE]	6.95786e+06	6.91138e+06	6.19371e+06	6.93121e+06	4.96522e+06	6.96157e+06	7.26167e+06	4.04341e+06	1.39393e+07	5.65942e+06	7.20623e+06	9.88728e+06	8.01813e+06	1.06251e+07	7.26167e+06	5.66441e+06	15	11	14	10	13	14	10	4
P63085	6	5	183.59	0.260383	1.23806	wild type	PD-L1-KO	Mitogen-activated protein kinase 1 OS=Mus musculus GN=Mapk1 PE=1 SV=3 - [MK01_MOUSE]	62836.8	49761.2	79449.5	78164	39848.1	76267.5	58849.3	43289.4	125887	40747.2	92437.5	111500	64349	116403	58849.3	60644	1	0	1	2	1	3	2	1
Q9Z0H1	1	1	57.41	0.260852	1.6628	wild type	PD-L1-KO	WD repeat-containing protein 46 OS=Mus musculus GN=Wdr46 PE=2 SV=1 - [WDR46_MOUSE]	70731	75686	53023.7	98188.8	496.272	102425	41119.7	34951.9	141702	61975.9	61691.8	140065	801.41	156327	41119.7	48964.2	0	0	0	1	0	1	1	1
Q8CDN6	23	23	963.57	0.261278	1.18474	PD-L1-KO	wild type	Thioredoxin-like protein 1 OS=Mus musculus GN=Txnl1 PE=1 SV=3 - [TXNL1_MOUSE]	1.21404e+06	1.80772e+06	1.39967e+06	1.18485e+06	1.51281e+06	2.13536e+06	1.63658e+06	1.35721e+06	2.43219e+06	1.48026e+06	1.62848e+06	1.69017e+06	2.44297e+06	3.2591e+06	1.63658e+06	1.90132e+06	6	6	7	7	10	14	13	10
P05202	16	16	691.81	0.261314	1.14832	PD-L1-KO	wild type	Aspartate aminotransferase, mitochondrial OS=Mus musculus GN=Got2 PE=1 SV=1 - [AATM_MOUSE]	2.66497e+06	3.94867e+06	2.69189e+06	2.87023e+06	3.29578e+06	4.2729e+06	3.2622e+06	3.15083e+06	5.33898e+06	3.23339e+06	3.13195e+06	4.09435e+06	5.32222e+06	6.52152e+06	3.2622e+06	4.414e+06	7	7	8	8	10	6	8	10
Q9QUI0	11	3	341.48	0.261324	1.33297	wild type	PD-L1-KO	Transforming protein RhoA OS=Mus musculus GN=Rhoa PE=1 SV=1 - [RHOA_MOUSE]	679679	405532	302590	436045	383915	385017	381140	218188	1.36166e+06	332072	352056	622012	619969	587633	381140	305659	1	2	2	0	1	1	1	0
P47740	6	6	239.13	0.261576	1.44718	wild type	PD-L1-KO	Fatty aldehyde dehydrogenase OS=Mus musculus GN=Aldh3a2 PE=2 SV=2 - [AL3A2_MOUSE]	315384	298592	229739	158568	218312	52117.4	221754	200393	631839	244503	267296	226195	352542	79544.4	221754	280730	1	1	3	2	5	0	2	1
Q8CCJ3	3	3	155.84	0.262068	1.50701	PD-L1-KO	wild type	E3 UFM1-protein ligase 1 OS=Mus musculus GN=Ufl1 PE=1 SV=2 - [UFL1_MOUSE]	31738.6	25073.7	22336.8	2889.41	22844.2	39468.6	31164.6	30155.1	63584.9	20531.8	25988.3	4121.7	36890.1	60239.1	31164.6	42244.3	0	0	1	0	1	0	1	0
Q9CQ62	6	6	281.19	0.262566	1.16678	wild type	PD-L1-KO	2,4-dienoyl-CoA reductase, mitochondrial OS=Mus musculus GN=Decr1 PE=1 SV=1 - [DECR_MOUSE]	515203	618263	468193	574105	560656	423820	549094	331191	1.03215e+06	506268	544732	818954	905379	646857	549094	463965	2	2	3	2	3	2	3	3
Q8CIE6	18	18	953.7	0.263067	1.23221	wild type	PD-L1-KO	Coatomer subunit alpha OS=Mus musculus GN=Copa PE=1 SV=2 - [COPA_MOUSE]	1.18421e+06	849461	999190	683856	910323	919913	581202	604869	2.37244e+06	695585	1.16253e+06	975512	1.47004e+06	1.40402e+06	581202	847361	5	4	8	2	7	8	6	5
O55022	6	5	180.38	0.263143	1.25092	PD-L1-KO	wild type	Membrane-associated progesterone receptor component 1 OS=Mus musculus GN=Pgrmc1 PE=1 SV=4 - [PGRC1_MOUSE]	94997.1	82665.9	131471	107137	148769	88855.6	116690	166407	190316	67691.5	152963	152830	240241	135616	116690	233120	1	2	2	2	3	1	1	1
Q80XU3	3	3	146.51	0.263516	1.69449	PD-L1-KO	wild type	Nuclear ubiquitous casein and cyclin-dependent kinase substrate 1 OS=Mus musculus GN=Nucks1 PE=1 SV=1 - [NUCKS_MOUSE]	143708	238576	87249.2	203735	513964	199988	302243	124654	287903	195359	101512	290625	829978	305232	302243	174628	4	2	2	3	0	1	5	2
Q689Z5	2	2	72.66	0.263706	1.61954	wild type	PD-L1-KO	Protein strawberry notch homolog 1 OS=Mus musculus GN=Sbno1 PE=1 SV=2 - [SBNO1_MOUSE]	32805.9	39110.8	9937.91	38821.5	2658.94	32327	35938.1	3588.69	65723	32026.1	11562.5	55378.4	4293.8	49339.2	35938.1	5027.4	0	1	0	1	0	0	1	0
Q9DCX2	18	18	747.36	0.264348	1.17156	wild type	PD-L1-KO	ATP synthase subunit d, mitochondrial OS=Mus musculus GN=Atp5h PE=1 SV=3 - [ATP5H_MOUSE]	2.97855e+06	2.95205e+06	2.78361e+06	2.82019e+06	3.26835e+06	1.73614e+06	2.94335e+06	1.89751e+06	5.96721e+06	2.4173e+06	3.23866e+06	4.02296e+06	5.27792e+06	2.6498e+06	2.94335e+06	2.65822e+06	7	3	9	9	15	4	9	7
P12970	10	10	359.84	0.264572	1.15465	wild type	PD-L1-KO	60S ribosomal protein L7a OS=Mus musculus GN=Rpl7a PE=2 SV=2 - [RL7A_MOUSE]	1.01046e+06	922540	1.15655e+06	716307	878608	856804	797976	762723	2.02435e+06	755427	1.34562e+06	1.0218e+06	1.41883e+06	1.3077e+06	797976	1.0685e+06	5	3	8	5	8	5	6	4
P61161	18	16	1072.43	0.265056	1.23133	wild type	PD-L1-KO	Actin-related protein 2 OS=Mus musculus GN=Actr2 PE=1 SV=1 - [ARP2_MOUSE]	4.89542e+06	5.39751e+06	3.99156e+06	6.23624e+06	3.52682e+06	6.11763e+06	4.30039e+06	2.72065e+06	9.80746e+06	4.41978e+06	4.64408e+06	8.89592e+06	5.69532e+06	9.33705e+06	4.30039e+06	3.81136e+06	7	10	11	11	11	6	13	9
Q9CRA8	1	1	91.79	0.26583	1.7139	PD-L1-KO	wild type	Exosome complex component RRP46 OS=Mus musculus GN=Exosc5 PE=1 SV=1 - [EXOS5_MOUSE]	23.866	748.565	14802	36.3291	17691.7	2201.79	219.448	6642.36	47.813	612.967	17221.8	51.823	28569.5	3360.49	219.448	9305.28	0	0	1	0	1	0	0	1
Q8BTM8	113	113	5710.36	0.265855	1.21639	wild type	PD-L1-KO	Filamin-A OS=Mus musculus GN=Flna PE=1 SV=5 - [FLNA_MOUSE]	1.56858e+07	1.29422e+07	1.5239e+07	9.03111e+06	1.08772e+07	1.2413e+07	1.15005e+07	8.69704e+06	3.14249e+07	1.05978e+07	1.77302e+07	1.28828e+07	1.75652e+07	1.89454e+07	1.15005e+07	1.21837e+07	65	39	73	47	62	40	54	37
O08585	6	6	296.59	0.266139	1.13771	PD-L1-KO	wild type	Clathrin light chain A OS=Mus musculus GN=Clta PE=1 SV=2 - [CLCA_MOUSE]	169690	214664	186509	199962	185357	193522	269712	228380	339955	175779	216999	285243	299326	295364	269712	319938	3	3	2	4	1	5	5	2
Q810B6	1	1	75.76	0.26668	1.88797	wild type	PD-L1-KO	Ankyrin repeat and FYVE domain-containing protein 1 OS=Mus musculus GN=Ankfy1 PE=2 SV=2 - [ANFY1_MOUSE]	41299.4	35062	25800.6	2994.05	6523.91	45678.3	1271.98	2223.92	82738.9	28710.7	30018.4	4270.97	10535.2	69716.6	1271.98	3115.48	1	1	0	0	0	1	0	0
Q9WU28	1	1	30.26	0.266797	1.66569	wild type	PD-L1-KO	Prefoldin subunit 5 OS=Mus musculus GN=Pfdn5 PE=1 SV=1 - [PFD5_MOUSE]	59842.1	38488.3	54732.2	11912.2	36629	2891.86	55008.6	4513.43	119887	31516.4	63679.5	16992.6	59150.6	4413.71	55008.6	6322.86	0	0	0	0	1	0	0	0
P51863	2	2	55.68	0.267904	1.27909	wild type	PD-L1-KO	V-type proton ATPase subunit d 1 OS=Mus musculus GN=Atp6v0d1 PE=1 SV=2 - [VA0D1_MOUSE]	65347.7	55456.4	54184.7	39315.5	42049.7	49251.1	54857.7	21386.3	130917	45410.8	63042.6	56083	67904.4	75169.7	54857.7	29960.1	0	0	2	1	0	0	0	0
O70194	12	11	621.16	0.268195	1.40548	wild type	PD-L1-KO	Eukaryotic translation initiation factor 3 subunit D OS=Mus musculus GN=Eif3d PE=1 SV=2 - [EIF3D_MOUSE]	825799	640361	329785	563447	308888	688892	449391	231538	1.6544e+06	524363	383697	803750	498810	1.05142e+06	449391	324362	5	4	4	5	3	4	3	1
Q61166	9	9	537.59	0.268445	1.27041	wild type	PD-L1-KO	Microtubule-associated protein RP/EB family member 1 OS=Mus musculus GN=Mapre1 PE=1 SV=3 - [MARE1_MOUSE]	2.47641e+06	2.09753e+06	1.34275e+06	2.07534e+06	1.41339e+06	2.30568e+06	1.53657e+06	1.03525e+06	4.96121e+06	1.71757e+06	1.56225e+06	2.96044e+06	2.28243e+06	3.51905e+06	1.53657e+06	1.45029e+06	8	6	6	7	7	8	7	6
Q9JM76	14	14	705.52	0.268976	1.34415	wild type	PD-L1-KO	Actin-related protein 2/3 complex subunit 3 OS=Mus musculus GN=Arpc3 PE=1 SV=3 - [ARPC3_MOUSE]	2.15101e+06	1.54993e+06	2.01301e+06	1.06816e+06	1.4272e+06	657439	1.67368e+06	1.28733e+06	4.30932e+06	1.26917e+06	2.34209e+06	1.52372e+06	2.30472e+06	1.00342e+06	1.67368e+06	1.80341e+06	10	8	9	7	11	3	10	5
Q99JY9	31	31	1384.97	0.268976	1.14432	wild type	PD-L1-KO	Actin-related protein 3 OS=Mus musculus GN=Actr3 PE=1 SV=3 - [ARP3_MOUSE]	1.22374e+07	1.15555e+07	9.5986e+06	9.38232e+06	9.1448e+06	1.04734e+07	1.06881e+07	7.07315e+06	2.45163e+07	9.4623e+06	1.11677e+07	1.33838e+07	1.47676e+07	1.59851e+07	1.06881e+07	9.90877e+06	27	22	20	14	17	23	19	16
P26041	55	37	3097.3	0.269068	1.25171	wild type	PD-L1-KO	Moesin OS=Mus musculus GN=Msn PE=1 SV=3 - [MOES_MOUSE]	1.1038e+07	1.12783e+07	8.07751e+06	9.19438e+06	1.00262e+07	8.44781e+06	9.12886e+06	4.02435e+06	2.21134e+07	9.23531e+06	9.39798e+06	1.31157e+07	1.61909e+07	1.28935e+07	9.12886e+06	5.63772e+06	34	29	27	27	21	25	27	17
Q9ERD8	1	1	55.41	0.269205	1.18191	wild type	PD-L1-KO	Gamma-parvin OS=Mus musculus GN=Parvg PE=2 SV=2 - [PARVG_MOUSE]	107868	143736	98094.3	130133	84713.1	136644	102317	82306.3	216102	117699	114130	185633	136800	208553	102317	115303	1	1	1	1	1	1	1	1
O70456	5	1	210.85	0.270374	2.0934	PD-L1-KO	wild type	14-3-3 protein sigma OS=Mus musculus GN=Sfn PE=1 SV=2 - [1433S_MOUSE]	8215.45	7007.3	14077.1	2336.58	8803.94	38510.4	12677.8	6235.77	16458.8	5737.96	16378.4	3333.1	14217.1	58776.5	12677.8	8735.69	0	0	1	0	1	0	0	0
Q8BIJ6	1	1	80	0.270449	2.46661	PD-L1-KO	wild type	Isoleucine--tRNA ligase, mitochondrial OS=Mus musculus GN=Iars2 PE=2 SV=1 - [SYIM_MOUSE]	1303.77	232.384	16789.7	1271.83	25833.7	898.77	4622.34	16985.1	2611.96	190.289	19534.4	1814.24	41717.7	1371.75	4622.34	23794.5	0	0	0	1	1	0	0	0
Q8BZX4	1	1	25.48	0.270634	1.53421	wild type	PD-L1-KO	Splicing regulatory glutamine/lysine-rich protein 1 OS=Mus musculus GN=Srek1 PE=2 SV=1 - [SREK1_MOUSE]	4845.39	2059.93	6312.58	3360.28	1866.38	1090.89	4423.11	3425.31	9707.21	1686.79	7344.54	4793.4	3013.94	1664.97	4423.11	4798.52	0	0	0	0	0	0	0	0
Q80TP3	1	1	22.42	0.270716	1.47935	wild type	PD-L1-KO	E3 ubiquitin-protein ligase UBR5 OS=Mus musculus GN=Ubr5 PE=1 SV=2 - [UBR5_MOUSE]	21774.9	13439.1	17889.9	21186.7	20276.3	1771.14	15062.8	13107.9	43623.7	11004.6	20814.5	30222.5	32743.4	2703.21	15062.8	18362.9	0	0	1	0	0	0	0	0
P68373	24	2	1296.65	0.270772	1.68615	wild type	PD-L1-KO	Tubulin alpha-1C chain OS=Mus musculus GN=Tuba1c PE=1 SV=1 - [TBA1C_MOUSE]	292535	1.06096e+06	1.15088e+06	858105	880441	279410	656291	178035	586062	868770	1.33902e+06	1.22408e+06	1.42179e+06	426450	656291	249409	0	3	1	3	1	0	2	0
Q3TTA7	7	7	218.9	0.271317	1.33453	wild type	PD-L1-KO	E3 ubiquitin-protein ligase CBL-B OS=Mus musculus GN=Cblb PE=1 SV=3 - [CBLB_MOUSE]	3.47865e+06	2.97822e+06	2.06105e+06	1.74517e+06	1.27564e+06	2.17477e+06	2.94315e+06	1.29685e+06	6.96909e+06	2.43873e+06	2.39798e+06	2.48947e+06	2.05997e+06	3.31925e+06	2.94315e+06	1.81676e+06	0	0	4	2	1	1	0	1
Q9D720	1	1	26.63	0.271475	3.0131	PD-L1-KO	wild type	Non-structural maintenance of chromosomes element 1 homolog OS=Mus musculus GN=Nsmce1 PE=2 SV=1 - [NSE1_MOUSE]	1058.42	312.453	1330.78	5075.31	7561.22	6105.19	438.969	9327.37	2120.42	255.854	1548.33	7239.86	12210.3	9318.07	438.969	13066.7	0	0	0	0	0	0	0	0
Q8C0L0	2	2	72.98	0.271663	1.28396	PD-L1-KO	wild type	Thioredoxin-related transmembrane protein 4 OS=Mus musculus GN=Tmx4 PE=1 SV=2 - [TMX4_MOUSE]	2171.04	3853.35	24730	45974.1	33785.7	22058.4	21529.8	21142.2	4349.44	3155.33	28772.8	65581.5	54559.2	33666.7	21529.8	29618.1	0	0	0	1	2	0	1	0
Q02242	5	5	312.47	0.271796	1.46326	PD-L1-KO	wild type	Programmed cell death protein 1 OS=Mus musculus GN=Pdcd1 PE=1 SV=1 - [PDCD1_MOUSE]	25813.9	24213.5	61963.7	94233.4	61704.6	48535.7	64118.5	127400	51715.3	19827.3	72093.2	134423	99644.1	74077.7	64118.5	178475	1	0	3	2	2	2	2	2
Q6PGH2	5	5	130.73	0.272375	1.69318	PD-L1-KO	wild type	Hematological and neurological expressed 1-like protein OS=Mus musculus GN=Hn1l PE=2 SV=1 - [HN1L_MOUSE]	11060.8	7279.53	47706.3	41386.8	70591.3	15942.1	41424	53946.2	22159.1	5960.88	55505.1	59037.7	113995	24331.6	41424	75573.2	0	0	1	2	3	0	0	0
P17183	15	1	1027.97	0.27357	3.18452	PD-L1-KO	wild type	Gamma-enolase OS=Mus musculus GN=Eno2 PE=1 SV=2 - [ENOG_MOUSE]	4666.57	8439.92	1109.72	1465.56	33510	10788.9	3476.42	2163.63	9348.97	6911.08	1291.13	2090.6	54113.8	16466.6	3476.42	3031.02	0	0	0	0	1	0	0	0
Q61550	5	5	335.4	0.273602	1.25984	wild type	PD-L1-KO	Double-strand-break repair protein rad21 homolog OS=Mus musculus GN=Rad21 PE=1 SV=3 - [RAD21_MOUSE]	259512	197416	181160	144188	145368	103486	239139	132940	519905	161655	210776	205683	234749	157946	239139	186235	4	2	3	1	3	0	2	3
Q8C7Q4	4	4	180.62	0.274059	1.27887	PD-L1-KO	wild type	RNA-binding protein 4 OS=Mus musculus GN=Rbm4 PE=1 SV=1 - [RBM4_MOUSE]	25068.7	42627.7	73721.6	81989.7	85226.2	60025.3	72004.1	68453.4	50222.5	34905.9	85773.3	116957	137628	91613.8	72004.1	95896.3	0	1	1	2	3	0	1	1
Q8BHK6	1	1	31.77	0.27423	4.08326	wild type	PD-L1-KO	SLAM family member 7 OS=Mus musculus GN=Slamf7 PE=2 SV=2 - [SLAF7_MOUSE]	39622.4	3349.2	2221.49	7629.79	4044.45	2021.54	3169.92	3700.54	79379.2	2742.51	2584.65	10883.8	6531.22	3085.38	3169.92	5184.09	0	0	0	0	1	0	0	0
Q9D2M8	6	2	382.01	0.27424	1.12621	wild type	PD-L1-KO	Ubiquitin-conjugating enzyme E2 variant 2 OS=Mus musculus GN=Ube2v2 PE=2 SV=4 - [UB2V2_MOUSE]	59504.2	75643.7	55269.9	69617.7	66203	53175.4	61949.5	49566.2	119210	61941.2	64305.2	99308.8	106908	81159.2	61949.5	69437.3	0	0	2	2	2	2	2	1
P13379	9	9	494.09	0.27436	1.19528	PD-L1-KO	wild type	T-cell surface glycoprotein CD5 OS=Mus musculus GN=Cd5 PE=1 SV=1 - [CD5_MOUSE]	623232	668795	774442	856984	612589	1.03607e+06	861707	983977	1.24858e+06	547647	901044	1.22248e+06	989244	1.5813e+06	861707	1.37845e+06	7	7	6	6	6	8	6	2
P17182	61	39	4437.23	0.274487	1.21973	wild type	PD-L1-KO	Alpha-enolase OS=Mus musculus GN=Eno1 PE=1 SV=3 - [ENOA_MOUSE]	2.59729e+07	3.01605e+07	2.71574e+07	2.67601e+07	1.78708e+07	3.63142e+07	2.35028e+07	1.25377e+07	5.2034e+07	2.46971e+07	3.15969e+07	3.81729e+07	2.88588e+07	5.54246e+07	2.35028e+07	1.7564e+07	38	33	33	16	22	31	23	15
Q3TW96	2	2	115.65	0.275108	1.27236	wild type	PD-L1-KO	UDP-N-acetylhexosamine pyrophosphorylase-like protein 1 OS=Mus musculus GN=Uap1l1 PE=2 SV=1 - [UAP1L_MOUSE]	62493.5	73725.5	75326.1	104013	71471.5	93556.7	48783.7	34196.9	125199	60370.5	87640.1	148373	115416	142791	48783.7	47906.5	0	1	2	1	1	0	1	0
Q9Z0U1	2	2	82.22	0.275474	1.22223	wild type	PD-L1-KO	Tight junction protein ZO-2 OS=Mus musculus GN=Tjp2 PE=1 SV=2 - [ZO2_MOUSE]	73005.6	80234.5	89804.5	63796.7	74725	90096	46886.8	39343.1	146259	65700.5	104485	91005.1	120670	137509	46886.8	55115.7	1	1	0	1	0	1	1	0
P50427	1	1	46.68	0.276078	1.36958	wild type	PD-L1-KO	Steryl-sulfatase OS=Mus musculus GN=Sts PE=2 SV=1 - [STS_MOUSE]	1700.27	6159.63	6517.24	11859.8	229.985	10946.8	7980.15	0	3406.31	5043.84	7582.65	16917.9	371.393	16707.6	7980.15	0	0	0	0	1	0	0	0	0
Q8BFY6	2	2	132.18	0.276352	1.42843	wild type	PD-L1-KO	Peflin OS=Mus musculus GN=Pef1 PE=2 SV=1 - [PEF1_MOUSE]	25597.4	33206.1	35413	39887	35012.7	23708.2	30963.6	4197.34	51281.6	27191	41202.2	56898.3	56540.5	36184.6	30963.6	5880.05	0	1	1	1	1	0	1	0
P62627	2	2	115.84	0.27653	1.31723	wild type	PD-L1-KO	Dynein light chain roadblock-type 1 OS=Mus musculus GN=Dynlrb1 PE=1 SV=3 - [DLRB1_MOUSE]	266169	332556	209184	197112	151733	83208	331949	196089	533240	272315	243381	281178	245028	126997	331949	274701	1	2	2	0	2	1	2	2
P23475	1	1	69.02	0.276588	1.14664	wild type	PD-L1-KO	X-ray repair cross-complementing protein 6 OS=Mus musculus GN=Xrcc6 PE=1 SV=5 - [XRCC6_MOUSE]	32187.6	35533.2	27054.1	31516.9	30761.1	20299.5	33737.8	25342.2	64484.4	29096.5	31476.8	44958.5	49674.9	30982.1	33737.8	35501.9	0	1	1	1	1	1	1	1
Q8CBY8	2	2	82.23	0.276634	1.37968	wild type	PD-L1-KO	Dynactin subunit 4 OS=Mus musculus GN=Dctn4 PE=1 SV=1 - [DCTN4_MOUSE]	36912	47837	45904.3	35953.7	25325.2	52687.6	36524.9	6220.17	73949.2	39171.6	53408.6	51287.4	40896.6	80414.6	36524.9	8713.84	0	1	2	0	1	0	1	0
Q8R1B4	9	9	477.73	0.276819	1.28313	wild type	PD-L1-KO	Eukaryotic translation initiation factor 3 subunit C OS=Mus musculus GN=Eif3c PE=1 SV=1 - [EIF3C_MOUSE]	313421	219997	267842	160094	198455	240453	192689	117627	627905	180146	311628	228372	320477	366992	192689	164783	4	2	5	1	5	4	1	2
Q8R502	6	6	219.18	0.276851	1.38713	wild type	PD-L1-KO	Leucine-rich repeat-containing protein 8C OS=Mus musculus GN=Lrrc8c PE=1 SV=1 - [LRC8C_MOUSE]	172903	130529	201050	88099.8	128859	51324.2	135294	111721	346392	106884	233916	125673	208089	78333.8	135294	156510	2	1	2	0	1	0	0	1
Q61687	2	1	83.31	0.276897	1.53617	wild type	PD-L1-KO	Transcriptional regulator ATRX OS=Mus musculus GN=Atrx PE=1 SV=3 - [ATRX_MOUSE]	26274.5	13984.3	13300.7	15167.2	21574.1	11153.1	11069.3	942.611	52638.1	11451.1	15475	21635.8	34839.2	17022.4	11069.3	1320.5	1	0	0	1	1	0	1	0
Q03963	1	1	28.13	0.277114	3.39029	wild type	PD-L1-KO	Interferon-induced, double-stranded RNA-activated protein kinase OS=Mus musculus GN=Eif2ak2 PE=1 SV=2 - [E2AK2_MOUSE]	22909.1	29757	727.688	41122.5	958.761	0	14547.5	12372.3	45895.9	24366.7	846.647	58660.7	1548.26	0	14547.5	17332.4	0	0	0	1	0	0	0	0
Q921F2	17	17	884.19	0.277422	1.24566	wild type	PD-L1-KO	TAR DNA-binding protein 43 OS=Mus musculus GN=Tardbp PE=1 SV=1 - [TADBP_MOUSE]	5.20232e+06	5.04697e+06	5.22984e+06	4.63624e+06	4.63574e+06	5.44599e+06	4.25475e+06	1.81184e+06	1.04223e+07	4.13274e+06	6.08479e+06	6.61353e+06	7.48607e+06	8.31196e+06	4.25475e+06	2.53821e+06	16	13	10	9	12	8	12	6
Q6PGB6	4	4	217.02	0.27783	1.45558	PD-L1-KO	wild type	N-alpha-acetyltransferase 50 OS=Mus musculus GN=Naa50 PE=1 SV=1 - [NAA50_MOUSE]	17263.3	25335.2	56604.7	49529.5	41369.1	42746.5	39160.8	93216	34585.1	20745.9	65858.2	70653.2	66805.3	65242	39160.8	130586	0	0	3	0	1	0	1	1
D3Z6Q9	11	11	699.59	0.278034	1.18226	wild type	PD-L1-KO	Bridging integrator 2 OS=Mus musculus GN=Bin2 PE=2 SV=1 - [BIN2_MOUSE]	1.36499e+06	1.15602e+06	1.14439e+06	1.03088e+06	1.1176e+06	666655	1.34963e+06	838402	2.73462e+06	946612	1.33147e+06	1.47054e+06	1.80477e+06	1.01748e+06	1.34963e+06	1.17452e+06	10	7	7	6	6	5	7	6
Q4QRL3	2	1	77.51	0.278112	1.47103	wild type	PD-L1-KO	Coiled-coil domain-containing protein 88B OS=Mus musculus GN=Ccdc88b PE=1 SV=2 - [CC88B_MOUSE]	16570.2	14013.5	11475.4	10951.1	8725.25	16636.3	9811.97	862.63	33196.7	11475.1	13351.3	15621.5	14090	25391.3	9811.97	1208.46	0	1	1	1	1	1	1	0
Q9CR29	1	1	54.83	0.278576	1.25027	PD-L1-KO	wild type	Coiled-coil domain-containing protein 43 OS=Mus musculus GN=Ccdc43 PE=1 SV=1 - [CCD43_MOUSE]	40494.4	45945.7	35113.6	76244.2	47484.4	79375.2	68887.3	51553.5	81126.2	37622.9	40853.8	108761	76680.6	121147	68887.3	72221.3	1	1	1	1	1	1	1	1
Q9CQR2	2	2	97.09	0.278844	1.38714	wild type	PD-L1-KO	40S ribosomal protein S21 OS=Mus musculus GN=Rps21 PE=2 SV=1 - [RS21_MOUSE]	390045	308477	264111	213234	240449	244923	299168	63151.9	781413	252598	307287	304176	388292	373814	299168	88469.5	2	2	2	2	3	2	2	1
Q8BYW1	1	1	50.46	0.27941	2.02957	wild type	PD-L1-KO	Rho GTPase-activating protein 25 OS=Mus musculus GN=Arhgap25 PE=1 SV=2 - [RHG25_MOUSE]	1205.88	2507.3	10047.9	6534.49	6124.03	593.024	495.102	2787.78	2415.84	2053.12	11690.5	9321.36	9889.44	905.104	495.102	3905.41	0	0	1	0	0	0	0	0
Q61510	1	1	36.15	0.279642	1.75654	wild type	PD-L1-KO	E3 ubiquitin/ISG15 ligase TRIM25 OS=Mus musculus GN=Trim25 PE=2 SV=2 - [TRI25_MOUSE]	15529.6	12231	24549.8	5803.56	17008.9	423.983	8775.54	6875.9	31111.9	10015.5	28563.1	8278.71	27467	647.106	8775.54	9632.45	1	0	0	0	0	0	0	0
Q9CQQ8	2	2	122.14	0.279826	1.31046	PD-L1-KO	wild type	U6 snRNA-associated Sm-like protein LSm7 OS=Mus musculus GN=Lsm7 PE=3 SV=1 - [LSM7_MOUSE]	77589.4	98514.6	73074.9	69659.2	75393.3	83916.5	92428.2	166085	155442	80669.2	85020.9	99367.9	121750	128078	92428.2	232669	2	2	1	1	2	1	2	0
P58242	1	1	58.54	0.28021	1.39507	PD-L1-KO	wild type	Acid sphingomyelinase-like phosphodiesterase 3b OS=Mus musculus GN=Smpdl3b PE=1 SV=1 - [ASM3B_MOUSE]	42873.5	39290.5	30888.9	26848.9	34912.4	29730.6	74976.4	55554	85892.5	32173.2	35938.4	38299.6	56378.6	45376.4	74976.4	77825.6	0	1	1	1	1	0	1	1
P37913	17	17	819.79	0.280445	1.37661	PD-L1-KO	wild type	DNA ligase 1 OS=Mus musculus GN=Lig1 PE=1 SV=2 - [DNLI1_MOUSE]	279836	280114	407690	289094	383653	723748	283030	339606	560621	229373	474337	412389	619546	1.10462e+06	283030	475753	5	5	6	7	7	8	6	4
Q9D8S9	2	2	123	0.281121	1.17541	PD-L1-KO	wild type	BolA-like protein 1 OS=Mus musculus GN=Bola1 PE=1 SV=1 - [BOLA1_MOUSE]	23816.4	40102.7	30233.2	40224.1	38909.1	40468	31947.6	46622.2	47713.6	32838.3	35175.6	57379.2	62832.7	61764.5	31947.6	65313	0	0	1	1	2	1	1	0
Q9CXW4	5	5	306.96	0.28122	1.13273	wild type	PD-L1-KO	60S ribosomal protein L11 OS=Mus musculus GN=Rpl11 PE=1 SV=4 - [RL11_MOUSE]	384083	376387	329103	325623	372642	241759	366592	268376	769469	308207	382903	464498	601764	368986	366592	375968	2	2	3	1	2	1	2	3
O54910	1	1	32.62	0.281411	1.16145	wild type	PD-L1-KO	NF-kappa-B inhibitor epsilon OS=Mus musculus GN=Nfkbie PE=2 SV=2 - [IKBE_MOUSE]	4923.1	4055.39	4381.26	5793.9	4723.74	5042.05	3442.14	3283.23	9862.9	3320.78	5097.49	8264.92	7628.17	7695.45	3442.14	4599.48	0	0	0	0	0	1	0	0
Q9DC61	2	2	79.55	0.281499	1.89211	wild type	PD-L1-KO	Mitochondrial-processing peptidase subunit alpha OS=Mus musculus GN=Pmpca PE=1 SV=1 - [MPPA_MOUSE]	3597.38	6463.45	20021.6	20076.5	10764.9	1177.39	13056.1	1511.17	7206.97	5292.63	23294.6	28638.8	17383.7	1796.99	13056.1	2116.99	0	0	0	1	1	0	0	0
O55142	3	3	104.92	0.281653	1.29656	wild type	PD-L1-KO	60S ribosomal protein L35a OS=Mus musculus GN=Rpl35a PE=2 SV=2 - [RL35A_MOUSE]	193252	152943	90313.7	121335	92700	148249	109297	80005	387159	125238	105078	173083	149697	226265	109297	112079	2	0	1	1	1	1	1	1
Q61823	3	3	123.79	0.281862	1.21645	wild type	PD-L1-KO	Programmed cell death protein 4 OS=Mus musculus GN=Pdcd4 PE=1 SV=1 - [PDCD4_MOUSE]	189479	140488	165899	180512	186025	96304.6	183935	89760.8	379600	115039	193019	257498	300404	146985	183935	125746	0	1	1	0	2	0	1	0
Q3UFY7	4	4	244.21	0.282079	1.17686	wild type	PD-L1-KO	7-methylguanosine phosphate-specific 5'-nucleotidase OS=Mus musculus GN=Nt5c3b PE=2 SV=3 - [5NT3B_MOUSE]	121224	115394	158257	152578	81691.6	150595	120631	112265	242860	94490.8	184128	217651	131920	229846	120631	157272	1	1	3	3	2	1	4	2
Q9CR57	4	4	249.48	0.282531	1.43175	wild type	PD-L1-KO	60S ribosomal protein L14 OS=Mus musculus GN=Rpl14 PE=2 SV=3 - [RL14_MOUSE]	353242	213937	459062	427178	293587	75286.3	377916	268345	707683	175183	534108	609363	474102	114906	377916	375925	1	1	4	0	3	0	2	3
O54824	18	18	1005.56	0.28257	1.21274	wild type	PD-L1-KO	Pro-interleukin-16 OS=Mus musculus GN=Il16 PE=1 SV=3 - [IL16_MOUSE]	1.70468e+06	1.90543e+06	1.30521e+06	1.43015e+06	1.37169e+06	1.54901e+06	1.53512e+06	776524	3.41514e+06	1.56027e+06	1.51858e+06	2.0401e+06	2.21509e+06	2.36418e+06	1.53512e+06	1.08783e+06	6	10	11	10	9	4	9	7
A2RSY6	2	2	174.14	0.282679	1.31361	wild type	PD-L1-KO	TRMT1-like protein OS=Mus musculus GN=Trmt1l PE=2 SV=1 - [TRM1L_MOUSE]	86707.4	62990.5	41839.7	71112.7	45323.6	80171.9	45410.8	29038.8	173709	51580.1	48679.5	101441	73191.3	122363	45410.8	40680.5	0	0	1	2	1	0	1	0
Q8C4B4	5	4	226.47	0.282831	1.24751	wild type	PD-L1-KO	Protein unc-119 homolog B OS=Mus musculus GN=Unc119b PE=2 SV=1 - [U119B_MOUSE]	132301	125005	94443.4	89821	73431.5	146380	82451.9	51697.4	265050	102361	109883	128129	118581	223413	82451.9	72422.8	1	1	3	2	2	1	2	2
Q8BH43	2	2	131.37	0.282877	1.18918	wild type	PD-L1-KO	Wiskott-Aldrich syndrome protein family member 2 OS=Mus musculus GN=Wasf2 PE=1 SV=1 - [WASF2_MOUSE]	165024	188191	136965	227626	131496	155513	191973	124633	330609	154101	159356	324706	212347	237352	191973	174599	1	1	2	0	2	1	1	0
Q8BHS3	6	5	268.43	0.282942	1.27767	wild type	PD-L1-KO	Pre-mRNA-splicing factor RBM22 OS=Mus musculus GN=Rbm22 PE=2 SV=1 - [RBM22_MOUSE]	232373	264224	226881	192500	234537	165236	244202	72940.2	465535	216361	263970	274599	378745	252192	244202	102182	1	1	3	4	5	1	4	0
Q9QXV1	2	2	46.39	0.282964	1.36049	PD-L1-KO	wild type	Chromobox protein homolog 8 OS=Mus musculus GN=Cbx8 PE=1 SV=1 - [CBX8_MOUSE]	6863.38	31400.5	10999.9	47117.6	22553.9	28230	41955.4	38386.3	13750	25712.5	12798.2	67212.6	36421.4	43086	41955.4	53775.4	0	0	0	2	2	0	0	0
Q8K3G5	5	5	229.14	0.283893	2.63322	PD-L1-KO	wild type	Inactive serine/threonine-protein kinase VRK3 OS=Mus musculus GN=Vrk3 PE=1 SV=2 - [VRK3_MOUSE]	2280.57	7455.94	31509.2	87162.5	130737	8098.14	159954	39338.8	4568.88	6105.33	36660.1	124336	211121	12359.8	159954	55109.8	0	0	1	1	3	0	2	0
Q9R0X4	3	1	196.91	0.284654	5.55609	PD-L1-KO	wild type	Acyl-coenzyme A thioesterase 9, mitochondrial OS=Mus musculus GN=Acot9 PE=1 SV=1 - [ACOT9_MOUSE]	2287.81	0	0	0	11306.5	1347.34	57.4093	0	4583.38	0	0	0	18258.4	2056.38	57.4093	0	0	0	0	0	1	0	0	0
Q62448	4	4	191.11	0.285278	1.2569	wild type	PD-L1-KO	Eukaryotic translation initiation factor 4 gamma 2 OS=Mus musculus GN=Eif4g2 PE=1 SV=2 - [IF4G2_MOUSE]	85209.1	114478	135389	71335.2	99960.9	89620.7	75353.6	58408.9	170707	93740.9	157522	101759	161423	136784	75353.6	81824.9	1	1	3	0	3	1	1	1
O09159	6	6	296.87	0.285666	1.15429	wild type	PD-L1-KO	Lysosomal alpha-mannosidase OS=Mus musculus GN=Man2b1 PE=2 SV=4 - [MA2B1_MOUSE]	252235	329687	253557	310088	243991	221373	332882	194194	505325	269966	295008	442337	394011	337871	332882	272047	0	1	2	5	2	1	1	2
Q9CQ00	4	4	98.99	0.286317	1.22586	PD-L1-KO	wild type	Transmembrane protein C9orf123 homolog OS=Mus musculus PE=2 SV=1 - [CI123_MOUSE]	181219	219986	144965	106166	167318	268420	184556	179378	363054	180137	168663	151445	270195	409676	184556	251290	1	0	4	1	2	0	1	0
P08003	32	31	1282.74	0.286533	1.17093	wild type	PD-L1-KO	Protein disulfide-isomerase A4 OS=Mus musculus GN=Pdia4 PE=1 SV=3 - [PDIA4_MOUSE]	4.23687e+06	4.25432e+06	2.86805e+06	3.46841e+06	3.45211e+06	3.18984e+06	3.65904e+06	2.3621e+06	8.48811e+06	3.48367e+06	3.33691e+06	4.94764e+06	5.57467e+06	4.8685e+06	3.65904e+06	3.30907e+06	11	11	16	15	21	10	16	14
P97808	2	2	53.75	0.286645	1.35474	PD-L1-KO	wild type	FXYD domain-containing ion transport regulator 5 OS=Mus musculus GN=Fxyd5 PE=1 SV=3 - [FXYD5_MOUSE]	4089.13	11566.4	24971.1	27655.3	22606.3	24961.3	27437.7	17499.1	8192.12	9471.21	29053.3	39450	36506	38097.2	27437.7	24514.5	0	0	0	1	1	1	1	0
Q6PFR5	6	5	358.21	0.288507	1.40858	wild type	PD-L1-KO	Transformer-2 protein homolog alpha OS=Mus musculus GN=Tra2a PE=1 SV=1 - [TRA2A_MOUSE]	242013	295603	197740	339359	160355	246060	322785	33777.1	484847	242056	230065	484092	258950	375550	322785	47318.3	1	2	4	2	4	2	3	2
Q925I1	3	3	113.59	0.288674	1.29395	wild type	PD-L1-KO	ATPase family AAA domain-containing protein 3 OS=Mus musculus GN=Atad3 PE=1 SV=1 - [ATAD3_MOUSE]	19393	20913.7	17502.9	14261.8	30573.4	3081.48	15581.5	6462.23	38851.8	17125.3	20364.2	20344.3	49371.7	4703.12	15581.5	9052.94	0	0	1	0	1	0	1	1
P11835	30	29	1689.2	0.288782	1.15243	wild type	PD-L1-KO	Integrin beta-2 OS=Mus musculus GN=Itgb2 PE=1 SV=2 - [ITB2_MOUSE]	4.69385e+06	4.77545e+06	4.08086e+06	3.76085e+06	3.41479e+06	4.76667e+06	4.15591e+06	2.68399e+06	9.40362e+06	3.9104e+06	4.74798e+06	5.3648e+06	5.5144e+06	7.27515e+06	4.15591e+06	3.76001e+06	19	21	17	14	17	19	19	13
Q8BH69	4	4	286.64	0.289878	1.12879	wild type	PD-L1-KO	Selenide, water dikinase 1 OS=Mus musculus GN=Sephs1 PE=2 SV=1 - [SPS1_MOUSE]	231478	248039	294785	208593	220641	264121	199806	186186	463741	203108	342975	297555	356304	403115	199806	260828	1	2	3	1	2	1	2	2
Q91VM9	4	4	219.97	0.29022	1.34451	wild type	PD-L1-KO	Inorganic pyrophosphatase 2, mitochondrial OS=Mus musculus GN=Ppa2 PE=2 SV=1 - [IPYR2_MOUSE]	94502.3	118744	119636	125840	106109	97539.9	115734	21799.2	189325	97233.8	139194	179510	171351	148871	115734	30538.5	1	2	2	2	1	0	2	1
Q8CIM8	1	1	58.21	0.291253	1.1924	PD-L1-KO	wild type	Integrator complex subunit 4 OS=Mus musculus GN=Ints4 PE=2 SV=1 - [INT4_MOUSE]	44043.5	50943.8	70933.9	98481.1	90950.3	74386.8	81609.3	68326.1	88236.4	41715.6	82529.8	140482	146872	113533	81609.3	95718	1	1	0	1	0	1	0	0
P07901	55	34	2733.95	0.292367	1.16329	wild type	PD-L1-KO	Heat shock protein HSP 90-alpha OS=Mus musculus GN=Hsp90aa1 PE=1 SV=4 - [HS90A_MOUSE]	5.35957e+06	5.31322e+06	5.14372e+06	4.22991e+06	4.60227e+06	5.88344e+06	3.73914e+06	3.00761e+06	1.07373e+07	4.35076e+06	5.9846e+06	6.03391e+06	7.43201e+06	8.97962e+06	3.73914e+06	4.21336e+06	17	11	23	13	22	15	16	11
Q6P1F6	2	2	104.09	0.29303	1.18093	wild type	PD-L1-KO	Serine/threonine-protein phosphatase 2A 55 kDa regulatory subunit B alpha isoform OS=Mus musculus GN=Ppp2r2a PE=1 SV=1 - [2ABA_MOUSE]	235365	232100	221864	185531	192383	235139	201916	111383	471529	190056	258134	264658	310672	358882	201916	156036	1	0	2	1	2	0	0	1
Q8BMJ2	4	4	141.66	0.293124	1.36721	wild type	PD-L1-KO	Leucine--tRNA ligase, cytoplasmic OS=Mus musculus GN=Lars PE=2 SV=2 - [SYLC_MOUSE]	84479.5	191112	191416	144301	147100	61927	118721	119374	169245	156493	222708	205843	237546	94516.2	118721	167231	1	1	2	2	2	0	0	1
Q9ERA6	1	1	33.21	0.293723	1.40071	PD-L1-KO	wild type	Tuftelin-interacting protein 11 OS=Mus musculus GN=Tfip11 PE=1 SV=1 - [TFP11_MOUSE]	28844.5	32425.7	19256.6	20603	54252.3	39849.7	27759.5	19791.7	57786.8	26552	22404.6	29389.9	87609.8	60820.8	27759.5	27726.1	0	0	0	1	0	1	0	0
P29351	24	23	1085.41	0.294036	1.19922	wild type	PD-L1-KO	Tyrosine-protein phosphatase non-receptor type 6 OS=Mus musculus GN=Ptpn6 PE=1 SV=2 - [PTN6_MOUSE]	1.88547e+06	1.99196e+06	1.62642e+06	2.03911e+06	1.54386e+06	2.33976e+06	1.51293e+06	893359	3.77735e+06	1.63113e+06	1.8923e+06	2.90876e+06	2.49312e+06	3.57107e+06	1.51293e+06	1.25151e+06	5	6	14	7	11	5	9	7
Q8VE92	1	1	73.1	0.294177	1.33467	wild type	PD-L1-KO	RNA-binding protein 4B OS=Mus musculus GN=Rbm4b PE=1 SV=1 - [RBM4B_MOUSE]	9553.66	13244.8	6125.32	14372.7	3374.73	20168.8	7141.58	1754.71	19139.7	10845.5	7126.66	20502.5	5449.72	30782.7	7141.58	2458.18	1	0	0	0	0	1	0	0
Q9Z2D8	5	3	215.01	0.294201	1.33243	PD-L1-KO	wild type	Methyl-CpG-binding domain protein 3 OS=Mus musculus GN=Mbd3 PE=1 SV=1 - [MBD3_MOUSE]	16685.1	21539.3	34472.8	40208.6	51163.6	22872.5	41576.7	34826.6	33426.8	17637.6	40108.2	57357	82621.9	34909.2	41576.7	48788.6	0	0	0	1	1	0	0	1
Q9DB25	1	1	74.13	0.294654	1.17615	wild type	PD-L1-KO	Dolichyl-phosphate beta-glucosyltransferase OS=Mus musculus GN=Alg5 PE=2 SV=1 - [ALG5_MOUSE]	130441	155172	97730.5	113302	127230	111917	104349	78769.4	261324	127063	113707	161624	205458	170814	104349	110348	1	1	1	1	1	1	1	1
Q921I1	1	1	41.43	0.295936	1.38717	PD-L1-KO	wild type	Serotransferrin OS=Mus musculus GN=Tf PE=1 SV=1 - [TRFE_MOUSE]	1127.24	22691.6	16331.4	395.018	18439.4	14453.9	4131.26	19218.7	2258.31	18581.2	19001.1	563.487	29777	22060.3	4131.26	26923.5	0	0	0	0	0	0	0	0
Q9QYB1	1	1	39.9	0.296121	1.98028	PD-L1-KO	wild type	Chloride intracellular channel protein 4 OS=Mus musculus GN=Clic4 PE=1 SV=3 - [CLIC4_MOUSE]	42961	26718.4	1893.55	12953.6	55773.9	8363.98	52019.6	51228.2	86067.7	21878.5	2203.1	18478.2	90066.9	12765.6	52019.6	71765.6	1	0	0	0	2	0	0	2
P33610	1	1	89.34	0.296239	1.37284	wild type	PD-L1-KO	DNA primase large subunit OS=Mus musculus GN=Prim2 PE=1 SV=1 - [PRI2_MOUSE]	54588.3	42885.8	40055.1	43939.9	37769.5	47134.2	40933.9	6347.5	109362	35117.3	46603.1	62679.7	60992.4	71938.6	40933.9	8892.2	0	0	0	1	1	0	1	0
Q9QXK9	2	2	73.18	0.296291	1.87966	wild type	PD-L1-KO	SH2 domain-containing protein 2A OS=Mus musculus GN=Sh2d2a PE=1 SV=1 - [SH22A_MOUSE]	31133.9	20817.4	33194.7	6045.06	17163.6	14224.2	8453.97	8672.82	62373.3	17046.4	38621.3	8623.2	27716.8	21709.7	8453.97	12149.8	0	0	1	0	0	0	1	1
Q61655	7	7	233.84	0.296835	1.22017	wild type	PD-L1-KO	ATP-dependent RNA helicase DDX19A OS=Mus musculus GN=Ddx19a PE=2 SV=2 - [DD19A_MOUSE]	194738	211154	227300	317466	294254	190279	150053	144536	390137	172905	264458	452861	475179	290414	150053	202480	0	1	2	3	2	1	1	1
P84075	2	2	100.2	0.296911	1.16058	PD-L1-KO	wild type	Neuron-specific calcium-binding protein hippocalcin OS=Mus musculus GN=Hpca PE=1 SV=2 - [HPCA_MOUSE]	32491.3	38459.6	29813.2	34030.2	43840.5	31021.1	48324.6	33252.8	65092.8	31492.8	34686.9	48543.6	70796.2	47346	48324.6	46583.9	2	2	1	2	0	2	1	1
Q9D2G2	9	9	573.3	0.297308	1.31207	wild type	PD-L1-KO	Dihydrolipoyllysine-residue succinyltransferase component of 2-oxoglutarate dehydrogenase complex, mitochondrial OS=Mus musculus GN=Dlst PE=1 SV=1 - [ODO2_MOUSE]	1.2793e+06	1.49598e+06	873250	1.35034e+06	882510	966453	1.61012e+06	350816	2.56295e+06	1.22499e+06	1.016e+06	1.92625e+06	1.42513e+06	1.47505e+06	1.61012e+06	491458	7	6	7	6	5	4	8	2
Q64131	12	9	610.7	0.297484	1.19883	wild type	PD-L1-KO	Runt-related transcription factor 3 OS=Mus musculus GN=Runx3 PE=2 SV=3 - [RUNX3_MOUSE]	397878	525412	405290	578080	375368	523104	432011	259951	797106	430236	471545	824624	606166	798389	432011	364165	3	3	3	5	3	5	2	1
O09044	2	2	68.2	0.29766	1.33276	wild type	PD-L1-KO	Synaptosomal-associated protein 23 OS=Mus musculus GN=Snap23 PE=1 SV=1 - [SNP23_MOUSE]	41275.1	50372.5	24786.6	52408.6	18565.4	73367.8	8518.11	26235.5	82690.3	41247.8	28838.6	74760.1	29980.5	111978	8518.11	36753.2	0	0	1	1	1	1	0	0
Q9CQA6	1	1	54.77	0.298656	1.30851	PD-L1-KO	wild type	Coiled-coil-helix-coiled-coil-helix domain-containing protein 1 OS=Mus musculus GN=Chchd1 PE=2 SV=1 - [CHCH1_MOUSE]	10744.6	9594.24	25815.2	36924.2	21414.7	25368	38277.6	23648.5	21525.7	7856.29	30035.3	52671.9	34581.7	38718	38277.6	33129.2	0	0	0	1	1	1	1	1
Q60631	6	6	229.75	0.299153	1.08715	wild type	PD-L1-KO	Growth factor receptor-bound protein 2 OS=Mus musculus GN=Grb2 PE=1 SV=1 - [GRB2_MOUSE]	772546	968470	843363	801533	764886	722347	910275	716982	1.54771e+06	793037	981232	1.14338e+06	1.23518e+06	1.10248e+06	910275	1.00442e+06	4	3	2	3	3	3	3	1
Q99N69	3	3	226.45	0.299212	1.36746	wild type	PD-L1-KO	Leupaxin OS=Mus musculus GN=Lpxn PE=1 SV=2 - [LPXN_MOUSE]	148936	245699	215593	310225	261754	124555	233034	53766.9	298378	201192	250837	442532	422695	190102	233034	75322	2	2	2	1	2	1	2	0
Q05512	2	2	108.9	0.299455	1.14114	wild type	PD-L1-KO	Serine/threonine-protein kinase MARK2 OS=Mus musculus GN=Mark2 PE=1 SV=3 - [MARK2_MOUSE]	39509.1	46428.1	49927.8	34855.3	41358.9	32956.8	44149.4	31139.9	79152.2	38017.9	58089.7	49720.7	66788.8	50300.4	44149.4	43623.9	1	1	2	1	1	2	2	2
O08553	36	26	1917.61	0.299519	1.20546	wild type	PD-L1-KO	Dihydropyrimidinase-related protein 2 OS=Mus musculus GN=Dpysl2 PE=1 SV=2 - [DPYL2_MOUSE]	6.52976e+06	7.50281e+06	5.17211e+06	7.512e+06	4.66828e+06	7.7842e+06	6.1863e+06	3.52423e+06	1.30817e+07	6.14372e+06	6.01762e+06	1.07158e+07	7.53862e+06	1.18807e+07	6.1863e+06	4.93709e+06	23	17	24	18	21	16	17	12
Q6R891	2	2	107.36	0.300236	3.28689	PD-L1-KO	wild type	Neurabin-2 OS=Mus musculus GN=Ppp1r9b PE=1 SV=1 - [NEB2_MOUSE]	6579.78	4161.34	12796.4	7841.03	68181.6	17727.1	13937.1	3291.88	13181.9	3407.53	14888.3	11185.1	110104	27056	13937.1	4611.59	0	0	0	0	1	0	0	0
Q8VH51	15	15	769.6	0.300661	1.2031	wild type	PD-L1-KO	RNA-binding protein 39 OS=Mus musculus GN=Rbm39 PE=1 SV=2 - [RBM39_MOUSE]	1.72478e+06	1.93378e+06	1.32273e+06	2.03693e+06	1.60868e+06	1.56035e+06	1.75878e+06	905636	3.45541e+06	1.58349e+06	1.53896e+06	2.90566e+06	2.5978e+06	2.38149e+06	1.75878e+06	1.2687e+06	8	7	7	4	6	5	7	4
Q61941	2	2	118.73	0.300726	1.29481	wild type	PD-L1-KO	NAD(P) transhydrogenase, mitochondrial OS=Mus musculus GN=Nnt PE=1 SV=2 - [NNTM_MOUSE]	46341.9	70423.5	85940.6	86809.1	51512.7	30360.9	94039.9	47683.5	92841	57666.7	99989.8	123832	83185.7	46338.4	94039.9	66799.8	0	0	0	2	0	0	2	2
Q9JLV6	3	3	259.65	0.300729	1.21484	wild type	PD-L1-KO	Bifunctional polynucleotide phosphatase/kinase OS=Mus musculus GN=Pnkp PE=1 SV=2 - [PNKP_MOUSE]	169552	188727	170765	198944	140001	205774	179773	73698	339679	154540	198681	283790	226082	314064	179773	103243	3	2	1	2	2	2	2	2
Q99JI6	20	6	1144.16	0.300908	1.24008	wild type	PD-L1-KO	Ras-related protein Rap-1b OS=Mus musculus GN=Rap1b PE=2 SV=2 - [RAP1B_MOUSE]	1.35366e+06	1.17674e+06	845806	855743	868293	1.18331e+06	849312	511718	2.71191e+06	963579	984074	1.22071e+06	1.40217e+06	1.80602e+06	849312	716866	7	6	5	4	6	3	6	4
Q03958	3	3	119.23	0.300933	1.53228	PD-L1-KO	wild type	Prefoldin subunit 6 OS=Mus musculus GN=Pfdn6 PE=2 SV=1 - [PFD6_MOUSE]	47368.5	59678	6863.94	39866.9	35840.8	95306.3	62555.5	41927.9	94897.6	48867.7	7986.03	56869.6	57877.7	145462	62555.5	58736.7	2	0	0	1	1	1	1	0
Q9D404	3	3	139.23	0.300971	1.51983	wild type	PD-L1-KO	3-oxoacyl-[acyl-carrier-protein] synthase, mitochondrial OS=Mus musculus GN=Oxsm PE=2 SV=1 - [OXSM_MOUSE]	160369	477239	180339	212357	255874	158116	191125	72794.2	321283	390790	209820	302925	413201	241325	191125	101977	1	0	3	1	3	0	1	2
Q9CPW4	3	3	265.4	0.301687	1.18471	wild type	PD-L1-KO	Actin-related protein 2/3 complex subunit 5 OS=Mus musculus GN=Arpc5 PE=2 SV=3 - [ARPC5_MOUSE]	1.61481e+06	2.05107e+06	1.2285e+06	1.65447e+06	1.29064e+06	1.44668e+06	1.74971e+06	1.04076e+06	3.23509e+06	1.67953e+06	1.42933e+06	2.36009e+06	2.0842e+06	2.208e+06	1.74971e+06	1.458e+06	8	6	3	4	3	7	6	4
Q9Z1Q5	21	21	795.42	0.302749	1.27843	wild type	PD-L1-KO	Chloride intracellular channel protein 1 OS=Mus musculus GN=Clic1 PE=1 SV=3 - [CLIC1_MOUSE]	1.81824e+06	1.28986e+06	1.84706e+06	953533	1.5398e+06	885594	1.33387e+06	862549	3.64264e+06	1.05621e+06	2.149e+06	1.3602e+06	2.48656e+06	1.35164e+06	1.33387e+06	1.20834e+06	10	5	12	4	10	1	6	6
P51174	21	21	998.3	0.303062	1.2191	wild type	PD-L1-KO	Long-chain specific acyl-CoA dehydrogenase, mitochondrial OS=Mus musculus GN=Acadl PE=2 SV=2 - [ACADL_MOUSE]	3.39654e+06	3.92002e+06	2.76884e+06	2.18432e+06	2.74638e+06	1.79867e+06	3.07858e+06	2.44095e+06	6.80461e+06	3.20993e+06	3.22147e+06	3.11591e+06	4.43502e+06	2.74522e+06	3.07858e+06	3.41952e+06	12	11	11	8	13	5	11	11
A2AJT4	1	1	22.82	0.303126	1.27035	PD-L1-KO	wild type	Arginine/serine-rich protein PNISR OS=Mus musculus GN=Pnisr PE=1 SV=1 - [PNISR_MOUSE]	5522.7	8020.6	8203.08	8622.38	11643.6	10780.4	10442.8	5712.28	11064.1	6567.71	9544.08	12299.7	18802.7	16453.5	10442.8	8002.32	0	0	0	0	0	0	0	0
Q5DTM8	5	4	199.57	0.303148	1.15274	PD-L1-KO	wild type	E3 ubiquitin-protein ligase BRE1A OS=Mus musculus GN=Rnf20 PE=1 SV=2 - [BRE1A_MOUSE]	44551.6	60211.7	54193.5	71211.7	63957.4	60753.3	57057.8	83555.3	89254.4	49304.7	63052.8	101583	103282	92724.8	57057.8	117053	0	0	0	1	2	2	1	0
P70445	1	1	67.3	0.303344	1.27989	PD-L1-KO	wild type	Eukaryotic translation initiation factor 4E-binding protein 2 OS=Mus musculus GN=Eif4ebp2 PE=2 SV=1 - [4EBP2_MOUSE]	30010.4	27829.5	18058.4	48419.8	37147.2	55127.5	39225.9	27613.2	60122.7	22788.3	21010.5	69070.2	59987.5	84138.5	39225.9	38683.3	1	1	0	0	0	1	0	0
O35459	12	12	766.75	0.303392	1.23036	wild type	PD-L1-KO	Delta(3,5)-Delta(2,4)-dienoyl-CoA isomerase, mitochondrial OS=Mus musculus GN=Ech1 PE=2 SV=1 - [ECH1_MOUSE]	1.07944e+06	1.45406e+06	821728	1.12565e+06	625472	1.34744e+06	945613	723411	2.16255e+06	1.19067e+06	956060	1.60573e+06	1.01005e+06	2.05654e+06	945613	1.01343e+06	6	6	6	5	7	7	5	6
Q922J9	1	1	69.42	0.303487	1.17919	wild type	PD-L1-KO	Fatty acyl-CoA reductase 1 OS=Mus musculus GN=Far1 PE=1 SV=1 - [FACR1_MOUSE]	36701.6	50689	45701.2	40115.9	37573.6	52817.9	31643.6	24851.3	73527.6	41507	53172.3	57224.8	60676	80613.5	31643.6	34814.2	0	1	1	1	1	1	1	1
Q9CQT2	1	1	45.12	0.303774	1.24355	PD-L1-KO	wild type	RNA-binding protein 7 OS=Mus musculus GN=Rbm7 PE=2 SV=1 - [RBM7_MOUSE]	23903.3	27546.4	12528.8	22341.8	21339.6	36629.5	26255.9	23118.3	47887.6	22556.5	14577	31870.2	34460.5	55905.9	26255.9	32386.4	0	0	0	0	1	0	0	1
Q9QWL7	17	4	791.88	0.303819	3.17829	wild type	PD-L1-KO	Keratin, type I cytoskeletal 17 OS=Mus musculus GN=Krt17 PE=1 SV=3 - [K1C17_MOUSE]	219965	9269.44	173200	90848.2	6597.22	33812.7	30446.8	84347.1	440676	7590.33	201513	129594	10653.6	51606.7	30446.8	118162	2	0	2	2	0	1	2	1
Q91XU0	1	1	65.29	0.304159	1.57917	wild type	PD-L1-KO	ATPase WRNIP1 OS=Mus musculus GN=Wrnip1 PE=1 SV=2 - [WRIP1_MOUSE]	7000.17	2643.13	10274.3	7443.34	11583.6	1890.63	0	3851.93	14024.1	2164.34	11953.9	10617.8	18705.8	2885.58	0	5396.17	0	0	0	0	1	0	0	0
Q99020	18	16	836.88	0.305211	1.21018	wild type	PD-L1-KO	Heterogeneous nuclear ribonucleoprotein A/B OS=Mus musculus GN=Hnrnpab PE=1 SV=1 - [ROAA_MOUSE]	7.74967e+06	8.12738e+06	6.90848e+06	5.56523e+06	6.66918e+06	3.35429e+06	7.88448e+06	5.51894e+06	1.55256e+07	6.65515e+06	8.03785e+06	7.93873e+06	1.07698e+07	5.11949e+06	7.88448e+06	7.73148e+06	9	11	11	10	12	6	15	12
Q61768	10	10	419.41	0.30555	1.19943	wild type	PD-L1-KO	Kinesin-1 heavy chain OS=Mus musculus GN=Kif5b PE=1 SV=3 - [KINH_MOUSE]	331364	310014	350366	237694	229709	391168	166744	237395	663851	253856	407642	339067	370947	597021	166744	332567	4	3	6	4	3	2	4	2
Q9D6V8	1	1	26.82	0.305659	1.37409	PD-L1-KO	wild type	Polyadenylate-binding protein-interacting protein 2 OS=Mus musculus GN=Paip2 PE=2 SV=1 - [PAIP2_MOUSE]	12976.9	22552.6	1257.29	49116.1	21229.7	38552.7	35497.4	22758.5	25997.7	18467.3	1462.82	70063.5	34283	58841.2	35497.4	31882.4	0	0	0	0	1	0	0	1
Q9JHU4	12	12	539.42	0.305686	1.39893	wild type	PD-L1-KO	Cytoplasmic dynein 1 heavy chain 1 OS=Mus musculus GN=Dync1h1 PE=1 SV=2 - [DYHC1_MOUSE]	454092	237483	294776	158868	224311	134441	269685	190202	909724	194464	342965	226623	362231	205190	269685	266453	4	0	7	1	7	2	2	4
Q61210	36	36	1787.43	0.305727	1.12184	wild type	PD-L1-KO	Rho guanine nucleotide exchange factor 1 OS=Mus musculus GN=Arhgef1 PE=1 SV=2 - [ARHG1_MOUSE]	3.07072e+06	2.99149e+06	3.20343e+06	3.08874e+06	3.52889e+06	2.11112e+06	3.08186e+06	2.29073e+06	6.15186e+06	2.4496e+06	3.72712e+06	4.40604e+06	5.69866e+06	3.22211e+06	3.08186e+06	3.20909e+06	19	14	17	8	17	12	15	12
Q6PGH1	3	3	89.54	0.305736	1.36106	wild type	PD-L1-KO	Protein BUD31 homolog OS=Mus musculus GN=Bud31 PE=2 SV=1 - [BUD31_MOUSE]	262778	323427	369768	422593	417598	51268.3	281265	262730	526447	264840	430216	602823	674361	78248.4	281265	368058	2	2	1	2	1	0	2	1
Q6NXI6	3	3	185.91	0.305882	1.26224	PD-L1-KO	wild type	Regulation of nuclear pre-mRNA domain-containing protein 2 OS=Mus musculus GN=Rprd2 PE=1 SV=1 - [RPRD2_MOUSE]	61186.8	63292.3	38695.5	53076	48378.5	100742	60201.2	63638.3	122581	51827.3	45021.2	75712.3	78124.4	153758	60201.2	89150.8	0	1	3	2	2	2	3	2
Q9CZ83	3	3	55.95	0.306083	1.17746	PD-L1-KO	wild type	39S ribosomal protein L55, mitochondrial OS=Mus musculus GN=Mrpl55 PE=2 SV=1 - [RM55_MOUSE]	34752	34243.4	32398.7	29909.9	48750.6	33754.9	43746	28354	69621.8	28040.4	37695.1	42666.1	78725.4	51518.6	43746	39721.1	0	0	1	1	2	0	0	0
Q78PY7	24	24	901.74	0.30641	1.17153	wild type	PD-L1-KO	Staphylococcal nuclease domain-containing protein 1 OS=Mus musculus GN=Snd1 PE=1 SV=1 - [SND1_MOUSE]	1.23829e+06	1.08466e+06	973198	1.11602e+06	847018	1.48237e+06	782126	654649	2.48078e+06	888177	1.13229e+06	1.59199e+06	1.36781e+06	2.26247e+06	782126	917098	7	9	10	9	11	14	3	5
E9Q1P8	1	1	113.95	0.30677	1.33469	PD-L1-KO	wild type	Interferon regulatory factor 2-binding protein 2 OS=Mus musculus GN=Irf2bp2 PE=1 SV=1 - [I2BP2_MOUSE]	25462.4	39978.7	27052.8	40096.1	28359.8	70456.7	37089	41060.9	51011.1	32736.8	31475.2	57196.5	45797.1	107535	37089	57522.2	1	0	1	1	1	0	1	1
P62996	8	8	470.29	0.307005	1.26423	wild type	PD-L1-KO	Transformer-2 protein homolog beta OS=Mus musculus GN=Tra2b PE=1 SV=1 - [TRA2B_MOUSE]	2.72533e+06	2.89976e+06	2.05407e+06	3.21258e+06	1.47965e+06	3.03032e+06	3.11774e+06	987611	5.4599e+06	2.37449e+06	2.38986e+06	4.5827e+06	2.38943e+06	4.62503e+06	3.11774e+06	1.38354e+06	10	9	5	8	5	8	7	3
P62830	6	6	313.4	0.307225	1.16317	wild type	PD-L1-KO	60S ribosomal protein L23 OS=Mus musculus GN=Rpl23 PE=1 SV=1 - [RL23_MOUSE]	1.64151e+06	1.49415e+06	1.19028e+06	1.12043e+06	1.0097e+06	1.42572e+06	1.32717e+06	919736	3.28859e+06	1.22349e+06	1.38486e+06	1.59828e+06	1.63053e+06	2.17601e+06	1.32717e+06	1.28846e+06	3	4	3	3	3	4	5	1
Q9QZD9	11	11	554.97	0.307556	1.22288	wild type	PD-L1-KO	Eukaryotic translation initiation factor 3 subunit I OS=Mus musculus GN=Eif3i PE=1 SV=1 - [EIF3I_MOUSE]	1.12928e+06	1.20378e+06	935164	1.09479e+06	385825	1.98086e+06	833610	367535	2.2624e+06	985723	1.08804e+06	1.5617e+06	623052	3.02329e+06	833610	514879	4	4	5	3	5	6	3	2
Q8C7E9	4	2	282.11	0.307812	1.33569	wild type	PD-L1-KO	Cleavage stimulation factor subunit 2 tau variant OS=Mus musculus GN=Cstf2t PE=1 SV=2 - [CSTFT_MOUSE]	14330.2	34112.4	22902.1	30701.6	37940.6	34357.1	2.63816	4099.25	28708.9	27933.2	26646	43795.5	61268.7	52437.7	2.63816	5742.64	0	1	1	1	1	1	0	0
Q9CWE0	1	1	23.2	0.307851	1.13706	PD-L1-KO	wild type	Mitochondrial fission regulator 1-like OS=Mus musculus GN=Mtfr1l PE=1 SV=1 - [MFR1L_MOUSE]	106.097	146.592	1609.42	4.26764	1069.19	229.105	214.644	609.246	212.553	120.037	1872.52	6.08773	1726.59	349.672	214.644	853.492	0	0	1	0	0	0	0	0
Q9ET30	4	4	93.99	0.309931	1.3977	wild type	PD-L1-KO	Transmembrane 9 superfamily member 3 OS=Mus musculus GN=Tm9sf3 PE=1 SV=1 - [TM9S3_MOUSE]	80781.7	80404.8	88005.9	39328.3	53360.3	16604.6	82331.8	54128.3	161837	65839.9	102393	56101.4	86169.3	25342.9	82331.8	75828.3	0	0	3	0	2	0	1	2
Q9CQM9	9	9	444.55	0.311024	1.22748	wild type	PD-L1-KO	Glutaredoxin-3 OS=Mus musculus GN=Glrx3 PE=1 SV=1 - [GLRX3_MOUSE]	413069	433417	469842	398495	506922	340451	398270	151378	827539	354906	546650	568448	818608	519614	398270	212065	1	1	4	3	4	1	2	2
Q8QZV7	5	5	199.68	0.311392	1.13114	PD-L1-KO	wild type	Protein asunder homolog OS=Mus musculus GN=Asun PE=1 SV=2 - [ASUN_MOUSE]	47844.4	69675.8	40427.4	40468.4	55352.8	54110.1	62202.8	52770.2	95851.1	57054.4	47036.3	57727.6	89386.9	82585.7	62202.8	73925.8	2	2	0	3	2	0	3	2
Q9D8V0	1	1	33.8	0.311592	1.52746	wild type	PD-L1-KO	Minor histocompatibility antigen H13 OS=Mus musculus GN=Hm13 PE=1 SV=1 - [HM13_MOUSE]	191651	138637	109276	60295.1	65303.1	13186.4	119634	129126	383952	113523	127140	86010.2	105455	20125.8	119634	180892	0	0	1	0	0	0	0	0
P97461	2	2	137.5	0.311842	1.27942	wild type	PD-L1-KO	40S ribosomal protein S5 OS=Mus musculus GN=Rps5 PE=2 SV=3 - [RS5_MOUSE]	798996	717813	1.01635e+06	509482	791720	546468	714374	325570	1.6007e+06	587785	1.1825e+06	726770	1.27852e+06	834048	714374	456091	1	1	2	1	2	1	0	0
P70441	7	7	365.18	0.312216	1.18896	wild type	PD-L1-KO	Na(+)/H(+) exchange regulatory cofactor NHE-RF1 OS=Mus musculus GN=Slc9a3r1 PE=1 SV=3 - [NHRF1_MOUSE]	1.3715e+06	1.57721e+06	1.05273e+06	1.56893e+06	928617	1.34544e+06	1.5634e+06	847631	2.74765e+06	1.2915e+06	1.22482e+06	2.23806e+06	1.49958e+06	2.05348e+06	1.5634e+06	1.18745e+06	5	3	6	4	7	5	5	4
Q62384	1	1	53.06	0.315043	1.3315	wild type	PD-L1-KO	Zinc finger protein ZPR1 OS=Mus musculus GN=Znf259 PE=1 SV=1 - [ZPR1_MOUSE]	55774.6	82636	39824.4	36088.6	34824.5	38145.5	60736.2	27258.2	111738	67666.9	46334.7	51479.9	56236.6	58219.7	60736.2	38186	0	0	1	0	0	0	1	0
P51410	12	12	588.96	0.315266	1.23312	wild type	PD-L1-KO	60S ribosomal protein L9 OS=Mus musculus GN=Rpl9 PE=2 SV=2 - [RL9_MOUSE]	6.0183e+06	5.14696e+06	4.75026e+06	5.43615e+06	3.6286e+06	7.53702e+06	4.37194e+06	1.77761e+06	1.2057e+07	4.21462e+06	5.52681e+06	7.7546e+06	5.85968e+06	1.15034e+07	4.37194e+06	2.49025e+06	9	6	7	7	8	8	6	5
P62754	14	12	712.42	0.315633	1.25342	wild type	PD-L1-KO	40S ribosomal protein S6 OS=Mus musculus GN=Rps6 PE=1 SV=1 - [RS6_MOUSE]	1.39159e+06	1.47739e+06	1.32729e+06	808817	974735	1.54316e+06	834242	641014	2.78791e+06	1.20977e+06	1.54427e+06	1.15377e+06	1.57406e+06	2.35525e+06	834242	897997	6	4	3	5	4	10	3	3
Q9CQJ4	3	3	99.07	0.316423	1.42841	wild type	PD-L1-KO	E3 ubiquitin-protein ligase RING2 OS=Mus musculus GN=Rnf2 PE=1 SV=1 - [RING2_MOUSE]	171480	209980	493255	248170	130073	205835	315753	134449	343542	171943	573890	354012	210050	314156	315753	188350	1	1	3	2	2	0	1	1
Q9CWK3	5	4	190.4	0.316549	1.25432	PD-L1-KO	wild type	CD2 antigen cytoplasmic tail-binding protein 2 OS=Mus musculus GN=Cd2bp2 PE=1 SV=1 - [CD2B2_MOUSE]	119173	157870	95167.9	182043	165214	252154	150208	127636	238750	129273	110726	259682	266797	384850	150208	178805	2	2	2	3	2	2	1	2
Q91WS2	2	2	56.38	0.31754	1.19224	PD-L1-KO	wild type	NACHT, LRR and PYD domains-containing protein 6 OS=Mus musculus GN=Nlrp6 PE=2 SV=3 - [NALP6_MOUSE]	9200.19	10534.4	0	0	355.159	13494.3	298.624	9380.18	18431.6	8626.13	0	0	573.531	20595.7	298.624	13140.7	1	1	0	0	0	0	0	1
P59999	8	8	415.33	0.317924	1.16551	wild type	PD-L1-KO	Actin-related protein 2/3 complex subunit 4 OS=Mus musculus GN=Arpc4 PE=1 SV=3 - [ARPC4_MOUSE]	3.79169e+06	4.21423e+06	2.65935e+06	3.11485e+06	2.41506e+06	3.37925e+06	3.46113e+06	2.5678e+06	7.59624e+06	3.45085e+06	3.09409e+06	4.4433e+06	3.89998e+06	5.15759e+06	3.46113e+06	3.59723e+06	8	7	5	3	7	11	5	5
Q99KK7	12	12	745.06	0.318458	1.25114	wild type	PD-L1-KO	Dipeptidyl peptidase 3 OS=Mus musculus GN=Dpp3 PE=2 SV=2 - [DPP3_MOUSE]	1.68941e+06	1.73432e+06	1.03533e+06	1.62859e+06	956435	1.84972e+06	1.38819e+06	671336	3.38454e+06	1.42016e+06	1.20458e+06	2.32316e+06	1.54451e+06	2.82313e+06	1.38819e+06	940474	8	8	5	8	6	8	8	5
P62900	3	3	138.06	0.318852	1.70844	wild type	PD-L1-KO	60S ribosomal protein L31 OS=Mus musculus GN=Rpl31 PE=2 SV=1 - [RL31_MOUSE]	372702	218291	375405	86285.6	269132	10659.7	213231	123143	746669	178749	436774	123085	434610	16269.4	213231	172510	3	2	2	1	1	0	2	1
Q91X21	1	1	22.45	0.318924	1.20911	wild type	PD-L1-KO	Uncharacterized protein KIAA2013 OS=Mus musculus GN=Kiaa2013 PE=2 SV=1 - [K2013_MOUSE]	24633.3	35128.1	24778	18922.1	15586.2	23251.1	20603.9	26127	49350.2	28764.9	28828.6	26992.1	25169.6	35487	20603.9	36601.3	0	0	0	0	1	0	0	0
P62862	2	2	59.81	0.319729	1.36127	PD-L1-KO	wild type	40S ribosomal protein S30 OS=Mus musculus GN=Fau PE=2 SV=1 - [RS30_MOUSE]	158.511	27.8154	47340.7	18083.8	29048.7	926.255	37029.7	22309.3	317.559	22.7768	55079.8	25796.3	46909.6	1413.7	37029.7	31253.1	0	0	2	1	2	0	1	0
P56376	1	1	66.39	0.320098	2.08736	PD-L1-KO	wild type	Acylphosphatase-1 OS=Mus musculus GN=Acyp1 PE=2 SV=2 - [ACYP1_MOUSE]	82187.8	49279.3	586.953	6819.12	64532.3	187261	12719.5	25365.1	164654	40352.6	682.905	9727.39	104210	285807	12719.5	35533.9	0	0	0	0	1	0	0	0
Q9D3P8	3	3	163.46	0.320259	1.21367	wild type	PD-L1-KO	Plasminogen receptor (KT) OS=Mus musculus GN=Plgrkt PE=1 SV=1 - [PLRKT_MOUSE]	171997	222059	138776	207259	147429	183948	188251	90166.4	344577	181834	161463	295652	238077	280751	188251	126314	2	2	1	1	1	1	1	2
Q8K124	2	2	134.21	0.320378	1.1649	wild type	PD-L1-KO	Pleckstrin homology domain-containing family O member 2 OS=Mus musculus GN=Plekho2 PE=1 SV=1 - [PKHO2_MOUSE]	99304.4	98366.8	94885.7	74393	60448.3	69198.4	120747	64611.6	198946	80548.1	110397	106121	97615.4	105614	120747	90514.3	2	1	2	1	1	1	1	2
Q61189	4	4	202.46	0.320496	1.27076	wild type	PD-L1-KO	Methylosome subunit pICln OS=Mus musculus GN=Clns1a PE=1 SV=1 - [ICLN_MOUSE]	230965	219607	198920	228083	194389	256812	187622	51770.8	462714	179826	231439	325358	313911	391960	187622	72525.7	2	1	1	2	1	2	2	0
Q9D1K7	2	2	47.25	0.320759	1.68987	wild type	PD-L1-KO	UPF0687 protein C20orf27 homolog OS=Mus musculus PE=2 SV=3 - [CT027_MOUSE]	26720.4	53771	35483.6	55772.9	32329.2	46978.1	0	22326.4	53531.4	44030.7	41284.3	79559.3	52207	71700.4	0	31277	1	0	0	0	1	0	0	0
Q9Z2I9	5	5	235.71	0.321259	1.18922	wild type	PD-L1-KO	Succinyl-CoA ligase [ADP-forming] subunit beta, mitochondrial OS=Mus musculus GN=Sucla2 PE=1 SV=2 - [SUCB1_MOUSE]	539807	511321	420753	375509	368606	266649	607051	311139	1.08145e+06	418698	489536	535659	595246	406974	607051	435875	3	2	4	3	3	3	3	3
Q9D020	1	1	22.19	0.321278	1.33296	PD-L1-KO	wild type	Cytosolic 5'-nucleotidase 3 OS=Mus musculus GN=Nt5c3 PE=1 SV=4 - [5NT3_MOUSE]	70.3654	26.6252	6366.41	0	4363.55	60.901	96.7867	4094.21	140.97	21.8022	7407.17	0	7046.52	92.9503	96.7867	5735.58	0	0	1	0	0	0	0	0
P08207	5	5	244.04	0.321295	1.37596	wild type	PD-L1-KO	Protein S100-A10 OS=Mus musculus GN=S100a10 PE=2 SV=2 - [S10AA_MOUSE]	3.19086e+06	2.15762e+06	2.237e+06	1.34291e+06	2.03417e+06	544418	2.2537e+06	1.65655e+06	6.39254e+06	1.76677e+06	2.6027e+06	1.91565e+06	3.28489e+06	830919	2.2537e+06	2.32067e+06	10	3	6	3	6	3	3	5
P70269	1	1	32.33	0.3217	1.26301	wild type	PD-L1-KO	Cathepsin E OS=Mus musculus GN=Ctse PE=1 SV=2 - [CATE_MOUSE]	131758	113838	93905.5	118283	32581.4	99178.6	114210	116486	263964	93217	109257	168729	52614.4	151372	114210	163185	1	1	1	0	0	0	1	1
P70404	10	10	651.31	0.321719	1.19342	wild type	PD-L1-KO	Isocitrate dehydrogenase [NAD] subunit gamma 1, mitochondrial OS=Mus musculus GN=Idh3g PE=1 SV=1 - [IDHG1_MOUSE]	972040	1.09829e+06	1.3415e+06	915400	1.07715e+06	781442	1.21097e+06	556330	1.94738e+06	899338	1.56081e+06	1.30581e+06	1.73944e+06	1.19268e+06	1.21097e+06	779363	4	5	7	7	7	4	8	4
Q9D7N3	1	1	37.69	0.32203	1.31024	wild type	PD-L1-KO	28S ribosomal protein S9, mitochondrial OS=Mus musculus GN=Mrps9 PE=1 SV=3 - [RT09_MOUSE]	279977	287817	204764	264134	45432.6	291385	276250	178158	560904	235681	238238	376784	73367.3	444727	276250	249581	0	0	1	0	1	0	0	0
Q8C0E2	2	2	108.13	0.32214	1.12423	wild type	PD-L1-KO	Vacuolar protein sorting-associated protein 26B OS=Mus musculus GN=Vps26b PE=1 SV=1 - [VP26B_MOUSE]	65366.9	71253.9	67681.8	89103.6	61378.5	51429.3	73679.9	74497.5	130956	58346.7	78746.2	127105	99117.6	78494.1	73679.9	104363	1	0	2	1	2	1	1	1
P10854	112	34	4062.32	0.322436	1.09514	PD-L1-KO	wild type	Histone H2B type 1-M OS=Mus musculus GN=Hist1h2bm PE=1 SV=2 - [H2B1M_MOUSE]	1.30682e+06	1.29353e+06	1.1849e+06	1.69201e+06	1.34353e+06	1.5923e+06	1.42485e+06	1.63771e+06	2.61807e+06	1.05921e+06	1.37861e+06	2.41363e+06	2.1696e+06	2.43025e+06	1.42485e+06	2.29427e+06	7	5	16	6	7	6	10	1
Q9CPU0	2	2	70.55	0.323041	1.35045	wild type	PD-L1-KO	Lactoylglutathione lyase OS=Mus musculus GN=Glo1 PE=1 SV=3 - [LGUL_MOUSE]	114919	91378	133238	71046.9	81105	14059.1	141165	67705.4	230228	74825.4	155019	101347	130973	21457.8	141165	94848.5	1	0	1	0	1	0	1	1
Q8K019	7	6	200.1	0.323272	1.25567	PD-L1-KO	wild type	Bcl-2-associated transcription factor 1 OS=Mus musculus GN=Bclaf1 PE=1 SV=2 - [BCLF1_MOUSE]	86099.8	96247.3	161134	218290	201578	115698	198716	189407	172492	78812.6	187475	311387	325520	176584	198716	265341	0	0	1	2	3	0	1	2
Q6PDG5	4	3	205.72	0.32407	1.40008	wild type	PD-L1-KO	SWI/SNF complex subunit SMARCC2 OS=Mus musculus GN=Smarcc2 PE=1 SV=2 - [SMRC2_MOUSE]	131360	90283.6	140203	55134.6	97619.7	28395.3	122601	49211.2	263166	73929.2	163123	78648.8	157642	43338.4	122601	68940	1	1	3	2	3	0	2	1
Q8K2B3	28	27	1518.45	0.324294	1.12458	wild type	PD-L1-KO	Succinate dehydrogenase [ubiquinone] flavoprotein subunit, mitochondrial OS=Mus musculus GN=Sdha PE=1 SV=1 - [DHSA_MOUSE]	2.49052e+06	2.2896e+06	2.24548e+06	2.34323e+06	2.50138e+06	2.25971e+06	2.1676e+06	1.40229e+06	4.9895e+06	1.87485e+06	2.61256e+06	3.34259e+06	4.03937e+06	3.44889e+06	2.1676e+06	1.96447e+06	8	10	15	16	21	15	18	13
Q9D7G0	5	1	188.71	0.324682	2.24028	wild type	PD-L1-KO	Ribose-phosphate pyrophosphokinase 1 OS=Mus musculus GN=Prps1 PE=1 SV=4 - [PRPS1_MOUSE]	25499.3	23354.3	6871.47	81987.3	34269	6338.84	12231.1	8632.1	51085.2	19123.8	7994.78	116954	55339.6	9674.67	12231.1	12092.7	0	0	0	1	1	0	0	0
Q9D0I9	9	9	300.71	0.324714	1.18664	wild type	PD-L1-KO	Arginine--tRNA ligase, cytoplasmic OS=Mus musculus GN=Rars PE=2 SV=2 - [SYRC_MOUSE]	332377	251190	218828	219198	289772	232410	190914	147820	665881	205688	254601	312684	467940	354717	190914	207080	2	1	3	1	3	1	2	1
Q7TPR4	21	8	1113.94	0.324877	1.15564	wild type	PD-L1-KO	Alpha-actinin-1 OS=Mus musculus GN=Actn1 PE=1 SV=1 - [ACTN1_MOUSE]	160217	169951	257035	162541	177345	158247	161248	151932	320978	139165	299054	231863	286386	241525	161248	212841	4	2	5	0	5	1	3	2
O88983	3	3	150.08	0.325232	1.25292	wild type	PD-L1-KO	Syntaxin-8 OS=Mus musculus GN=Stx8 PE=1 SV=1 - [STX8_MOUSE]	21033.1	27242.4	31170.7	27589	24810.6	41361.1	12672.6	6584.55	42137.6	22307.6	36266.3	39355.3	40065.5	63127.6	12672.6	9224.3	0	0	1	0	1	0	0	0
Q8VCI5	3	3	180.56	0.325649	1.20837	wild type	PD-L1-KO	Peroxisomal biogenesis factor 19 OS=Mus musculus GN=Pex19 PE=1 SV=1 - [PEX19_MOUSE]	87962	116198	68017.4	65459.6	64959.3	88436.8	70576.6	55441.6	176222	95149.5	79136.5	93377.3	104900	134977	70576.6	77668.2	1	0	1	2	1	1	2	1
Q8CHP8	1	1	39.35	0.325981	1.28324	wild type	PD-L1-KO	Phosphoglycolate phosphatase OS=Mus musculus GN=Pgp PE=2 SV=1 - [PGP_MOUSE]	40366	50692.1	23090.9	33673.4	23036.4	8607.86	66320.7	17229.4	80869	41509.5	26865.7	48034.6	37200.5	13137.8	66320.7	24136.6	1	0	1	0	1	0	1	0
Q8R010	1	1	84.53	0.326335	4.02281	PD-L1-KO	wild type	Aminoacyl tRNA synthase complex-interacting multifunctional protein 2 OS=Mus musculus GN=Aimp2 PE=1 SV=2 - [AIMP2_MOUSE]	4739.76	4369.59	9452.35	85790.3	186214	1860.91	157118	74596.3	9495.6	3578.06	10997.6	122379	300709	2840.22	157118	104502	0	0	0	1	1	0	1	0
Q91X20	2	2	77.81	0.326377	1.47836	PD-L1-KO	wild type	Set1/Ash2 histone methyltransferase complex subunit ASH2 OS=Mus musculus GN=Ash2l PE=1 SV=1 - [ASH2L_MOUSE]	73176.5	71138.3	26191.5	67052.5	71677.6	42027	100866	136627	146601	58252	30473.1	95649.5	115749	64143.8	100866	191400	1	0	0	1	1	0	1	0
Q9Z1Q9	13	13	706	0.326737	1.16656	wild type	PD-L1-KO	Valine--tRNA ligase OS=Mus musculus GN=Vars PE=2 SV=1 - [SYVC_MOUSE]	1.15807e+06	1.03929e+06	1.0222e+06	866490	1.02251e+06	1.20526e+06	691638	583266	2.32008e+06	851030	1.18931e+06	1.23604e+06	1.6512e+06	1.83953e+06	691638	817097	4	4	6	3	5	7	4	4
Q9D710	3	3	134.49	0.326947	2.90822	PD-L1-KO	wild type	Thioredoxin-related transmembrane protein 2 OS=Mus musculus GN=Tmx2 PE=2 SV=1 - [TMX2_MOUSE]	7856.69	5757.48	13063.3	4057.05	57291.5	3265.01	11316.1	17510.2	15740	4714.54	15198.8	5787.34	92517.6	4983.24	11316.1	24530.1	0	0	1	0	3	0	0	1
P47758	5	5	200.79	0.327042	1.1522	wild type	PD-L1-KO	Signal recognition particle receptor subunit beta OS=Mus musculus GN=Srprb PE=1 SV=1 - [SRPRB_MOUSE]	217960	256119	195871	268032	204917	267407	199701	142053	436660	209724	227891	382345	330911	408130	199701	199001	1	1	2	2	1	3	1	1
Q60953	7	7	306.67	0.327292	1.19243	wild type	PD-L1-KO	Protein PML OS=Mus musculus GN=Pml PE=1 SV=3 - [PML_MOUSE]	196867	204006	181919	161794	161435	80770.7	224058	158162	394401	167052	211658	230798	260695	123276	224058	221569	2	2	6	1	5	0	2	3
Q91ZW2	1	1	62.16	0.327563	1.24781	wild type	PD-L1-KO	GDP-fucose protein O-fucosyltransferase 1 OS=Mus musculus GN=Pofut1 PE=1 SV=1 - [OFUT1_MOUSE]	17242.9	15601.5	15535.4	10013.5	9896.43	18917.1	11928.2	6054.81	34544.2	12775.4	18075.1	14284.1	15981.3	28872.3	11928.2	8482.17	1	0	1	1	1	0	1	0
P28474	12	12	554.62	0.327607	1.23423	wild type	PD-L1-KO	Alcohol dehydrogenase class-3 OS=Mus musculus GN=Adh5 PE=1 SV=3 - [ADHX_MOUSE]	565392	669200	409195	595046	434686	524537	625786	228938	1.1327e+06	547978	476088	848825	701956	800576	625786	320719	5	5	5	4	7	6	4	4
Q8K4L0	1	1	49.55	0.327808	1.5233	wild type	PD-L1-KO	ATP-dependent RNA helicase DDX54 OS=Mus musculus GN=Ddx54 PE=1 SV=1 - [DDX54_MOUSE]	18269.8	35653.4	8615.07	67161.5	48289.2	4361.65	32376.9	116.362	36601.6	29195	10023.4	95805	77980.2	6656.99	32376.9	163.012	0	0	0	0	1	0	0	0
P35601	2	2	124.31	0.328251	1.288	PD-L1-KO	wild type	Replication factor C subunit 1 OS=Mus musculus GN=Rfc1 PE=1 SV=2 - [RFC1_MOUSE]	46925.2	63790.7	40731.7	66043	48687.1	105199	73583.6	52658.1	94009.6	52235.4	47390.4	94209.4	78622.8	160560	73583.6	73768.7	2	2	2	1	2	2	2	2
Q99LB2	3	3	61.25	0.328389	1.76478	PD-L1-KO	wild type	Dehydrogenase/reductase SDR family member 4 OS=Mus musculus GN=Dhrs4 PE=2 SV=3 - [DHRS4_MOUSE]	17497.6	18769.9	30029.4	7877.54	20532.7	11487.7	37684.1	61197	35054.5	15369.8	34938.5	11237.2	33157.4	17533.2	37684.1	85730.9	0	0	1	0	1	1	1	1
Q8BU14	1	1	40.46	0.328591	1.59756	wild type	PD-L1-KO	Translocation protein SEC62 OS=Mus musculus GN=Sec62 PE=1 SV=1 - [SEC62_MOUSE]	36418.8	15553.6	18243.7	6747.45	9342.77	3644.38	28144.7	7043.9	72961.1	12736.1	21226.1	9625.16	15087.2	5562.24	28144.7	9867.8	0	0	1	0	1	0	0	0
P48962	14	2	565.02	0.328736	1.23911	wild type	PD-L1-KO	ADP/ATP translocase 1 OS=Mus musculus GN=Slc25a4 PE=1 SV=4 - [ADT1_MOUSE]	186837	142063	135388	103188	149096	93698	149734	65444.4	374309	116329	157520	147196	240769	143007	149734	91681	1	1	0	1	1	0	1	1
Q61699	21	20	768.58	0.329307	1.10741	wild type	PD-L1-KO	Heat shock protein 105 kDa OS=Mus musculus GN=Hsph1 PE=1 SV=2 - [HS105_MOUSE]	536068	544770	460675	512781	409516	593595	480661	371265	1.07395e+06	446087	535984	731475	661310	905976	480661	520105	3	3	11	9	6	8	5	7
Q8QZT1	13	12	555.7	0.329818	1.2291	wild type	PD-L1-KO	Acetyl-CoA acetyltransferase, mitochondrial OS=Mus musculus GN=Acat1 PE=1 SV=1 - [THIL_MOUSE]	1.45638e+06	1.86247e+06	1.38984e+06	1.35671e+06	1.52628e+06	1.32231e+06	1.54653e+06	539735	2.9177e+06	1.5251e+06	1.61705e+06	1.93533e+06	2.46472e+06	2.01817e+06	1.54653e+06	756114	8	4	7	6	6	6	5	4
Q5SWD9	2	2	104.31	0.331027	1.42457	wild type	PD-L1-KO	Pre-rRNA-processing protein TSR1 homolog OS=Mus musculus GN=Tsr1 PE=2 SV=1 - [TSR1_MOUSE]	59135.2	23114.4	28145.7	21388	24770.1	41196.6	14247.8	12293.2	118471	18927.3	32746.8	30509.7	40000.2	62876.5	14247.8	17221.5	0	0	1	0	2	1	0	0
Q9CS42	8	4	444.2	0.331212	1.31574	wild type	PD-L1-KO	Ribose-phosphate pyrophosphokinase 2 OS=Mus musculus GN=Prps2 PE=1 SV=4 - [PRPS2_MOUSE]	140313	139500	171726	69161.7	134324	93979.2	84536	82908.3	281102	114230	199799	98658.2	216915	143436	84536	116146	0	1	3	2	3	0	1	2
Q9JHJ3	2	2	87.08	0.331228	1.63739	wild type	PD-L1-KO	Lysosomal protein NCU-G1 OS=Mus musculus PE=1 SV=1 - [NCUG1_MOUSE]	7569.03	21091.3	36380.6	84716.1	1699.56	6009.76	70272.4	13479.3	15163.7	17270.7	42327.9	120846	2744.55	9172.41	70272.4	18883.1	0	0	1	2	0	0	1	0
Q8CD10	3	2	155.6	0.331465	1.39558	PD-L1-KO	wild type	EF-hand domain-containing family member A1 OS=Mus musculus GN=Efha1 PE=2 SV=2 - [EFHA1_MOUSE]	5015.09	14468.5	10640	35296.1	31888.1	10739.1	20987.4	27683.6	10047.2	11847.6	12379.4	50349.4	51494.7	16390.6	20987.4	38782	0	0	0	1	0	1	0	0
Q8C0M9	2	2	113.44	0.331817	1.18488	wild type	PD-L1-KO	Isoaspartyl peptidase/L-asparaginase OS=Mus musculus GN=Asrgl1 PE=1 SV=1 - [ASGL1_MOUSE]	78182.2	92833.7	58053.2	56820	55806.1	76784.7	60577.4	48113.4	156630	76017.4	67543.4	81053	90119	117193	60577.4	67402	1	1	0	2	0	2	1	0
Q9Z2N8	6	6	232.05	0.332001	1.25051	wild type	PD-L1-KO	Actin-like protein 6A OS=Mus musculus GN=Actl6a PE=1 SV=2 - [ACL6A_MOUSE]	335320	293967	288683	326890	345704	359103	212494	78177	671777	240717	335875	466305	558263	548083	212494	109518	2	0	2	1	2	1	0	0
Q8VD31	3	3	107.04	0.332163	1.26482	wild type	PD-L1-KO	Tapasin-related protein OS=Mus musculus GN=Tapbpl PE=2 SV=2 - [TPSNR_MOUSE]	77154.5	71561.7	93263	69877.7	79246.1	75191.5	72224.8	19899.3	154571	58598.7	108509	99679.7	127971	114761	72224.8	27876.9	1	1	2	1	3	1	0	0
Q64310	6	6	410.74	0.332678	1.34992	wild type	PD-L1-KO	Surfeit locus protein 4 OS=Mus musculus GN=Surf4 PE=2 SV=1 - [SURF4_MOUSE]	535036	375265	535154	333471	466257	63631.1	405021	382895	1.07189e+06	307288	622639	475693	752939	97117.2	405021	536397	1	2	3	3	3	0	3	3
P40124	38	38	1694.89	0.332928	1.18354	wild type	PD-L1-KO	Adenylyl cyclase-associated protein 1 OS=Mus musculus GN=Cap1 PE=1 SV=4 - [CAP1_MOUSE]	1.62079e+07	1.20304e+07	9.54159e+06	9.55853e+06	1.13207e+07	9.29361e+06	1.09701e+07	8.4128e+06	3.24708e+07	9.85117e+06	1.11014e+07	1.36351e+07	1.82814e+07	1.41844e+07	1.09701e+07	1.17855e+07	36	26	24	20	21	24	23	24
Q80W00	2	2	67.74	0.333268	1.84759	PD-L1-KO	wild type	Serine/threonine-protein phosphatase 1 regulatory subunit 10 OS=Mus musculus GN=Ppp1r10 PE=1 SV=1 - [PP1RA_MOUSE]	701.538	2120.42	25826.5	11023	30616.3	2514.88	13420.6	26744.8	1405.46	1736.32	30048.5	15724.1	49441	3838.35	13420.6	37466.8	0	0	0	0	2	0	0	1
Q91WV0	1	1	51.64	0.333686	1.16824	wild type	PD-L1-KO	Protein Dr1 OS=Mus musculus GN=Dr1 PE=2 SV=1 - [NC2B_MOUSE]	276009	289555	193348	231735	152078	215957	288200	191750	552955	237104	224956	330567	245585	329605	288200	268623	0	1	1	1	1	0	1	1
Q01853	47	47	2640.49	0.333992	1.10681	wild type	PD-L1-KO	Transitional endoplasmic reticulum ATPase OS=Mus musculus GN=Vcp PE=1 SV=4 - [TERA_MOUSE]	1.20633e+07	1.15478e+07	1.19448e+07	1.05305e+07	1.04853e+07	1.25241e+07	1.10279e+07	7.60165e+06	2.41674e+07	9.45597e+06	1.38975e+07	1.50217e+07	1.69322e+07	1.91149e+07	1.10279e+07	1.06491e+07	35	29	32	30	33	27	32	23
P63260	169	4	8330.56	0.33427	1.57511	wild type	PD-L1-KO	Actin, cytoplasmic 2 OS=Mus musculus GN=Actg1 PE=1 SV=1 - [ACTG_MOUSE]	655723	1.20371e+06	315995	390242	303759	281790	437494	605836	1.31367e+06	985666	367653	556675	490529	430083	437494	848715	4	0	0	0	0	0	0	0
Q9JL26	17	17	716.16	0.33439	1.18981	wild type	PD-L1-KO	Formin-like protein 1 OS=Mus musculus GN=Fmnl1 PE=1 SV=1 - [FMNL_MOUSE]	1.23745e+06	1.10594e+06	1.66991e+06	1.5124e+06	1.27713e+06	1.69286e+06	860663	813545	2.47911e+06	905601	1.9429e+06	2.15742e+06	2.06238e+06	2.58374e+06	860663	1.13969e+06	6	3	6	4	7	4	5	5
P03930	2	2	109.23	0.334828	1.68739	PD-L1-KO	wild type	ATP synthase protein 8 OS=Mus musculus GN=Mtatp8 PE=1 SV=1 - [ATP8_MOUSE]	9793.49	20338.2	72503.8	30663.3	79871	14555	61803.6	68697.5	19620.2	16654	84356.4	43740.8	128980	22214.7	61803.6	96238.2	0	1	1	0	2	0	1	1
P23492	5	5	262.91	0.334853	1.2209	wild type	PD-L1-KO	Purine nucleoside phosphorylase OS=Mus musculus GN=Pnp PE=1 SV=2 - [PNPH_MOUSE]	286331	274877	262116	344387	241391	149620	489825	75596.7	573633	225085	304965	491264	389812	228358	489825	105903	4	4	2	2	2	1	5	1
O88512	1	1	43.67	0.335042	1.69262	wild type	PD-L1-KO	AP-1 complex subunit gamma-like 2 OS=Mus musculus GN=Ap1g2 PE=2 SV=2 - [AP1G2_MOUSE]	18054.4	11852.2	12357.9	3651.66	8819.19	1309.01	8331.69	8667.41	36170.1	9705.22	14378.1	5209.05	14241.7	1997.88	8331.69	12142.2	1	0	0	0	0	0	0	0
Q31125	3	3	49.77	0.335655	1.1896	PD-L1-KO	wild type	Zinc transporter SLC39A7 OS=Mus musculus GN=Slc39a7 PE=1 SV=2 - [S39A7_MOUSE]	53080.1	31283.3	51868.3	35424.5	68735	41456.7	47540.7	46470.6	106340	25616.5	60347.5	50532.6	110997	63273.5	47540.7	65100.6	0	0	1	1	1	1	1	1
Q8BG32	5	5	235.64	0.336339	1.2454	wild type	PD-L1-KO	26S proteasome non-ATPase regulatory subunit 11 OS=Mus musculus GN=Psmd11 PE=1 SV=3 - [PSD11_MOUSE]	335031	307561	367740	379784	288819	523628	229447	74311.1	671199	251848	427856	541758	466401	799188	229447	104102	2	1	3	1	1	1	1	0
Q9WVM1	1	1	57.92	0.336464	1.29577	PD-L1-KO	wild type	Rac GTPase-activating protein 1 OS=Mus musculus GN=Racgap1 PE=2 SV=1 - [RGAP1_MOUSE]	1717.52	7613.14	4495.29	8508.41	0	24681.6	504.232	3754.37	3440.87	6234.06	5230.16	12137.1	0	37670.3	504.232	5259.5	0	0	0	0	0	1	0	0
Q61003	1	1	51.51	0.336544	1.43899	PD-L1-KO	wild type	T-cell differentiation antigen CD6 OS=Mus musculus GN=Cd6 PE=2 SV=2 - [CD6_MOUSE]	34070.9	44989.2	29846.9	31105.7	32059.2	78009.4	63782.4	27625.5	68257.3	36839.6	34726.2	44371.9	51771.1	119062	63782.4	38700.5	0	0	0	0	1	0	0	0
Q9DC04	2	2	120.22	0.337988	1.3253	wild type	PD-L1-KO	Regulator of G-protein signaling 3 OS=Mus musculus GN=Rgs3 PE=1 SV=2 - [RGS3_MOUSE]	77393.1	115424	44231.8	69150.9	40924.8	68401.8	75716.6	45997.6	155049	94515.2	51462.6	98642.8	66087.8	104398	75716.6	64438	1	1	1	1	1	1	2	1
Q8BJ71	16	13	726.15	0.338321	1.16717	wild type	PD-L1-KO	Nuclear pore complex protein Nup93 OS=Mus musculus GN=Nup93 PE=2 SV=1 - [NUP93_MOUSE]	1.25823e+06	1.20109e+06	962382	930202	887857	721313	1.42687e+06	692556	2.52073e+06	983521	1.11971e+06	1.32692e+06	1.43376e+06	1.10091e+06	1.42687e+06	970202	4	5	5	4	4	5	7	7
Q4VBD2	1	1	21.61	0.33858	1.17195	PD-L1-KO	wild type	Transmembrane anterior posterior transformation protein 1 OS=Mus musculus GN=Tapt1 PE=2 SV=2 - [TAPT1_MOUSE]	8458.78	5577.73	10732.3	14695.2	12542.4	10467.9	11108.8	12130.6	16946.3	4567.35	12486.8	20962.6	20254.3	15976.7	11108.8	16993.8	0	0	0	1	0	0	1	0
Q9JHR7	1	1	46.94	0.338684	64.7936	wild type	PD-L1-KO	Insulin-degrading enzyme OS=Mus musculus GN=Ide PE=1 SV=1 - [IDE_MOUSE]	7139.36	2686.82	0	0	0.00514506	151.648	0	0	14302.9	2200.12	0	0	0.00830854	231.454	0	0	1	0	0	0	0	0	0	0
P62821	9	3	490.21	0.338887	1.30437	wild type	PD-L1-KO	Ras-related protein Rab-1A OS=Mus musculus GN=Rab1A PE=1 SV=3 - [RAB1A_MOUSE]	654711	592297	408686	324700	408560	173109	556099	380508	1.31164e+06	485006	475496	463181	659767	264208	556099	533053	1	0	2	0	2	1	0	0
P56959	23	19	1311.1	0.339005	1.20348	wild type	PD-L1-KO	RNA-binding protein FUS OS=Mus musculus GN=Fus PE=2 SV=1 - [FUS_MOUSE]	5.08659e+06	5.17367e+06	6.12621e+06	5.61331e+06	6.35976e+06	4.44982e+06	5.42036e+06	2.05014e+06	1.01904e+07	4.23648e+06	7.12769e+06	8.00732e+06	1.02701e+07	6.79155e+06	5.42036e+06	2.87204e+06	12	13	13	12	15	11	14	10
Q8VDF2	5	4	205.63	0.339038	1.67344	PD-L1-KO	wild type	E3 ubiquitin-protein ligase UHRF1 OS=Mus musculus GN=Uhrf1 PE=1 SV=2 - [UHRF1_MOUSE]	45779.9	60261.4	46307.2	88501.5	56322.7	213878	51627.5	81219	91715.1	49345.3	53877.3	126246	90953.2	326432	51627.5	113780	1	1	2	1	2	3	1	2
Q9WUZ9	1	1	34.81	0.339081	1.50727	PD-L1-KO	wild type	Ectonucleoside triphosphate diphosphohydrolase 5 OS=Mus musculus GN=Entpd5 PE=1 SV=1 - [ENTP5_MOUSE]	6392.9	9464.71	14.2776	5667.44	9573.6	7216.77	11522.2	4153.06	12807.5	7750.23	16.6116	8084.53	15460	11014.6	11522.2	5818.02	1	1	0	0	0	1	1	0
Q6DVA0	2	2	80.42	0.339293	1.16519	wild type	PD-L1-KO	LEM domain-containing protein 2 OS=Mus musculus GN=Lemd2 PE=1 SV=1 - [LEMD2_MOUSE]	23090.5	27722.9	15583.8	8974.25	40710.6	20507.4	1460.16	2008.05	46259.3	22701	18131.4	12801.7	65741.8	31299.4	1460.16	2813.08	0	0	0	0	2	0	0	0
P15327	1	1	37.75	0.339603	5.91944	wild type	PD-L1-KO	Bisphosphoglycerate mutase OS=Mus musculus GN=Bpgm PE=2 SV=2 - [PMGE_MOUSE]	946.724	299.342	30519.2	591.238	4509.79	383.3	573.057	0	1896.66	245.118	35508.4	843.394	7282.68	585.013	573.057	0	0	0	1	0	0	0	0	0
Q91ZJ5	4	4	151.19	0.340106	1.2292	wild type	PD-L1-KO	UTP--glucose-1-phosphate uridylyltransferase OS=Mus musculus GN=Ugp2 PE=2 SV=3 - [UGPA_MOUSE]	152047	215472	144210	220402	111515	277650	131482	74971.6	304609	176441	167785	314401	180081	423763	131482	105028	3	2	1	2	2	2	3	2
P48193	1	1	81.73	0.34038	1.21648	wild type	PD-L1-KO	Protein 4.1 OS=Mus musculus GN=Epb41 PE=1 SV=2 - [41_MOUSE]	53346.9	44197.7	57532.6	34220.7	47427.8	22201.3	44534.2	41448.3	106875	36191.5	66937.8	48815.4	76589.2	33884.8	44534.2	58064.9	1	1	1	0	1	0	1	0
O70433	1	1	24.98	0.340444	1.39862	PD-L1-KO	wild type	Four and a half LIM domains protein 2 OS=Mus musculus GN=Fhl2 PE=1 SV=1 - [FHL2_MOUSE]	14413.8	11543.8	0	4115.83	13484.5	5402.74	9448.48	13725.7	28876.5	9452.69	0	5871.18	21775.5	8245.95	9448.48	19228.3	0	0	0	0	0	0	0	0
Q61035	16	15	658.68	0.340729	1.19229	wild type	PD-L1-KO	Histidine--tRNA ligase, cytoplasmic OS=Mus musculus GN=Hars PE=2 SV=2 - [SYHC_MOUSE]	885761	986672	682470	938681	746028	1.076e+06	698497	409634	1.77453e+06	807942	794037	1.33902e+06	1.20473e+06	1.64224e+06	698497	573856	3	3	9	3	7	4	7	4
Q3UHD9	1	1	42.68	0.340743	1.27233	PD-L1-KO	wild type	Arf-GAP with GTPase, ANK repeat and PH domain-containing protein 2 OS=Mus musculus GN=Agap2 PE=1 SV=1 - [AGAP2_MOUSE]	10429	6825.92	8690.36	2596.67	10886.9	9361.91	9674.82	6391.35	20893.4	5589.44	10111	3704.11	17580.7	14288.6	9674.82	8953.64	1	1	0	0	0	0	1	0
Q501J6	28	18	1205.42	0.341136	1.07585	wild type	PD-L1-KO	Probable ATP-dependent RNA helicase DDX17 OS=Mus musculus GN=Ddx17 PE=2 SV=1 - [DDX17_MOUSE]	739375	831302	760947	927643	724853	765930	856534	682159	1.48126e+06	680716	885344	1.32327e+06	1.17053e+06	1.169e+06	856534	955636	4	4	9	7	9	2	8	7
Q5RJG1	1	1	37.13	0.341139	124.966	PD-L1-KO	wild type	Nucleolar protein 10 OS=Mus musculus GN=Nol10 PE=2 SV=1 - [NOL10_MOUSE]	558.485	0	0	0	50448	0	0	19343.5	1118.86	0	0	0	81466.4	0	0	27098.3	0	0	0	0	1	0	0	0
P62814	13	13	542.11	0.3416	1.15076	wild type	PD-L1-KO	V-type proton ATPase subunit B, brain isoform OS=Mus musculus GN=Atp6v1b2 PE=1 SV=1 - [VATB2_MOUSE]	585240	638004	542666	500005	536373	538668	593112	300910	1.17247e+06	522433	631379	713251	866167	822143	593112	421544	4	4	5	3	7	1	3	3
Q6PIU9	6	6	294.7	0.341703	1.20678	wild type	PD-L1-KO	Uncharacterized protein FLJ45252 homolog OS=Mus musculus PE=1 SV=2 - [YJ005_MOUSE]	608594	652838	594394	553517	217498	693994	754407	330613	1.21925e+06	534580	691563	789585	351229	1.05921e+06	754407	463155	4	3	2	4	1	4	4	1
Q06180	3	3	204.27	0.341977	1.08481	wild type	PD-L1-KO	Tyrosine-protein phosphatase non-receptor type 2 OS=Mus musculus GN=Ptpn2 PE=2 SV=2 - [PTN2_MOUSE]	65981.6	72057.6	82377	78500.4	77511.3	59390.9	75413	63231	132187	59004.7	95843.6	111980	125170	90645.5	75413	88580.3	1	1	2	1	1	1	1	1
Q80U28	1	1	59.52	0.342133	1.91725	wild type	PD-L1-KO	MAP kinase-activating death domain protein OS=Mus musculus GN=Madd PE=1 SV=2 - [MADD_MOUSE]	25153.5	18512.7	19451.2	2670.67	2965.01	14833	1401.92	15113.8	50392.4	15159.3	22631	3809.67	4788.06	22639	1401.92	21172.9	0	0	0	0	0	0	0	0
Q9Z2U0	14	14	655.26	0.342942	2.28751	PD-L1-KO	wild type	Proteasome subunit alpha type-7 OS=Mus musculus GN=Psma7 PE=1 SV=1 - [PSA7_MOUSE]	1.02014e+06	1.02762e+06	1.14247e+06	819710	1.13076e+06	758119	1.26817e+06	6.01575e+06	2.04375e+06	841474	1.32924e+06	1.16931e+06	1.82601e+06	1.15708e+06	1.26817e+06	8.42746e+06	8	6	8	5	7	6	7	4
P47915	4	4	103.48	0.343014	1.15097	PD-L1-KO	wild type	60S ribosomal protein L29 OS=Mus musculus GN=Rpl29 PE=2 SV=2 - [RL29_MOUSE]	4447.95	10220.8	70352.1	3083.48	42359.4	8865.75	24231.4	25949.3	8910.98	8369.38	81852.9	4398.54	68404.4	13531.4	24231.4	36352.4	0	0	2	0	2	0	0	0
Q7TMF2	1	1	20.67	0.343378	1.19915	PD-L1-KO	wild type	3'-5' exoribonuclease 1 OS=Mus musculus GN=Eri1 PE=1 SV=2 - [ERI1_MOUSE]	12345.4	6067.97	20653	834.779	14121.5	33630.4	95.486	0	24732.6	4968.79	24029.3	1190.8	22804.3	51328.5	95.486	0	0	0	0	0	1	0	0	0
Q3U2S8	2	2	40.92	0.343928	1.30417	PD-L1-KO	wild type	Voltage-gated hydrogen channel 1 OS=Mus musculus GN=Hvcn1 PE=1 SV=2 - [HVCN1_MOUSE]	4304.52	6054	65635.3	22922.6	58397	14609.4	25925.1	30072.6	8623.64	4957.35	76365	32698.8	94302.8	22297.7	25925.1	42128.7	0	0	1	0	1	0	0	1
Q99KC8	2	2	109.83	0.344042	4.37153	PD-L1-KO	wild type	von Willebrand factor A domain-containing protein 5A OS=Mus musculus GN=Vwa5a PE=1 SV=2 - [VMA5A_MOUSE]	9288.49	2131.76	5070.99	815.493	43622.6	875.993	5634.66	25523.6	18608.5	1745.6	5899.97	1163.29	70444.3	1336.99	5634.66	35756	0	0	0	0	2	0	0	1
Q9D0R2	8	8	339.64	0.34449	1.38032	wild type	PD-L1-KO	Threonine--tRNA ligase, cytoplasmic OS=Mus musculus GN=Tars PE=1 SV=2 - [SYTC_MOUSE]	153456	160129	207676	78339.5	143904	131673	117979	40836.1	307434	131122	241626	111750	232385	200966	117979	57207.3	2	2	2	1	1	2	2	2
O88874	2	2	90.78	0.34519	1.54749	PD-L1-KO	wild type	Cyclin-K OS=Mus musculus GN=Ccnk PE=1 SV=3 - [CCNK_MOUSE]	11038.5	18089.7	61921	67510.5	92587.2	20421.9	63734.9	68626.2	22114.5	14812.8	72043.6	96302.8	149515	31169	63734.9	96138.4	0	0	0	0	0	1	1	1
P51807	2	2	109.79	0.345447	1.16639	PD-L1-KO	wild type	Dynein light chain Tctex-type 1 OS=Mus musculus GN=Dynlt1 PE=1 SV=1 - [DYLT1_MOUSE]	29678.3	28473.2	29600.1	20035	32074.6	23156.3	39533.6	30956.3	59457.2	23315.4	34439	28579.7	51796	35342.4	39533.6	43366.7	0	0	2	1	2	1	1	2
Q9CPQ3	4	4	327.32	0.345478	1.26523	wild type	PD-L1-KO	Mitochondrial import receptor subunit TOM22 homolog OS=Mus musculus GN=Tomm22 PE=2 SV=3 - [TOM22_MOUSE]	911089	989440	613118	1.09012e+06	738115	765635	1.0528e+06	291745	1.82527e+06	810209	713348	1.55504e+06	1.19195e+06	1.16855e+06	1.0528e+06	408705	2	3	4	3	3	1	3	2
Q61598	24	19	1151.99	0.346149	1.15303	wild type	PD-L1-KO	Rab GDP dissociation inhibitor beta OS=Mus musculus GN=Gdi2 PE=1 SV=1 - [GDIB_MOUSE]	2.62112e+06	2.40187e+06	2.86826e+06	2.07526e+06	2.35193e+06	2.79219e+06	2.10115e+06	1.39847e+06	5.25114e+06	1.96678e+06	3.33716e+06	2.96033e+06	3.79803e+06	4.26158e+06	2.10115e+06	1.95911e+06	9	5	12	6	12	4	8	6
Q8BUI3	1	1	22.49	0.346503	1.39271	PD-L1-KO	wild type	Leucine-rich repeat and WD repeat-containing protein 1 OS=Mus musculus GN=LRWD1 PE=2 SV=1 - [LRWD1_MOUSE]	1380.54	12322.1	1767.46	17108.1	4675.71	20604.4	11002.7	9089.33	2765.76	10090	2056.4	24404.5	7550.61	31447.5	11002.7	12733.2	0	0	0	0	0	0	0	1
Q99LC2	3	3	147.67	0.346556	3.36139	PD-L1-KO	wild type	Cleavage stimulation factor subunit 1 OS=Mus musculus GN=Cstf1 PE=2 SV=1 - [CSTF1_MOUSE]	48214.4	39782.7	41372.1	29570.6	410973	39320.4	51785.3	32180	96592.4	32576.3	48135.4	42182	663662	60012.8	51785.3	45081	1	1	2	0	1	0	2	0
Q8BVU0	3	3	143.02	0.34678	1.20246	wild type	PD-L1-KO	Leucine-rich repeat and calponin homology domain-containing protein 3 OS=Mus musculus GN=Lrch3 PE=2 SV=3 - [LRCH3_MOUSE]	34574	41523.7	44391.3	26216.4	9680.69	68794.3	34465.1	9064.01	69265.3	34001.9	51648.2	37397.3	15632.9	104998	34465.1	12697.8	0	0	1	1	0	1	0	0
P97363	2	2	133.59	0.347338	1.3267	wild type	PD-L1-KO	Serine palmitoyltransferase 2 OS=Mus musculus GN=Sptlc2 PE=2 SV=2 - [SPTC2_MOUSE]	96916.8	101747	76336.1	50013.9	63390.7	19635.1	87093.7	74860.6	194162	83316.3	88815.2	71344.1	102367	29968.1	87093.7	104872	2	1	1	0	0	0	2	0
Q921M7	7	7	410.63	0.347416	1.16139	wild type	PD-L1-KO	Protein FAM49B OS=Mus musculus GN=Fam49b PE=2 SV=1 - [FA49B_MOUSE]	595339	533043	462032	342959	361953	450076	453060	399613	1.1927e+06	436485	537563	489226	584503	686930	453060	559818	4	3	3	3	5	3	3	2
Q3U487	1	1	23.01	0.347581	1.28489	wild type	PD-L1-KO	E3 ubiquitin-protein ligase HECTD3 OS=Mus musculus GN=Hectd3 PE=1 SV=2 - [HECD3_MOUSE]	17516.4	17767.6	11478.9	8336.46	9315.53	15829.2	9460.22	8277.63	35092.2	14549.1	13355.4	11891.9	15043.3	24159.4	9460.22	11596.1	0	0	0	0	0	0	0	1
Q8BH58	1	1	22	0.347659	1.5406	PD-L1-KO	wild type	TIP41-like protein OS=Mus musculus GN=Tiprl PE=2 SV=1 - [TIPRL_MOUSE]	1218.07	4514.31	41.8046	35660.6	10127.1	25284.7	881.867	27540.9	2440.28	3696.57	48.6387	50869.4	16353.9	38590.8	881.867	38582.1	0	0	0	0	0	1	0	0
P62482	1	1	74.05	0.34828	1.00406	wild type	PD-L1-KO	Voltage-gated potassium channel subunit beta-2 OS=Mus musculus GN=Kcnab2 PE=1 SV=1 - [KCAB2_MOUSE]	4522.02	5573.24	106167	8945.42	11069.7	36195	36761.2	40676	9059.38	4563.67	123523	12760.5	17876	55242.8	36761.2	56982.9	0	0	1	0	1	0	0	0
Q9QYJ3	9	9	218.68	0.348656	1.20646	wild type	PD-L1-KO	DnaJ homolog subfamily B member 1 OS=Mus musculus GN=Dnajb1 PE=2 SV=3 - [DNJB1_MOUSE]	299175	264955	227379	226755	108810	119771	314164	301266	599364	216960	264550	323464	175713	182800	314164	422043	1	1	3	2	2	1	2	2
P97452	3	3	69.96	0.349158	1.11381	wild type	PD-L1-KO	Ribosome biogenesis protein BOP1 OS=Mus musculus GN=Bop1 PE=1 SV=1 - [BOP1_MOUSE]	147866	119817	111470	139337	110350	149408	108460	97294	296234	98113	129692	198762	178200	228034	108460	136299	0	0	2	0	1	1	0	0
Q9D883	1	1	28.02	0.349256	1.22231	wild type	PD-L1-KO	Splicing factor U2AF 35 kDa subunit OS=Mus musculus GN=U2af1 PE=1 SV=4 - [U2AF1_MOUSE]	20815.3	9645.44	33322	3293.81	46774.6	5637.78	705.871	1758.57	41701.3	7898.22	38769.3	4698.58	75534.4	8604.68	705.871	2463.58	0	0	0	0	1	0	0	0
Q8CDG3	1	1	20.89	0.349613	1.23688	wild type	PD-L1-KO	Deubiquitinating protein VCIP135 OS=Mus musculus GN=Vcpip1 PE=2 SV=1 - [VCIP1_MOUSE]	9277.15	8224.44	6448.35	2580.71	572.123	12550	7512.82	814.759	18585.8	6734.63	7502.5	3681.35	923.897	19154.5	7512.82	1141.4	0	0	1	0	0	0	0	0
P97310	35	34	2081.95	0.349786	1.12258	wild type	PD-L1-KO	DNA replication licensing factor MCM2 OS=Mus musculus GN=Mcm2 PE=1 SV=3 - [MCM2_MOUSE]	3.9082e+06	4.56384e+06	3.77562e+06	4.39303e+06	3.4831e+06	4.66644e+06	4.07191e+06	2.60219e+06	7.82967e+06	3.73713e+06	4.39285e+06	6.2666e+06	5.62471e+06	7.12217e+06	4.07191e+06	3.64541e+06	15	9	18	13	19	12	14	17
Q9Z2W0	1	1	50.39	0.350325	1.89341	wild type	PD-L1-KO	Aspartyl aminopeptidase OS=Mus musculus GN=Dnpep PE=2 SV=2 - [DNPEP_MOUSE]	105506	118733	96398.4	17921.2	57052.9	60363.3	7754.84	53637.7	211369	97225.4	112157	25564.3	92132.3	92129.6	7754.84	75141.1	1	0	0	0	0	0	0	0
Q9QYF9	2	2	23.16	0.350497	1.4765	wild type	PD-L1-KO	Protein NDRG3 OS=Mus musculus GN=Ndrg3 PE=1 SV=1 - [NDRG3_MOUSE]	18323.6	59880.1	22133.5	21668	18577.7	39895.4	10582.4	13575.8	36709.3	49033.1	25751.8	30909.1	30000.3	60890.4	10582.4	19018.3	0	0	1	0	1	0	0	0
O09111	2	2	84.85	0.350976	1.32142	PD-L1-KO	wild type	NADH dehydrogenase [ubiquinone] 1 beta subcomplex subunit 11, mitochondrial OS=Mus musculus GN=Ndufb11 PE=1 SV=2 - [NDUBB_MOUSE]	7209.1	7802.22	68036.9	63795	57905.8	21557.3	72017.8	42560.6	14442.7	6388.89	79159.3	91002.8	93509.6	32901.9	72017.8	59623.1	0	0	2	1	1	0	1	1
Q60848	2	2	87.23	0.351096	1.13437	PD-L1-KO	wild type	Lymphocyte-specific helicase OS=Mus musculus GN=Hells PE=1 SV=2 - [HELLS_MOUSE]	57344.6	105038	67514.9	106054	92069.9	89658.7	102162	97204.3	114884	86011.3	78551.9	151285	148680	136842	102162	136173	2	2	1	1	1	1	2	1
Q9D1L0	1	1	46.41	0.351592	1.42802	PD-L1-KO	wild type	Coiled-coil-helix-coiled-coil-helix domain-containing protein 2, mitochondrial OS=Mus musculus GN=Chchd2 PE=1 SV=1 - [CHCH2_MOUSE]	58108.8	52007	30862.2	39431.6	35167.8	69183.4	44354.4	108922	116415	42586.2	35907.4	56248.7	56791	105591	44354.4	152589	1	0	0	0	0	0	0	0
Q99JX7	4	4	141	0.353538	1.24563	wild type	PD-L1-KO	Nuclear RNA export factor 1 OS=Mus musculus GN=Nxf1 PE=1 SV=3 - [NXF1_MOUSE]	42937.2	76756.1	65228.6	41680.8	74616	32542.4	38635.3	36124	86020	62852.2	75891.9	59457.1	120494	49668	38635.3	50606.1	1	0	1	0	3	1	0	0
Q8BJZ4	2	2	52.53	0.354379	1.30216	wild type	PD-L1-KO	28S ribosomal protein S35, mitochondrial OS=Mus musculus GN=Mrps35 PE=2 SV=2 - [RT35_MOUSE]	16550.4	25464.6	22161.8	23812	146.214	33162.6	16275.6	17986.9	33156.9	20851.8	25784.8	33967.6	236.115	50614.5	16275.6	25197.8	0	0	1	1	0	1	1	0
P97825	7	7	437.56	0.354616	1.16348	PD-L1-KO	wild type	Hematological and neurological expressed 1 protein OS=Mus musculus GN=Hn1 PE=1 SV=3 - [HN1_MOUSE]	965062	1.28651e+06	1.28138e+06	2.11049e+06	1.56881e+06	1.9605e+06	1.71264e+06	1.32408e+06	1.9334e+06	1.05346e+06	1.49085e+06	3.01059e+06	2.5334e+06	2.99222e+06	1.71264e+06	1.8549e+06	4	6	4	7	4	5	5	5
Q9Z2D6	2	2	31.03	0.35462	1.71024	PD-L1-KO	wild type	Methyl-CpG-binding protein 2 OS=Mus musculus GN=Mecp2 PE=1 SV=1 - [MECP2_MOUSE]	87.011	769.76	15147.2	1034.76	19707.4	859.036	1475.29	7098.45	174.317	630.322	17623.3	1476.08	31824.7	1311.11	1475.29	9944.22	0	0	1	0	1	0	0	0
Q6PR54	3	3	200.83	0.354646	1.16723	wild type	PD-L1-KO	Telomere-associated protein RIF1 OS=Mus musculus GN=Rif1 PE=1 SV=2 - [RIF1_MOUSE]	88199.8	117777	72020.5	87249.7	63225.8	112130	65811.4	71749.8	176699	96442.5	83794.1	124461	102101	171139	65811.4	100514	1	1	1	1	2	2	0	0
Q62523	7	7	358.7	0.355177	1.11661	wild type	PD-L1-KO	Zyxin OS=Mus musculus GN=Zyx PE=1 SV=2 - [ZYX_MOUSE]	1.54878e+06	1.24143e+06	1.09106e+06	1.13924e+06	1.06419e+06	1.3856e+06	1.08554e+06	960847	3.10282e+06	1.01655e+06	1.26942e+06	1.62511e+06	1.71852e+06	2.11478e+06	1.08554e+06	1.34605e+06	9	8	9	7	9	8	8	6
O70469	2	2	75.7	0.355245	1.35429	wild type	PD-L1-KO	Docking protein 2 OS=Mus musculus GN=Dok2 PE=1 SV=1 - [DOK2_MOUSE]	427478	517368	305957	277085	381905	395564	35712.2	315003	856407	423650	355974	395258	616723	603731	35712.2	441287	0	0	0	1	1	0	1	0
Q8BGQ7	5	5	276.28	0.355864	1.19034	wild type	PD-L1-KO	Alanine--tRNA ligase, cytoplasmic OS=Mus musculus GN=Aars PE=1 SV=1 - [SYAC_MOUSE]	161994	146628	115670	122014	148313	162603	83577.3	64457.2	324538	120067	134579	174051	239504	248173	83577.3	90298.1	1	1	2	2	2	3	0	2
Q5SPW0	1	1	22.71	0.355918	Infinity	PD-L1-KO	wild type	Vacuolar protein sorting-associated protein 54 OS=Mus musculus GN=Vps54 PE=1 SV=1 - [VPS54_MOUSE]	0	0	0	0	0	0	0	9155.53	0	0	0	0	0	0	0	12826	0	0	0	0	0	0	0	1
Q8VDP4	18	18	1091.45	0.356411	1.157	wild type	PD-L1-KO	DBIRD complex subunit KIAA1967 homolog OS=Mus musculus PE=1 SV=2 - [K1967_MOUSE]	1.2213e+06	1.40873e+06	1.22016e+06	1.13863e+06	1.35472e+06	621808	1.36332e+06	972026	2.44674e+06	1.15355e+06	1.41963e+06	1.62424e+06	2.18768e+06	949036	1.36332e+06	1.36171e+06	6	6	9	10	10	4	10	9
Q99LJ1	1	1	20.87	0.356533	1.5531	wild type	PD-L1-KO	Tissue alpha-L-fucosidase OS=Mus musculus GN=Fuca1 PE=2 SV=1 - [FUCO_MOUSE]	10248.8	9652.91	7562.44	2546.31	6989.56	3201.14	7441.3	1690.92	20532.4	7904.34	8798.71	3632.28	11287.1	4885.74	7441.3	2368.8	1	0	0	0	0	0	0	0
A2BH40	8	6	407.02	0.35705	1.12356	wild type	PD-L1-KO	AT-rich interactive domain-containing protein 1A OS=Mus musculus GN=Arid1a PE=1 SV=1 - [ARI1A_MOUSE]	225778	260814	203357	214203	186687	283137	177250	157645	452323	213569	236601	305558	301474	432139	177250	220845	2	0	3	2	3	2	2	3
Q9D9K3	4	4	159.48	0.357646	1.74002	wild type	PD-L1-KO	Cell death regulator Aven OS=Mus musculus GN=Aven PE=1 SV=2 - [AVEN_MOUSE]	17029.5	13571.7	62683.3	54291.4	41470.4	22871.9	10881.7	9588.92	34116.7	11113.2	72930.5	77445.9	66968.9	34908.3	10881.7	13433.1	0	0	2	1	2	0	0	0
Q8JZR0	5	5	184.29	0.357696	1.40555	wild type	PD-L1-KO	Long-chain-fatty-acid--CoA ligase 5 OS=Mus musculus GN=Acsl5 PE=2 SV=1 - [ACSL5_MOUSE]	119642	96803.3	174694	54654.9	112686	72590.8	88030.9	43859.6	239690	79267.9	203252	77964.5	181972	110792	88030.9	61442.8	1	1	4	1	2	0	2	1
P28574	1	1	80.87	0.358077	1.27875	PD-L1-KO	wild type	Protein max OS=Mus musculus GN=Max PE=1 SV=1 - [MAX_MOUSE]	39603.3	60500.9	39435.4	79786.8	74882.2	97233.9	66804.1	41543.3	79340.8	49541.5	45882.1	113815	120924	148403	66804.1	58198	1	1	1	1	1	1	1	1
Q9DCB8	3	3	158.33	0.35909	1.52869	PD-L1-KO	wild type	Iron-sulfur cluster assembly 2 homolog, mitochondrial OS=Mus musculus GN=Isca2 PE=2 SV=2 - [ISCA2_MOUSE]	48667.8	33167.3	60773.4	40820.5	89994.9	45038.3	31531.9	113841	97500.8	27159.2	70708.3	58229.9	145329	68739.8	31531.9	159480	0	0	1	0	1	1	1	3
P81069	1	1	34.93	0.359501	1.60783	wild type	PD-L1-KO	GA-binding protein subunit beta-2 OS=Mus musculus GN=Gabpb2 PE=2 SV=2 - [GABP2_MOUSE]	23557	46260.7	176.361	32543.2	699.843	60956	2107.27	10.3469	47193.9	37880.8	205.192	46422.5	1130.15	93034.3	2107.27	14.4949	0	0	0	0	0	1	0	0
P51150	14	14	726.09	0.359813	1.07972	wild type	PD-L1-KO	Ras-related protein Rab-7a OS=Mus musculus GN=Rab7a PE=1 SV=2 - [RAB7A_MOUSE]	2.5887e+06	2.98052e+06	2.45404e+06	2.43473e+06	2.49907e+06	2.53383e+06	2.66407e+06	1.98888e+06	5.18619e+06	2.44061e+06	2.85522e+06	3.47311e+06	4.03564e+06	3.86727e+06	2.66407e+06	2.78622e+06	12	9	10	8	11	7	11	5
P12399	1	1	41.4	0.360073	1.3204	wild type	PD-L1-KO	Protein CTLA-2-alpha OS=Mus musculus GN=Ctla2a PE=2 SV=2 - [CTL2A_MOUSE]	61827.8	98716.1	79569	166373	91806.4	23976	157714	34354.1	123865	80834.2	92576.5	237330	148254	36593.4	157714	48126.7	1	0	1	1	1	0	1	0
O35972	2	2	78.99	0.3601	1.37122	PD-L1-KO	wild type	39S ribosomal protein L23, mitochondrial OS=Mus musculus GN=Mrpl23 PE=2 SV=1 - [RM23_MOUSE]	39457.6	46141.8	34019.7	51004.5	34409.8	79206.6	37850.6	82495.6	79049.1	37783.5	39581.1	72757.2	55567	120889	37850.6	115568	1	1	1	1	1	1	1	0
Q3UZ39	21	20	1072.57	0.360903	1.11503	wild type	PD-L1-KO	Leucine-rich repeat flightless-interacting protein 1 OS=Mus musculus GN=Lrrfip1 PE=1 SV=2 - [LRRF1_MOUSE]	4.08429e+06	3.55002e+06	3.05642e+06	2.79949e+06	2.7685e+06	3.4714e+06	3.23726e+06	2.6214e+06	8.18243e+06	2.90696e+06	3.55607e+06	3.99343e+06	4.47073e+06	5.29823e+06	3.23726e+06	3.67232e+06	11	6	12	7	9	11	7	9
O54890	1	1	41.91	0.361084	1.14777	wild type	PD-L1-KO	Integrin beta-3 OS=Mus musculus GN=Itgb3 PE=1 SV=2 - [ITB3_MOUSE]	49837.4	63291.8	54277.9	38553.7	46155.1	52522.3	35037.8	45729.3	99843.8	51826.8	63151	54996.4	74533.9	80162.3	35037.8	64062.2	1	0	0	0	0	0	1	0
P47754	16	10	701.93	0.361084	1.14746	wild type	PD-L1-KO	F-actin-capping protein subunit alpha-2 OS=Mus musculus GN=Capza2 PE=1 SV=3 - [CAZA2_MOUSE]	1.63909e+06	1.90874e+06	1.45119e+06	1.30619e+06	1.3684e+06	1.34839e+06	1.8206e+06	957544	3.28373e+06	1.56299e+06	1.68843e+06	1.86327e+06	2.20977e+06	2.05798e+06	1.8206e+06	1.34142e+06	4	3	6	2	4	2	3	2
Q921F4	13	12	455.43	0.361416	1.17165	wild type	PD-L1-KO	Heterogeneous nuclear ribonucleoprotein L-like OS=Mus musculus GN=Hnrpll PE=1 SV=3 - [HNRLL_MOUSE]	338396	313249	279636	403237	166462	264682	411292	296571	677940	256505	325350	575213	268812	403971	411292	415467	2	2	6	2	5	1	3	3
P97355	4	4	175.47	0.361817	1.19974	wild type	PD-L1-KO	Spermine synthase OS=Mus musculus GN=Sms PE=1 SV=1 - [SPSY_MOUSE]	199477	167642	144076	246279	141019	256037	130840	103470	399631	137274	167628	351314	227726	390778	130840	144951	2	0	3	2	2	2	1	1
P50518	2	2	107.37	0.362495	1.44863	wild type	PD-L1-KO	V-type proton ATPase subunit E 1 OS=Mus musculus GN=Atp6v1e1 PE=1 SV=2 - [VATE1_MOUSE]	79570.3	33851.8	70931.5	19068.7	35132.8	74077.6	31195.3	18.1816	159410	27719.7	82527.1	27201.3	56734.5	113061	31195.3	25.4705	2	1	1	0	1	0	1	0
Q9WVJ2	5	5	249.23	0.362496	1.18106	wild type	PD-L1-KO	26S proteasome non-ATPase regulatory subunit 13 OS=Mus musculus GN=Psmd13 PE=1 SV=1 - [PSD13_MOUSE]	324199	303756	326411	225991	316253	142357	317149	223648	649498	248732	379772	322373	510704	217273	317149	313308	3	3	2	3	2	0	4	2
Q9D787	2	2	104.05	0.362703	4.10903	wild type	PD-L1-KO	Peptidyl-prolyl cis-trans isomerase-like 2 OS=Mus musculus GN=Ppil2 PE=2 SV=2 - [PPIL2_MOUSE]	8434.9	11922.9	325215	58176.3	60322	4600.63	30580.2	2756.04	16898.4	9763.14	378379	82987.8	97411.5	7021.72	30580.2	3860.93	0	0	1	0	1	0	0	0
Q60865	2	2	109.43	0.362713	1.31004	wild type	PD-L1-KO	Caprin-1 OS=Mus musculus GN=Caprin1 PE=1 SV=2 - [CAPR1_MOUSE]	151398	133149	135121	65053.7	98813.6	48890.8	109472	112829	303310	109030	157210	92798.3	159570	74619.8	109472	158062	1	1	2	1	1	1	1	0
Q80X85	2	2	91.86	0.362883	1.43307	wild type	PD-L1-KO	28S ribosomal protein S7, mitochondrial OS=Mus musculus GN=Mrps7 PE=2 SV=1 - [RT07_MOUSE]	16579.9	27200.3	33150.2	11380.2	15975.8	4470.52	20640.1	20537.1	33216	22273.1	38569.5	16233.8	25798.6	6823.15	20640.1	28770.4	1	1	1	0	1	0	1	0
Q62167	14	8	658.23	0.362999	1.15009	wild type	PD-L1-KO	ATP-dependent RNA helicase DDX3X OS=Mus musculus GN=Ddx3x PE=1 SV=3 - [DDX3X_MOUSE]	286869	255317	230294	175874	236015	168226	239907	180443	574710	209068	267941	250883	381130	256756	239907	252783	3	3	2	0	3	3	0	3
Q3TKT4	6	6	346.95	0.363518	1.12019	PD-L1-KO	wild type	Transcription activator BRG1 OS=Mus musculus GN=Smarca4 PE=1 SV=1 - [SMCA4_MOUSE]	580647	659608	457593	544686	487572	653012	649406	722077	1.16326e+06	540123	532398	776987	787360	996662	649406	1.01156e+06	4	1	4	1	5	4	3	4
Q91YH5	5	5	281.41	0.363562	1.25368	wild type	PD-L1-KO	Atlastin-3 OS=Mus musculus GN=Atl3 PE=2 SV=1 - [ATLA3_MOUSE]	501893	487404	443048	804633	535372	547776	498981	202197	1.00549e+06	399114	515475	1.1478e+06	864550	836045	498981	283258	1	1	2	1	4	1	2	0
Q9CQA3	4	4	238.74	0.363839	2.14263	PD-L1-KO	wild type	Succinate dehydrogenase [ubiquinone] iron-sulfur subunit, mitochondrial OS=Mus musculus GN=Sdhb PE=1 SV=1 - [DHSB_MOUSE]	80658.9	64246.8	96914.5	89490.6	111412	44295.4	416148	138022	161591	52608.8	112758	127657	179914	67606.1	416148	193355	0	0	3	2	3	0	4	3
P52480	82	79	3920.72	0.363956	1.16148	wild type	PD-L1-KO	Pyruvate kinase isozymes M1/M2 OS=Mus musculus GN=Pkm PE=1 SV=4 - [KPYM_MOUSE]	3.27893e+07	3.08728e+07	2.52442e+07	3.12009e+07	2.49568e+07	4.0387e+07	2.29801e+07	1.50852e+07	6.56898e+07	2.52803e+07	2.9371e+07	4.45076e+07	4.03017e+07	6.16407e+07	2.29801e+07	2.11328e+07	55	49	53	48	50	42	44	36
Q14C51	2	2	64.29	0.36397	1.34899	wild type	PD-L1-KO	Pentatricopeptide repeat domain-containing protein 3, mitochondrial OS=Mus musculus GN=Ptcd3 PE=2 SV=2 - [PTCD3_MOUSE]	47047.9	104696	39823	51294.6	36127	30404.2	58620.6	54880.3	94255.5	85731	46333.1	73171.1	58340	46404.4	58620.6	76881.8	0	0	1	0	1	0	0	0
P63242	23	23	1228	0.36398	1.23672	wild type	PD-L1-KO	Eukaryotic translation initiation factor 5A-1 OS=Mus musculus GN=Eif5a PE=1 SV=2 - [IF5A1_MOUSE]	2.60658e+06	2.07603e+06	3.94612e+06	3.07955e+06	3.6095e+06	1.45341e+06	2.94828e+06	1.45603e+06	5.22201e+06	1.69997e+06	4.59122e+06	4.39294e+06	5.82883e+06	2.21827e+06	2.94828e+06	2.03975e+06	6	6	13	13	12	4	13	11
P62897	7	6	329.01	0.364539	1.47087	PD-L1-KO	wild type	Cytochrome c, somatic OS=Mus musculus GN=Cycs PE=1 SV=2 - [CYC_MOUSE]	72906.8	103062	526688	330007	514124	124525	431679	448590	146061	84392.9	612788	470751	830238	190056	431679	628429	0	0	5	3	5	0	3	2
Q9JHI7	1	1	41.25	0.365349	1.30603	PD-L1-KO	wild type	Exosome complex component RRP45 OS=Mus musculus GN=Exosc9 PE=2 SV=1 - [EXOS9_MOUSE]	51558.6	63427.6	2747.53	38626.6	42220.9	56172.1	41437.8	64381.2	103292	51938	3196.68	55100.3	68180.7	85732.8	41437.8	90191.6	0	1	0	0	0	1	0	0
Q60739	1	1	37.59	0.365407	3.04373	wild type	PD-L1-KO	BAG family molecular chaperone regulator 1 OS=Mus musculus GN=Bag1 PE=1 SV=3 - [BAG1_MOUSE]	4779.25	3960.27	415.978	350.6	191.039	653.651	1844.53	433.946	9574.7	3242.88	483.98	500.126	308.501	997.636	1844.53	607.915	1	0	0	0	0	0	0	0
P63094	2	1	127.88	0.36661	1.2876	wild type	PD-L1-KO	Guanine nucleotide-binding protein G(s) subunit alpha isoforms short OS=Mus musculus GN=Gnas PE=1 SV=1 - [GNAS2_MOUSE]	16690.4	18676.7	19510.7	15778.4	19957.2	16458	1197.3	17261.8	33437.4	15293.5	22700.3	22507.6	32228.1	25119.1	1197.3	24182.1	0	0	0	1	0	0	0	0
P25425	2	2	74.56	0.366943	1.39383	wild type	PD-L1-KO	POU domain, class 2, transcription factor 1 OS=Mus musculus GN=Pou2f1 PE=2 SV=3 - [PO2F1_MOUSE]	20135.5	8902.59	25620.3	19111.6	14057.3	23841.8	14460.1	566.985	40339.3	7289.93	29808.6	27262.4	22700.6	36388.6	14460.1	794.289	0	0	0	0	0	1	0	0
Q921J2	1	1	21.78	0.36701	3.74911	wild type	PD-L1-KO	GTP-binding protein Rheb OS=Mus musculus GN=Rheb PE=1 SV=1 - [RHEB_MOUSE]	4495.37	1470.06	30744.9	1282.9	49.5548	3216.47	4382.85	2485.07	9005.98	1203.77	35771	1830.05	80.024	4909.14	4382.85	3481.34	0	0	1	0	0	0	0	0
Q9R062	3	3	88.97	0.367207	1.18214	PD-L1-KO	wild type	Glycogenin-1 OS=Mus musculus GN=Gyg1 PE=2 SV=3 - [GLYG_MOUSE]	20085.9	35217.8	33757.8	61507.2	40723.4	51087.9	49550.9	36630.7	40239.9	28838.3	39276.4	87739.2	65762.5	77973	49550.9	51315.9	0	1	3	1	1	1	0	1
Q8BHG1	3	3	101.31	0.367448	1.16295	wild type	PD-L1-KO	Nardilysin OS=Mus musculus GN=Nrd1 PE=1 SV=1 - [NRDC_MOUSE]	40243.8	42077.6	44964.7	42349.1	50874.1	31649.8	44622.8	18720.1	80624.1	34455.5	52315.3	60410.4	82154.5	48305.6	44622.8	26224.9	2	0	1	0	1	1	1	0
P05064	29	29	1504.23	0.367587	1.14332	wild type	PD-L1-KO	Fructose-bisphosphate aldolase A OS=Mus musculus GN=Aldoa PE=1 SV=2 - [ALDOA_MOUSE]	9.74668e+06	9.0401e+06	7.64875e+06	6.88115e+06	6.8272e+06	9.6188e+06	7.62408e+06	5.07016e+06	1.95264e+07	7.40254e+06	8.89913e+06	9.81587e+06	1.1025e+07	1.46807e+07	7.62408e+06	7.10279e+06	24	22	21	14	17	18	13	9
Q9Z0H4	23	20	1057.92	0.368047	1.17833	wild type	PD-L1-KO	CUGBP Elav-like family member 2 OS=Mus musculus GN=Celf2 PE=1 SV=1 - [CELF2_MOUSE]	1.52529e+06	1.43094e+06	1.3802e+06	1.42808e+06	1.44041e+06	1.46387e+06	1.44079e+06	547044	3.05576e+06	1.17174e+06	1.60583e+06	2.03714e+06	2.32606e+06	2.23424e+06	1.44079e+06	766354	5	3	13	10	11	4	12	5
O09167	6	6	293.98	0.368524	1.32005	wild type	PD-L1-KO	60S ribosomal protein L21 OS=Mus musculus GN=Rpl21 PE=2 SV=3 - [RL21_MOUSE]	273526	244177	567353	300261	376313	125493	323748	223886	547980	199945	660101	428319	607692	191533	323748	313641	1	0	2	2	2	2	1	2
Q9CZW5	4	3	168.71	0.368975	1.30227	wild type	PD-L1-KO	Mitochondrial import receptor subunit TOM70 OS=Mus musculus GN=Tomm70a PE=1 SV=2 - [TOM70_MOUSE]	68308.5	43556.2	80624.3	66251.5	69005.1	9064.33	68422.6	52192.8	136849	35666.2	93804.4	94506.9	111433	13834.5	68422.6	73116.9	0	0	2	1	3	0	2	2
P59235	4	4	209.05	0.369511	1.32677	wild type	PD-L1-KO	Nucleoporin Nup43 OS=Mus musculus GN=Nup43 PE=2 SV=2 - [NUP43_MOUSE]	119068	195849	153118	271696	140418	142075	248813	26238	238540	160372	178149	387570	226755	216842	248813	36756.8	1	1	1	2	2	1	3	1
Q9Z255	1	1	56.13	0.369524	1.40163	PD-L1-KO	wild type	Ubiquitin-conjugating enzyme E2 A OS=Mus musculus GN=Ube2a PE=2 SV=1 - [UBE2A_MOUSE]	5327.51	5212.1	3670.27	11600.1	1063.84	33073.2	802.331	1236.51	10673.1	4267.96	4270.26	16547.3	1717.95	50478.1	802.331	1732.23	0	0	0	0	0	1	0	0
P47757	24	24	1227.97	0.370065	1.19546	wild type	PD-L1-KO	F-actin-capping protein subunit beta OS=Mus musculus GN=Capzb PE=1 SV=3 - [CAPZB_MOUSE]	2.20013e+06	2.20005e+06	2.89452e+06	3.20165e+06	2.2795e+06	1.13507e+06	3.14085e+06	2.22475e+06	4.40773e+06	1.80153e+06	3.36771e+06	4.56711e+06	3.68108e+06	1.7324e+06	3.14085e+06	3.11665e+06	14	17	19	10	14	7	16	14
P42230	6	1	268.83	0.370376	1.43894	PD-L1-KO	wild type	Signal transducer and activator of transcription 5A OS=Mus musculus GN=Stat5a PE=1 SV=1 - [STA5A_MOUSE]	14343.5	12370.5	7488.11	5556.66	10165.1	25791.6	13501	7752.83	28735.7	10129.6	8712.23	7926.5	16415.2	39364.5	13501	10860.9	0	0	0	1	0	0	1	0
Q9CYG7	8	8	592.35	0.370687	1.25915	wild type	PD-L1-KO	Mitochondrial import receptor subunit TOM34 OS=Mus musculus GN=Tomm34 PE=2 SV=1 - [TOM34_MOUSE]	228149	241586	281761	139248	212669	277365	136724	80659.1	457072	197824	327822	198636	343430	423329	136724	112995	3	2	4	2	3	2	2	3
Q91V12	11	11	544.9	0.370768	1.24047	wild type	PD-L1-KO	Cytosolic acyl coenzyme A thioester hydrolase OS=Mus musculus GN=Acot7 PE=1 SV=2 - [BACH_MOUSE]	570107	768488	442968	687698	203713	556308	709394	521167	1.14215e+06	629280	515383	980993	328968	849067	709394	730103	6	2	4	5	1	4	0	0
Q7TNC4	7	7	373.24	0.370852	1.16379	wild type	PD-L1-KO	Putative RNA-binding protein Luc7-like 2 OS=Mus musculus GN=Luc7l2 PE=1 SV=1 - [LC7L2_MOUSE]	1.07097e+06	1.34846e+06	1.04682e+06	1.32072e+06	1.19564e+06	1.32875e+06	1.01536e+06	573512	2.14557e+06	1.1042e+06	1.21795e+06	1.88399e+06	1.93078e+06	2.02801e+06	1.01536e+06	803433	4	3	3	3	5	3	3	2
Q99M51	3	3	218.52	0.370953	1.13799	wild type	PD-L1-KO	Cytoplasmic protein NCK1 OS=Mus musculus GN=Nck1 PE=1 SV=1 - [NCK1_MOUSE]	182385	175805	121008	137028	144267	152535	139463	105240	365389	143959	140790	195468	232971	232806	139463	147431	1	2	2	2	2	1	3	2
Q9ERS2	1	1	36.81	0.371369	1.12815	wild type	PD-L1-KO	NADH dehydrogenase [ubiquinone] 1 alpha subcomplex subunit 13 OS=Mus musculus GN=Ndufa13 PE=1 SV=3 - [NDUAD_MOUSE]	135936	124172	96181.8	95476.6	90817.8	87549.9	127514	94568.4	272334	101679	111905	136196	146658	133623	127514	132481	1	0	1	1	1	1	1	1
P14115	2	2	132.91	0.372156	1.30818	wild type	PD-L1-KO	60S ribosomal protein L27a OS=Mus musculus GN=Rpl27a PE=2 SV=5 - [RL27A_MOUSE]	592466	276863	906318	371349	992272	15216.4	299170	334547	1.18694e+06	226711	1.05448e+06	529725	1.60238e+06	23224	299170	468667	2	1	1	2	1	0	2	1
Q3UA37	1	1	75.44	0.372332	1.18458	wild type	PD-L1-KO	Glutamine-rich protein 1 OS=Mus musculus GN=Qrich1 PE=2 SV=1 - [QRIC1_MOUSE]	8955.68	10072.1	7658.14	8241.26	6785.94	11865.5	7524.02	3309.5	17941.7	8247.57	8910.05	11756	10958.3	18109.7	7524.02	4636.27	0	0	1	1	1	0	1	0
Q61335	3	1	113.04	0.373487	1.40618	PD-L1-KO	wild type	B-cell receptor-associated protein 31 OS=Mus musculus GN=Bcap31 PE=1 SV=4 - [BAP31_MOUSE]	17986.6	3593.24	16897.4	10643	22466.2	7627.86	19198.1	19780.1	36034.2	2942.35	19659.7	15182.2	36279.7	11642	19198.1	27709.9	0	0	1	0	1	0	1	1
Q9D6M3	1	1	57.49	0.3735	1.40653	PD-L1-KO	wild type	Mitochondrial glutamate carrier 1 OS=Mus musculus GN=Slc25a22 PE=1 SV=1 - [GHC1_MOUSE]	2202.96	3849.96	18064.5	0	845.044	10380.9	15928.3	6767.64	4413.39	3152.56	21017.6	0	1364.63	15843.9	15928.3	9480.79	0	0	1	0	0	0	0	0
P09450	1	1	20.57	0.373509	1.46042	wild type	PD-L1-KO	Transcription factor jun-B OS=Mus musculus GN=Junb PE=1 SV=1 - [JUNB_MOUSE]	5705.64	7445.51	20152.8	9078.76	4812.91	12665.5	8396.83	3145.54	11430.6	6096.79	23447.2	12950.7	7772.17	19330.8	8396.83	4406.59	0	0	0	0	0	0	1	0
Q9Z2X1	29	24	1639.37	0.373856	1.19954	wild type	PD-L1-KO	Heterogeneous nuclear ribonucleoprotein F OS=Mus musculus GN=Hnrnpf PE=1 SV=3 - [HNRPF_MOUSE]	8.95213e+06	8.36259e+06	6.19323e+06	7.15621e+06	7.22334e+06	7.44338e+06	8.02149e+06	2.87499e+06	1.79346e+07	6.84775e+06	7.20567e+06	1.02082e+07	1.16647e+07	1.13605e+07	8.02149e+06	4.02757e+06	28	20	15	15	16	27	19	12
Q6DFW4	9	9	618.47	0.374242	1.22124	wild type	PD-L1-KO	Nucleolar protein 58 OS=Mus musculus GN=Nop58 PE=1 SV=1 - [NOP58_MOUSE]	909400	989150	821200	1.37852e+06	895705	1.10264e+06	971502	385969	1.82188e+06	809971	955446	1.96644e+06	1.44644e+06	1.6829e+06	971502	540704	4	4	5	7	6	5	8	3
P97821	15	12	859.16	0.374277	1.27378	wild type	PD-L1-KO	Dipeptidyl peptidase 1 OS=Mus musculus GN=Ctsc PE=2 SV=1 - [CATC_MOUSE]	3.91609e+06	4.95034e+06	2.45652e+06	3.49884e+06	2.81117e+06	3.1144e+06	4.79888e+06	911614	7.84546e+06	4.05361e+06	2.8581e+06	4.99105e+06	4.53964e+06	4.75336e+06	4.79888e+06	1.27708e+06	8	9	6	6	6	8	9	4
P28352	1	1	53.76	0.374362	1.1266	wild type	PD-L1-KO	DNA-(apurinic or apyrimidinic site) lyase OS=Mus musculus GN=Apex1 PE=1 SV=2 - [APEX1_MOUSE]	129161	161623	139738	112266	132520	93230.1	151650	104394	258760	132346	162582	160146	214002	142293	151650	146246	1	1	1	1	1	0	1	1
O55106	14	14	905.51	0.375289	1.16398	wild type	PD-L1-KO	Striatin OS=Mus musculus GN=Strn PE=1 SV=2 - [STRN_MOUSE]	710452	891076	671575	1.00505e+06	637536	963177	752565	463055	1.42331e+06	729662	781361	1.43368e+06	1.02953e+06	1.47005e+06	752565	648693	5	6	7	6	8	6	7	6
Q3U898	3	3	138.64	0.376297	1.29966	wild type	PD-L1-KO	Myeloma-overexpressed gene 2 protein homolog OS=Mus musculus GN=Myeov2 PE=2 SV=1 - [MYOV2_MOUSE]	250158	212093	269659	409995	261928	23907.8	376048	216735	501165	173674	313741	584852	422976	36489.4	376048	303624	1	0	1	1	1	1	0	1
Q9D0L7	2	2	55.6	0.376871	1.56948	wild type	PD-L1-KO	Armadillo repeat-containing protein 10 OS=Mus musculus GN=Armc10 PE=1 SV=1 - [ARM10_MOUSE]	34589.3	48236.7	144180	53645.3	43824.2	38994.5	45723.4	50276.4	69296	39498.8	167750	76524.3	70769.9	59515.4	45723.4	70432.2	1	1	2	0	1	1	1	1
Q922K7	2	2	47.13	0.378332	1.83864	PD-L1-KO	wild type	Putative ribosomal RNA methyltransferase NOP2 OS=Mus musculus GN=Nop2 PE=2 SV=1 - [NOP2_MOUSE]	19400.8	14841.5	65654.4	33036	82394	12078.9	64028.3	85914.8	38867.4	12153	76387.3	47125.4	133055	18435.4	64028.3	120358	0	0	1	1	2	0	0	0
P68040	18	16	954.75	0.378558	1.22927	wild type	PD-L1-KO	Guanine nucleotide-binding protein subunit beta-2-like 1 OS=Mus musculus GN=Gnb2l1 PE=1 SV=3 - [GBLP_MOUSE]	5.13906e+06	6.10628e+06	3.70966e+06	4.19157e+06	2.88186e+06	6.61771e+06	4.81984e+06	1.25611e+06	1.02955e+07	5.00016e+06	4.3161e+06	5.97923e+06	4.65379e+06	1.01003e+07	4.81984e+06	1.75969e+06	14	11	12	9	11	16	11	8
Q8C407	1	1	53.29	0.379485	1.27191	wild type	PD-L1-KO	Protein YIPF4 OS=Mus musculus GN=Yipf4 PE=2 SV=1 - [YIPF4_MOUSE]	26300.8	41866.8	23238.9	33937.1	2876.42	44826.5	28807.5	22037.1	52690.8	34282.9	27037.9	48410.9	4645	68416.6	28807.5	30871.8	1	1	0	1	0	1	1	1
P17047	1	1	50.9	0.379625	1.23571	wild type	PD-L1-KO	Lysosome-associated membrane glycoprotein 2 OS=Mus musculus GN=Lamp2 PE=2 SV=2 - [LAMP2_MOUSE]	40221.2	50072.6	65234.3	34991.8	74000.1	24415.3	52689.1	3074.35	80578.8	41002.2	75898.5	49915.3	119500	37264	52689.1	4306.86	0	0	1	1	1	0	1	0
Q8BKS9	3	3	151.73	0.380433	1.14026	PD-L1-KO	wild type	Pumilio domain-containing protein KIAA0020 OS=Mus musculus GN=Kiaa0020 PE=2 SV=2 - [K0020_MOUSE]	12170.3	25499.4	20354.7	18338.1	23407.5	24522.8	20863.6	18279	24381.8	20880.3	23682.2	26159.1	37799.8	37427.9	20863.6	25607	0	0	0	1	1	1	0	0
E9Q557	6	5	244.06	0.380448	1.53708	wild type	PD-L1-KO	Desmoplakin OS=Mus musculus GN=Dsp PE=2 SV=1 - [DESP_MOUSE]	164686	80243	219482	55168.7	46655.8	44337	115685	131354	329932	65707.4	255362	78697.5	75342.5	67669.5	115685	184013	2	0	3	0	0	0	2	3
P97450	8	8	473.13	0.380667	1.10461	wild type	PD-L1-KO	ATP synthase-coupling factor 6, mitochondrial OS=Mus musculus GN=Atp5j PE=1 SV=1 - [ATP5J_MOUSE]	2.67119e+06	3.06343e+06	2.14057e+06	2.4323e+06	2.30843e+06	2.62977e+06	2.49352e+06	1.89961e+06	5.35144e+06	2.50851e+06	2.49051e+06	3.46965e+06	3.72779e+06	4.01369e+06	2.49352e+06	2.66116e+06	6	6	4	3	4	6	7	6
Q8BQ30	5	5	211.27	0.381208	1.11427	wild type	PD-L1-KO	Phostensin OS=Mus musculus GN=Ppp1r18 PE=1 SV=1 - [PPR18_MOUSE]	193565	205466	206943	146167	185126	152564	196887	140431	387786	168247	240773	208506	298953	232851	196887	196730	3	2	2	1	3	2	1	2
Q9ERF3	7	7	349.64	0.38204	1.21831	wild type	PD-L1-KO	WD repeat-containing protein 61 OS=Mus musculus GN=Wdr61 PE=2 SV=1 - [WDR61_MOUSE]	597528	588038	789301	486041	893790	358012	621983	146159	1.19708e+06	481518	918333	693332	1.44334e+06	546417	621983	204754	3	2	3	4	4	1	3	0
Q9ER88	2	2	99.77	0.38235	1.12292	PD-L1-KO	wild type	28S ribosomal protein S29, mitochondrial OS=Mus musculus GN=Dap3 PE=2 SV=1 - [RT29_MOUSE]	43922	47023.5	52566.7	80849.1	58163.2	70360.4	68217.2	55198.3	87993	38505.4	61160.1	115330	93925.4	107388	68217.2	77327.3	1	1	2	1	2	1	0	1
Q62077	7	7	261.1	0.383107	1.15903	wild type	PD-L1-KO	1-phosphatidylinositol 4,5-bisphosphate phosphodiesterase gamma-1 OS=Mus musculus GN=Plcg1 PE=1 SV=2 - [PLCG1_MOUSE]	104013	103939	149996	116782	136338	111756	98215.2	63283.9	208379	85111.3	174517	166588	220167	170568	98215.2	88654.3	1	1	4	0	4	2	0	0
P18653	4	2	157.29	0.383551	3.44673	wild type	PD-L1-KO	Ribosomal protein S6 kinase alpha-1 OS=Mus musculus GN=Rps6ka1 PE=1 SV=1 - [KS6A1_MOUSE]	11077.6	5045.2	31751.3	995.165	3883.52	1463.86	2461.7	6369.33	22192.8	4131.29	36941.8	1419.59	6271.33	2234.23	2461.7	8922.79	0	0	2	0	0	0	0	0
P14131	8	6	503.47	0.383611	1.15697	wild type	PD-L1-KO	40S ribosomal protein S16 OS=Mus musculus GN=Rps16 PE=2 SV=4 - [RS16_MOUSE]	956461	906567	1.32697e+06	978420	1.13224e+06	641573	1.16688e+06	662172	1.91617e+06	742347	1.54389e+06	1.3957e+06	1.82841e+06	979203	1.16688e+06	927636	6	5	8	6	7	6	7	6
P33609	2	2	110	0.383883	1.38469	PD-L1-KO	wild type	DNA polymerase alpha catalytic subunit OS=Mus musculus GN=Pola1 PE=1 SV=2 - [DPOLA_MOUSE]	15086.8	17490.5	48763.9	4470.15	47505.4	14934.8	17587.1	38794.8	30224.8	14322.2	56735.6	6376.62	76714.5	22794.3	17587.1	54347.6	0	0	2	0	2	0	1	0
P61967	1	1	120.89	0.384516	1.11551	wild type	PD-L1-KO	AP-1 complex subunit sigma-1A OS=Mus musculus GN=Ap1s1 PE=1 SV=1 - [AP1S1_MOUSE]	78929.7	90956.8	73456.6	64768.4	66919.3	85609.7	71654.3	52023.6	158127	74480.4	85465	92391.3	108065	130662	71654.3	72879.9	0	0	1	0	1	0	1	1
P97311	19	19	948.6	0.38486	1.11098	wild type	PD-L1-KO	DNA replication licensing factor MCM6 OS=Mus musculus GN=Mcm6 PE=1 SV=1 - [MCM6_MOUSE]	2.92865e+06	3.33328e+06	2.30825e+06	2.56895e+06	2.29993e+06	3.04547e+06	2.56966e+06	2.11138e+06	5.86724e+06	2.72948e+06	2.68559e+06	3.66458e+06	3.71405e+06	4.64816e+06	2.56966e+06	2.95783e+06	14	11	12	11	11	14	10	11
Q9ESE1	2	1	64.84	0.385203	1.18565	wild type	PD-L1-KO	Lipopolysaccharide-responsive and beige-like anchor protein OS=Mus musculus GN=Lrba PE=1 SV=1 - [LRBA_MOUSE]	4875.6	2307.97	1337.32	2149.62	440.32	5985.31	397.05	2177	9767.73	1889.89	1555.94	3066.4	711.054	9135.1	397.05	3049.76	1	0	0	0	0	0	0	0
Q9QYE6	3	2	134.93	0.385213	1.31978	PD-L1-KO	wild type	Golgin subfamily A member 5 OS=Mus musculus GN=Golga5 PE=1 SV=2 - [GOGA5_MOUSE]	12837.2	6778.84	15565.7	29196	16166.9	35140.1	20050.9	13606.5	25717.8	5550.89	18110.3	41647.7	26107.3	53632.6	20050.9	19061.3	1	0	1	1	1	0	0	0
O54984	1	1	56.11	0.385326	1.07811	wild type	PD-L1-KO	ATPase Asna1 OS=Mus musculus GN=Asna1 PE=1 SV=2 - [ASNA_MOUSE]	0	0	5993.85	5597.78	4114.91	19.2337	1588.24	5029.47	0	0	6973.69	7985.16	6644.99	29.3554	1588.24	7045.78	0	0	1	0	1	0	1	1
P54823	5	5	228.43	0.385333	1.17593	wild type	PD-L1-KO	Probable ATP-dependent RNA helicase DDX6 OS=Mus musculus GN=Ddx6 PE=2 SV=1 - [DDX6_MOUSE]	322328	265490	337952	476142	364997	355430	239318	232430	645749	217398	393199	679210	589418	542476	239318	325612	0	0	3	2	3	1	2	2
Q8BU33	4	4	116.72	0.385401	1.31346	wild type	PD-L1-KO	Acetolactate synthase-like protein OS=Mus musculus GN=Ilvbl PE=2 SV=1 - [ILVBL_MOUSE]	126165	182881	170412	265668	178318	175423	199107	14453.4	252758	149753	198270	378972	287958	267740	199107	20247.8	1	1	1	2	2	0	1	0
Q8BGT7	2	2	98.65	0.385801	1.11056	wild type	PD-L1-KO	Survival of motor neuron-related-splicing factor 30 OS=Mus musculus GN=Smndc1 PE=2 SV=1 - [SPF30_MOUSE]	354058	398173	319135	299407	329733	287806	384586	232181	709317	326046	371306	427101	532472	439265	384586	325262	0	1	1	1	1	1	2	1
Q61102	5	5	366.39	0.386056	1.22225	wild type	PD-L1-KO	ATP-binding cassette sub-family B member 7, mitochondrial OS=Mus musculus GN=Abcb7 PE=1 SV=3 - [ABCB7_MOUSE]	142103	146154	143872	125654	160090	99119	179853	17295	284689	119679	167391	179244	258523	151281	179853	24228.6	0	1	3	3	3	0	2	0
Q63850	4	4	167.66	0.386844	1.34918	PD-L1-KO	wild type	Nuclear pore glycoprotein p62 OS=Mus musculus GN=Nup62 PE=1 SV=2 - [NUP62_MOUSE]	12970.9	10915.5	50711.3	13969.2	51291.4	28408	13864.4	25928.7	25985.9	8938.22	59001.4	19926.9	82828.4	43357.8	13864.4	36323.6	0	0	2	1	3	0	1	1
Q6GQT1	1	1	38.54	0.387077	1484.09	wild type	PD-L1-KO	Alpha-2-macroglobulin-P OS=Mus musculus GN=A2mp PE=2 SV=2 - [A2MP_MOUSE]	0	0	115.536	79619.3	0	0	51.8106	1.91591	0	0	134.424	113576	0	0	51.8106	2.684	0	0	0	1	0	0	0	0
P47791	2	2	166.54	0.38782	1.18644	wild type	PD-L1-KO	Glutathione reductase, mitochondrial OS=Mus musculus GN=Gsr PE=2 SV=3 - [GSHR_MOUSE]	119012	170172	125899	99930	61980.4	116084	133507	122512	238428	139346	146480	142549	100090	177173	133507	171627	1	1	1	0	0	0	1	0
Q91W52	1	1	51.17	0.387927	1.22455	PD-L1-KO	wild type	Transmembrane protein 19 OS=Mus musculus GN=Tmem19 PE=2 SV=1 - [TMM19_MOUSE]	39579.7	43297.5	20400.3	42435.7	30756.5	48073	60431.2	39172.3	79293.7	35454.4	23735.3	60534	49667.4	73371.6	60431.2	54876.5	1	0	1	1	1	1	1	1
Q6PA06	1	1	36.65	0.387958	1.31588	wild type	PD-L1-KO	Atlastin-2 OS=Mus musculus GN=Atl2 PE=1 SV=1 - [ATLA2_MOUSE]	9743.05	12143.5	13621.2	26972.4	11098.9	24458.6	7792.52	4131.44	19519.2	9943.75	15847.9	38475.8	17923.2	37330	7792.52	5787.74	0	0	1	0	0	0	0	0
P31786	8	8	389.35	0.388012	1.19493	wild type	PD-L1-KO	Acyl-CoA-binding protein OS=Mus musculus GN=Dbi PE=1 SV=2 - [ACBP_MOUSE]	963612	896109	948467	655027	756463	283089	1.27216e+06	586549	1.93049e+06	733784	1.10352e+06	934387	1.22158e+06	432066	1.27216e+06	821696	5	4	3	3	4	1	3	1
Q8CFI7	7	7	261.59	0.38807	1.24396	PD-L1-KO	wild type	DNA-directed RNA polymerase II subunit RPB2 OS=Mus musculus GN=Polr2b PE=2 SV=2 - [RPB2_MOUSE]	14539.9	18881.6	199232	71297.7	106486	33538.2	103823	134255	29129.1	15461.3	231802	101705	171960	51187.7	103823	188078	1	0	6	2	4	0	2	3
P60670	3	3	144.55	0.388332	1.08091	wild type	PD-L1-KO	Nuclear protein localization protein 4 homolog OS=Mus musculus GN=Nploc4 PE=1 SV=3 - [NPL4_MOUSE]	161592	188386	202070	158146	148716	149085	190221	169010	323733	154261	235103	225594	240156	227542	190221	236765	2	2	3	1	2	1	0	2
O70404	4	4	119.49	0.388433	1.10693	wild type	PD-L1-KO	Vesicle-associated membrane protein 8 OS=Mus musculus GN=Vamp8 PE=1 SV=1 - [VAMP8_MOUSE]	249013	229734	286914	318706	263731	295966	212636	207281	498872	188119	333818	454629	425887	451719	212636	290380	2	2	3	2	2	2	0	0
Q9EP69	14	13	714.8	0.388478	1.13877	wild type	PD-L1-KO	Phosphatidylinositide phosphatase SAC1 OS=Mus musculus GN=Sacm1l PE=2 SV=1 - [SAC1_MOUSE]	376540	411793	463516	521754	479542	416526	415966	245438	754357	337199	539289	744276	774393	635724	415966	343834	1	4	5	4	7	2	4	3
O35129	16	16	791.58	0.388505	1.12835	PD-L1-KO	wild type	Prohibitin-2 OS=Mus musculus GN=Phb2 PE=1 SV=1 - [PHB2_MOUSE]	2.22453e+06	2.18962e+06	2.35174e+06	2.7626e+06	2.60722e+06	3.33538e+06	2.79484e+06	2.01398e+06	4.4566e+06	1.79298e+06	2.73619e+06	3.94081e+06	4.21029e+06	5.09063e+06	2.79484e+06	2.82139e+06	12	5	8	9	9	6	12	9
Q5SUF2	4	4	208.05	0.38857	1.18057	wild type	PD-L1-KO	Luc7-like protein 3 OS=Mus musculus GN=Luc7l3 PE=1 SV=1 - [LC7L3_MOUSE]	241987	238241	239738	163469	229941	152065	263682	102621	484795	195085	278929	233186	371323	232090	263682	143762	2	2	2	1	2	1	2	0
Q9Z2E1	6	4	209.5	0.388906	1.20789	PD-L1-KO	wild type	Methyl-CpG-binding domain protein 2 OS=Mus musculus GN=Mbd2 PE=2 SV=2 - [MBD2_MOUSE]	151052	148154	188822	135719	227306	113240	204873	207998	302616	121317	219690	193601	367067	172833	204873	291384	1	0	2	1	3	1	2	3
Q9DBS9	2	2	111.52	0.388989	1.23655	wild type	PD-L1-KO	Oxysterol-binding protein-related protein 3 OS=Mus musculus GN=Osbpl3 PE=1 SV=2 - [OSBL3_MOUSE]	107204	131653	61884.2	103656	66548.7	136419	75653.4	48416.7	214772	107804	72000.7	147864	107467	208209	75653.4	67826.9	1	1	1	1	0	1	0	0
Q8R1K1	1	1	72.68	0.38925	1.16514	wild type	PD-L1-KO	Ubiquitin-associated domain-containing protein 2 OS=Mus musculus GN=Ubac2 PE=2 SV=1 - [UBAC2_MOUSE]	113248	134558	106279	81022	84891.6	139001	83910.9	65634.2	226880	110183	123653	115577	137088	212151	83910.9	91947	0	0	1	1	1	0	1	1
O89053	53	53	2370.99	0.389508	1.13993	wild type	PD-L1-KO	Coronin-1A OS=Mus musculus GN=Coro1a PE=1 SV=5 - [COR1A_MOUSE]	5.91203e+07	7.08038e+07	5.36974e+07	7.64138e+07	5.44451e+07	7.95777e+07	5.44402e+07	3.96523e+07	1.18441e+08	5.7978e+07	6.24756e+07	1.09003e+08	8.79211e+07	1.21456e+08	5.44402e+07	5.55488e+07	58	52	59	63	52	65	47	41
P97930	1	1	55.6	0.389563	1.29048	wild type	PD-L1-KO	Thymidylate kinase OS=Mus musculus GN=Dtymk PE=2 SV=2 - [KTHY_MOUSE]	40024.7	47961.9	52837	80295	45622.4	55197.1	67847.4	2678.57	80185.3	39273.8	61474.5	114540	73673.6	84244.7	67847.4	3752.41	0	1	0	0	1	0	1	0
Q6ZWX6	6	6	302.86	0.389734	1.09429	wild type	PD-L1-KO	Eukaryotic translation initiation factor 2 subunit 1 OS=Mus musculus GN=Eif2s1 PE=1 SV=3 - [IF2A_MOUSE]	227579	174619	194216	212923	189806	147150	223776	178869	455930	142988	225966	303733	306509	224588	223776	250578	3	3	4	3	5	1	3	3
Q9D6K5	1	1	54.76	0.39031	1.03878	PD-L1-KO	wild type	Synaptojanin-2-binding protein OS=Mus musculus GN=Synj2bp PE=1 SV=1 - [SYJ2B_MOUSE]	48016.2	60097.6	71496.8	6931.95	5515.48	175379	9688.46	3193.39	96195.3	49211.2	83184.7	9888.34	8906.72	267673	9688.46	4473.62	0	0	1	0	0	0	0	0
Q9R0Q3	2	2	102.78	0.390432	1.5461	wild type	PD-L1-KO	Transmembrane emp24 domain-containing protein 2 OS=Mus musculus GN=Tmed2 PE=1 SV=1 - [TMED2_MOUSE]	188439	197895	32042.4	155852	24933.5	160377	167718	18375.5	377517	162048	37280.5	222321	40264.1	244776	167718	25742.2	0	0	2	0	1	0	0	0
P27005	3	3	117.87	0.390648	3.90118	PD-L1-KO	wild type	Protein S100-A8 OS=Mus musculus GN=S100a8 PE=1 SV=3 - [S10A8_MOUSE]	17026	6015.42	16238	1613.54	3793.68	32552.4	116755	6429.33	34109.7	4925.76	18892.5	2301.7	6126.26	49683.3	116755	9006.84	0	0	0	0	0	0	3	0
Q9D8S4	5	5	244.78	0.391295	1.34632	wild type	PD-L1-KO	Oligoribonuclease, mitochondrial OS=Mus musculus GN=Rexo2 PE=1 SV=2 - [ORN_MOUSE]	136912	181314	82804.6	256194	220416	58293.5	145284	64170.2	274288	148470	96341.1	365457	355941	88970.6	145284	89896	2	3	3	0	4	0	3	0
P14152	16	16	900.73	0.391311	1.15204	wild type	PD-L1-KO	Malate dehydrogenase, cytoplasmic OS=Mus musculus GN=Mdh1 PE=1 SV=3 - [MDHC_MOUSE]	5.53523e+06	6.63137e+06	4.51865e+06	6.55693e+06	4.19995e+06	6.38411e+06	6.18566e+06	3.40507e+06	1.10892e+07	5.43013e+06	5.25734e+06	9.35338e+06	6.78232e+06	9.74376e+06	6.18566e+06	4.77016e+06	5	5	7	5	9	3	8	6
Q3UPL0	8	8	275.33	0.393197	1.20121	wild type	PD-L1-KO	Protein transport protein Sec31A OS=Mus musculus GN=Sec31a PE=1 SV=2 - [SC31A_MOUSE]	359770	410961	305281	297477	293013	381902	363359	105147	720760	336518	355187	424348	473175	582878	363359	147300	1	0	4	3	5	2	2	3
P18242	21	21	717.41	0.393324	1.13995	PD-L1-KO	wild type	Cathepsin D OS=Mus musculus GN=Ctsd PE=1 SV=1 - [CATD_MOUSE]	1.01644e+07	1.18625e+07	8.8634e+06	1.39136e+07	1.08606e+07	1.68767e+07	1.21341e+07	1.1203e+07	2.03632e+07	9.71367e+06	1.03123e+07	1.98476e+07	1.75383e+07	2.57582e+07	1.21341e+07	1.56943e+07	7	7	11	9	13	9	10	11
Q9CQ06	2	2	57.81	0.394063	1.21656	PD-L1-KO	wild type	39S ribosomal protein L24, mitochondrial OS=Mus musculus GN=Mrpl24 PE=2 SV=1 - [RM24_MOUSE]	77302.2	102256	68910.5	145093	78746.7	123440	113269	163337	154867	83733.3	80175.7	206973	127165	188400	113269	228819	0	0	1	1	1	0	0	0
O35343	3	3	140.29	0.394076	1.313	wild type	PD-L1-KO	Importin subunit alpha-4 OS=Mus musculus GN=Kpna4 PE=2 SV=1 - [IMA4_MOUSE]	197263	125386	90811.5	71926.3	159589	51476.8	135938	22673.9	395195	102673	105657	102602	257713	78566.7	135938	31763.9	2	1	1	1	2	0	2	0
P55194	4	4	203.24	0.394224	1.09505	PD-L1-KO	wild type	SH3 domain-binding protein 1 OS=Mus musculus GN=Sh3bp1 PE=1 SV=2 - [3BP1_MOUSE]	100299	109364	85323.8	88834.4	125614	109567	96250.8	88871.6	200938	89553	99272.2	126721	202848	167228	96250.8	124500	2	2	1	2	2	1	1	1
Q9CZX8	4	4	107.65	0.394251	1.57494	PD-L1-KO	wild type	40S ribosomal protein S19 OS=Mus musculus GN=Rps19 PE=1 SV=3 - [RS19_MOUSE]	3760.26	7065.56	238248	28166.7	255854	9356.37	42033.8	129392	7533.28	5785.68	277196	40179.4	413168	14280.2	42033.8	181266	0	0	2	0	3	0	0	1
Q5SUC9	1	1	28.34	0.394336	1.63216	PD-L1-KO	wild type	Protein SCO1 homolog, mitochondrial OS=Mus musculus GN=Sco1 PE=2 SV=1 - [SCO1_MOUSE]	557.839	417.998	18225.3	8859.19	21339.7	1038.1	8306.42	15114.6	1117.57	342.28	21204.7	12637.5	34460.5	1584.41	8306.42	21174	0	0	0	0	1	0	0	0
Q9JLZ8	1	1	50.22	0.394416	1.21459	wild type	PD-L1-KO	Single Ig IL-1-related receptor OS=Mus musculus GN=Sigirr PE=1 SV=2 - [SIGIR_MOUSE]	16107	19115.3	16475	16509	16932.2	13526.8	1951.52	23745.5	32268.7	15652.7	19168.3	23549.9	27343.2	20645.3	1951.52	33265	0	0	0	0	0	0	0	1
P35486	11	11	566.87	0.394466	1.3798	wild type	PD-L1-KO	Pyruvate dehydrogenase E1 component subunit alpha, somatic form, mitochondrial OS=Mus musculus GN=Pdha1 PE=1 SV=1 - [ODPA_MOUSE]	1.0829e+06	1.28162e+06	998097	407956	854975	300573	1.0809e+06	496244	2.16947e+06	1.04946e+06	1.16126e+06	581944	1.38066e+06	458750	1.0809e+06	695187	4	3	6	2	6	2	3	4
Q4VA53	3	3	130.08	0.39486	1.35101	PD-L1-KO	wild type	Sister chromatid cohesion protein PDS5 homolog B OS=Mus musculus GN=Pds5b PE=1 SV=1 - [PDS5B_MOUSE]	4622.11	3926.93	44412.6	45303.7	50113.5	10162.5	45965	26516.4	9259.89	3215.58	51673	64625.1	80926.2	15510.5	45965	37146.8	0	0	1	2	1	0	1	0
O70503	5	5	161.11	0.394972	1.17071	wild type	PD-L1-KO	Estradiol 17-beta-dehydrogenase 12 OS=Mus musculus GN=Hsd17b12 PE=2 SV=1 - [DHB12_MOUSE]	229089	180230	256720	150744	184008	118194	197196	198283	458955	147582	298688	215034	297146	180393	197196	277775	1	0	2	0	1	1	1	0
Q91ZR1	3	1	134.63	0.395541	1.30998	wild type	PD-L1-KO	Ras-related protein Rab-4B OS=Mus musculus GN=Rab4b PE=2 SV=2 - [RAB4B_MOUSE]	7482.12	11332.2	28972	20469.5	24864.2	2673.86	21765.8	2800.63	14989.6	9279.4	33708.2	29199.4	40152.1	4080.99	21765.8	3923.4	0	0	1	0	1	0	1	0
Q8K411	8	8	323.69	0.395903	1.25797	PD-L1-KO	wild type	Presequence protease, mitochondrial OS=Mus musculus GN=Pitrm1 PE=2 SV=1 - [PREP_MOUSE]	99561.2	153074	230652	204826	258956	129898	283943	192829	199460	125346	268358	292182	418177	198258	283943	270135	1	0	2	2	5	0	3	4
P50247	14	14	685.5	0.396261	1.17789	wild type	PD-L1-KO	Adenosylhomocysteinase OS=Mus musculus GN=Ahcy PE=1 SV=3 - [SAHH_MOUSE]	605152	645483	824918	521984	725017	306073	755394	418767	1.21236e+06	528557	959771	744603	1.1708e+06	467145	755394	586651	4	4	5	3	6	0	5	4
Q3TXS7	9	9	511.84	0.396411	1.37146	wild type	PD-L1-KO	26S proteasome non-ATPase regulatory subunit 1 OS=Mus musculus GN=Psmd1 PE=1 SV=1 - [PSMD1_MOUSE]	394110	277261	312896	124697	287020	144770	279459	97354	789556	227037	364047	177878	463496	220955	279459	136383	2	3	6	1	4	2	5	2
Q8CH02	1	1	24.68	0.397407	1.21283	PD-L1-KO	wild type	SURP and G-patch domain-containing protein 1 OS=Mus musculus GN=Sugp1 PE=1 SV=1 - [SUGP1_MOUSE]	20455.5	27647.7	20015	40303.9	25978.3	48817.4	26789.1	29912.5	40980.4	22639.5	23287	57493	41951.3	74507.7	26789.1	41904.4	0	0	0	0	0	1	0	0
Q61206	3	3	113.3	0.397806	1.3575	wild type	PD-L1-KO	Platelet-activating factor acetylhydrolase IB subunit beta OS=Mus musculus GN=Pafah1b2 PE=1 SV=2 - [PA1B2_MOUSE]	26455.9	19113.1	31241.6	8470.11	20160	181.588	25881.6	16598.7	53001.6	15650.9	36348.9	12082.5	32555.5	277.149	25881.6	23253.1	2	1	1	0	1	0	0	0
Q9R0P6	7	6	303.13	0.398355	1.32039	PD-L1-KO	wild type	Signal peptidase complex catalytic subunit SEC11A OS=Mus musculus GN=Sec11a PE=2 SV=1 - [SC11A_MOUSE]	48680.6	41092.6	37081.5	2718.54	44811.9	62458.3	24588.2	39228.4	97526.4	33648.9	43143.4	3877.97	72364.9	95327.1	24588.2	54955	3	0	2	1	2	0	2	1
O35704	3	3	152.67	0.398404	1.34138	PD-L1-KO	wild type	Serine palmitoyltransferase 1 OS=Mus musculus GN=Sptlc1 PE=2 SV=2 - [SPTC1_MOUSE]	100732	142695	67340.8	153833	116645	273664	129857	103042	201806	116847	78349.3	219440	188365	417680	129857	144352	1	1	1	1	2	2	1	0
P35979	17	16	1067.45	0.398565	1.16187	wild type	PD-L1-KO	60S ribosomal protein L12 OS=Mus musculus GN=Rpl12 PE=1 SV=2 - [RL12_MOUSE]	5.30997e+06	5.64604e+06	3.81557e+06	3.57055e+06	3.38885e+06	5.35597e+06	4.0182e+06	3.0237e+06	1.0638e+07	4.62329e+06	4.43932e+06	5.09335e+06	5.47252e+06	8.17456e+06	4.0182e+06	4.2359e+06	16	15	12	5	8	14	15	7
Q8BU11	1	1	33.67	0.398686	1.30245	PD-L1-KO	wild type	TOX high mobility group box family member 4 OS=Mus musculus GN=Tox4 PE=1 SV=3 - [TOX4_MOUSE]	29285.7	57370.8	444.891	53627.4	39250.8	77118.7	44391.7	22531.2	58670.7	46978.4	517.62	76498.8	63384.5	117703	44391.7	31563.9	0	1	0	0	0	1	0	0
P19536	5	5	228.37	0.399347	1.09056	PD-L1-KO	wild type	Cytochrome c oxidase subunit 5B, mitochondrial OS=Mus musculus GN=Cox5b PE=1 SV=1 - [COX5B_MOUSE]	1.21613e+06	1.14799e+06	998342	1.05829e+06	1.15537e+06	1.41916e+06	1.26377e+06	982775	2.43639e+06	940039	1.16155e+06	1.50963e+06	1.86577e+06	2.166e+06	1.26377e+06	1.37677e+06	5	8	6	4	7	6	5	6
P62858	11	11	442.71	0.399979	1.25892	wild type	PD-L1-KO	40S ribosomal protein S28 OS=Mus musculus GN=Rps28 PE=2 SV=1 - [RS28_MOUSE]	3.1025e+06	3.38828e+06	1.52193e+06	2.93237e+06	1.30149e+06	2.31172e+06	3.23904e+06	1.84181e+06	6.21553e+06	2.77451e+06	1.77073e+06	4.18299e+06	2.10172e+06	3.52826e+06	3.23904e+06	2.58019e+06	6	4	5	4	4	6	4	3
Q91W39	2	2	72.6	0.400269	1.21473	PD-L1-KO	wild type	Nuclear receptor coactivator 5 OS=Mus musculus GN=Ncoa5 PE=1 SV=1 - [NCOA5_MOUSE]	47090.6	86872.3	46631.9	76747.7	64370.3	55114.5	84581.9	108536	94341	71135.9	54255.1	109480	103949	84118.7	84581.9	152048	0	0	1	1	1	0	1	0
Q8BHN3	47	47	1975.19	0.400376	1.0864	PD-L1-KO	wild type	Neutral alpha-glucosidase AB OS=Mus musculus GN=Ganab PE=1 SV=1 - [GANAB_MOUSE]	2.71054e+06	2.31243e+06	2.81838e+06	2.21675e+06	2.62671e+06	2.96388e+06	3.06515e+06	2.27138e+06	5.43028e+06	1.89355e+06	3.27911e+06	3.16217e+06	4.24176e+06	4.52364e+06	3.06515e+06	3.18198e+06	19	17	27	23	26	23	26	17
Q91XU3	1	1	22.63	0.400415	1.41736	PD-L1-KO	wild type	Phosphatidylinositol 5-phosphate 4-kinase type-2 gamma OS=Mus musculus GN=Pip4k2c PE=2 SV=1 - [PI42C_MOUSE]	1035.21	81.2677	22987.5	3148.5	14117.2	518.156	12374.6	11616.6	2073.92	66.5465	26745.4	4491.29	22797.3	790.838	12374.6	16273.7	0	0	0	0	0	0	0	0
Q9CQI6	15	15	864.29	0.401648	1.18977	wild type	PD-L1-KO	Coactosin-like protein OS=Mus musculus GN=Cotl1 PE=1 SV=3 - [COTL1_MOUSE]	1.54347e+07	1.76178e+07	1.121e+07	1.8044e+07	6.9681e+06	1.70224e+07	2.07386e+07	7.63934e+06	3.09218e+07	1.44265e+07	1.30425e+07	2.57396e+07	1.12525e+07	2.59805e+07	2.07386e+07	1.0702e+07	31	31	25	29	23	30	34	26
Q91XB0	2	2	94.1	0.401669	1.24673	wild type	PD-L1-KO	Three-prime repair exonuclease 1 OS=Mus musculus GN=Trex1 PE=1 SV=2 - [TREX1_MOUSE]	370468	354796	208272	350144	14835.8	397310	363995	253494	742193	290527	242319	499476	23957.6	606396	363995	355120	0	1	1	1	1	1	1	1
Q9Z1J3	3	2	167.93	0.401743	1.25677	wild type	PD-L1-KO	Cysteine desulfurase, mitochondrial OS=Mus musculus GN=Nfs1 PE=2 SV=3 - [NFS1_MOUSE]	55103.6	59546.7	24266.3	32526.4	16562.9	75235.3	29889.1	14728.7	110394	48760.1	28233.3	46398.4	26746.7	114828	29889.1	20633.4	1	1	1	1	1	1	1	1
Q9CQ54	1	1	36.63	0.401829	1.09876	wild type	PD-L1-KO	NADH dehydrogenase [ubiquinone] 1 subunit C2 OS=Mus musculus GN=Ndufc2 PE=1 SV=1 - [NDUC2_MOUSE]	3665.81	3882.79	427.873	44786.6	335.87	0	44737.8	2946.79	7344.06	3179.44	497.82	63887.5	542.382	0	44737.8	4128.16	0	0	0	1	0	0	0	0
Q9D824	10	9	492.02	0.402279	1.13546	wild type	PD-L1-KO	Pre-mRNA 3'-end-processing factor FIP1 OS=Mus musculus GN=Fip1l1 PE=1 SV=1 - [FIP1_MOUSE]	884833	802449	854122	754161	767907	1.00689e+06	724279	403316	1.77267e+06	657089	993750	1.0758e+06	1.24006e+06	1.53678e+06	724279	565005	2	2	5	2	4	2	3	2
Q8C079	1	1	28.56	0.402555	1.16661	wild type	PD-L1-KO	Striatin-interacting protein 1 OS=Mus musculus GN=Strip1 PE=1 SV=2 - [STRP1_MOUSE]	16585.3	22456.8	6646.53	23807	6851.2	95.683	31265.6	21358.1	33226.9	18388.9	7733.07	33960.3	11063.7	146.036	31265.6	29920.6	0	1	0	0	0	0	0	0
Q8BWU5	1	1	45.79	0.4026	1.27681	PD-L1-KO	wild type	Probable tRNA threonylcarbamoyladenosine biosynthesis protein Osgep OS=Mus musculus GN=Osgep PE=2 SV=2 - [OSGEP_MOUSE]	5870.72	16419.4	7229.05	6463.69	8418.53	10819.6	18755.4	7949.64	11761.4	13445.1	8410.83	9220.37	13594.7	16513.4	18755.4	11136.7	0	0	0	0	1	0	0	0
Q9JL35	4	4	109.59	0.40262	1.2386	PD-L1-KO	wild type	High mobility group nucleosome-binding domain-containing protein 5 OS=Mus musculus GN=Hmgn5 PE=1 SV=2 - [HMGN5_MOUSE]	56836.7	56136.4	61029.8	27764.7	80503.5	77936.4	42991.1	48479.2	113866	45967.6	71006.7	39606	130002	118951	42991.1	67914.4	1	0	1	2	2	0	0	0
Q61334	1	1	34.75	0.403148	1.33258	PD-L1-KO	wild type	B-cell receptor-associated protein 29 OS=Mus musculus GN=Bcap29 PE=1 SV=1 - [BAP29_MOUSE]	7295.05	2981.22	9123.22	5409	12820.9	4893.91	9483.42	5861.04	14614.9	2441.19	10614.6	7715.87	20703.9	7469.34	9483.42	8210.73	0	0	0	0	1	0	0	0
P26638	11	11	477.87	0.403284	1.21747	wild type	PD-L1-KO	Serine--tRNA ligase, cytoplasmic OS=Mus musculus GN=Sars PE=2 SV=3 - [SYSC_MOUSE]	476015	423527	539819	288947	425888	526249	303652	163799	953645	346808	628066	412179	687749	803190	303652	229465	5	3	7	3	8	3	3	2
O88559	1	1	60.54	0.40336	1.21068	PD-L1-KO	wild type	Menin OS=Mus musculus GN=Men1 PE=1 SV=2 - [MEN1_MOUSE]	18217.2	22443.1	15285.7	23849.5	23457.2	29415.2	28963.6	14770.5	36496.2	18377.6	17784.5	34021.1	37880.1	44895.1	28963.6	20692.1	1	1	1	1	1	1	1	0
Q8VDJ3	14	14	628.47	0.403498	1.18962	wild type	PD-L1-KO	Vigilin OS=Mus musculus GN=Hdlbp PE=1 SV=1 - [VIGLN_MOUSE]	808639	704531	710579	461960	472526	869204	595311	320579	1.62002e+06	576909	826742	658979	763063	1.32663e+06	595311	449099	5	5	9	4	5	2	4	4
Q62422	10	10	578.36	0.405485	1.14169	wild type	PD-L1-KO	Osteoclast-stimulating factor 1 OS=Mus musculus GN=Ostf1 PE=1 SV=2 - [OSTF1_MOUSE]	1.0996e+06	1.2503e+06	1.37846e+06	907486	787797	786479	1.47114e+06	1.01509e+06	2.20293e+06	1.02381e+06	1.6038e+06	1.29452e+06	1.27218e+06	1.20037e+06	1.47114e+06	1.42204e+06	5	3	6	2	5	1	6	2
Q9D379	2	2	84.93	0.40584	1.31601	wild type	PD-L1-KO	Epoxide hydrolase 1 OS=Mus musculus GN=Ephx1 PE=1 SV=2 - [HYEP_MOUSE]	19816.2	45175.1	43323.3	54187.7	26566.4	41396.9	36689.1	18828.7	39699.6	36991.8	50405.6	77298.1	42901	63182.2	36689.1	26377.1	1	1	2	1	2	1	1	0
Q9Z1G3	1	1	110.39	0.406181	1.63752	wild type	PD-L1-KO	V-type proton ATPase subunit C 1 OS=Mus musculus GN=Atp6v1c1 PE=1 SV=4 - [VATC1_MOUSE]	32210.9	8186.3	36490.1	1888.61	27263.6	13675	0	7168.09	64531	6703.4	42455.3	2694.08	44026.9	20871.6	0	10041.8	0	0	1	0	1	0	0	0
Q3UGC7	2	2	108.93	0.406197	1.46147	PD-L1-KO	wild type	Eukaryotic translation initiation factor 3 subunit J-A OS=Mus musculus GN=Eif3j1 PE=2 SV=1 - [EI3JA_MOUSE]	207.052	1501.75	57117.5	42774.4	40566.6	1957.92	63844.2	42117.4	414.806	1229.71	66454.8	61017.1	65509.3	2988.29	63844.2	59002.2	0	0	2	0	1	0	1	2
P17742	47	47	2811.24	0.40632	1.158	wild type	PD-L1-KO	Peptidyl-prolyl cis-trans isomerase A OS=Mus musculus GN=Ppia PE=1 SV=2 - [PPIA_MOUSE]	8.33151e+07	1.06394e+08	8.5298e+07	1.07714e+08	7.25678e+07	1.13735e+08	1.01491e+08	4.27096e+07	1.66913e+08	8.71216e+07	9.92421e+07	1.53653e+08	1.17187e+08	1.73588e+08	1.01491e+08	5.98319e+07	77	80	80	73	74	59	88	57
P00493	5	5	243.62	0.406398	1.22027	wild type	PD-L1-KO	Hypoxanthine-guanine phosphoribosyltransferase OS=Mus musculus GN=Hprt1 PE=1 SV=3 - [HPRT_MOUSE]	773840	654713	1.03665e+06	493120	784452	654389	609923	375564	1.5503e+06	536115	1.20612e+06	703429	1.26678e+06	998764	609923	526128	2	1	3	3	3	4	1	3
P36552	3	3	72.82	0.406418	1.07237	PD-L1-KO	wild type	Coproporphyrinogen-III oxidase, mitochondrial OS=Mus musculus GN=Cpox PE=1 SV=2 - [HEM6_MOUSE]	6342.87	3591.9	14711.3	495.95	24484.9	2016.05	437.191	23.4313	12707.3	2941.25	17116.3	707.466	39539.7	3077.01	437.191	32.8249	0	0	1	0	2	0	0	0
Q9DCN2	2	2	104.83	0.406988	1.57117	wild type	PD-L1-KO	NADH-cytochrome b5 reductase 3 OS=Mus musculus GN=Cyb5r3 PE=1 SV=3 - [NB5R3_MOUSE]	72594.8	48784.2	129613	26022.2	62891.6	18318.4	57454.5	37646.6	145436	39947.2	150801	37120.4	101561	27958.4	57454.5	52739.1	1	1	2	0	2	0	1	1
P11499	88	66	4115.21	0.407387	1.13638	wild type	PD-L1-KO	Heat shock protein HSP 90-beta OS=Mus musculus GN=Hsp90ab1 PE=1 SV=3 - [HS90B_MOUSE]	2.46279e+07	2.5149e+07	2.02216e+07	2.07113e+07	1.70359e+07	3.53256e+07	1.46882e+07	1.27737e+07	4.93393e+07	2.05934e+07	2.35274e+07	2.95445e+07	2.75105e+07	5.39157e+07	1.46882e+07	1.78946e+07	45	41	37	41	33	65	35	35
O08529	7	7	411.64	0.407484	1.08917	wild type	PD-L1-KO	Calpain-2 catalytic subunit OS=Mus musculus GN=Capn2 PE=2 SV=4 - [CAN2_MOUSE]	480500	438884	458279	414452	523359	407523	408834	305684	962629	359382	533197	591211	845151	621983	408834	428232	2	2	6	4	7	5	4	5
Q91VL8	2	2	74.23	0.407548	1.88866	PD-L1-KO	wild type	Telomeric repeat-binding factor 2-interacting protein 1 OS=Mus musculus GN=Terf2ip PE=1 SV=1 - [TE2IP_MOUSE]	8974.17	14375.6	3374.34	75289.5	65096.6	3895.15	60871.6	62805.3	17978.8	11771.5	3925.96	107399	105122	5944.98	60871.6	87984	0	0	0	1	1	0	1	0
P46467	8	8	238.4	0.407764	1.18975	wild type	PD-L1-KO	Vacuolar protein sorting-associated protein 4B OS=Mus musculus GN=Vps4b PE=1 SV=2 - [VPS4B_MOUSE]	178871	225391	281547	329344	233759	135003	278406	206080	358349	184562	327573	469806	377488	206049	278406	288698	2	0	2	2	2	3	1	2
Q9D1K2	3	3	132.15	0.408152	1.2686	PD-L1-KO	wild type	V-type proton ATPase subunit F OS=Mus musculus GN=Atp6v1f PE=1 SV=2 - [VATF_MOUSE]	8863.28	5553.04	43781.8	3115.1	42125.1	14219.1	10404.2	11033.8	17756.6	4547.14	50939.1	4443.65	68026.1	21701.9	10404.2	15457.3	0	0	0	0	1	0	1	1
Q61316	32	31	1527.43	0.408187	1.11956	wild type	PD-L1-KO	Heat shock 70 kDa protein 4 OS=Mus musculus GN=Hspa4 PE=1 SV=1 - [HSP74_MOUSE]	2.82071e+06	2.99824e+06	2.64436e+06	2.13987e+06	2.77294e+06	2.36935e+06	2.68896e+06	1.63961e+06	5.65098e+06	2.45513e+06	3.07665e+06	3.0525e+06	4.47791e+06	3.61623e+06	2.68896e+06	2.29693e+06	15	9	17	9	18	8	16	14
P59729	1	1	29.88	0.408571	1.20295	PD-L1-KO	wild type	Ras and Rab interactor 3 OS=Mus musculus GN=Rin3 PE=2 SV=2 - [RIN3_MOUSE]	1226.67	1985.66	10496.7	9257.49	10968.7	5797.33	6390.78	4470.81	2457.5	1625.97	12212.7	13205.7	17712.8	8848.2	6390.78	6263.16	0	0	1	1	0	0	0	0
Q60664	2	2	73.58	0.408885	1.24665	wild type	PD-L1-KO	Lymphoid-restricted membrane protein OS=Mus musculus GN=Lrmp PE=1 SV=1 - [LRMP_MOUSE]	103719	110543	60803.3	54815.4	47530	116967	59242.1	40874.6	207790	90518.5	70743.2	78193.4	76754.1	178522	59242.1	57261.1	1	0	1	1	1	1	0	0
O35216	1	1	60.78	0.409751	1.20647	PD-L1-KO	wild type	Histone H3-like centromeric protein A OS=Mus musculus GN=Cenpa PE=2 SV=1 - [CENPA_MOUSE]	8230.58	15315	11412.8	11017.9	19318.4	9234.28	14464.3	12452.1	16489.1	12540.8	13278.6	15716.9	31196.5	14093.9	14464.3	17444.1	0	1	0	0	0	0	0	1
Q9CYZ2	1	1	26.66	0.40993	2.56862	wild type	PD-L1-KO	Tumor protein D54 OS=Mus musculus GN=Tpd52l2 PE=1 SV=1 - [TPD54_MOUSE]	37558	19779.1	491.242	12039.4	497.273	1014.92	21186.5	4501.86	75243.4	16196.2	571.549	17174.1	803.025	1549.02	21186.5	6306.65	1	0	0	0	0	0	0	0
P09925	4	4	147.41	0.410237	2.29409	PD-L1-KO	wild type	Surfeit locus protein 1 OS=Mus musculus GN=Surf1 PE=2 SV=3 - [SURF1_MOUSE]	2637.7	780.097	19838.4	3888.46	39385	11272.3	1148.55	10466.4	5284.34	638.787	23081.4	5546.83	63601.1	17204.3	1148.55	14662.4	0	0	1	0	2	0	0	0
Q8BQZ5	1	1	22.91	0.410824	1.21621	PD-L1-KO	wild type	Cleavage and polyadenylation specificity factor subunit 4 OS=Mus musculus GN=Cpsf4 PE=2 SV=1 - [CPSF4_MOUSE]	9278.44	18495.5	10567.8	10549.3	12793.6	21665.8	14832.4	10170	18588.3	15145.1	12295.4	15048.5	20659.8	33067.6	14832.4	14247.1	0	0	0	0	0	0	0	0
A2A6A1	1	1	20.5	0.412201	2.18542	PD-L1-KO	wild type	G patch domain-containing protein 8 OS=Mus musculus GN=Gpatch8 PE=2 SV=1 - [GPTC8_MOUSE]	189.471	462.998	7472.9	7945.92	16806.7	364.631	9036.77	8914.34	379.585	379.129	8694.54	11334.8	27140.5	556.519	9036.77	12488.1	0	0	0	0	1	0	0	0
P26040	34	16	1486.7	0.412285	1.1399	wild type	PD-L1-KO	Ezrin OS=Mus musculus GN=Ezr PE=1 SV=3 - [EZRI_MOUSE]	4.38973e+06	4.45319e+06	3.2378e+06	4.27789e+06	3.20084e+06	5.52045e+06	3.36046e+06	2.26917e+06	8.79435e+06	3.64652e+06	3.7671e+06	6.10235e+06	5.1689e+06	8.4256e+06	3.36046e+06	3.17888e+06	11	6	9	8	9	8	9	5
Q9CYR0	2	2	129.53	0.412713	1.25811	wild type	PD-L1-KO	Single-stranded DNA-binding protein, mitochondrial OS=Mus musculus GN=Ssbp1 PE=2 SV=1 - [SSBP_MOUSE]	58652.4	100403	69730.5	134452	106571	20025.1	118249	43872.8	117504	82215.6	81129.7	191794	172098	30563.4	118249	61461.4	0	1	1	1	1	0	0	0
Q8C147	14	11	566.18	0.412957	1.18226	wild type	PD-L1-KO	Dedicator of cytokinesis protein 8 OS=Mus musculus GN=Dock8 PE=1 SV=4 - [DOCK8_MOUSE]	565796	429412	573946	310282	445636	312078	455765	376222	1.13351e+06	351627	667772	442613	719639	476311	455765	527050	3	1	7	2	6	1	2	0
P63280	5	5	125.28	0.413037	1.18806	wild type	PD-L1-KO	SUMO-conjugating enzyme UBC9 OS=Mus musculus GN=Ube2i PE=1 SV=1 - [UBC9_MOUSE]	315112	234133	221383	165251	154561	129308	324831	179034	631292	191721	257573	235728	249595	197357	324831	250809	3	2	3	2	2	1	2	1
Q9CWJ9	24	24	1147.43	0.413103	1.13314	wild type	PD-L1-KO	Bifunctional purine biosynthesis protein PURH OS=Mus musculus GN=Atic PE=1 SV=2 - [PUR9_MOUSE]	1.77587e+06	1.52857e+06	1.65474e+06	1.52077e+06	1.33883e+06	1.87222e+06	1.7226e+06	784940	3.55776e+06	1.25167e+06	1.92525e+06	2.16936e+06	2.16202e+06	2.85747e+06	1.7226e+06	1.09962e+06	7	5	15	7	14	5	11	7
Q64311	2	2	170.02	0.413322	1.22018	wild type	PD-L1-KO	Protein N-terminal asparagine amidohydrolase OS=Mus musculus GN=Ntan1 PE=2 SV=3 - [NTAN1_MOUSE]	231420	215862	112159	225352	94146.3	295697	222064	31270.4	463626	176760	130494	321461	152033	451308	222064	43806.7	1	0	2	2	1	2	2	0
Q91Z53	1	1	27.33	0.413551	1.14463	wild type	PD-L1-KO	Glyoxylate reductase/hydroxypyruvate reductase OS=Mus musculus GN=Grhpr PE=1 SV=1 - [GRHPR_MOUSE]	14167.7	14630.4	19754	18173.1	24167.1	11496.3	9517.49	13113.1	28383.5	11980.2	22983.3	25923.7	39026.4	17546.2	9517.49	18370.2	0	0	0	1	0	0	1	0
Q8BGG7	2	1	17	0.413653	1.34266	wild type	PD-L1-KO	Ubiquitin-associated and SH3 domain-containing protein B OS=Mus musculus GN=Ubash3b PE=1 SV=1 - [UBS3B_MOUSE]	8161.59	36213.5	59001.1	13514.9	4782.88	2598.93	64135.2	15542.3	16350.9	29653.6	68646.3	19278.9	7723.67	3966.63	64135.2	21773.2	0	0	1	0	0	0	0	0
Q9WVA2	3	2	197.14	0.413756	1.21813	PD-L1-KO	wild type	Mitochondrial import inner membrane translocase subunit Tim8 A OS=Mus musculus GN=Timm8a1 PE=1 SV=1 - [TIM8A_MOUSE]	51889.9	49630.2	92465.1	42584.7	53109.2	79238.2	53467.3	102359	103956	40639.9	107581	60746.5	85763.9	120938	53467.3	143394	1	1	2	1	1	1	1	0
P14869	13	13	699.37	0.413992	1.15282	wild type	PD-L1-KO	60S acidic ribosomal protein P0 OS=Mus musculus GN=Rplp0 PE=1 SV=3 - [RLA0_MOUSE]	5.87462e+06	5.3681e+06	4.72468e+06	4.04581e+06	4.26154e+06	5.71387e+06	4.98478e+06	2.40011e+06	1.17692e+07	4.3957e+06	5.49705e+06	5.7713e+06	6.88178e+06	8.72081e+06	4.98478e+06	3.36231e+06	14	11	9	5	9	8	9	4
Q9Z179	1	1	82.13	0.414012	1.32486	PD-L1-KO	wild type	SHC SH2 domain-binding protein 1 OS=Mus musculus GN=Shcbp1 PE=1 SV=1 - [SHCBP_MOUSE]	11298.6	16393.9	9863.28	19097.6	12986.3	53145.1	8926.09	0	22635.5	13424.2	11475.7	27242.4	20971	81112.8	8926.09	0	0	0	0	0	0	1	0	0
Q3UM45	4	4	184.75	0.415012	1.39315	wild type	PD-L1-KO	Protein phosphatase 1 regulatory subunit 7 OS=Mus musculus GN=Ppp1r7 PE=1 SV=2 - [PP1R7_MOUSE]	106329	68635.2	191676	62009.1	117782	28050.7	98413.3	63437.6	213019	56202.3	223011	88455.2	190201	42812.4	98413.3	88869.6	0	0	2	0	2	0	1	1
Q8VC03	2	2	124.8	0.415225	1.25477	wild type	PD-L1-KO	Echinoderm microtubule-associated protein-like 3 OS=Mus musculus GN=Eml3 PE=1 SV=1 - [EMAL3_MOUSE]	56741.5	50065.7	27773.7	27554.3	29717.7	39500.8	34214.6	25782.2	113676	40996.6	32314	39305.8	47989.9	60288.3	34214.6	36118.3	1	2	0	0	1	1	0	0
Q6NZN0	4	3	135.36	0.415274	1.33448	wild type	PD-L1-KO	RNA-binding protein 26 OS=Mus musculus GN=Rbm26 PE=1 SV=2 - [RBM26_MOUSE]	33750.2	58887.3	90056.7	37017.6	22918.1	44370.7	56727.8	40625.2	67614.9	48220.2	104779	52805.1	37009.5	67720.9	56727.8	56911.8	0	0	1	0	0	0	1	0
P61759	2	2	90.98	0.415367	1.47475	PD-L1-KO	wild type	Prefoldin subunit 3 OS=Mus musculus GN=Vbp1 PE=2 SV=2 - [PFD3_MOUSE]	78024	97110.6	66231.2	79721.9	201864	145449	64417.5	61793.4	156313	79519.6	77058.4	113722	325982	221992	64417.5	86566.4	1	1	0	0	1	1	0	0
Q61749	1	1	43.91	0.415429	1.19923	wild type	PD-L1-KO	Translation initiation factor eIF-2B subunit delta OS=Mus musculus GN=Eif2b4 PE=2 SV=2 - [EI2BD_MOUSE]	78692.2	53204.2	49741.7	36221.9	47618.6	39095.3	44001.5	50951.7	157651	43566.6	57873.3	51670.1	76897.3	59669.3	44001.5	71378.2	0	0	1	0	1	0	1	0
Q8VI93	1	1	61.69	0.416349	1.18906	wild type	PD-L1-KO	2'-5'-oligoadenylate synthase 3 OS=Mus musculus GN=Oas3 PE=2 SV=1 - [OAS3_MOUSE]	315.463	45.8366	12643.7	873.034	7624.56	1509	1904.19	633.752	631.997	37.5335	14710.7	1245.37	12312.6	2303.11	1904.19	887.823	0	0	1	0	1	0	0	0
Q6PAQ4	1	1	21.53	0.417364	2.44619	PD-L1-KO	wild type	RNA exonuclease 4 OS=Mus musculus GN=Rexo4 PE=2 SV=2 - [REXO4_MOUSE]	542.987	2312.4	2319.32	763.716	4760.05	315.472	4178.64	5272.36	1087.82	1893.52	2698.48	1089.43	7686.8	481.49	4178.64	7386.05	0	0	0	0	0	0	0	0
P54729	5	5	307.52	0.417416	1.10211	wild type	PD-L1-KO	NEDD8 ultimate buster 1 OS=Mus musculus GN=Nub1 PE=1 SV=2 - [NUB1_MOUSE]	156714	202054	164398	218857	170029	188316	180432	134499	313961	165453	191273	312197	274572	287419	180432	188420	4	3	3	2	2	2	4	0
Q3UX61	1	1	22.58	0.417698	1.04758	PD-L1-KO	wild type	N-alpha-acetyltransferase 11 OS=Mus musculus GN=Naa11 PE=2 SV=1 - [NAA11_MOUSE]	48.722	141.947	14920.4	20176	18937.8	1289.05	14584.6	2154.57	97.6092	116.234	17359.5	28780.8	30581.9	1967.41	14584.6	3018.34	0	0	1	1	1	0	0	0
Q8R1V4	3	1	108.95	0.417764	12.7076	PD-L1-KO	wild type	Transmembrane emp24 domain-containing protein 4 OS=Mus musculus GN=Tmed4 PE=2 SV=1 - [TMED4_MOUSE]	6985.55	3003.39	1682.24	6873.46	4389.62	224060	2283.95	4925.11	13994.8	2459.34	1957.25	9804.9	7088.61	341972	2283.95	6899.58	0	0	0	0	0	1	0	0
Q9ESZ8	2	2	94.7	0.417942	1.16154	PD-L1-KO	wild type	General transcription factor II-I OS=Mus musculus GN=Gtf2i PE=1 SV=3 - [GTF2I_MOUSE]	56419.1	72893.3	37547	67801.2	61312.3	92123.4	63604.3	55526.7	113030	59689.1	43685	96717.6	99010.7	140604	63604.3	77787.3	1	0	1	2	2	2	0	0
P52503	6	6	285.11	0.41803	1.11356	PD-L1-KO	wild type	NADH dehydrogenase [ubiquinone] iron-sulfur protein 6, mitochondrial OS=Mus musculus GN=Ndufs6 PE=1 SV=2 - [NDUS6_MOUSE]	176615	247580	327352	228000	238360	269668	326196	256555	353830	202732	380866	325239	384917	411582	326196	359408	2	0	3	3	2	2	4	2
Q922P9	11	11	595.45	0.418063	1.1543	wild type	PD-L1-KO	Putative oxidoreductase GLYR1 OS=Mus musculus GN=Glyr1 PE=2 SV=1 - [GLYR1_MOUSE]	267275	312880	348213	351750	396526	276940	302140	133390	535457	256204	405137	501767	640334	422681	302140	186866	4	3	4	4	4	3	4	1
P68510	21	14	939.39	0.418238	1.30754	wild type	PD-L1-KO	14-3-3 protein eta OS=Mus musculus GN=Ywhah PE=1 SV=2 - [1433F_MOUSE]	2.047e+06	3.51377e+06	2.25091e+06	5.31316e+06	2.18848e+06	2.38402e+06	3.22761e+06	2.2377e+06	4.10093e+06	2.87727e+06	2.61888e+06	7.57916e+06	3.53408e+06	3.63861e+06	3.22761e+06	3.13479e+06	5	5	5	6	5	4	6	5
Q3TWF6	4	4	171.46	0.419571	1.1875	wild type	PD-L1-KO	WD repeat-containing protein 70 OS=Mus musculus GN=Wdr70 PE=1 SV=1 - [WDR70_MOUSE]	79080.3	73514.1	52129.4	47161.6	29834.9	93253.9	71669.2	17355.5	158429	60197.5	60651.3	67275.4	48179.1	142329	71669.2	24313.3	0	0	0	2	1	1	1	1
Q8VEK3	51	51	2635.81	0.420479	1.16	wild type	PD-L1-KO	Heterogeneous nuclear ribonucleoprotein U OS=Mus musculus GN=Hnrnpu PE=1 SV=1 - [HNRPU_MOUSE]	3.32212e+07	4.2677e+07	2.91471e+07	4.31997e+07	3.9671e+07	3.49717e+07	3.54007e+07	1.77537e+07	6.6555e+07	3.49463e+07	3.3912e+07	6.16238e+07	6.40631e+07	5.33757e+07	3.54007e+07	2.48712e+07	41	25	34	31	37	22	30	26
Q3TLH4	6	6	173.63	0.420613	1.21499	PD-L1-KO	wild type	Protein PRRC2C OS=Mus musculus GN=Prrc2c PE=1 SV=3 - [PRC2C_MOUSE]	46633.4	53730.6	73640.9	89064.2	59459.4	118751	79541	61874.2	93425.1	43997.6	85679.3	127049	96018.5	181243	79541	86679.5	0	0	1	1	1	3	0	0
P46460	4	4	286.12	0.420883	1.23074	wild type	PD-L1-KO	Vesicle-fusing ATPase OS=Mus musculus GN=Nsf PE=1 SV=2 - [NSF_MOUSE]	163963	304611	167791	165615	141435	234511	201837	73840.1	328481	249433	195221	236247	228397	357923	201837	103443	1	2	4	3	4	1	3	2
Q8BVG4	1	1	30.16	0.421001	1.50414	wild type	PD-L1-KO	Dipeptidyl peptidase 9 OS=Mus musculus GN=Dpp9 PE=2 SV=2 - [DPP9_MOUSE]	829.619	3436.08	5600.44	4021.47	56.0545	3038.06	3805.48	2333.31	1662.05	2813.65	6515.97	5736.57	90.5201	4636.85	3805.48	3268.73	0	0	0	1	0	0	1	1
Q6P542	9	9	339.37	0.421352	1.25071	PD-L1-KO	wild type	ATP-binding cassette sub-family F member 1 OS=Mus musculus GN=Abcf1 PE=1 SV=1 - [ABCF1_MOUSE]	350999	337971	802452	728527	970977	466455	832246	506832	703189	276749	933634	1.03923e+06	1.56799e+06	711928	832246	710021	3	1	6	2	5	2	1	1
P83940	5	5	234.15	0.421578	1.11122	wild type	PD-L1-KO	Transcription elongation factor B polypeptide 1 OS=Mus musculus GN=Tceb1 PE=1 SV=1 - [ELOC_MOUSE]	206701	204821	168949	141225	169077	140101	195676	144609	414102	167719	196568	201455	273036	213830	195676	202583	0	0	4	1	4	0	0	3
O08795	8	8	319.75	0.421732	1.07167	wild type	PD-L1-KO	Glucosidase 2 subunit beta OS=Mus musculus GN=Prkcsh PE=1 SV=1 - [GLU2B_MOUSE]	528664	564885	457048	555677	422661	582444	506873	453439	1.05912e+06	462559	531765	792666	682537	888957	506873	635223	3	1	3	5	4	3	3	3
Q80UW8	1	1	60.29	0.421899	1.12899	wild type	PD-L1-KO	DNA-directed RNA polymerases I, II, and III subunit RPABC1 OS=Mus musculus GN=Polr2e PE=2 SV=1 - [RPAB1_MOUSE]	57720.8	43570.6	51548.5	37314.3	47969.6	45843.1	44478.6	30137.2	115637	35678	59975.5	53228.4	77464.1	69968.1	44478.6	42219.1	1	1	1	1	1	1	1	1
Q8VCG3	1	1	70.02	0.421971	8.74122	PD-L1-KO	wild type	WD repeat-containing protein 74 OS=Mus musculus GN=Wdr74 PE=2 SV=1 - [WDR74_MOUSE]	362.08	0	1598.86	0	14497.6	2266.5	376.974	0	725.388	0	1860.24	0	23411.5	3459.24	376.974	0	0	0	0	0	1	0	0	0
Q99K48	24	21	1101.35	0.422711	1.0834	wild type	PD-L1-KO	Non-POU domain-containing octamer-binding protein OS=Mus musculus GN=Nono PE=1 SV=3 - [NONO_MOUSE]	3.47635e+06	3.47621e+06	3.24403e+06	3.81902e+06	4.00572e+06	3.1829e+06	3.33215e+06	2.41597e+06	6.96449e+06	2.84652e+06	3.77435e+06	5.44778e+06	6.46867e+06	4.85791e+06	3.33215e+06	3.38453e+06	15	13	15	14	15	16	18	14
Q9CR70	1	1	32.72	0.423224	1.47751	wild type	PD-L1-KO	L antigen family member 3 OS=Mus musculus GN=Lage3 PE=2 SV=1 - [LAGE3_MOUSE]	3031.18	3811.57	1083.06	5012.24	630.517	2619.75	3757.79	1748.62	6072.64	3121.12	1260.11	7149.9	1018.2	3998.41	3757.79	2449.65	0	0	0	1	0	0	0	0
Q9ET26	3	3	94.97	0.423983	2.3273	wild type	PD-L1-KO	RING finger protein 114 OS=Mus musculus GN=Rnf114 PE=2 SV=2 - [RN114_MOUSE]	43575.7	10692	6279.83	4482.33	6758.41	7735.45	5690.92	7757.35	87299.3	8755.19	7306.43	6393.99	10913.9	11806.3	5690.92	10867.3	1	0	2	1	1	0	1	0
P62717	6	6	339.65	0.424013	1.33497	wild type	PD-L1-KO	60S ribosomal protein L18a OS=Mus musculus GN=Rpl18a PE=1 SV=1 - [RL18A_MOUSE]	1.40547e+06	894089	1.52652e+06	538886	1.05331e+06	956110	713236	547065	2.81571e+06	732129	1.77607e+06	768714	1.70095e+06	1.45927e+06	713236	766383	5	2	5	3	5	3	5	2
P28659	5	2	266.11	0.42404	1.16046	wild type	PD-L1-KO	CUGBP Elav-like family member 1 OS=Mus musculus GN=Celf1 PE=1 SV=2 - [CELF1_MOUSE]	94988.3	93096	94397.7	75480.3	91453.2	104801	80189.8	32023.2	190299	76232.1	109829	107672	147684	159953	80189.8	44861.2	2	1	1	1	1	2	1	0
Q8C0V0	1	1	75.56	0.425191	1.21075	PD-L1-KO	wild type	Serine/threonine-protein kinase tousled-like 1 OS=Mus musculus GN=Tlk1 PE=2 SV=2 - [TLK1_MOUSE]	187.876	23731.8	10361.6	18446.9	11612.3	29253.2	12219.2	10755.9	376.39	19432.9	12055.5	26314.3	18752.2	44647.8	12219.2	15067.9	0	0	1	1	1	1	1	0
P54822	1	1	63.67	0.425468	1.44094	wild type	PD-L1-KO	Adenylosuccinate lyase OS=Mus musculus GN=Adsl PE=2 SV=2 - [PUR8_MOUSE]	50533.2	43883.2	26784.3	13541.5	23171.7	16425.3	35287.3	18625.5	101238	35934	31162.8	19316.7	37419	25069.1	35287.3	26092.4	1	1	0	0	0	0	0	0
P32020	6	5	358.53	0.426036	1.21702	wild type	PD-L1-KO	Non-specific lipid-transfer protein OS=Mus musculus GN=Scp2 PE=1 SV=3 - [NLTP_MOUSE]	733575	596730	512923	357211	543520	212678	686608	365252	1.46964e+06	488636	596774	509557	877707	324601	686608	511681	3	3	4	2	3	2	3	1
O08734	2	2	146.28	0.426176	1.25958	wild type	PD-L1-KO	Bcl-2 homologous antagonist/killer OS=Mus musculus GN=Bak1 PE=1 SV=2 - [BAK_MOUSE]	936184	687560	268394	486330	171114	1.12237e+06	409325	185487	1.87554e+06	563012	312270	693743	276324	1.71302e+06	409325	259848	2	1	2	1	1	1	2	1
P10853	57	5	2231.14	0.426802	1.59096	wild type	PD-L1-KO	Histone H2B type 1-F/J/L OS=Mus musculus GN=Hist1h2bf PE=1 SV=2 - [H2B1F_MOUSE]	46301	56850.7	38444.6	6429.37	28894.7	4441.74	52701.1	7004.46	92759	46552.5	44729.4	9171.41	46660.8	6779.22	52701.1	9812.55	0	0	0	0	0	0	0	0
P59708	4	4	194.19	0.426986	1.257	PD-L1-KO	wild type	Pre-mRNA branch site protein p14 OS=Mus musculus GN=Sf3b14 PE=2 SV=1 - [PM14_MOUSE]	299927	373827	258145	476557	232592	486013	503018	548806	600871	306110	300345	679803	375603	741779	503018	768821	2	1	2	2	2	2	2	1
P18608	1	1	44.71	0.427431	1.28754	wild type	PD-L1-KO	Non-histone chromosomal protein HMG-14 OS=Mus musculus GN=Hmgn1 PE=1 SV=2 - [HMGN1_MOUSE]	192036	186341	230582	91605.8	177108	44613.1	189652	132739	384723	152586	268277	130674	286004	68090.9	189652	185954	0	0	0	0	0	0	1	0
Q8R0H9	1	1	36.58	0.427701	1.14721	wild type	PD-L1-KO	ADP-ribosylation factor-binding protein GGA1 OS=Mus musculus GN=Gga1 PE=1 SV=1 - [GGA1_MOUSE]	22141.4	24932.2	15066.5	17624.1	16336.3	24372.9	14019	14800.4	44357.9	20415.8	17529.5	25140.5	26380.8	37199.2	14019	20733.8	0	1	1	1	0	0	1	0
Q9QZ49	1	1	34.33	0.427724	33.5223	PD-L1-KO	wild type	UBX domain-containing protein 8 OS=Mus musculus GN=Ubxn8 PE=1 SV=1 - [UBXN8_MOUSE]	767.117	734.812	654.283	421.813	332.402	486.763	922.75	84679.4	1536.84	601.705	761.242	601.71	536.782	742.924	922.75	118627	0	0	0	0	0	0	0	1
O35691	6	6	197.2	0.428147	1.16691	wild type	PD-L1-KO	Pinin OS=Mus musculus GN=Pnn PE=1 SV=4 - [PININ_MOUSE]	257083	294302	299433	438553	284837	306253	348810	165041	515038	240990	348383	625590	459971	467419	348810	231206	1	2	2	4	4	2	3	3
P58137	7	7	374.22	0.428295	1.12836	wild type	PD-L1-KO	Acyl-coenzyme A thioesterase 8 OS=Mus musculus GN=Acot8 PE=1 SV=1 - [ACOT8_MOUSE]	363753	430212	271306	318224	274549	232967	354891	363710	728739	352282	315658	453942	443357	355567	354891	509521	4	4	4	2	4	2	4	1
Q9WTP6	5	5	311.12	0.429158	1.15381	PD-L1-KO	wild type	Adenylate kinase 2, mitochondrial OS=Mus musculus GN=Ak2 PE=1 SV=5 - [KAD2_MOUSE]	1.01281e+06	1.07712e+06	438846	652515	945610	862300	1.12648e+06	736209	2.02905e+06	882007	510587	930804	1.52703e+06	1.31609e+06	1.12648e+06	1.03135e+06	5	5	3	3	3	3	5	5
P31230	3	3	139.03	0.429227	1.13698	PD-L1-KO	wild type	Aminoacyl tRNA synthase complex-interacting multifunctional protein 1 OS=Mus musculus GN=Aimp1 PE=1 SV=2 - [AIMP1_MOUSE]	266769	164874	269285	283832	298982	338777	269233	212660	534442	135008	313307	404883	482814	517059	269233	297916	1	1	3	1	3	1	0	1
Q9D7J4	3	3	163.01	0.429299	1.16873	PD-L1-KO	wild type	Cytochrome c oxidase protein 20 homolog OS=Mus musculus GN=Cox20 PE=2 SV=1 - [COX20_MOUSE]	80421.4	61318.6	131079	61556.7	128051	69770.7	96093.2	96879.8	161116	50211.1	152507	87809.8	206783	106488	96093.2	135719	1	1	2	1	2	0	1	2
P62242	5	5	256.94	0.429753	1.13993	wild type	PD-L1-KO	40S ribosomal protein S8 OS=Mus musculus GN=Rps8 PE=1 SV=2 - [RS8_MOUSE]	1.77015e+06	1.55199e+06	1.64351e+06	1.16432e+06	1.23465e+06	2.0815e+06	1.16122e+06	900132	3.5463e+06	1.27085e+06	1.91219e+06	1.66089e+06	1.99378e+06	3.17689e+06	1.16122e+06	1.26099e+06	5	2	5	4	7	5	6	4
Q9D1I6	1	1	31.38	0.42999	1.23417	wild type	PD-L1-KO	39S ribosomal protein L14, mitochondrial OS=Mus musculus GN=Mrpl14 PE=2 SV=1 - [RM14_MOUSE]	3082.48	14831.8	8275	13524.5	145.443	14090.9	14214.7	3727.42	6175.42	12145.1	9627.76	19292.5	234.87	21506.3	14214.7	5221.74	1	0	0	0	0	0	0	0
Q9D2R6	1	1	58.46	0.431069	1.24953	PD-L1-KO	wild type	Cytochrome c oxidase assembly protein 3 homolog, mitochondrial OS=Mus musculus GN=Coa3 PE=2 SV=1 - [COA3_MOUSE]	44801.4	60204.9	63145.1	94695	45825.3	90635.4	113151	78824	89754.9	49299.1	73467.7	135081	74001.4	138333	113151	110425	1	1	1	1	1	1	0	0
P16045	24	24	1300.95	0.431101	1.36369	wild type	PD-L1-KO	Galectin-1 OS=Mus musculus GN=Lgals1 PE=1 SV=3 - [LEG1_MOUSE]	1.87654e+07	1.36438e+07	1.68747e+07	5.71422e+06	1.18263e+07	4.89026e+06	1.63509e+07	7.26299e+06	3.75945e+07	1.11723e+07	1.96333e+07	8.15126e+06	1.90977e+07	7.46377e+06	1.63509e+07	1.01747e+07	44	33	53	11	30	17	36	21
Q5SUA5	24	22	1354.62	0.431361	1.1553	PD-L1-KO	wild type	Unconventional myosin-Ig OS=Mus musculus GN=Myo1g PE=2 SV=1 - [MYO1G_MOUSE]	1.62534e+06	1.41264e+06	1.32641e+06	1.10954e+06	1.91917e+06	1.07828e+06	1.83209e+06	1.49449e+06	3.2562e+06	1.15675e+06	1.54325e+06	1.58275e+06	3.09918e+06	1.64573e+06	1.83209e+06	2.09364e+06	10	7	11	4	12	4	10	11
P97493	3	3	151.45	0.431551	1.1528	wild type	PD-L1-KO	Thioredoxin, mitochondrial OS=Mus musculus GN=Txn2 PE=2 SV=1 - [THIOM_MOUSE]	1.1947e+06	1.45167e+06	1.25299e+06	1.3745e+06	1.19294e+06	1.96234e+06	1.34268e+06	76872.5	2.39345e+06	1.18871e+06	1.45782e+06	1.96071e+06	1.92642e+06	2.99502e+06	1.34268e+06	107691	2	2	1	3	2	3	2	0
P70288	6	3	253.46	0.433443	1.13892	wild type	PD-L1-KO	Histone deacetylase 2 OS=Mus musculus GN=Hdac2 PE=1 SV=1 - [HDAC2_MOUSE]	177356	151634	146121	263458	184505	320395	136871	6708.95	355314	124166	170008	375819	297949	489004	136871	9398.56	1	0	1	1	1	1	1	0
Q91XF0	1	1	33.58	0.434272	1.32106	PD-L1-KO	wild type	Pyridoxine-5'-phosphate oxidase OS=Mus musculus GN=Pnpo PE=1 SV=1 - [PNPO_MOUSE]	803.416	96.551	5621.59	6357.22	4139.27	757.873	7038.91	5077.53	1609.56	79.0613	6540.58	9068.5	6684.33	1156.71	7038.91	7113.11	0	0	1	0	0	0	1	0
Q9CRC0	1	1	74.31	0.434715	1.18874	wild type	PD-L1-KO	Vitamin K epoxide reductase complex subunit 1 OS=Mus musculus GN=Vkorc1 PE=2 SV=1 - [VKOR1_MOUSE]	54746.9	47139	39262.5	74587.1	40831.5	54587.9	59937.4	26125.4	109680	38600	45680.9	106398	65937.1	83314.9	59937.4	36599.1	0	1	1	0	1	1	1	0
Q8BJW5	6	5	244.43	0.435281	1.5534	PD-L1-KO	wild type	Nucleolar protein 11 OS=Mus musculus GN=Nol11 PE=2 SV=1 - [NOL11_MOUSE]	21243	33629.8	20285.5	26426.9	64931	45340.9	34745.3	12785.6	42558.2	27538	23601.7	37697.6	104854	69201.6	34745.3	17911.3	0	1	2	1	3	1	1	0
P23116	4	4	172.31	0.43675	1.23788	wild type	PD-L1-KO	Eukaryotic translation initiation factor 3 subunit A OS=Mus musculus GN=Eif3a PE=1 SV=5 - [EIF3A_MOUSE]	285698	243400	124063	259417	311228	111414	203647	110924	572366	199310	144344	370055	502588	170046	203647	155393	3	1	1	1	2	1	1	0
Q80VD1	3	3	190.58	0.436911	1.09857	PD-L1-KO	wild type	Protein FAM98B OS=Mus musculus GN=Fam98b PE=2 SV=1 - [FA98B_MOUSE]	108812	104549	93110.6	132680	102307	139188	136161	104782	217992	85610.2	108332	189267	165211	212436	136161	146789	1	2	3	2	1	1	2	2
Q91Z83	3	3	102.7	0.437083	17.7299	PD-L1-KO	wild type	Myosin-7 OS=Mus musculus GN=Myh7 PE=1 SV=1 - [MYH7_MOUSE]	2952.48	7060.79	3351.31	3155.15	3347.6	3369.33	3029.47	283146	5914.98	5781.76	3899.17	4500.78	5405.89	5142.44	3029.47	396660	0	0	0	0	0	0	0	3
Q9QXK3	5	3	168.47	0.437134	2.61897	wild type	PD-L1-KO	Coatomer subunit gamma-2 OS=Mus musculus GN=Copg2 PE=2 SV=1 - [COPG2_MOUSE]	20881	8323.97	49749.3	145568	32808.4	11661.6	29179.9	12079.1	41832.8	6816.13	57882.1	207651	52981	17798.5	29179.9	16921.6	1	0	2	0	1	0	0	0
Q7TSG2	3	3	130.09	0.437158	1.29136	wild type	PD-L1-KO	RNA polymerase II subunit A C-terminal domain phosphatase OS=Mus musculus GN=Ctdp1 PE=1 SV=1 - [CTDP1_MOUSE]	40487.9	18019.5	50734.8	38431	36178	26754.9	27189.8	24232.2	81113.1	14755.4	59028.7	54821.3	58422.3	40834.7	27189.8	33946.9	1	1	0	1	1	0	0	0
Q61753	20	20	1041.38	0.437469	1.11553	PD-L1-KO	wild type	D-3-phosphoglycerate dehydrogenase OS=Mus musculus GN=Phgdh PE=1 SV=3 - [SERA_MOUSE]	1.98057e+06	1.92362e+06	1.67584e+06	1.53077e+06	1.65818e+06	2.58146e+06	1.6966e+06	1.99606e+06	3.96786e+06	1.57517e+06	1.9498e+06	2.18363e+06	2.67773e+06	3.93996e+06	1.6966e+06	2.79628e+06	5	6	9	5	8	8	7	8
P16675	7	7	411.37	0.437554	1.23442	wild type	PD-L1-KO	Lysosomal protective protein OS=Mus musculus GN=Ctsa PE=1 SV=1 - [PPGB_MOUSE]	317609	327674	429695	176626	330717	198893	264259	220056	636295	268318	499940	251955	534061	303560	264259	308277	3	5	6	1	4	2	3	1
Q9D032	1	1	38.13	0.437696	1.29723	PD-L1-KO	wild type	Single-stranded DNA-binding protein 3 OS=Mus musculus GN=Ssbp3 PE=1 SV=2 - [SSBP3_MOUSE]	4877.15	14420.5	10507.1	2243.88	16658.8	8542.33	5186.63	11186.7	9770.84	11808.3	12224.8	3200.87	26901.6	13037.8	5186.63	15671.5	0	0	0	0	1	0	0	1
Q9DC50	1	1	21.56	0.438394	1.4214	PD-L1-KO	wild type	Peroxisomal carnitine O-octanoyltransferase OS=Mus musculus GN=Crot PE=1 SV=1 - [OCTC_MOUSE]	26399.8	28588.9	4933.59	45593.9	19405	71362.2	37457.8	21756.2	52889.2	23410.2	5740.11	65039.1	31336.3	108917	37457.8	30478.2	0	0	0	0	0	0	1	0
P13439	1	1	30.71	0.438476	1.01026	PD-L1-KO	wild type	Uridine 5'-monophosphate synthase OS=Mus musculus GN=Umps PE=2 SV=3 - [UMPS_MOUSE]	69.2027	401.554	2265.39	0.00137987	291.658	64.278	587.183	1821.1	138.64	328.815	2635.72	0.00196836	470.987	98.1045	587.183	2551.17	0	0	1	0	0	0	0	1
Q9DC48	1	1	40.27	0.438559	1.35537	PD-L1-KO	wild type	Pre-mRNA-processing factor 17 OS=Mus musculus GN=Cdc40 PE=1 SV=1 - [PRP17_MOUSE]	9630.8	9927.15	4455.59	5899.98	6779.2	18809.6	8147.84	6807.37	19294.3	8128.9	5183.97	8416.25	10947.5	28708.2	8147.84	9536.43	0	0	1	1	1	0	0	0
Q9QXH4	2	1	104.04	0.438615	2.11907	PD-L1-KO	wild type	Integrin alpha-X OS=Mus musculus GN=Itgax PE=2 SV=1 - [ITAX_MOUSE]	6149.17	2133.5	11337.1	7734.08	16998.8	1752.86	20320.2	18893	12319.2	1747.03	13190.5	11032.6	27450.7	2675.3	20320.2	26467.2	0	0	1	0	1	0	0	1
P46656	1	1	39.61	0.438622	1.10083	PD-L1-KO	wild type	Adrenodoxin, mitochondrial OS=Mus musculus GN=Fdx1 PE=2 SV=1 - [ADX_MOUSE]	1039.88	1968.51	8192.25	10379.5	7950.17	4631.02	5963.81	5210.95	2083.29	1611.93	9531.48	14806.2	12838.4	7068.1	5963.81	7300.01	0	0	0	1	0	0	0	0
Q9Z103	3	3	102.16	0.43865	1.21057	wild type	PD-L1-KO	Activity-dependent neuroprotector homeobox protein OS=Mus musculus GN=Adnp PE=2 SV=1 - [ADNP_MOUSE]	77361.6	120243	53026.6	93048.5	72838.2	136355	52138.5	22568.2	154986	98461.5	61695.2	132732	117623	208112	52138.5	31615.8	0	0	2	2	0	1	1	1
P85094	3	3	111.7	0.439327	1.25972	PD-L1-KO	wild type	Isochorismatase domain-containing protein 2A, mitochondrial OS=Mus musculus GN=Isoc2a PE=2 SV=1 - [ISC2A_MOUSE]	129440	90864.9	15012.4	2331.8	19982.5	47701.7	144943	86744.9	259319	74405.2	17466.6	3326.28	32268.9	72804.9	144943	121521	2	0	1	0	0	0	1	0
P58854	3	3	99.21	0.439344	1.13508	PD-L1-KO	wild type	Gamma-tubulin complex component 3 OS=Mus musculus GN=Tubgcp3 PE=2 SV=2 - [GCP3_MOUSE]	18168.2	23999.8	26151.6	31817	26417.4	30504.4	35252.8	21488.9	36398	19652.4	30426.7	45386.5	42660.3	46557.4	35252.8	30103.7	1	0	0	2	2	0	1	0
P10711	6	6	299.19	0.439385	1.14574	wild type	PD-L1-KO	Transcription elongation factor A protein 1 OS=Mus musculus GN=Tcea1 PE=1 SV=2 - [TCEA1_MOUSE]	211447	213874	177989	148085	159344	239627	167814	89031.4	423611	175132	207086	211241	257318	365732	167814	124724	2	2	1	4	1	2	2	1
Q99LG4	1	1	21.53	0.439919	1.05985	wild type	PD-L1-KO	Tetratricopeptide repeat protein 5 OS=Mus musculus GN=Ttc5 PE=1 SV=2 - [TTC5_MOUSE]	30054.4	39755.9	39183.3	39640.9	49847.7	58359.8	31675.1	358.748	60210.7	32554.4	45588.8	56547.2	80497	89071.9	31675.1	502.57	0	0	0	1	0	0	0	0
Q0P678	2	2	76.34	0.439961	1.29001	wild type	PD-L1-KO	Zinc finger CCCH domain-containing protein 18 OS=Mus musculus GN=Zc3h18 PE=1 SV=1 - [ZCH18_MOUSE]	75874	125975	88744	46376.9	13603	85027	75941.6	86643.3	152005	103156	103251	66156.1	21966.8	129773	75941.6	121378	0	0	0	1	0	1	1	0
Q8K190	1	1	27.25	0.440724	1.23045	wild type	PD-L1-KO	SAYSvFN domain-containing protein 1 OS=Mus musculus GN=Saysd1 PE=2 SV=1 - [SMDC1_MOUSE]	10236.4	16912.7	9505.27	19112.4	9675.76	18078.8	11634.8	5933.01	20507.6	13849.1	11059.2	27263.6	15625	27592.9	11634.8	8311.55	0	0	0	0	1	1	0	0
Q8R081	34	31	1808.09	0.440731	1.13485	wild type	PD-L1-KO	Heterogeneous nuclear ribonucleoprotein L OS=Mus musculus GN=Hnrnpl PE=1 SV=2 - [HNRPL_MOUSE]	8.78938e+06	8.25544e+06	6.91183e+06	5.91555e+06	9.20108e+06	5.50074e+06	7.30838e+06	4.31243e+06	1.76086e+07	6.76001e+06	8.04175e+06	8.43845e+06	1.48584e+07	8.39551e+06	7.30838e+06	6.04128e+06	20	13	16	19	19	9	16	12
Q8BJ05	5	5	254.48	0.441322	1.1572	wild type	PD-L1-KO	Zinc finger CCCH domain-containing protein 14 OS=Mus musculus GN=Zc3h14 PE=1 SV=1 - [ZC3HE_MOUSE]	97631.9	141554	120868	154102	158912	65461.3	155340	64597.4	195595	115912	140627	219824	256621	99910.6	155340	90494.4	1	1	2	0	2	1	2	0
P42208	10	9	582.64	0.44138	1.1291	wild type	PD-L1-KO	Septin-2 OS=Mus musculus GN=Sept2 PE=1 SV=2 - [SEPT2_MOUSE]	1.2102e+06	1.11489e+06	882710	839443	819354	1.37183e+06	724053	669251	2.42451e+06	912930	1.02701e+06	1.19746e+06	1.32314e+06	2.09376e+06	724053	937553	5	5	6	4	7	4	3	4
P62264	10	10	397.42	0.441405	1.13783	wild type	PD-L1-KO	40S ribosomal protein S14 OS=Mus musculus GN=Rps14 PE=2 SV=3 - [RS14_MOUSE]	2.17341e+06	2.59812e+06	1.70485e+06	2.04179e+06	1.69291e+06	3.03621e+06	1.62782e+06	1.12938e+06	4.3542e+06	2.12749e+06	1.98356e+06	2.91259e+06	2.73382e+06	4.63402e+06	1.62782e+06	1.58215e+06	10	7	7	7	8	10	7	5
O35215	6	4	467.21	0.441585	1.16084	PD-L1-KO	wild type	D-dopachrome decarboxylase OS=Mus musculus GN=Ddt PE=1 SV=3 - [DOPD_MOUSE]	318366	575808	376450	442601	331822	504382	580822	571761	637811	471503	437990	631364	535846	769815	580822	800979	2	1	3	3	4	3	3	1
O70318	1	1	52.36	0.441706	1.15906	wild type	PD-L1-KO	Band 4.1-like protein 2 OS=Mus musculus GN=Epb41l2 PE=1 SV=2 - [E41L2_MOUSE]	33274.7	42881.1	25416.4	44114.1	26220.9	60818	19182.6	19472.4	66662.3	35113.5	29571.3	62928.2	42343	92823.7	19182.6	27278.9	0	1	1	1	1	0	0	0
Q9QYF1	3	3	181.28	0.441884	1.24214	PD-L1-KO	wild type	Retinol dehydrogenase 11 OS=Mus musculus GN=Rdh11 PE=2 SV=2 - [RDH11_MOUSE]	42619.5	69186.8	18066.7	62662.6	69366.1	84680.1	43029.3	42081	85383.6	56654	21020.2	89387.4	112016	129243	43029.3	58951.2	1	1	1	1	1	1	1	1
O35654	3	3	88.36	0.441885	1.61102	PD-L1-KO	wild type	DNA polymerase delta subunit 2 OS=Mus musculus GN=Pold2 PE=2 SV=2 - [DPOD2_MOUSE]	21644.9	15267	25368	10473.8	39861	44706.7	8360.7	24279.1	43363.2	12501.4	29515.1	14940.7	64369.8	68233.8	8360.7	34012.5	0	0	1	1	2	0	0	0
Q9Z2K1	9	6	479.89	0.44211	1.52929	wild type	PD-L1-KO	Keratin, type I cytoskeletal 16 OS=Mus musculus GN=Krt16 PE=1 SV=3 - [K1C16_MOUSE]	624869	241847	404571	117905	231963	151871	106001	418558	1.25186e+06	198037	470709	168190	374588	231794	106001	586357	3	3	3	1	0	2	2	1
Q9CQX4	1	1	42.69	0.44252	1.68118	PD-L1-KO	wild type	PCNA-associated factor OS=Mus musculus GN=Paf PE=2 SV=1 - [PAF15_MOUSE]	402.739	11393	13018.8	19460.5	12730.9	46961.8	8664.11	6077.55	806.844	9329.19	15147.1	27760.2	20558.5	71675.5	8664.11	8514.04	0	0	0	0	1	1	0	0
Q9WVM3	1	1	35.28	0.443134	1.54703	PD-L1-KO	wild type	Anaphase-promoting complex subunit 7 OS=Mus musculus GN=Anapc7 PE=2 SV=3 - [APC7_MOUSE]	9250.64	23014	22357.3	17094.2	27191.1	54381.7	11067.5	18306.7	18532.7	18845.1	26012.1	24384.7	43909.7	83000.3	11067.5	25645.9	0	0	1	0	1	0	0	1
P11032	4	4	165.5	0.443472	1.37163	PD-L1-KO	wild type	Granzyme A OS=Mus musculus GN=Gzma PE=1 SV=2 - [GRAA_MOUSE]	43437.5	57739.8	256910	252182	382400	100064	240280	114317	87022.4	47280.5	298909	359735	617521	152723	240280	160147	0	0	1	0	4	0	2	2
P99029	16	15	775.78	0.44368	1.11008	wild type	PD-L1-KO	Peroxiredoxin-5, mitochondrial OS=Mus musculus GN=Prdx5 PE=1 SV=2 - [PRDX5_MOUSE]	1.51477e+06	1.67283e+06	1.88016e+06	1.66544e+06	1.78504e+06	1.07872e+06	2.11653e+06	1.08521e+06	3.03467e+06	1.3698e+06	2.18752e+06	2.37572e+06	2.88259e+06	1.6464e+06	2.11653e+06	1.52027e+06	10	6	7	8	9	3	11	8
Q02111	2	2	36.1	0.444036	1.22067	wild type	PD-L1-KO	Protein kinase C theta type OS=Mus musculus GN=Prkcq PE=1 SV=1 - [KPCT_MOUSE]	4090.87	6562.09	7195.59	3607.67	5718.58	2698.39	4127.82	5032.66	8195.62	5373.41	8371.89	5146.3	9234.69	4118.42	4127.82	7050.25	0	0	1	0	1	0	0	0
Q8R3Q0	2	2	83.54	0.444055	1.17956	PD-L1-KO	wild type	Store-operated calcium entry-associated regulatory factor OS=Mus musculus GN=Tmem66 PE=2 SV=2 - [SARAF_MOUSE]	13549.9	16697.4	26925.4	30668.4	32649.8	23036.8	29958	17968.8	27145.7	13672.8	31327	43748.1	52724.8	35160	29958	25172.5	0	0	1	1	2	1	1	1
Q9DC71	1	1	17.13	0.444731	1.597	PD-L1-KO	wild type	28S ribosomal protein S15, mitochondrial OS=Mus musculus GN=Mrps15 PE=2 SV=2 - [RT15_MOUSE]	12076.3	12929.1	10335.5	9030.86	9244.34	39025.5	9730.2	12861.5	24193.6	10587	12025.1	12882.4	14928.3	59562.7	9730.2	18017.7	0	0	0	0	1	0	0	0
Q9R0B7	1	1	37.32	0.444951	1.06308	PD-L1-KO	wild type	Zinc finger protein 346 OS=Mus musculus GN=Znf346 PE=1 SV=1 - [ZN346_MOUSE]	5179.54	11377.9	0	11411.3	2400.16	11938.1	12106.6	3288.1	10376.6	9316.86	0	16278.1	3875.92	18220.6	12106.6	4606.29	0	0	0	1	0	0	0	0
P42225	16	16	917.67	0.445763	1.11989	wild type	PD-L1-KO	Signal transducer and activator of transcription 1 OS=Mus musculus GN=Stat1 PE=1 SV=1 - [STAT1_MOUSE]	1.48088e+06	1.2452e+06	1.06996e+06	1.08832e+06	796234	2.16723e+06	827293	570714	2.96677e+06	1.01964e+06	1.24487e+06	1.55247e+06	1.2858e+06	3.30775e+06	827293	799512	8	6	8	5	7	6	2	3
Q80X90	14	13	638.56	0.445813	1.16931	wild type	PD-L1-KO	Filamin-B OS=Mus musculus GN=Flnb PE=1 SV=3 - [FLNB_MOUSE]	403918	462194	432654	248998	251737	430474	280892	360548	809206	378470	503383	355192	406519	657012	280892	505092	6	2	8	4	4	2	6	2
O70551	2	2	135.2	0.446644	1.21792	wild type	PD-L1-KO	SRSF protein kinase 1 OS=Mus musculus GN=Srpk1 PE=1 SV=2 - [SRPK1_MOUSE]	33393.2	24847.2	15866.8	17003.4	20700	13068.7	20142.2	20897.6	66899.7	20346.3	18460.6	24255.1	33427.6	19946.2	20142.2	29275.4	0	1	2	0	1	0	1	1
P97371	11	11	646.59	0.446728	1.17064	wild type	PD-L1-KO	Proteasome activator complex subunit 1 OS=Mus musculus GN=Psme1 PE=2 SV=2 - [PSME1_MOUSE]	2.0239e+06	1.58953e+06	2.06194e+06	1.20287e+06	1.82675e+06	854599	1.91897e+06	1.27528e+06	4.05466e+06	1.30159e+06	2.39901e+06	1.71588e+06	2.94995e+06	1.30433e+06	1.91897e+06	1.78653e+06	9	5	9	4	6	3	11	7
Q9DBG7	4	4	191.24	0.447134	1.16112	wild type	PD-L1-KO	Signal recognition particle receptor subunit alpha OS=Mus musculus GN=Srpr PE=1 SV=1 - [SRPR_MOUSE]	76342.5	60486.2	68720.2	57069.4	53476	16665.8	82463.6	73570.8	152944	49529.5	79954.3	81408.7	86356.2	25436.2	82463.6	103065	0	1	2	0	3	0	0	1
Q60520	5	5	162.15	0.447816	1.23621	wild type	PD-L1-KO	Paired amphipathic helix protein Sin3a OS=Mus musculus GN=Sin3a PE=1 SV=3 - [SIN3A_MOUSE]	208610	214864	92630	175930	106322	111621	235008	106854	417929	175943	107773	250963	171695	170362	235008	149691	2	0	1	1	3	0	1	1
P62137	9	3	262.46	0.448032	1.24184	wild type	PD-L1-KO	Serine/threonine-protein phosphatase PP1-alpha catalytic subunit OS=Mus musculus GN=Ppp1ca PE=1 SV=1 - [PP1A_MOUSE]	244433	246955	160141	107629	120806	264671	93965.7	131874	489696	202221	186320	153532	195085	403954	93965.7	184742	2	1	1	0	0	1	1	0
Q61490	2	2	59.71	0.448257	1.46765	PD-L1-KO	wild type	CD166 antigen OS=Mus musculus GN=Alcam PE=1 SV=3 - [CD166_MOUSE]	2810.25	5070.74	6174.87	4098.04	7691.47	11411.8	2667.21	4873.06	5630.04	4152.2	7184.31	5845.81	12420.6	17417.2	2667.21	6826.67	0	0	0	0	1	1	0	0
Q9WTP7	5	5	304.38	0.448265	1.20443	wild type	PD-L1-KO	GTP:AMP phosphotransferase AK3, mitochondrial OS=Mus musculus GN=Ak3 PE=1 SV=3 - [KAD3_MOUSE]	473831	419446	369654	223709	350248	200223	398068	285775	949270	343465	430083	319118	565600	305592	398068	400342	1	3	4	4	4	2	3	4
Q99LE6	1	1	79.7	0.449025	1.15787	wild type	PD-L1-KO	ATP-binding cassette sub-family F member 2 OS=Mus musculus GN=Abcf2 PE=2 SV=1 - [ABCF2_MOUSE]	52710.7	45291.7	25750.7	27525.2	17652.3	73289.9	30208.7	9501.13	105600	37087.4	29960.3	39264.3	28506	111859	30208.7	13310.1	1	1	1	0	0	0	0	0
Q9D8C4	6	6	238.56	0.449262	1.10557	wild type	PD-L1-KO	Interferon-induced 35 kDa protein homolog OS=Mus musculus GN=Ifi35 PE=2 SV=3 - [IN35_MOUSE]	712269	820748	552949	659394	558209	791110	642843	491045	1.42695e+06	672074	643343	940616	901428	1.20743e+06	642843	687904	4	3	4	3	3	3	4	3
Q9D8Y7	2	2	120.56	0.44981	1.12836	wild type	PD-L1-KO	Tumor necrosis factor alpha-induced protein 8-like protein 2 OS=Mus musculus GN=Tnfaip8l2 PE=1 SV=1 - [TP8L2_MOUSE]	75629	50519.5	102911	42172.6	1327.57	61014.5	59360.6	118674	151515	41368.2	119735	60158.7	2143.83	93123.5	59360.6	166251	2	1	1	0	1	0	0	0
Q8CIL4	1	1	46.02	0.450153	1.00839	PD-L1-KO	wild type	Uncharacterized protein C1orf131 homolog OS=Mus musculus PE=2 SV=1 - [CA131_MOUSE]	2430.31	7062.34	2757.19	11715.5	7.33785	6634.78	2499.06	15025.2	4868.86	5783.04	3207.92	16712	11.8496	10126.4	2499.06	21048.8	0	0	0	1	0	0	1	0
P24369	18	17	841.72	0.450293	1.15847	wild type	PD-L1-KO	Peptidyl-prolyl cis-trans isomerase B OS=Mus musculus GN=Ppib PE=2 SV=2 - [PPIB_MOUSE]	1.78467e+06	1.60275e+06	1.81557e+06	1.02071e+06	1.44923e+06	1.006e+06	1.64612e+06	1.27101e+06	3.5754e+06	1.31242e+06	2.11237e+06	1.45603e+06	2.34029e+06	1.5354e+06	1.64612e+06	1.78056e+06	7	8	13	6	9	2	8	10
Q8VDL4	1	1	29.14	0.450583	1.17997	wild type	PD-L1-KO	ADP-dependent glucokinase OS=Mus musculus GN=Adpgk PE=1 SV=2 - [ADPGK_MOUSE]	20515.4	21534.3	11922.1	19169.7	10619.4	22002.1	21125	8239.55	41100.3	17633.5	13871.1	27345.3	17148.8	33580.8	21125	11542.8	0	0	0	1	0	0	0	0
Q64324	1	1	19.41	0.450596	1.19365	PD-L1-KO	wild type	Syntaxin-binding protein 2 OS=Mus musculus GN=Stxbp2 PE=2 SV=1 - [STXB2_MOUSE]	12259.7	2493.1	24007.2	651.643	30899	15770.9	0	373.517	24560.9	2041.49	27931.7	929.56	49897.5	24070.5	0	523.259	0	0	1	0	0	0	0	0
P63044	3	2	170.35	0.452324	1.56835	PD-L1-KO	wild type	Vesicle-associated membrane protein 2 OS=Mus musculus GN=Vamp2 PE=1 SV=2 - [VAMP2_MOUSE]	1608.58	7262.83	18665.1	21544.1	19446.1	34130.7	4098	19300.9	3222.62	5947.21	21716.4	30732.4	31402.7	52092.1	4098	27038.7	0	0	0	0	0	2	0	1
Q9R1T4	18	13	946.26	0.452395	1.14837	wild type	PD-L1-KO	Septin-6 OS=Mus musculus GN=Sept6 PE=1 SV=4 - [SEPT6_MOUSE]	1.56229e+06	1.75091e+06	1.24974e+06	1.11042e+06	1.88301e+06	818236	1.45161e+06	787492	3.12989e+06	1.43374e+06	1.45404e+06	1.584e+06	3.04079e+06	1.24884e+06	1.45161e+06	1.1032e+06	7	5	6	6	10	4	6	4
Q8VBV3	3	3	176.21	0.452455	1.17789	wild type	PD-L1-KO	Exosome complex component RRP4 OS=Mus musculus GN=Exosc2 PE=2 SV=1 - [EXOS2_MOUSE]	318287	312040	317314	449352	352590	407712	363545	62163.9	637654	255516	369187	640994	569382	622271	363545	87085.4	0	0	3	1	3	1	2	1
O09061	13	11	682.97	0.452918	1.16209	wild type	PD-L1-KO	Proteasome subunit beta type-1 OS=Mus musculus GN=Psmb1 PE=1 SV=1 - [PSB1_MOUSE]	790586	844266	683899	488104	580066	344921	929693	560675	1.58385e+06	691332	795700	696274	936725	526437	929693	785450	3	2	5	1	5	0	6	4
Q8R123	1	1	18.83	0.452955	1.1516	wild type	PD-L1-KO	FAD synthase OS=Mus musculus GN=Flad1 PE=1 SV=1 - [FAD1_MOUSE]	15384.2	17817	11487.7	12536.1	9764.37	19925	13954.1	6048.27	30820.6	14589.6	13365.6	17882.6	15768.1	30410.5	13954.1	8473.02	0	0	1	0	1	0	0	0
P14901	1	1	47.6	0.45309	1.51547	PD-L1-KO	wild type	Heme oxygenase 1 OS=Mus musculus GN=Hmox1 PE=1 SV=1 - [HMOX1_MOUSE]	3986.6	63.4501	7938.84	16295.9	5721.17	1492.02	18585.8	17065.8	7986.73	51.9565	9236.65	23245.9	9238.88	2277.2	18585.8	23907.5	0	0	0	1	1	0	1	1
Q9EQQ9	1	1	26.12	0.453313	2.7351	wild type	PD-L1-KO	Bifunctional protein NCOAT OS=Mus musculus GN=Mgea5 PE=1 SV=2 - [NCOAT_MOUSE]	13017.4	14637.5	6095.96	757.294	3432.16	3239.96	2593.59	3351.07	26078.9	11986	7092.5	1080.27	5542.45	4944.99	2593.59	4694.51	0	0	0	0	1	0	0	0
Q91WD5	4	4	159.09	0.453703	1.11322	wild type	PD-L1-KO	NADH dehydrogenase [ubiquinone] iron-sulfur protein 2, mitochondrial OS=Mus musculus GN=Ndufs2 PE=1 SV=1 - [NDUS2_MOUSE]	172979	131276	126460	104520	143580	111351	111365	114503	346544	107496	147133	149096	231861	169949	111365	160408	1	1	1	2	3	1	0	2
Q9D6T0	3	3	95.61	0.454244	1.27987	wild type	PD-L1-KO	Nitric oxide synthase-interacting protein OS=Mus musculus GN=Nosip PE=2 SV=1 - [NOSIP_MOUSE]	55681.1	141119	92189.5	142494	98450.1	73666.1	87798.8	77215.3	111551	115556	107260	203265	158983	112433	87798.8	108171	1	0	2	1	2	1	1	1
Q01965	7	7	377.82	0.454365	1.12006	wild type	PD-L1-KO	T-lymphocyte surface antigen Ly-9 OS=Mus musculus GN=Ly9 PE=1 SV=2 - [LY9_MOUSE]	511730	465971	541342	457047	430054	816591	351160	166462	1.0252e+06	381563	629838	651972	694476	1.24632e+06	351160	233197	2	3	5	2	4	3	4	2
Q9CQJ8	4	4	107.36	0.454467	1.08165	PD-L1-KO	wild type	NADH dehydrogenase [ubiquinone] 1 beta subcomplex subunit 9 OS=Mus musculus GN=Ndufb9 PE=1 SV=3 - [NDUB9_MOUSE]	358817	431510	372450	567245	453083	468665	529955	419575	718851	353345	433336	809168	731665	715302	529955	587782	1	0	2	1	1	2	1	2
Q9CSU0	4	4	261.61	0.454477	1.10288	PD-L1-KO	wild type	Regulation of nuclear pre-mRNA domain-containing protein 1B OS=Mus musculus GN=Rprd1b PE=1 SV=2 - [RPR1B_MOUSE]	526660	585293	312938	490628	492410	530349	614733	475103	1.05511e+06	479271	364095	699874	795173	809446	614733	665571	3	2	2	2	3	1	3	2
P54728	2	2	57.85	0.454538	1.24533	wild type	PD-L1-KO	UV excision repair protein RAD23 homolog B OS=Mus musculus GN=Rad23b PE=1 SV=2 - [RD23B_MOUSE]	147131	169359	183283	66893.1	162775	47477.5	196934	47845.6	294761	138680	213245	95422.1	262859	72462.6	196934	67026.9	0	0	1	0	2	0	0	0
Q9ER39	1	1	37.8	0.455546	1.23114	PD-L1-KO	wild type	Torsin-1A OS=Mus musculus GN=Tor1a PE=1 SV=1 - [TOR1A_MOUSE]	23566.4	34971.7	27393.1	23342	17997.4	41990.5	38136.3	36406.9	47212.8	28636.8	31871.2	33297	29063.2	64088.1	38136.3	51002.5	0	1	0	1	1	0	1	0
P08249	49	49	2629.07	0.455745	1.11274	wild type	PD-L1-KO	Malate dehydrogenase, mitochondrial OS=Mus musculus GN=Mdh2 PE=1 SV=3 - [MDHM_MOUSE]	2.5661e+07	3.2946e+07	2.25311e+07	2.12689e+07	2.38661e+07	2.34141e+07	2.67515e+07	1.79992e+07	5.1409e+07	2.6978e+07	2.62144e+07	3.03397e+07	3.85403e+07	3.57358e+07	2.67515e+07	2.52151e+07	49	51	51	38	48	38	52	33
Q9QUR6	13	13	677.95	0.455982	1.09672	wild type	PD-L1-KO	Prolyl endopeptidase OS=Mus musculus GN=Prep PE=2 SV=1 - [PPCE_MOUSE]	1.21813e+06	1.42294e+06	1.09661e+06	1.16992e+06	869607	1.55615e+06	1.14668e+06	902351	2.4404e+06	1.16518e+06	1.27588e+06	1.66887e+06	1.40429e+06	2.37508e+06	1.14668e+06	1.2641e+06	5	6	8	2	3	4	6	3
P63017	67	58	4108.01	0.456112	1.13263	wild type	PD-L1-KO	Heat shock cognate 71 kDa protein OS=Mus musculus GN=Hspa8 PE=1 SV=1 - [HSP7C_MOUSE]	3.41573e+07	4.02765e+07	2.78354e+07	3.84644e+07	2.64001e+07	4.78677e+07	3.24841e+07	1.75016e+07	6.84305e+07	3.29807e+07	3.23859e+07	5.4869e+07	4.26324e+07	7.30582e+07	3.24841e+07	2.4518e+07	72	68	64	54	50	79	68	37
Q69ZF8	1	1	45.15	0.456341	2.43845	wild type	PD-L1-KO	E3 ubiquitin-protein ligase MSL2 OS=Mus musculus GN=Msl2 PE=2 SV=2 - [MSL2_MOUSE]	37.8436	256.115	3847.22	140.603	1423.39	0	48.3701	284.179	75.8156	209.721	4476.14	200.568	2298.58	0	48.3701	398.106	0	0	1	0	1	0	0	0
P49722	14	14	874.21	0.456525	1.12189	wild type	PD-L1-KO	Proteasome subunit alpha type-2 OS=Mus musculus GN=Psma2 PE=1 SV=3 - [PSA2_MOUSE]	2.19653e+06	2.12147e+06	2.2521e+06	2.48925e+06	2.08437e+06	2.77301e+06	2.21558e+06	1.00211e+06	4.40051e+06	1.73718e+06	2.62026e+06	3.55088e+06	3.36596e+06	4.23231e+06	2.21558e+06	1.40385e+06	5	9	7	6	7	7	9	2
Q8C7V3	1	1	30.36	0.456542	2.78858	wild type	PD-L1-KO	U3 small nucleolar RNA-associated protein 15 homolog OS=Mus musculus GN=Utp15 PE=2 SV=1 - [UTP15_MOUSE]	12298.1	16878.4	1447.44	1111.93	5113.21	3921.77	711.312	1634.38	24638	13821	1684.06	1586.16	8257.1	5985.62	711.312	2289.6	0	0	0	0	0	0	0	0
Q9D0M1	4	2	217.08	0.457037	1.59971	wild type	PD-L1-KO	Phosphoribosyl pyrophosphate synthase-associated protein 1 OS=Mus musculus GN=Prpsap1 PE=1 SV=1 - [KPRA_MOUSE]	11966.6	3397.65	9596.11	1945.35	5519.45	3079.78	7573.92	645.981	23973.8	2782.19	11164.8	2775.02	8913.13	4700.53	7573.92	904.954	0	0	1	0	0	0	1	0
Q9QX11	5	4	216.94	0.457064	1.17604	wild type	PD-L1-KO	Cytohesin-1 OS=Mus musculus GN=Cyth1 PE=2 SV=2 - [CYH1_MOUSE]	99517	116408	148637	72576.9	114300	73434.3	103881	80088.9	199372	95321	172936	103530	184578	112079	103881	112196	1	0	2	1	3	1	1	0
P09411	25	25	1140.7	0.457691	1.09739	wild type	PD-L1-KO	Phosphoglycerate kinase 1 OS=Mus musculus GN=Pgk1 PE=1 SV=4 - [PGK1_MOUSE]	3.36515e+06	3.46039e+06	3.48357e+06	2.7549e+06	2.87807e+06	3.52141e+06	3.48615e+06	2.01899e+06	6.74172e+06	2.83356e+06	4.05305e+06	3.92983e+06	4.64768e+06	5.37456e+06	3.48615e+06	2.8284e+06	8	6	12	10	17	5	12	7
Q8BI84	2	2	80.68	0.457943	1.11111	PD-L1-KO	wild type	Melanoma inhibitory activity protein 3 OS=Mus musculus GN=Mia3 PE=1 SV=2 - [MIA3_MOUSE]	59958.7	76566.5	34722.6	42794.9	53541.8	57566.4	69676.2	57040.4	120121	62696.9	40398.9	61046.4	86462.5	87860.9	69676.2	79907.9	0	0	0	0	1	2	1	0
Q9D1A2	17	16	754.81	0.458137	1.1536	wild type	PD-L1-KO	Cytosolic non-specific dipeptidase OS=Mus musculus GN=Cndp2 PE=1 SV=1 - [CNDP2_MOUSE]	2.14131e+06	2.59901e+06	1.5152e+06	1.92709e+06	1.40026e+06	2.48979e+06	2.16312e+06	1.03993e+06	4.28989e+06	2.12821e+06	1.76289e+06	2.74897e+06	2.26122e+06	3.80005e+06	2.16312e+06	1.45684e+06	6	4	8	3	7	3	6	2
Q9CXG3	4	4	137.73	0.458314	1.13204	PD-L1-KO	wild type	Peptidyl-prolyl cis-trans isomerase-like 4 OS=Mus musculus GN=Ppil4 PE=2 SV=2 - [PPIL4_MOUSE]	82606.6	90261	83728.1	140222	113446	147765	90612.6	97392.1	165493	73910.7	97415.6	200025	183199	225527	90612.6	136437	0	1	3	1	3	2	1	0
O35857	1	1	41.13	0.458601	1.22703	PD-L1-KO	wild type	Mitochondrial import inner membrane translocase subunit TIM44 OS=Mus musculus GN=Timm44 PE=2 SV=2 - [TIM44_MOUSE]	19120.5	23234.1	2527.59	18845.9	15849.1	12459.3	22402.2	27485.5	38305.8	19025.4	2940.78	26883.5	25594	19016	22402.2	38504.5	0	0	1	0	1	0	1	0
Q62426	6	6	208.4	0.45878	1.19149	PD-L1-KO	wild type	Cystatin-B OS=Mus musculus GN=Cstb PE=1 SV=1 - [CYTB_MOUSE]	112865	151549	125483	118939	194641	101797	191663	118172	226112	124097	145996	169665	314317	155367	191663	165547	1	1	1	2	3	2	2	2
Q62178	3	3	155.03	0.458887	1.17866	wild type	PD-L1-KO	Semaphorin-4A OS=Mus musculus GN=Sema4a PE=1 SV=2 - [SEM4A_MOUSE]	124048	91103.1	102474	63052.5	31835.7	133776	102551	54811.5	248517	74600.3	119226	89943.6	51410.1	204176	102551	76785.4	1	1	2	0	0	0	1	0
P10107	1	1	63.35	0.459023	1.54287	wild type	PD-L1-KO	Annexin A1 OS=Mus musculus GN=Anxa1 PE=1 SV=2 - [ANXA1_MOUSE]	1773.88	2845.64	9546.99	26082	19713.3	474.585	4790.66	1108.17	3553.78	2330.17	11107.7	37205.6	31834.1	724.337	4790.66	1552.43	0	0	0	0	1	0	0	0
Q80X73	2	2	68.19	0.459195	1.21092	PD-L1-KO	wild type	Protein pelota homolog OS=Mus musculus GN=Pelo PE=2 SV=3 - [PELO_MOUSE]	29222	46511.5	23832.7	39776.8	45351.4	59832	37230.9	26319.5	58543.2	38086.2	27728.7	56741.1	73236.1	91318.8	37230.9	36871	0	2	0	1	0	1	0	0
Q99MK8	10	9	501.4	0.459267	1.09183	wild type	PD-L1-KO	Beta-adrenergic receptor kinase 1 OS=Mus musculus GN=Adrbk1 PE=2 SV=2 - [ARBK1_MOUSE]	1.09454e+06	890797	895382	963218	653064	1.16216e+06	736743	968681	2.19279e+06	729434	1.04175e+06	1.37402e+06	1.05461e+06	1.77374e+06	736743	1.35702e+06	4	3	3	3	3	3	6	3
P01851	1	1	54.26	0.459434	1.3935	PD-L1-KO	wild type	T-cell receptor beta-2 chain C region OS=Mus musculus PE=1 SV=1 - [TCB2_MOUSE]	84.8093	133.962	3242.88	1367.66	2852.8	164.457	1864.83	1847.58	169.906	109.696	3773.02	1950.95	4606.87	251.003	1864.83	2588.27	0	0	1	0	1	0	1	1
Q9DCT5	3	3	144.87	0.459527	1.0344	wild type	PD-L1-KO	Stromal cell-derived factor 2 OS=Mus musculus GN=Sdf2 PE=2 SV=1 - [SDF2_MOUSE]	44588.9	56000.5	39103	59401.7	46667.4	106409	37508.1	1888.57	89329.1	45856.3	45495.4	84735.8	75361.2	162407	37508.1	2645.7	0	0	0	1	1	0	1	0
P04370	2	2	120.38	0.45957	1.41309	wild type	PD-L1-KO	Myelin basic protein OS=Mus musculus GN=Mbp PE=1 SV=2 - [MBP_MOUSE]	172197	163293	45527.7	70066.8	163542	61219.1	44512.4	49943.7	344978	133713	52970.3	99949.3	264097	93435.9	44512.4	69966.2	0	1	0	0	1	1	0	1
P47811	3	3	99.31	0.460131	1.1336	wild type	PD-L1-KO	Mitogen-activated protein kinase 14 OS=Mus musculus GN=Mapk14 PE=1 SV=3 - [MK14_MOUSE]	55014.4	53992.5	34336	52430.1	23173.7	84424	39745.8	25356.6	110215	44212.1	39949.1	74790.9	37422.3	128852	39745.8	35522	2	2	1	2	0	1	2	2
Q99KG3	5	4	261.27	0.460383	1.29003	wild type	PD-L1-KO	RNA-binding protein 10 OS=Mus musculus GN=Rbm10 PE=1 SV=1 - [RBM10_MOUSE]	88222.7	154644	46714.7	102783	82060.3	94721.8	117246	10123.9	176745	126631	54351.4	146618	132516	144569	117246	14182.6	1	1	1	0	2	1	2	0
Q9WTX5	3	3	207.71	0.460438	1.15285	wild type	PD-L1-KO	S-phase kinase-associated protein 1 OS=Mus musculus GN=Skp1 PE=1 SV=3 - [SKP1_MOUSE]	895580	1.37088e+06	677125	1.07626e+06	565003	1.66801e+06	1.08072e+06	173129	1.7942e+06	1.12255e+06	787818	1.53527e+06	912400	2.5458e+06	1.08072e+06	242536	4	2	2	1	1	2	1	1
Q3UYV9	2	2	84.48	0.460524	1.16289	wild type	PD-L1-KO	Nuclear cap-binding protein subunit 1 OS=Mus musculus GN=Ncbp1 PE=1 SV=2 - [NCBP1_MOUSE]	77243.9	81981.7	69765.3	35938.4	80147.4	106070	8932.99	32670.2	154750	67131.1	81170.2	51265.6	129427	161890	8932.99	45767.7	0	1	0	0	1	0	0	0
Q9CR68	10	10	303.09	0.46105	1.29011	PD-L1-KO	wild type	Cytochrome b-c1 complex subunit Rieske, mitochondrial OS=Mus musculus GN=Uqcrfs1 PE=1 SV=1 - [UCRI_MOUSE]	1.17565e+06	1.40133e+06	1.63467e+06	1.53424e+06	2.83866e+06	2.17002e+06	1.36936e+06	1.0348e+06	2.3553e+06	1.14749e+06	1.9019e+06	2.18858e+06	4.58404e+06	3.312e+06	1.36936e+06	1.44965e+06	4	3	3	4	5	5	3	3
Q3TQI7	1	1	83.62	0.461543	1.15625	wild type	PD-L1-KO	Uncharacterized protein C9orf78 homolog OS=Mus musculus PE=1 SV=2 - [CI078_MOUSE]	44730.5	51518	42328.7	73102.4	30351.1	45766.7	74301.9	32654.7	89612.7	42185.8	49248.4	104280	49012.7	69851.6	74301.9	45746	1	1	0	1	0	0	1	1
Q9CZT6	1	1	48.59	0.461587	1.32043	wild type	PD-L1-KO	Protein CMSS1 OS=Mus musculus GN=Cmss1 PE=2 SV=1 - [CMS1_MOUSE]	27323.7	13025.6	14304.6	8318.45	13078.4	2738.84	14166.6	17706.9	54740	10666.1	16643	11866.2	21119.8	4180.16	14166.6	24805.6	0	0	0	0	0	0	1	0
Q8K358	2	2	73.2	0.461902	1.16928	PD-L1-KO	wild type	Phosphatidylinositol glycan anchor biosynthesis class U protein OS=Mus musculus GN=Pigu PE=2 SV=4 - [PIGU_MOUSE]	13783	11610.9	0	6949.98	10799.9	991.134	14816.2	11211.9	27612.8	9507.69	0	9914.05	17440.2	1512.72	14816.2	15706.7	0	0	0	0	1	0	1	0
Q9CQL7	1	1	63.94	0.461958	1.41147	wild type	PD-L1-KO	MORF4 family-associated protein 1 OS=Mus musculus GN=Mrfap1 PE=1 SV=1 - [MOFA1_MOUSE]	67904.6	91459	6831.13	105432	9405.29	156033	17438.5	9565.94	136039	74891.7	7947.86	150397	15188.2	238145	17438.5	13400.9	1	1	0	1	0	2	0	0
O55125	1	1	71.22	0.462419	1.16243	PD-L1-KO	wild type	Protein NipSnap homolog 1 OS=Mus musculus GN=Nipsnap1 PE=1 SV=1 - [NIPS1_MOUSE]	74965.2	69121.1	38601.1	40988.5	67405.9	72986.6	76578.9	43036.9	150185	56600.2	44911.4	58469.5	108851	111396	76578.9	60290.3	1	1	1	0	1	0	1	1
Q8R311	1	1	24.34	0.462538	1.18294	PD-L1-KO	wild type	cTAGE family member 5 OS=Mus musculus GN=Ctage5 PE=1 SV=1 - [CTGE5_MOUSE]	4202.18	5586.9	8866.35	5196.23	10070.2	5165.87	7401.4	5577.56	8418.61	4574.86	10315.8	7412.36	16262	7884.43	7401.4	7813.61	0	0	1	0	1	0	0	0
P26883	4	4	249.52	0.462667	1.15924	wild type	PD-L1-KO	Peptidyl-prolyl cis-trans isomerase FKBP1A OS=Mus musculus GN=Fkbp1a PE=1 SV=2 - [FKB1A_MOUSE]	1.22623e+06	1.45883e+06	829851	1.13067e+06	723622	1.43241e+06	1.3232e+06	528213	2.45661e+06	1.19457e+06	965512	1.61289e+06	1.16855e+06	2.18622e+06	1.3232e+06	739974	4	4	2	3	2	2	3	3
P27659	22	22	1011.99	0.462899	1.10765	wild type	PD-L1-KO	60S ribosomal protein L3 OS=Mus musculus GN=Rpl3 PE=2 SV=3 - [RL3_MOUSE]	2.09092e+06	1.91653e+06	2.40827e+06	2.04616e+06	2.18929e+06	2.78543e+06	1.40553e+06	1.25924e+06	4.18894e+06	1.56936e+06	2.80197e+06	2.91882e+06	3.53539e+06	4.25126e+06	1.40553e+06	1.76406e+06	9	6	11	4	11	4	8	7
P62267	13	13	635.21	0.46317	1.29665	wild type	PD-L1-KO	40S ribosomal protein S23 OS=Mus musculus GN=Rps23 PE=2 SV=3 - [RS23_MOUSE]	1.01019e+06	835359	179820	800264	132973	1.33915e+06	572132	134920	2.02381e+06	684038	209216	1.14157e+06	214733	2.04388e+06	572132	189009	7	5	2	4	1	5	5	2
Q91WM2	2	2	181.78	0.463276	1.11763	wild type	PD-L1-KO	Cat eye syndrome critical region protein 5 homolog OS=Mus musculus GN=Cecr5 PE=2 SV=1 - [CECR5_MOUSE]	263388	301275	238705	323494	148595	301613	314303	243747	527669	246701	277728	461460	239960	460337	314303	341465	2	2	2	2	2	3	2	2
P63276	4	4	177.49	0.463396	1.14033	wild type	PD-L1-KO	40S ribosomal protein S17 OS=Mus musculus GN=Rps17 PE=1 SV=2 - [RS17_MOUSE]	624686	427779	584644	452326	451373	771679	394438	214811	1.25149e+06	350289	680219	645237	728903	1.17778e+06	394438	300928	2	0	3	1	3	1	2	3
Q9CQU5	1	1	50.24	0.463606	11.8832	PD-L1-KO	wild type	ZW10 interactor OS=Mus musculus GN=Zwint PE=2 SV=1 - [ZWINT_MOUSE]	1108.48	4998.2	1679.67	0	1286.51	90570.2	442.69	227.654	2220.73	4092.8	1954.25	0	2077.53	138233	442.69	318.921	0	0	0	0	0	1	0	0
Q9D0M0	3	3	220.93	0.464237	1.13789	PD-L1-KO	wild type	Exosome complex exonuclease RRP42 OS=Mus musculus GN=Exosc7 PE=2 SV=2 - [EXOS7_MOUSE]	132600	146263	59511.1	104505	135955	139805	133126	95063.7	265649	119768	69239.7	149075	219549	213378	133126	133175	2	1	2	2	3	2	3	2
Q91WQ3	1	1	53.93	0.464626	1.14766	wild type	PD-L1-KO	Tyrosine--tRNA ligase, cytoplasmic OS=Mus musculus GN=Yars PE=2 SV=3 - [SYYC_MOUSE]	51085.2	74567.3	44080.2	62465.2	43875.6	80544.5	46965.6	30936.3	102344	61059.8	51286.3	89105.8	70852.8	122931	46965.6	43338.7	1	1	1	1	1	1	1	1
Q9D1M0	1	1	75.22	0.465104	1.33791	wild type	PD-L1-KO	Protein SEC13 homolog OS=Mus musculus GN=Sec13 PE=2 SV=3 - [SEC13_MOUSE]	102098	69541.4	68516.8	27194.7	62989.1	29961.1	84164.9	22712.5	204542	56944.4	79717.6	38792.8	101718	45728.2	84164.9	31817.9	1	1	0	1	0	0	1	0
Q9D358	1	1	132.93	0.465108	1.13782	wild type	PD-L1-KO	Low molecular weight phosphotyrosine protein phosphatase OS=Mus musculus GN=Acp1 PE=1 SV=3 - [PPAC_MOUSE]	139281	170086	130703	164273	125443	150883	203210	51605.7	279035	139276	152070	234333	202573	230286	203210	72294.3	1	1	0	1	1	1	1	0
Q8BK67	30	30	1259.83	0.46524	1.12086	wild type	PD-L1-KO	Protein RCC2 OS=Mus musculus GN=Rcc2 PE=2 SV=1 - [RCC2_MOUSE]	856465	954770	1.18904e+06	1.31594e+06	995150	878571	1.26726e+06	709833	1.71584e+06	781819	1.38342e+06	1.87717e+06	1.60703e+06	1.34092e+06	1.26726e+06	994405	7	5	13	12	14	7	14	10
O89079	10	10	590.02	0.465716	1.1009	wild type	PD-L1-KO	Coatomer subunit epsilon OS=Mus musculus GN=Cope PE=2 SV=3 - [COPE_MOUSE]	987106	1.13205e+06	1.15609e+06	1.03522e+06	979461	1.45118e+06	872856	611918	1.97756e+06	926989	1.34508e+06	1.47673e+06	1.58169e+06	2.21487e+06	872856	857235	3	4	6	4	4	5	3	2
P99027	5	5	281.49	0.466198	1.25914	wild type	PD-L1-KO	60S acidic ribosomal protein P2 OS=Mus musculus GN=Rplp2 PE=1 SV=3 - [RLA2_MOUSE]	976990	609808	520146	302211	485308	157945	950340	319747	1.95729e+06	499345	605177	431100	783704	241064	950340	447934	5	5	4	2	3	1	4	3
Q8BLF1	1	1	23.5	0.466588	1.38169	PD-L1-KO	wild type	Neutral cholesterol ester hydrolase 1 OS=Mus musculus GN=Nceh1 PE=1 SV=1 - [NCEH1_MOUSE]	3588.14	1799.87	24510	26204.4	26086.8	3673.02	24591.4	23165.2	7188.45	1473.83	28516.8	37380.3	42126.5	5605.96	24591.4	32452.2	0	0	0	0	1	0	0	0
Q9Z1T1	1	1	52.35	0.466589	1.41326	wild type	PD-L1-KO	AP-3 complex subunit beta-1 OS=Mus musculus GN=Ap3b1 PE=1 SV=2 - [AP3B1_MOUSE]	16663.4	9575.87	15505.2	4414.49	11436.6	3598.74	9770.24	7855.85	33383.3	7841.25	18039.9	6297.21	18468.4	5492.58	9770.24	11005.3	1	1	1	0	0	0	0	0
Q9D0W5	3	3	103.59	0.466846	1.0862	wild type	PD-L1-KO	Peptidyl-prolyl cis-trans isomerase-like 1 OS=Mus musculus GN=Ppil1 PE=2 SV=1 - [PPIL1_MOUSE]	102853	90010.1	101920	94664.3	83658.9	87313.4	124285	63283.5	206055	73705.2	118582	135037	135097	133262	124285	88653.9	1	0	1	2	2	1	2	1
Q9EPB4	7	7	378.46	0.467562	1.15114	wild type	PD-L1-KO	Apoptosis-associated speck-like protein containing a CARD OS=Mus musculus GN=Pycard PE=1 SV=1 - [ASC_MOUSE]	2.66398e+06	3.6584e+06	2.50581e+06	4.15306e+06	1.20191e+06	4.33502e+06	4.20822e+06	1.53171e+06	5.337e+06	2.9957e+06	2.91545e+06	5.92429e+06	1.94092e+06	6.61634e+06	4.20822e+06	2.14577e+06	6	5	3	3	3	4	5	4
Q922U1	4	4	165.94	0.468606	1.17657	PD-L1-KO	wild type	U4/U6 small nuclear ribonucleoprotein Prp3 OS=Mus musculus GN=Prpf3 PE=1 SV=1 - [PRPF3_MOUSE]	100944	132227	148257	144242	184993	94646.4	183910	154939	202231	108275	172493	205759	298737	144454	183910	217054	0	1	1	3	2	2	2	1
Q00PI9	31	31	1669.86	0.46861	1.11303	wild type	PD-L1-KO	Heterogeneous nuclear ribonucleoprotein U-like protein 2 OS=Mus musculus GN=Hnrnpul2 PE=1 SV=2 - [HNRL2_MOUSE]	2.73339e+06	3.36376e+06	2.37052e+06	3.37363e+06	2.70197e+06	3.67019e+06	2.34512e+06	1.9215e+06	5.47605e+06	2.75443e+06	2.75804e+06	4.81245e+06	4.36329e+06	5.60164e+06	2.34512e+06	2.69183e+06	15	12	16	16	21	10	13	12
Q9DB77	20	20	1055.37	0.468853	1.08556	wild type	PD-L1-KO	Cytochrome b-c1 complex subunit 2, mitochondrial OS=Mus musculus GN=Uqcrc2 PE=1 SV=1 - [QCR2_MOUSE]	3.29672e+06	4.02107e+06	2.94839e+06	3.11188e+06	3.20123e+06	3.26015e+06	3.51041e+06	2.35181e+06	6.60463e+06	3.29267e+06	3.43038e+06	4.43906e+06	5.16953e+06	4.97582e+06	3.51041e+06	3.29465e+06	11	8	9	9	15	8	11	10
A2APB8	2	2	86.77	0.469304	1.60524	PD-L1-KO	wild type	Targeting protein for Xklp2 OS=Mus musculus GN=Tpx2 PE=1 SV=1 - [TPX2_MOUSE]	2331.89	7943.16	13180.7	13921.9	18009.2	29147.5	4814.24	8029.43	4671.7	6504.3	15335.4	19859.4	29082.2	44486.4	4814.24	11248.4	0	0	1	2	0	0	0	0
P50096	4	1	212.78	0.469591	1.13734	PD-L1-KO	wild type	Inosine-5'-monophosphate dehydrogenase 1 OS=Mus musculus GN=Impdh1 PE=2 SV=2 - [IMDH1_MOUSE]	15089.2	19998.7	13846.6	575.816	15338.3	8128.96	17062.3	15780.7	30229.6	16376.1	16110.1	821.394	24769.2	12406.8	17062.3	22107.1	0	0	0	0	0	0	1	0
Q5NCR9	4	4	156.96	0.469793	1.15198	PD-L1-KO	wild type	Nuclear speckle splicing regulatory protein 1 OS=Mus musculus GN=Nsrp1 PE=1 SV=1 - [NSRP1_MOUSE]	19196.8	15808.1	34420.5	20405.3	35072.9	19070.7	23495.8	25844.2	38458.6	12944.6	40047.5	29107.9	56637.7	29106.8	23495.8	36205.1	0	0	2	1	2	0	0	2
Q8BZR9	2	2	131.56	0.471923	1.13747	wild type	PD-L1-KO	Uncharacterized protein C17orf85 homolog OS=Mus musculus PE=1 SV=1 - [CQ085_MOUSE]	46956.5	52574.5	38310.1	40490	46217.8	52297.7	4697.82	53564.7	94072.4	43050.9	44572.9	57758.4	74635.3	79819.5	4697.82	75038.8	1	1	1	1	1	0	0	1
Q99JX3	6	6	309.87	0.471968	1.12039	wild type	PD-L1-KO	Golgi reassembly-stacking protein 2 OS=Mus musculus GN=Gorasp2 PE=1 SV=3 - [GORS2_MOUSE]	414731	566905	333085	438128	397395	451614	410738	304754	830869	464213	387536	624984	641736	689278	410738	426930	4	3	3	3	4	2	2	3
Q91ZW3	34	34	1511.64	0.472338	1.05125	PD-L1-KO	wild type	SWI/SNF-related matrix-associated actin-dependent regulator of chromatin subfamily A member 5 OS=Mus musculus GN=Smarca5 PE=1 SV=1 - [SMCA5_MOUSE]	1.64633e+06	1.89416e+06	1.58526e+06	2.11311e+06	1.95362e+06	1.8677e+06	2.02089e+06	1.76763e+06	3.29824e+06	1.55105e+06	1.84441e+06	3.01432e+06	3.15482e+06	2.85058e+06	2.02089e+06	2.47627e+06	7	9	15	14	20	13	13	14
Q6NZB0	4	4	203.27	0.472543	1.3578	wild type	PD-L1-KO	DnaJ homolog subfamily C member 8 OS=Mus musculus GN=Dnajc8 PE=2 SV=2 - [DNJC8_MOUSE]	411817	276297	234294	107070	177521	95687.1	314521	170464	825030	226247	272596	152734	286670	146043	314521	238803	3	2	3	1	3	1	3	2
Q9JJ11	1	1	28.03	0.472909	1.01633	wild type	PD-L1-KO	Transforming acidic coiled-coil-containing protein 3 OS=Mus musculus GN=Tacc3 PE=1 SV=1 - [TACC3_MOUSE]	0	203.58	12719.3	1087.91	43.094	5355.72	6706.3	1680.5	0	166.703	14798.6	1551.89	69.5907	8174.18	6706.3	2354.21	0	0	0	0	0	0	0	0
Q9Z0P5	15	15	846.61	0.47328	1.07679	wild type	PD-L1-KO	Twinfilin-2 OS=Mus musculus GN=Twf2 PE=1 SV=1 - [TWF2_MOUSE]	1.80333e+06	1.81249e+06	1.69527e+06	1.74431e+06	1.61473e+06	1.23861e+06	2.27024e+06	1.42868e+06	3.61279e+06	1.48416e+06	1.9724e+06	2.48824e+06	2.60756e+06	1.89044e+06	2.27024e+06	2.00143e+06	9	12	7	9	10	10	10	7
Q3UPF5	6	6	272	0.473744	1.19225	PD-L1-KO	wild type	Zinc finger CCCH-type antiviral protein 1 OS=Mus musculus GN=Zc3hav1 PE=1 SV=1 - [ZCCHV_MOUSE]	227753	202819	261221	104699	321390	254855	152800	220570	456278	166079	303924	149352	519000	388972	152800	308997	2	1	4	0	3	1	1	3
P14429	7	2	359.64	0.473922	1.15561	PD-L1-KO	wild type	H-2 class I histocompatibility antigen, Q7 alpha chain OS=Mus musculus GN=H2-Q7 PE=1 SV=1 - [HA17_MOUSE]	78911.9	28448.3	60395.5	10141.7	30719.8	58216.2	57566.1	59078.2	158091	23295.1	70268.7	14467	49608.1	88852.7	57566.1	82762.6	2	1	1	0	1	0	2	2
Q62419	6	5	267.66	0.474219	1.32948	wild type	PD-L1-KO	Endophilin-A2 OS=Mus musculus GN=Sh3gl1 PE=1 SV=1 - [SH3G1_MOUSE]	57294.7	30045.2	68407.5	22674.5	41068.3	8267.3	44033.3	40835.2	114784	24602.7	79590.5	32344.9	66319.5	12618	44033.3	57206	0	0	1	1	1	0	2	1
P54227	12	10	710.46	0.474237	1.10787	PD-L1-KO	wild type	Stathmin OS=Mus musculus GN=Stmn1 PE=1 SV=2 - [STMN1_MOUSE]	5.19582e+06	7.25522e+06	5.89745e+06	8.48384e+06	7.08045e+06	8.86003e+06	7.9816e+06	5.80455e+06	1.04093e+07	5.94098e+06	6.86154e+06	1.21021e+07	1.14339e+07	1.35226e+07	7.9816e+06	8.13159e+06	8	11	11	11	11	10	11	12
Q61937	21	21	1162.74	0.4743	1.19339	PD-L1-KO	wild type	Nucleophosmin OS=Mus musculus GN=Npm1 PE=1 SV=1 - [NPM_MOUSE]	1.37159e+07	1.71641e+07	1.23396e+07	1.98238e+07	1.66116e+07	2.75368e+07	1.88153e+07	1.22721e+07	2.74783e+07	1.40549e+07	1.43568e+07	2.82784e+07	2.68253e+07	4.20281e+07	1.88153e+07	1.71919e+07	11	13	13	13	16	16	21	14
Q99JP4	4	4	129.91	0.474533	1.14871	PD-L1-KO	wild type	Anaphase-promoting complex subunit CDC26 OS=Mus musculus GN=Cdc26 PE=2 SV=1 - [CDC26_MOUSE]	36296.3	39305.9	50240.7	65068	65443	37520	64604.4	51733.4	72715.6	32185.9	58453.8	92818.7	105681	57265.1	64604.4	72473.3	1	1	1	2	0	1	2	1
Q99P72	3	3	166.63	0.474733	1.13894	wild type	PD-L1-KO	Reticulon-4 OS=Mus musculus GN=Rtn4 PE=1 SV=2 - [RTN4_MOUSE]	177858	167778	180690	110717	101500	223958	101168	132703	356319	137386	210228	157936	163909	341817	101168	185904	1	0	1	0	0	2	1	2
P22907	3	3	63.27	0.475203	1.49005	wild type	PD-L1-KO	Porphobilinogen deaminase OS=Mus musculus GN=Hmbs PE=2 SV=2 - [HEM3_MOUSE]	15299.1	48208.1	81246.3	30749.5	45759.5	23277	38858.7	9887.79	30650	39475.5	94528.1	43863.8	73895.1	35526.6	38858.7	13851.8	0	0	1	0	1	0	1	0
O08579	6	6	320.83	0.475444	1.07498	PD-L1-KO	wild type	Emerin OS=Mus musculus GN=Emd PE=1 SV=1 - [EMD_MOUSE]	255015	316617	267416	326617	313925	375687	291506	271945	510894	259263	311132	465915	506945	573393	291506	380968	2	1	3	4	3	3	0	2
Q68FL6	6	6	256.17	0.476206	1.19038	wild type	PD-L1-KO	Methionine--tRNA ligase, cytoplasmic OS=Mus musculus GN=Mars PE=2 SV=1 - [SYMC_MOUSE]	122479	130540	177902	86307.8	150963	117537	120227	45781.6	245373	106893	206985	123117	243783	179391	120227	64135.4	1	1	4	0	3	2	1	1
Q9WV85	1	1	46.79	0.47638	1.94976	PD-L1-KO	wild type	Nucleoside diphosphate kinase 3 OS=Mus musculus GN=Nme3 PE=2 SV=3 - [NDK3_MOUSE]	14020.2	4859.29	1618.84	1443.58	17858.2	19712.1	1483.9	3727.21	28088	3979.05	1883.48	2059.24	28838.5	30085.6	1483.9	5221.44	0	0	0	0	1	0	0	0
P61202	2	2	80.41	0.476489	1.16549	PD-L1-KO	wild type	COP9 signalosome complex subunit 2 OS=Mus musculus GN=Cops2 PE=1 SV=1 - [CSN2_MOUSE]	4730.56	1814.4	52498.5	3415.45	49168.1	9296.59	5483.17	8847.6	9477.17	1485.73	61080.7	4872.09	79399.5	14188.9	5483.17	12394.6	0	0	2	0	1	0	0	0
Q9Z1Z0	2	2	144.09	0.476827	1.14606	wild type	PD-L1-KO	General vesicular transport factor p115 OS=Mus musculus GN=Uso1 PE=1 SV=2 - [USO1_MOUSE]	39768.6	30489.9	35811.6	22707	20086.9	43548.8	29203.7	19526	79672	24966.8	41665.9	32391.3	32437.4	66466.5	29203.7	27353.9	2	2	0	1	0	2	1	1
P62869	5	5	172.87	0.477738	1.20382	wild type	PD-L1-KO	Transcription elongation factor B polypeptide 2 OS=Mus musculus GN=Tceb2 PE=1 SV=1 - [ELOB_MOUSE]	422791	751040	652478	1.2689e+06	623752	1.33682e+06	483256	127330	847016	614993	759142	1.81006e+06	1.00727e+06	2.04033e+06	483256	178377	2	1	3	1	5	0	1	2
Q9JII6	5	4	235.58	0.477776	1.14074	wild type	PD-L1-KO	Alcohol dehydrogenase [NADP(+)] OS=Mus musculus GN=Akr1a1 PE=1 SV=3 - [AK1A1_MOUSE]	675137	667363	474690	590344	607914	793318	621007	88265.3	1.35256e+06	546474	552290	842118	981695	1.2108e+06	621007	123651	2	3	3	2	1	0	2	1
Q8K4Z3	1	1	28.96	0.477873	1.13117	wild type	PD-L1-KO	NAD(P)H-hydrate epimerase OS=Mus musculus GN=Apoa1bp PE=1 SV=1 - [NNRE_MOUSE]	160806	195873	121862	183888	143281	195159	153876	93295.5	322157	160391	141783	262314	231378	297862	153876	130698	1	0	0	0	1	0	0	0
Q8VEK0	1	1	49.99	0.478149	1.10047	PD-L1-KO	wild type	Cell cycle control protein 50A OS=Mus musculus GN=Tmem30a PE=1 SV=1 - [CC50A_MOUSE]	33461.6	28664.6	4404.71	5375.25	17318	11584.2	25728.2	24500.2	67036.8	23472.1	5124.77	7667.72	27966.2	17680.4	25728.2	34322.3	1	0	0	0	0	0	1	0
P97742	5	5	204.7	0.478192	1.09293	wild type	PD-L1-KO	Carnitine O-palmitoyltransferase 1, liver isoform OS=Mus musculus GN=Cpt1a PE=1 SV=4 - [CPT1A_MOUSE]	242229	221090	177079	198230	200269	147637	164995	254416	485280	181040	206027	282773	323407	225331	164995	356411	3	0	2	2	3	0	0	2
Q9Z0F4	1	1	34.17	0.478306	1.37596	wild type	PD-L1-KO	Calcium and integrin-binding protein 1 OS=Mus musculus GN=Cib1 PE=1 SV=3 - [CIB1_MOUSE]	33372.8	16794.7	12572.4	8097.39	23354.6	6420.18	14210.6	7496.76	66858.7	13752.4	14627.7	11550.8	37714.3	9798.82	14210.6	10502.2	0	0	0	0	1	0	0	0
P70444	1	1	49.37	0.47896	1.13673	wild type	PD-L1-KO	BH3-interacting domain death agonist OS=Mus musculus GN=Bid PE=1 SV=2 - [BID_MOUSE]	23209.2	15560.5	26794.7	26590.5	9429.79	16007.5	39024.2	16608.7	46497.1	12741.8	31175	37930.9	15227.8	24431.5	39024.2	23267.1	0	0	1	0	0	0	1	1
P52912	3	2	108.27	0.479059	1.18656	PD-L1-KO	wild type	Nucleolysin TIA-1 OS=Mus musculus GN=Tia1 PE=1 SV=1 - [TIA1_MOUSE]	18534.8	17731.4	10885.3	18981.5	15954.7	25391.8	24065.9	13058.5	37132.6	14519.5	12664.8	27076.8	25764.7	38754.3	24065.9	18293.7	0	0	0	1	0	1	0	0
P35235	3	3	145.63	0.479437	1.13345	PD-L1-KO	wild type	Tyrosine-protein phosphatase non-receptor type 11 OS=Mus musculus GN=Ptpn11 PE=1 SV=2 - [PTN11_MOUSE]	10180.6	25106.9	105752	109367	93643.8	35130.7	89163.8	65884.6	20395.8	20559	123040	156010	151221	53618.3	89163.8	92297.6	0	0	2	2	2	1	1	2
Q9D385	2	2	130	0.479866	1.21779	wild type	PD-L1-KO	ADP-ribosylation factor-like protein 2-binding protein OS=Mus musculus GN=Arl2bp PE=1 SV=1 - [AR2BP_MOUSE]	6449.14	4468.14	11204.6	15227.5	4091.03	4145.29	18752.9	3680.52	12920.1	3658.76	13036.2	21721.8	6606.43	6326.77	18752.9	5156.03	0	0	1	0	1	0	1	0
P61089	8	8	389.57	0.48013	1.14846	wild type	PD-L1-KO	Ubiquitin-conjugating enzyme E2 N OS=Mus musculus GN=Ube2n PE=1 SV=1 - [UBE2N_MOUSE]	1.2188e+06	1.76171e+06	1.32761e+06	2.25564e+06	1.4415e+06	1.39715e+06	1.6152e+06	1.26141e+06	2.44174e+06	1.44258e+06	1.54464e+06	3.21764e+06	2.32782e+06	2.13241e+06	1.6152e+06	1.7671e+06	3	6	6	4	8	5	2	4
Q02395	2	2	155.87	0.480341	1.08833	wild type	PD-L1-KO	Metal-response element-binding transcription factor 2 OS=Mus musculus GN=Mtf2 PE=1 SV=2 - [MTF2_MOUSE]	35561	42530.2	34696.2	40489.7	29715.5	49421.7	35653.7	26045.9	71242.6	34826.1	40368.2	57758	47986.3	75430	35653.7	36487.7	0	1	1	0	1	0	1	0
Q921T2	6	6	228.67	0.480432	1.3535	wild type	PD-L1-KO	Torsin-1A-interacting protein 1 OS=Mus musculus GN=Tor1aip1 PE=1 SV=3 - [TOIP1_MOUSE]	1.33025e+06	1.24186e+06	402428	513276	456513	1.31996e+06	412499	387901	2.66501e+06	1.0169e+06	468216	732182	737204	2.01459e+06	412499	543411	3	2	2	1	1	0	1	0
Q6ZQ88	2	2	133.57	0.481001	1.12853	wild type	PD-L1-KO	Lysine-specific histone demethylase 1A OS=Mus musculus GN=Kdm1a PE=1 SV=2 - [KDM1A_MOUSE]	106343	124183	76769.9	92726.2	93042.8	114918	90702.1	55798.5	213047	101688	89319.9	132273	150251	175394	90702.1	78168	1	2	2	0	2	1	1	1
P68433	26	5	953.49	0.481249	1.28562	wild type	PD-L1-KO	Histone H3.1 OS=Mus musculus GN=Hist1h3a PE=1 SV=2 - [H31_MOUSE]	3.93624e+06	1.78966e+06	3.85588e+06	1.09487e+06	4.56028e+06	1.22927e+06	2.04632e+06	468817	7.88583e+06	1.46547e+06	4.48622e+06	1.56182e+06	7.36421e+06	1.87618e+06	2.04632e+06	656765	1	1	1	2	3	2	2	2
P60843	19	12	953.35	0.481352	1.09924	wild type	PD-L1-KO	Eukaryotic initiation factor 4A-I OS=Mus musculus GN=Eif4a1 PE=2 SV=1 - [IF4A1_MOUSE]	1.62134e+06	1.76217e+06	1.42625e+06	1.99345e+06	1.12311e+06	2.95947e+06	1.09972e+06	1.00672e+06	3.24817e+06	1.44297e+06	1.6594e+06	2.84363e+06	1.81367e+06	4.5169e+06	1.09972e+06	1.41031e+06	4	3	6	3	6	4	6	6
Q8VE22	1	1	36.27	0.481436	1.16848	wild type	PD-L1-KO	28S ribosomal protein S23, mitochondrial OS=Mus musculus GN=Mrps23 PE=2 SV=1 - [RT23_MOUSE]	36514	51251	25436.5	33560.2	6919.63	28621.2	52058.1	38001.2	73152	41967.2	29594.8	47873.2	11174.2	43683.1	52058.1	53235.9	1	0	0	0	0	0	0	1
P35279	4	2	200.58	0.482024	1.37346	wild type	PD-L1-KO	Ras-related protein Rab-6A OS=Mus musculus GN=Rab6a PE=1 SV=4 - [RAB6A_MOUSE]	41377.4	24530.2	35615.3	8020.32	23530.8	2919.26	38772.6	14534.2	82895.2	20086.7	41437.6	11440.9	37998.9	4455.54	38772.6	20361	2	1	2	0	2	0	2	1
Q99KQ4	1	1	72.26	0.482097	1.39339	PD-L1-KO	wild type	Nicotinamide phosphoribosyltransferase OS=Mus musculus GN=Nampt PE=1 SV=1 - [NAMPT_MOUSE]	52714.6	81174.1	62371.8	71724.8	41346.2	87473.5	166471	78117.2	105608	66469.8	72568	102314	66768.3	133507	166471	109434	0	1	0	1	1	1	0	0
Q9CQU3	1	1	82.62	0.482455	1.18516	wild type	PD-L1-KO	Protein RER1 OS=Mus musculus GN=Rer1 PE=1 SV=1 - [RER1_MOUSE]	166714	128901	123842	79111.8	146335	54397	102601	117344	333994	105551	144087	112852	236311	83023.6	102601	164387	1	0	1	1	1	0	0	1
Q6P4T2	24	24	1206.01	0.482593	1.09566	PD-L1-KO	wild type	U5 small nuclear ribonucleoprotein 200 kDa helicase OS=Mus musculus GN=Snrnp200 PE=2 SV=1 - [U520_MOUSE]	1.54481e+06	1.21239e+06	1.54388e+06	905080	1.57115e+06	1.47115e+06	1.5016e+06	1.16026e+06	3.09487e+06	992770	1.79627e+06	1.29108e+06	2.53719e+06	2.24534e+06	1.5016e+06	1.6254e+06	10	5	16	8	14	3	12	10
Q61704	1	1	44.63	0.482986	1.54773	wild type	PD-L1-KO	Inter-alpha-trypsin inhibitor heavy chain H3 OS=Mus musculus GN=Itih3 PE=1 SV=3 - [ITIH3_MOUSE]	27959.3	16796.4	20453	153329	86498.3	987.176	19032	34681.7	56013.5	13753.8	23796.5	218723	139683	1506.68	19032	48585.6	0	0	1	0	0	0	0	0
O70310	1	1	64.42	0.483082	1.23589	wild type	PD-L1-KO	Glycylpeptide N-tetradecanoyltransferase 1 OS=Mus musculus GN=Nmt1 PE=1 SV=1 - [NMT1_MOUSE]	106600	109340	241529	175600	115378	179008	134447	83404.7	213563	89533.9	281013	250491	186320	273212	134447	116842	1	1	1	0	1	1	1	1
Q9CW03	19	17	942.62	0.483313	1.08894	wild type	PD-L1-KO	Structural maintenance of chromosomes protein 3 OS=Mus musculus GN=Smc3 PE=1 SV=2 - [SMC3_MOUSE]	606243	580758	527304	453430	369200	575404	603019	443054	1.21454e+06	475557	613505	646812	596206	878211	603019	620675	6	3	5	4	7	6	3	8
Q64337	2	2	48.57	0.483429	1.08882	wild type	PD-L1-KO	Sequestosome-1 OS=Mus musculus GN=Sqstm1 PE=1 SV=1 - [SQSTM_MOUSE]	37112.9	46025.4	40531.3	37823.8	28358.3	72909.2	27710.7	19340.9	74351.6	37688.1	47157.1	53955.1	45794.7	111278	27710.7	27094.7	0	0	1	0	0	1	0	0
P06745	7	7	389.48	0.484269	1.28949	wild type	PD-L1-KO	Glucose-6-phosphate isomerase OS=Mus musculus GN=Gpi PE=1 SV=4 - [G6PI_MOUSE]	566994	365997	439203	183577	355518	353191	401040	96753.2	1.13591e+06	299699	511002	261871	574111	539058	401040	135542	6	0	6	1	6	0	3	0
Q9CQN7	1	1	37.87	0.484321	1.62025	PD-L1-KO	wild type	39S ribosomal protein L41, mitochondrial OS=Mus musculus GN=Mrpl41 PE=2 SV=1 - [RM41_MOUSE]	4235	8359.53	15888.4	3485.73	23618.3	3380.33	7474.51	17323.9	8484.36	6845.25	18485.8	4972.35	38140.2	5159.24	7474.51	24269.1	0	0	0	0	0	0	0	0
O88532	1	1	42.45	0.48488	1.01123	wild type	PD-L1-KO	Zinc finger RNA-binding protein OS=Mus musculus GN=Zfr PE=1 SV=2 - [ZFR_MOUSE]	38378.5	49859.4	406.615	45301	33079	37266.9	35223.4	26888.7	76887.2	40827.7	473.086	64621.3	53418	56878.8	35223.4	37668.3	1	0	0	1	0	0	0	0
Q9D0F6	1	1	43.9	0.484911	1.18943	wild type	PD-L1-KO	Replication factor C subunit 5 OS=Mus musculus GN=Rfc5 PE=2 SV=1 - [RFC5_MOUSE]	23776.1	16497	11148.7	38919.2	29520.2	5648.77	35915.2	4869	47632.8	13508.7	12971.2	55517.8	47670.9	8621.44	35915.2	6820.99	0	0	0	1	1	0	0	0
Q9CPP0	4	4	211.98	0.485102	1.15841	PD-L1-KO	wild type	Nucleoplasmin-3 OS=Mus musculus GN=Npm3 PE=2 SV=3 - [NPM3_MOUSE]	295765	401922	205448	373811	366173	503491	351161	258397	592534	329116	239034	533237	591318	768454	351161	361989	2	2	2	1	2	2	2	2
Q9CWY8	6	6	177.51	0.485358	1.38494	PD-L1-KO	wild type	Ribonuclease H2 subunit A OS=Mus musculus GN=Rnaseh2a PE=1 SV=2 - [RNH2A_MOUSE]	18770.9	33069.4	84233.4	26005.2	94294.7	20110.8	42094.2	67969.4	37605.5	27079	98003.5	37096.1	152273	30694.1	42094.2	95218.3	0	0	1	2	2	0	2	1
Q8BUM3	2	2	156.03	0.485739	1.45684	wild type	PD-L1-KO	Tyrosine-protein phosphatase non-receptor type 7 OS=Mus musculus GN=Ptpn7 PE=1 SV=1 - [PTN7_MOUSE]	51711.5	86615.3	108193	244689	123855	111096	60183	42039.3	103598	70925.4	125880	349046	200008	169561	60183	58892.9	1	1	2	1	2	1	1	0
Q9Z2A0	2	2	56.38	0.486117	1.25461	wild type	PD-L1-KO	3-phosphoinositide-dependent protein kinase 1 OS=Mus musculus GN=Pdpk1 PE=1 SV=2 - [PDPK1_MOUSE]	914200	774383	821740	344608	581633	419950	873147	400817	1.8315e+06	634107	956075	491579	939255	640950	873147	561505	1	1	0	1	1	1	1	1
Q1HFZ0	5	4	164.54	0.48612	1.32235	PD-L1-KO	wild type	tRNA (cytosine(34)-C(5))-methyltransferase OS=Mus musculus GN=Nsun2 PE=1 SV=2 - [NSUN2_MOUSE]	258719	264315	301393	132707	307881	531678	269881	156231	518317	216436	350664	189305	497184	811476	269881	218863	3	1	0	1	1	3	3	2
Q8BHX3	3	3	173.15	0.487134	1.10795	PD-L1-KO	wild type	Borealin OS=Mus musculus GN=Cdca8 PE=2 SV=2 - [BOREA_MOUSE]	67655.7	82495.5	86951.7	125882	91406.6	118426	80415.6	111920	135541	67551.9	101166	179569	147609	180749	80415.6	156789	0	0	0	1	1	0	1	1
P51660	13	13	660.28	0.487227	1.14469	wild type	PD-L1-KO	Peroxisomal multifunctional enzyme type 2 OS=Mus musculus GN=Hsd17b4 PE=1 SV=3 - [DHB4_MOUSE]	461269	388562	426389	275220	387662	165720	507956	293996	924103	318176	496093	392598	626019	252931	507956	411859	5	4	8	6	9	2	7	5
P70698	1	1	37.65	0.487268	1.48054	wild type	PD-L1-KO	CTP synthase 1 OS=Mus musculus GN=Ctps1 PE=1 SV=2 - [PYRG1_MOUSE]	28457	119271	17509.3	24091.5	3753.31	60995.3	50994.6	12135.3	57010.5	97665.9	20371.7	34366.2	6061.07	93094.2	50994.6	17000.3	0	0	0	0	0	0	0	0
O70370	4	4	224.53	0.487751	1.10356	wild type	PD-L1-KO	Cathepsin S OS=Mus musculus GN=Ctss PE=2 SV=2 - [CATS_MOUSE]	212961	414416	295443	385501	237840	249006	643322	55373.9	426645	339347	343741	549912	384078	380045	643322	77573.3	1	1	3	2	3	1	2	1
Q00612	7	7	373.76	0.488033	1.11488	wild type	PD-L1-KO	Glucose-6-phosphate 1-dehydrogenase X OS=Mus musculus GN=G6pdx PE=1 SV=3 - [G6PD1_MOUSE]	212279	223762	169861	142239	162802	219604	156810	131832	425278	183228	197629	202903	262902	335171	156810	184683	4	3	5	3	4	3	4	4
P06151	12	12	481.58	0.48819	1.09922	wild type	PD-L1-KO	L-lactate dehydrogenase A chain OS=Mus musculus GN=Ldha PE=1 SV=3 - [LDHA_MOUSE]	2.91518e+06	2.63159e+06	2.4786e+06	2.12265e+06	2.14325e+06	2.90791e+06	2.66834e+06	1.51249e+06	5.84026e+06	2.15489e+06	2.88379e+06	3.02793e+06	3.46104e+06	4.4382e+06	2.66834e+06	2.11885e+06	6	3	8	5	8	5	9	8
Q63871	1	1	48.29	0.488462	1.16983	wild type	PD-L1-KO	DNA-directed RNA polymerases I, II, and III subunit RPABC4 OS=Mus musculus GN=Polr2k PE=2 SV=2 - [RPAB4_MOUSE]	30131.4	35439.2	17310.1	27516.3	18873.4	35968.9	23522.7	16004.7	60364.9	29019.5	20139.9	39251.6	30477.9	54897.7	23522.7	22421	0	0	1	1	0	1	1	1
Q8BHL5	13	4	407.18	0.488516	1.91394	wild type	PD-L1-KO	Engulfment and cell motility protein 2 OS=Mus musculus GN=Elmo2 PE=1 SV=1 - [ELMO2_MOUSE]	140390	68121.1	43761.5	13943.1	28264.6	46635.3	28806	35387.3	281257	55781.3	50915.4	19889.7	45643.4	71177.3	28806	49574	2	0	2	0	1	1	0	0
Q921G8	1	1	84.79	0.488682	1.64484	wild type	PD-L1-KO	Gamma-tubulin complex component 2 OS=Mus musculus GN=Tubgcp2 PE=2 SV=2 - [GCP2_MOUSE]	52724.4	20255.4	17050.8	7810.12	8406.08	14138.4	22253.1	14685.8	105628	16586.3	19838.2	11141	13574.6	21578.8	22253.1	20573.3	0	1	1	0	1	0	1	1
Q9D287	3	3	109.24	0.488909	1.53865	PD-L1-KO	wild type	Pre-mRNA-splicing factor SPF27 OS=Mus musculus GN=Bcas2 PE=2 SV=1 - [SPF27_MOUSE]	25523.1	25799.1	83001.1	52390.7	128516	19676.4	63162.4	75932.6	51132.7	21125.7	96569.8	74734.7	207536	30031.2	63162.4	106374	0	1	1	1	2	1	0	0
P97315	7	7	384.17	0.488944	1.10655	wild type	PD-L1-KO	Cysteine and glycine-rich protein 1 OS=Mus musculus GN=Csrp1 PE=1 SV=3 - [CSRP1_MOUSE]	1.05772e+06	1.31521e+06	1.16179e+06	1.0962e+06	1.11652e+06	1.46061e+06	1.05184e+06	556027	2.11903e+06	1.07697e+06	1.35171e+06	1.56372e+06	1.80302e+06	2.22926e+06	1.05184e+06	778938	5	4	7	5	5	6	3	2
Q9DCH4	3	3	228.46	0.489049	1.2494	wild type	PD-L1-KO	Eukaryotic translation initiation factor 3 subunit F OS=Mus musculus GN=Eif3f PE=1 SV=2 - [EIF3F_MOUSE]	144515	116568	88182.3	53662	87394.1	67294.7	74252.6	93555.6	289521	95452.1	102598	76548.1	141129	102709	74252.6	131062	2	2	1	0	2	1	0	0
P10820	6	6	364.78	0.489457	1.07468	wild type	PD-L1-KO	Perforin-1 OS=Mus musculus GN=Prf1 PE=1 SV=2 - [PERF_MOUSE]	316610	332846	266409	320142	250874	373960	232164	293117	634294	272553	309960	456679	405125	570757	232164	410627	2	2	2	3	3	2	2	2
Q8K157	1	1	66.73	0.489808	1.29322	wild type	PD-L1-KO	Aldose 1-epimerase OS=Mus musculus GN=Galm PE=2 SV=1 - [GALM_MOUSE]	23303.6	20381.7	16083.9	7230.19	11031.2	4730.33	21478.4	14568.1	46686.2	16689.7	18713.2	10313.8	17813.9	7219.68	21478.4	20408.4	0	0	1	0	1	0	1	1
Q9CWX9	3	3	145.44	0.489968	1.11485	wild type	PD-L1-KO	Probable ATP-dependent RNA helicase DDX47 OS=Mus musculus GN=Ddx47 PE=2 SV=2 - [DDX47_MOUSE]	40673.6	52716	54804.9	57204.4	56551.8	46857.7	54714.6	26115.4	81485.1	43166.8	63764.1	81601.3	91323.1	71516.7	54714.6	36585.1	0	0	2	0	2	0	1	0
Q8CH18	8	8	294.95	0.490076	1.10003	PD-L1-KO	wild type	Cell division cycle and apoptosis regulator protein 1 OS=Mus musculus GN=Ccar1 PE=1 SV=1 - [CCAR1_MOUSE]	311082	366892	308191	230466	411906	277843	353448	295130	623219	300431	358572	328756	665170	424058	353448	413447	3	4	4	4	4	1	3	4
Q9DBC7	11	11	410.62	0.490155	1.09527	wild type	PD-L1-KO	cAMP-dependent protein kinase type I-alpha regulatory subunit OS=Mus musculus GN=Prkar1a PE=1 SV=3 - [KAP0_MOUSE]	899607	954310	821364	1.05582e+06	646996	1.28448e+06	885032	590047	1.80227e+06	781442	955637	1.50611e+06	1.04481e+06	1.96044e+06	885032	826596	3	3	3	6	6	4	3	4
Q9R0N0	1	1	43.7	0.490563	3.61935	PD-L1-KO	wild type	Galactokinase OS=Mus musculus GN=Galk1 PE=2 SV=2 - [GALK1_MOUSE]	219723	176952	68952.5	58149.7	940546	158642	775277	21264.9	440190	144898	80224.5	82949.8	1.51885e+06	242128	775277	29790	0	0	1	0	1	0	1	0
Q3UND0	1	1	51.41	0.491019	1.42811	wild type	PD-L1-KO	Src kinase-associated phosphoprotein 2 OS=Mus musculus GN=Skap2 PE=1 SV=2 - [SKAP2_MOUSE]	11576.8	6309.26	0	942.038	4071.64	1388.24	6812.83	911.232	23193	5166.37	0	1343.8	6575.12	2118.81	6812.83	1276.54	1	0	0	0	0	0	0	0
P62320	12	12	627.58	0.491297	1.16247	PD-L1-KO	wild type	Small nuclear ribonucleoprotein Sm D3 OS=Mus musculus GN=Snrpd3 PE=1 SV=1 - [SMD3_MOUSE]	1.0197e+06	997471	1.32633e+06	1.25289e+06	1.53e+06	823172	1.63326e+06	1.35673e+06	2.04286e+06	816785	1.54315e+06	1.78724e+06	2.47074e+06	1.25637e+06	1.63326e+06	1.90064e+06	10	8	7	5	5	8	5	6
Q9CQW1	1	1	78.47	0.491797	5.86698	PD-L1-KO	wild type	Synaptobrevin homolog YKT6 OS=Mus musculus GN=Ykt6 PE=2 SV=1 - [YKT6_MOUSE]	3291.46	3218.03	2743.81	1392.22	44896.5	14803.8	523.024	2233.83	6594.08	2635.1	3192.36	1985.98	72501.4	22594.3	523.024	3129.37	0	0	0	0	1	0	0	0
O09106	7	4	221.46	0.491816	1.26776	wild type	PD-L1-KO	Histone deacetylase 1 OS=Mus musculus GN=Hdac1 PE=1 SV=1 - [HDAC1_MOUSE]	1.18216e+06	991984	261021	890111	1.30407e+06	228710	930043	160134	2.36833e+06	812292	303691	1.26973e+06	2.10589e+06	349070	930043	224332	3	1	1	2	2	0	2	2
Q9ESU6	2	1	47.35	0.492374	1.16484	PD-L1-KO	wild type	Bromodomain-containing protein 4 OS=Mus musculus GN=Brd4 PE=1 SV=2 - [BRD4_MOUSE]	198.057	104.151	23097.5	266.171	23587.8	1788.36	159.74	2030.88	396.786	85.2846	26873.3	379.69	38091	2729.48	159.74	2845.06	0	0	1	0	0	0	0	0
Q05117	3	3	153.2	0.493415	1.10292	wild type	PD-L1-KO	Tartrate-resistant acid phosphatase type 5 OS=Mus musculus GN=Acp5 PE=2 SV=2 - [PPA5_MOUSE]	102000	110003	109800	73654.5	95175.8	69479.2	109320	84581.9	204346	90076.4	127750	105067	153695	106043	109320	118491	2	1	3	1	3	1	1	1
Q91W34	1	1	40.59	0.493777	1.20432	wild type	PD-L1-KO	UPF0420 protein C16orf58 homolog OS=Mus musculus PE=2 SV=1 - [CP058_MOUSE]	2359.85	4229.1	605.361	6979.54	351.736	8178.96	2944.2	294.317	4727.71	3463.02	704.323	9956.22	568.004	12483.2	2944.2	412.308	0	0	0	1	0	0	0	0
Q99PT1	26	24	1157.73	0.494064	1.14013	wild type	PD-L1-KO	Rho GDP-dissociation inhibitor 1 OS=Mus musculus GN=Arhgdia PE=1 SV=3 - [GDIR1_MOUSE]	1.95942e+07	2.36703e+07	1.60177e+07	2.83354e+07	1.54295e+07	2.71274e+07	2.13145e+07	1.29775e+07	3.92548e+07	1.93826e+07	1.86362e+07	4.04201e+07	2.49165e+07	4.14033e+07	2.13145e+07	1.81802e+07	19	16	16	24	16	21	21	15
Q60773	1	1	39.66	0.494465	2.00146	PD-L1-KO	wild type	Cyclin-dependent kinase 4 inhibitor D OS=Mus musculus GN=Cdkn2d PE=1 SV=2 - [CDN2D_MOUSE]	7105.9	13035.7	3773.66	7048.42	4057.2	13087.8	6058.3	38769.4	14235.9	10674.4	4390.56	10054.5	6551.81	19975.3	6058.3	54312	0	0	0	0	0	0	0	0
P97376	2	2	144.25	0.494668	1.0632	wild type	PD-L1-KO	Protein FRG1 OS=Mus musculus GN=Frg1 PE=1 SV=2 - [FRG1_MOUSE]	359101	414751	320280	345756	354350	320966	394186	284792	719420	339621	372638	493217	572225	489876	394186	398965	3	3	1	2	1	1	2	1
P70290	2	2	78.4	0.495268	1.13728	wild type	PD-L1-KO	55 kDa erythrocyte membrane protein OS=Mus musculus GN=Mpp1 PE=1 SV=1 - [EM55_MOUSE]	22411	35463	29078.5	39049.3	17153.1	45618.1	26754.7	21266	44897.9	29039.1	33832.1	55703.3	27699.8	69624.7	26754.7	29791.5	1	0	1	0	0	0	0	0
Q9QXY6	2	1	51.22	0.495592	1.83481	wild type	PD-L1-KO	EH domain-containing protein 3 OS=Mus musculus GN=Ehd3 PE=1 SV=2 - [EHD3_MOUSE]	8406.41	13547.8	78293.2	1595.28	48101.4	3914.89	1273.29	2216.41	16841.3	11093.7	91092.3	2275.64	77676.9	5975.11	1273.29	3104.97	0	0	1	0	1	0	0	0
Q9QWF0	1	1	62.5	0.495919	1.63886	PD-L1-KO	wild type	Chromatin assembly factor 1 subunit A OS=Mus musculus GN=Chaf1a PE=1 SV=1 - [CAF1A_MOUSE]	4005.14	3173.57	5210.43	2349.92	4449.34	13958.4	3014.59	2732.92	8023.86	2598.7	6062.21	3352.13	7185.05	21304	3014.59	3828.54	1	0	0	0	0	1	0	0
Q9R060	2	2	61.26	0.495978	1.30897	PD-L1-KO	wild type	Cytosolic Fe-S cluster assembly factor NUBP1 OS=Mus musculus GN=Nubp1 PE=1 SV=1 - [NUBP1_MOUSE]	5327.71	3145.26	21200.9	10619.9	21440	4562.2	13800.4	12940.7	10673.5	2575.51	24666.7	15149.1	34622.5	6963.06	13800.4	18128.7	0	0	2	0	1	0	0	0
Q3UKJ7	11	11	584.27	0.496132	1.1858	PD-L1-KO	wild type	WD40 repeat-containing protein SMU1 OS=Mus musculus GN=Smu1 PE=2 SV=2 - [SMU1_MOUSE]	627558	768905	561581	696856	871039	1.06524e+06	740510	471378	1.25725e+06	629622	653386	994056	1.4066e+06	1.62583e+06	740510	660354	5	3	5	3	7	2	6	1
Q6ZQ06	3	3	76.23	0.496197	1.14966	wild type	PD-L1-KO	Protein QN1 homolog OS=Mus musculus GN=Kiaa1009 PE=1 SV=2 - [QN1_MOUSE]	2.44186e+06	2.59244e+06	1.99822e+06	3.68614e+06	2.21648e+06	540229	2.89147e+06	3.67517e+06	4.89199e+06	2.12283e+06	2.32488e+06	5.25823e+06	3.5793e+06	824526	2.89147e+06	5.14855e+06	11	6	5	2	3	5	0	0
Q8C5N3	1	1	24.29	0.496257	2.23402	wild type	PD-L1-KO	Pre-mRNA-splicing factor CWC22 homolog OS=Mus musculus GN=Cwc22 PE=1 SV=1 - [CWC22_MOUSE]	3955.78	4508.17	81305	19479.5	22192.1	23222.5	2448.56	1039	7924.99	3691.54	94596.4	27787.2	35837.1	35443.4	2448.56	1455.54	0	0	1	0	1	0	0	0
Q7TT37	1	1	41.5	0.496675	1.53674	PD-L1-KO	wild type	Elongator complex protein 1 OS=Mus musculus GN=Ikbkap PE=2 SV=2 - [ELP1_MOUSE]	9648.16	6676.71	7459.99	16068.1	6960.08	8358.1	33215.9	12709.5	19329.1	5467.26	8679.52	22920.9	11239.5	12756.6	33215.9	17804.7	0	0	0	0	1	0	0	0
P62774	6	6	314.81	0.498062	1.16534	wild type	PD-L1-KO	Myotrophin OS=Mus musculus GN=Mtpn PE=1 SV=2 - [MTPN_MOUSE]	2.24907e+06	3.15174e+06	1.57393e+06	2.17245e+06	1.70584e+06	2.40944e+06	2.7805e+06	953570	4.50577e+06	2.58082e+06	1.83123e+06	3.09897e+06	2.75469e+06	3.67741e+06	2.7805e+06	1.33586e+06	4	4	4	5	4	5	5	4
Q3UIU2	2	2	65.3	0.498581	1.16494	wild type	PD-L1-KO	NADH dehydrogenase [ubiquinone] 1 beta subcomplex subunit 6 OS=Mus musculus GN=Ndufb6 PE=2 SV=3 - [NDUB6_MOUSE]	100241	93150.5	76676.9	53218.8	81735.1	17636.2	101777	76364.8	200822	76276.8	89211.7	75915.9	131991	26917.3	101777	106979	1	0	1	0	2	0	0	0
P70362	3	3	151.47	0.498611	1.12957	wild type	PD-L1-KO	Ubiquitin fusion degradation protein 1 homolog OS=Mus musculus GN=Ufd1l PE=1 SV=2 - [UFD1_MOUSE]	171492	288360	199767	240518	129524	310609	200116	156640	343567	236125	232424	343097	209163	474068	200116	219436	0	1	2	0	2	0	1	1
P13597	3	3	171.6	0.499085	1.25967	wild type	PD-L1-KO	Intercellular adhesion molecule 1 OS=Mus musculus GN=Icam1 PE=1 SV=1 - [ICAM1_MOUSE]	217678	147351	90924.7	87971.3	133426	118235	47533.5	132605	436094	120659	105789	125490	215464	180456	47533.5	185767	1	2	2	2	1	2	2	2
Q9CT10	14	14	559.36	0.499303	1.11322	wild type	PD-L1-KO	Ran-binding protein 3 OS=Mus musculus GN=Ranbp3 PE=1 SV=2 - [RANB3_MOUSE]	201863	186733	266814	196395	284555	112035	258977	109602	404410	152907	310432	280155	459516	170994	258977	153542	2	4	6	4	7	3	5	4
Q9QZM0	7	4	417.07	0.499589	1.15593	PD-L1-KO	wild type	Ubiquilin-2 OS=Mus musculus GN=Ubqln2 PE=1 SV=2 - [UBQL2_MOUSE]	121282	115672	114101	97008.7	153295	88579.7	169215	106841	242976	94719	132754	138382	247550	135195	169215	149673	1	1	1	0	2	0	1	0
Q9R0P4	4	4	266.19	0.500045	1.15791	PD-L1-KO	wild type	Small acidic protein OS=Mus musculus GN=Smap PE=1 SV=1 - [SMAP_MOUSE]	162044	170046	150346	224091	175196	267547	238153	137201	324638	139243	174924	319663	282917	408344	238153	192205	2	2	2	2	1	3	3	1
Q6PB93	4	3	276.27	0.500438	1.10106	wild type	PD-L1-KO	Polypeptide N-acetylgalactosaminyltransferase 2 OS=Mus musculus GN=Galnt2 PE=2 SV=1 - [GALT2_MOUSE]	256299	262880	259687	194791	212769	373366	162223	135932	513468	215261	302140	277867	343592	569851	162223	190427	1	1	3	2	1	1	2	3
Q61712	4	4	166.37	0.500979	1.17905	wild type	PD-L1-KO	DnaJ homolog subfamily C member 1 OS=Mus musculus GN=Dnajc1 PE=1 SV=1 - [DNJC1_MOUSE]	94467	91907.9	54939.3	50219.4	58460.7	52438	84145.3	52217.5	189254	75259.3	63920.6	71637.3	94405.8	80033.6	84145.3	73151.4	0	2	2	2	2	0	3	3
Q63844	2	1	44.58	0.501097	1.12884	wild type	PD-L1-KO	Mitogen-activated protein kinase 3 OS=Mus musculus GN=Mapk3 PE=1 SV=5 - [MK03_MOUSE]	23495.8	34955.1	32321.9	40723.6	29134.2	19319.4	35916.5	32118.4	47071.3	28623.2	37605.8	58091.7	47047.5	29486.4	35916.5	44994.7	0	0	0	0	1	0	0	0
Q99KK2	6	6	294.01	0.501467	1.11398	wild type	PD-L1-KO	N-acylneuraminate cytidylyltransferase OS=Mus musculus GN=Cmas PE=1 SV=2 - [NEUA_MOUSE]	224657	199247	142681	144407	160926	146249	190486	140585	450076	163154	166006	205995	259873	223213	190486	196945	1	1	2	1	4	1	2	2
Q5SQX6	5	4	184.4	0.501533	1.62342	wild type	PD-L1-KO	Cytoplasmic FMR1-interacting protein 2 OS=Mus musculus GN=Cyfip2 PE=1 SV=2 - [CYFP2_MOUSE]	30713.3	20316.6	59557.4	8244.6	32285.2	11626.7	16676.8	12609.7	61530.8	16636.4	69293.6	11760.8	52136	17745.3	16676.8	17664.9	0	0	3	1	2	1	1	1
Q9DBJ1	8	8	327.16	0.501678	1.16657	wild type	PD-L1-KO	Phosphoglycerate mutase 1 OS=Mus musculus GN=Pgam1 PE=1 SV=3 - [PGAM1_MOUSE]	339622	296964	428947	592576	491335	76601.6	493698	359718	680395	243171	499069	845301	793436	116913	493698	503929	2	0	3	3	6	0	3	1
Q8BRF7	3	3	162.52	0.501685	1.53074	PD-L1-KO	wild type	Sec1 family domain-containing protein 1 OS=Mus musculus GN=Scfd1 PE=2 SV=1 - [SCFD1_MOUSE]	74233.3	72281.7	78445.7	135351	47324.8	103182	131256	269781	148718	59188.3	91269.7	193076	76422.8	157481	131256	377936	0	0	0	0	1	0	1	1
Q9DCD0	4	4	205.37	0.501688	1.13896	wild type	PD-L1-KO	6-phosphogluconate dehydrogenase, decarboxylating OS=Mus musculus GN=Pgd PE=2 SV=3 - [6PGD_MOUSE]	475333	344537	354825	271063	261845	435661	404698	167162	952278	282126	412830	386667	422842	664928	404698	234177	2	3	4	2	3	0	3	2
Q91W90	11	11	509.65	0.501809	1.06968	wild type	PD-L1-KO	Thioredoxin domain-containing protein 5 OS=Mus musculus GN=Txndc5 PE=1 SV=2 - [TXND5_MOUSE]	798407	921541	675253	895277	685977	832439	857369	700342	1.59952e+06	754609	785640	1.2771e+06	1.10776e+06	1.27051e+06	857369	981109	4	4	4	7	5	2	6	4
Q8VDI1	6	6	216.65	0.50189	1.1377	PD-L1-KO	wild type	Epithelial-stromal interaction protein 1 OS=Mus musculus GN=Epsti1 PE=1 SV=2 - [ESIP1_MOUSE]	79432.9	96915.9	88368.6	94159.3	116810	68202.5	127779	95503.8	159135	79360.1	102815	134317	188631	104094	127779	133791	1	1	3	3	3	1	3	3
Q9QY76	6	4	236.82	0.502323	1.59058	wild type	PD-L1-KO	Vesicle-associated membrane protein-associated protein B OS=Mus musculus GN=Vapb PE=2 SV=3 - [VAPB_MOUSE]	242629	260870	76977.8	47500.7	80325.9	197792	67443.1	49250.8	486081	213615	89561.8	67759.2	129715	301880	67443.1	68995.4	2	0	2	1	2	0	1	1
Q6IFX2	19	4	890.73	0.502403	1.16771	wild type	PD-L1-KO	Keratin, type I cytoskeletal 42 OS=Mus musculus GN=Krt42 PE=1 SV=1 - [K1C42_MOUSE]	719515	376285	576264	316956	213842	222258	423554	843702	1.44147e+06	308123	670469	452134	345325	339222	423554	1.18194e+06	4	1	3	2	1	2	3	3
Q11136	1	1	57.01	0.502497	1.13036	wild type	PD-L1-KO	Xaa-Pro dipeptidase OS=Mus musculus GN=Pepd PE=2 SV=3 - [PEPD_MOUSE]	15068.8	12712.7	8846.07	10738.2	7222.63	12705.4	17055.9	4919.49	30188.7	10409.9	10292.2	15317.9	11663.5	19391.6	17055.9	6891.71	0	0	1	1	1	0	1	1
P23198	18	8	1126.28	0.503878	1.1223	PD-L1-KO	wild type	Chromobox protein homolog 3 OS=Mus musculus GN=Cbx3 PE=1 SV=2 - [CBX3_MOUSE]	5.11382e+06	5.45713e+06	3.76047e+06	5.94359e+06	4.76956e+06	6.8854e+06	6.73288e+06	4.36674e+06	1.0245e+07	4.4686e+06	4.37522e+06	8.47846e+06	7.70216e+06	1.05089e+07	6.73288e+06	6.11737e+06	17	14	12	16	12	16	16	11
Q7TQH0	6	5	248.81	0.504212	1.08996	wild type	PD-L1-KO	Ataxin-2-like protein OS=Mus musculus GN=Atxn2l PE=1 SV=1 - [ATX2L_MOUSE]	136509	151276	158173	111130	147775	93854.2	144023	125456	273481	123873	184031	158525	238635	143245	144023	175752	1	1	4	2	3	1	1	3
Q99J99	2	2	118.08	0.504297	1.20972	PD-L1-KO	wild type	3-mercaptopyruvate sulfurtransferase OS=Mus musculus GN=Mpst PE=1 SV=3 - [THTM_MOUSE]	10963	2195.72	2987.05	50808.5	13544.8	5163.64	50466.5	11821.3	21963.3	1797.98	3475.36	72477.7	21873	7881.02	50466.5	16560.4	0	0	0	2	1	0	1	1
Q8R1H0	1	1	60.79	0.504581	1.70935	PD-L1-KO	wild type	Homeodomain-only protein OS=Mus musculus GN=Hopx PE=1 SV=1 - [HOP_MOUSE]	305.353	10618.5	112158	0	205126	1493.02	910.878	2860.44	611.741	8694.98	130493	0	331249	2278.72	910.878	4007.19	0	0	1	0	1	0	0	0
Q80ZS3	1	1	40.07	0.504701	1.13914	wild type	PD-L1-KO	28S ribosomal protein S26, mitochondrial OS=Mus musculus GN=Mrps26 PE=2 SV=1 - [RT26_MOUSE]	38429.3	56365.2	68674.3	48388.3	60099.9	49716.7	47964.9	28198	76988.9	46154.9	79900.9	69025.3	97052.9	75880.3	47964.9	39502.5	0	0	0	1	1	1	1	0
Q8JZQ2	1	1	56.52	0.504972	1.14938	wild type	PD-L1-KO	AFG3-like protein 2 OS=Mus musculus GN=Afg3l2 PE=1 SV=1 - [AFG32_MOUSE]	20481.4	14805.2	22841.4	30578.9	12741.5	10192.7	34470.5	19773.5	41032.3	12123.3	26575.4	43620.4	20575.6	15556.7	34470.5	27700.6	0	0	0	1	0	0	0	1
P13020	5	4	237.64	0.505487	1.11037	wild type	PD-L1-KO	Gelsolin OS=Mus musculus GN=Gsn PE=1 SV=3 - [GELS_MOUSE]	162320	199193	234994	229389	211944	90602.8	308187	133067	325191	163111	273410	327220	342260	138283	308187	186413	1	1	1	1	2	0	4	1
Q3V3E1	1	1	28.94	0.505849	1.34409	PD-L1-KO	wild type	Ubiquitin-associated and SH3 domain-containing protein A OS=Mus musculus GN=Ubash3a PE=1 SV=1 - [UBS3A_MOUSE]	5159.35	2118.78	575.713	242.449	5217.15	3729.87	1296.91	638.22	10336.2	1734.97	669.828	345.85	8424.96	5692.73	1296.91	894.082	0	0	0	0	1	0	0	0
Q3U319	5	3	211.98	0.506344	1.08866	wild type	PD-L1-KO	E3 ubiquitin-protein ligase BRE1B OS=Mus musculus GN=Rnf40 PE=2 SV=2 - [BRE1B_MOUSE]	82824	88428.3	71231.1	95826.3	82722.1	108328	61469.9	58238.6	165929	72410	82875.7	136695	133584	165337	61469.9	81586.4	2	2	2	2	1	2	2	1
O54825	1	1	34.09	0.506673	1.16257	PD-L1-KO	wild type	Bystin OS=Mus musculus GN=Bysl PE=1 SV=3 - [BYST_MOUSE]	4407.71	6930.16	5752.17	5103.58	6616.94	9080.56	5803.79	4300.43	8830.37	5674.8	6692.51	7280.2	10685.4	13859.2	5803.79	6024.47	0	0	0	0	0	0	0	0
Q8VCF0	2	2	77.48	0.507307	1.3122	wild type	PD-L1-KO	Mitochondrial antiviral-signaling protein OS=Mus musculus GN=Mavs PE=1 SV=1 - [MAVS_MOUSE]	43036.1	47875.1	83801.4	131902	92177.6	50252.9	61699.5	29533.3	86218.1	39202.8	97500.9	188156	148854	76698.7	61699.5	41373.2	0	0	0	1	1	0	1	0
P97372	5	5	376.63	0.507862	1.07991	wild type	PD-L1-KO	Proteasome activator complex subunit 2 OS=Mus musculus GN=Psme2 PE=2 SV=4 - [PSME2_MOUSE]	1.02645e+06	636418	1.44207e+06	428979	2.05911e+06	213843	800457	198997	2.05639e+06	521134	1.67781e+06	611933	3.32518e+06	326379	800457	278775	2	1	2	0	1	0	3	0
Q9DBZ5	4	4	77.81	0.507923	1.13059	wild type	PD-L1-KO	Eukaryotic translation initiation factor 3 subunit K OS=Mus musculus GN=Eif3k PE=1 SV=1 - [EIF3K_MOUSE]	78483.6	64208.2	76306.2	49942.1	76085.1	68309.2	63180.6	30300.8	157233	52577.2	88780.4	71241.8	122867	104257	63180.6	42448.4	0	0	1	1	1	0	1	0
Q921E6	2	2	112.22	0.508007	1.23563	PD-L1-KO	wild type	Polycomb protein EED OS=Mus musculus GN=Eed PE=1 SV=1 - [EED_MOUSE]	19103.3	23850.3	41399	38980.3	50331.1	38071.4	44805.6	19186.3	38271.5	19530	48166.8	55604.9	81277.7	58106.5	44805.6	26878.1	0	0	2	2	1	2	2	1
Q9D1J3	11	11	616.96	0.508028	1.12698	wild type	PD-L1-KO	SAP domain-containing ribonucleoprotein OS=Mus musculus GN=Sarnp PE=1 SV=3 - [SARNP_MOUSE]	1.55891e+06	2.37023e+06	1.49806e+06	1.70423e+06	1.54047e+06	1.99689e+06	1.88659e+06	903938	3.1231e+06	1.94088e+06	1.74296e+06	2.43107e+06	2.48765e+06	3.04777e+06	1.88659e+06	1.26633e+06	9	8	7	9	7	10	9	6
P35564	12	12	382.07	0.50807	1.05864	PD-L1-KO	wild type	Calnexin OS=Mus musculus GN=Canx PE=1 SV=1 - [CALX_MOUSE]	2.37975e+06	2.97638e+06	2.69208e+06	2.63002e+06	3.09431e+06	2.48575e+06	3.15919e+06	2.56515e+06	4.76758e+06	2.43722e+06	3.13217e+06	3.75169e+06	4.99687e+06	3.79388e+06	3.15919e+06	3.59352e+06	7	5	8	5	9	7	6	4
P52432	1	1	27.08	0.508344	1.19713	wild type	PD-L1-KO	DNA-directed RNA polymerases I and III subunit RPAC1 OS=Mus musculus GN=Polr1c PE=1 SV=3 - [RPAC1_MOUSE]	0	0	7480.27	6476.97	10620.9	60.6449	879.469	97.9362	0	0	8703.11	9239.31	17151.3	92.5594	879.469	137.199	0	0	0	0	0	0	0	0
Q9JM14	4	4	172.26	0.509784	1.08444	PD-L1-KO	wild type	5'(3')-deoxyribonucleotidase, cytosolic type OS=Mus musculus GN=Nt5c PE=1 SV=1 - [NT5C_MOUSE]	379962	503648	298215	357574	354148	430948	495417	388870	761212	412415	346965	510075	571898	657735	495417	544768	1	2	3	2	4	3	2	2
Q9QUR7	3	3	187.19	0.512229	1.02506	wild type	PD-L1-KO	Peptidyl-prolyl cis-trans isomerase NIMA-interacting 1 OS=Mus musculus GN=Pin1 PE=1 SV=1 - [PIN1_MOUSE]	174359	134312	88653.8	104094	91526.4	254806	134764	8063.49	349309	109982	103146	148489	147802	388898	134764	11296.1	1	1	1	1	1	2	1	0
P70429	4	3	178.1	0.512678	1.18058	wild type	PD-L1-KO	Ena/VASP-like protein OS=Mus musculus GN=Evl PE=1 SV=2 - [EVL_MOUSE]	59569.7	41172.5	96372.7	21814.3	74583.5	2720.94	76646.2	31491.9	119341	33714.3	112127	31117.9	120442	4152.84	76646.2	44117	1	1	2	0	3	0	1	0
O55143	25	14	1457.33	0.51293	1.07854	wild type	PD-L1-KO	Sarcoplasmic/endoplasmic reticulum calcium ATPase 2 OS=Mus musculus GN=Atp2a2 PE=1 SV=2 - [AT2A2_MOUSE]	1.0219e+06	1.06763e+06	877779	1.04731e+06	946710	1.14595e+06	1.00871e+06	620885	2.04727e+06	874231	1.02127e+06	1.49398e+06	1.5288e+06	1.74901e+06	1.00871e+06	869797	5	6	10	7	10	4	6	3
Q6NZJ6	4	4	154.05	0.513102	1.15051	PD-L1-KO	wild type	Eukaryotic translation initiation factor 4 gamma 1 OS=Mus musculus GN=Eif4g1 PE=1 SV=1 - [IF4G1_MOUSE]	40525.4	64647.8	136974	74158.5	107214	56017.3	94954.7	105726	81188.3	52937.2	159365	105786	173135	85496.6	94954.7	148112	0	0	3	1	2	0	2	1
Q9CQ49	1	1	36.64	0.513342	1.80475	PD-L1-KO	wild type	Nuclear cap-binding protein subunit 2 OS=Mus musculus GN=Ncbp2 PE=1 SV=1 - [NCBP2_MOUSE]	2742.13	4790.96	0	6393.68	424.717	20718.8	2275.53	1715.19	5493.55	3923.11	0	9120.51	685.858	31622.2	2275.53	2402.81	0	0	0	0	0	1	0	0
Q05CL8	4	4	279.34	0.513789	1.08262	wild type	PD-L1-KO	La-related protein 7 OS=Mus musculus GN=Larp7 PE=1 SV=2 - [LARP7_MOUSE]	188688	234655	188720	161872	161895	217662	192410	142904	378015	192148	219571	230909	261438	332207	192410	200194	1	2	2	3	1	1	2	3
Q9WUM3	12	12	510.64	0.514009	1.12802	wild type	PD-L1-KO	Coronin-1B OS=Mus musculus GN=Coro1b PE=1 SV=1 - [COR1B_MOUSE]	1.62492e+06	2.17603e+06	1.47594e+06	2.3543e+06	1.60962e+06	2.60369e+06	1.64775e+06	904061	3.25535e+06	1.78185e+06	1.71722e+06	3.35838e+06	2.59931e+06	3.97389e+06	1.64775e+06	1.2665e+06	2	3	7	4	4	4	3	1
Q6PAM1	1	1	60.18	0.514794	1.21645	wild type	PD-L1-KO	Alpha-taxilin OS=Mus musculus GN=Txlna PE=2 SV=1 - [TXLNA_MOUSE]	65060.3	79112	45096.3	128169	46289.5	120467	60590.6	33606.9	130341	64781.3	52468.5	182832	74750.9	183863	60590.6	47079.9	0	1	1	1	1	0	1	1
Q5NBU8	1	1	27.98	0.515286	1.30613	wild type	PD-L1-KO	XIAP-associated factor 1 OS=Mus musculus GN=Xaf1 PE=2 SV=3 - [XAF1_MOUSE]	1128.33	1480.5	14975.5	208.25	11756.1	1626.78	230.47	9.00582	2260.49	1212.32	17423.6	297.067	18984.4	2482.88	230.47	12.6162	0	0	0	0	0	0	0	0
Q8BH95	6	4	313.78	0.515622	1.16057	PD-L1-KO	wild type	Enoyl-CoA hydratase, mitochondrial OS=Mus musculus GN=Echs1 PE=1 SV=1 - [ECHM_MOUSE]	57788.7	88652.2	276874	149517	212569	97179.5	216089	138976	115773	72593.3	322136	213285	343269	148321	216089	194691	0	0	2	3	1	0	2	3
Q8VEM8	8	8	329.58	0.515635	1.09159	wild type	PD-L1-KO	Phosphate carrier protein, mitochondrial OS=Mus musculus GN=Slc25a3 PE=1 SV=1 - [MPCP_MOUSE]	3.864e+06	3.96932e+06	3.4303e+06	3.80788e+06	3.75407e+06	4.87878e+06	3.35271e+06	1.82139e+06	7.7411e+06	3.2503e+06	3.99107e+06	5.43189e+06	6.06229e+06	7.44625e+06	3.35271e+06	2.55158e+06	6	2	6	3	5	3	4	5
Q61249	2	2	109.6	0.51566	1.35988	PD-L1-KO	wild type	Immunoglobulin-binding protein 1 OS=Mus musculus GN=Igbp1 PE=1 SV=1 - [IGBP1_MOUSE]	49751	81338	49201.8	64606.8	94960.4	92122.8	114940	31007.8	99670.7	66604.1	57245.1	92160.7	153348	140603	114940	43438.8	1	1	0	1	2	1	1	0
Q9JHW2	2	2	101.46	0.516128	1.04578	wild type	PD-L1-KO	Omega-amidase NIT2 OS=Mus musculus GN=Nit2 PE=1 SV=1 - [NIT2_MOUSE]	24277.2	45737.1	18679	40879.7	14983	67667.2	38073.3	3177.55	48636.7	37452.1	21732.5	58314.4	24195.5	103277	38073.3	4451.43	1	1	1	1	0	1	1	0
Q91YJ5	3	3	108.53	0.516712	1.08795	wild type	PD-L1-KO	Translation initiation factor IF-2, mitochondrial OS=Mus musculus GN=Mtif2 PE=1 SV=2 - [IF2M_MOUSE]	14304.9	17942.9	19906.5	14443.8	23420	7178.77	23742.1	6873.26	28658.3	14692.7	23160.8	20603.9	37820.1	10956.6	23742.1	9628.74	1	1	1	1	1	0	2	0
Q9JI44	1	1	20.58	0.51712	1.51376	PD-L1-KO	wild type	DNA methyltransferase 1-associated protein 1 OS=Mus musculus GN=Dmap1 PE=1 SV=1 - [DMAP1_MOUSE]	433.275	1520.78	7449.74	4367.34	8337.62	1367.11	9302.4	1839.02	868.019	1245.3	8667.59	6229.96	13464.1	2086.55	9302.4	2576.28	0	0	0	0	0	0	0	0
Q9EPE9	6	5	241.13	0.51796	1.11145	wild type	PD-L1-KO	Probable cation-transporting ATPase 13A1 OS=Mus musculus GN=Atp13a1 PE=1 SV=2 - [AT131_MOUSE]	148988	147778	109774	165456	187661	68958.2	143315	114706	298482	121009	127719	236021	303047	105248	143315	160691	1	1	3	0	3	2	0	3
Q5XJE5	3	3	135.02	0.518959	1.11249	wild type	PD-L1-KO	RNA polymerase-associated protein LEO1 OS=Mus musculus GN=Leo1 PE=1 SV=2 - [LEO1_MOUSE]	159061	160532	109004	170078	134941	84761.2	208691	109744	318661	131452	126824	242614	217911	129367	208691	153741	0	1	1	2	2	2	3	0
Q9DBU6	1	1	28.59	0.519441	1.69874	PD-L1-KO	wild type	Serine/Arginine-related protein 53 OS=Mus musculus GN=Rsrc1 PE=1 SV=1 - [RSRC1_MOUSE]	732.752	1265.35	9806.07	574.995	9196.55	9951.85	1265.74	614.839	1467.99	1036.14	11409.1	820.224	14851.1	15189	1265.74	861.328	0	0	0	0	1	0	0	0
Q99N96	1	1	80.53	0.519597	1.16163	wild type	PD-L1-KO	39S ribosomal protein L1, mitochondrial OS=Mus musculus GN=Mrpl1 PE=1 SV=2 - [RM01_MOUSE]	31271.6	34987.6	18857.9	20552.7	26647.1	25844.8	32222.5	6252.66	62649.3	28649.8	21940.7	29318.2	43031.3	39445.7	32222.5	8759.35	1	0	1	1	0	1	1	0
Q921H8	16	16	1055.53	0.519743	1.09477	wild type	PD-L1-KO	3-ketoacyl-CoA thiolase A, peroxisomal OS=Mus musculus GN=Acaa1a PE=2 SV=1 - [THIKA_MOUSE]	1.39417e+06	1.60838e+06	1.17675e+06	1.26592e+06	1.61089e+06	1.28937e+06	1.31665e+06	756946	2.79306e+06	1.31703e+06	1.36912e+06	1.80582e+06	2.60137e+06	1.9679e+06	1.31665e+06	1.06041e+06	8	8	10	6	10	6	10	3
O88696	2	2	69.44	0.519825	2.25266	wild type	PD-L1-KO	Putative ATP-dependent Clp protease proteolytic subunit, mitochondrial OS=Mus musculus GN=Clpp PE=2 SV=1 - [CLPP_MOUSE]	898.819	25770.7	29399.3	131309	43489.7	1742.84	37489.5	458.298	1800.69	21102.4	34205.3	187310	70229.7	2660.01	37489.5	642.03	0	0	0	1	1	0	0	0
P98083	3	3	123.95	0.519858	1.081	wild type	PD-L1-KO	SHC-transforming protein 1 OS=Mus musculus GN=Shc1 PE=1 SV=3 - [SHC1_MOUSE]	67380.9	75029.7	56945.1	88681.8	68102.8	125469	59585.2	13298	134990	61438.5	66254.2	126503	109976	191498	59585.2	18629.2	1	1	2	3	2	1	2	1
Q3TSG4	1	1	30.28	0.520388	1.14947	wild type	PD-L1-KO	RNA demethylase ALKBH5 OS=Mus musculus GN=Alkbh5 PE=1 SV=2 - [ALKB5_MOUSE]	22362.2	31387.1	41176.3	41181.9	20536.6	38030.5	41355.4	18486.7	44800.2	25701.5	47907.7	58745.5	33163.8	58044.1	41355.4	25898	1	0	0	1	1	0	1	0
Q9D211	1	1	58.2	0.520482	1.21071	PD-L1-KO	wild type	CDKN2AIP N-terminal-like protein OS=Mus musculus GN=Cdkn2aipnl PE=2 SV=1 - [C2AIL_MOUSE]	25671.3	23473.8	24715.9	17554.3	29237.3	15829.4	40681.7	24929.4	51429.6	19221.7	28756.4	25041	47214.1	24159.7	40681.7	34923.5	0	0	1	0	1	0	0	1
P35700	33	32	1415.05	0.521054	1.06879	wild type	PD-L1-KO	Peroxiredoxin-1 OS=Mus musculus GN=Prdx1 PE=1 SV=1 - [PRDX1_MOUSE]	3.11036e+06	3.51696e+06	3.53676e+06	3.04333e+06	3.26458e+06	2.27506e+06	3.98681e+06	2.83091e+06	6.23126e+06	2.87988e+06	4.11493e+06	4.34127e+06	5.27183e+06	3.47231e+06	3.98681e+06	3.96582e+06	18	15	19	14	18	9	14	12
Q9CR09	1	1	54.15	0.52231	1.11877	wild type	PD-L1-KO	Ubiquitin-fold modifier-conjugating enzyme 1 OS=Mus musculus GN=Ufc1 PE=2 SV=1 - [UFC1_MOUSE]	46279.8	64346.6	41046.7	65626.1	45034.3	68005.2	42117	39074.3	92716.6	52690.5	47756.8	93614.8	72724	103793	42117	54739.1	1	0	1	1	0	0	1	1
Q9CSH3	2	1	79.72	0.522462	1.19377	wild type	PD-L1-KO	Exosome complex exonuclease RRP44 OS=Mus musculus GN=Dis3 PE=2 SV=4 - [RRP44_MOUSE]	7094.37	4861.82	3621.94	9187.62	8359.23	3642.49	6874.98	1869.11	14212.8	3981.13	4214.04	13106	13499	5559.36	6874.98	2618.43	0	0	0	0	0	0	1	0
Q4VAA2	4	4	211.47	0.522751	1.08941	wild type	PD-L1-KO	Protein CDV3 OS=Mus musculus GN=Cdv3 PE=1 SV=2 - [CDV3_MOUSE]	566437	636257	527303	597139	507873	814610	536694	276974	1.1348e+06	521003	613504	851811	820143	1.2433e+06	536694	388012	5	2	2	3	2	5	3	1
P38060	5	5	215.62	0.52305	1.22775	wild type	PD-L1-KO	Hydroxymethylglutaryl-CoA lyase, mitochondrial OS=Mus musculus GN=Hmgcl PE=1 SV=2 - [HMGCL_MOUSE]	214588	112030	82052	67727.2	149129	45465.2	158395	35036.3	429903	91736.1	95465.5	96612	240823	69391.4	158395	49082.3	3	1	2	0	3	0	1	0
Q8BHD7	6	3	245.2	0.523059	1.26644	PD-L1-KO	wild type	Polypyrimidine tract-binding protein 3 OS=Mus musculus GN=Ptbp3 PE=2 SV=1 - [PTBP3_MOUSE]	23801.6	47663.6	95713.9	113497	138940	114717	52933	48871.5	47684	39029.6	111361	161902	224368	175086	52933	68464	0	0	1	0	2	2	0	0
Q91VJ4	2	2	70.6	0.523068	1.00694	wild type	PD-L1-KO	Serine/threonine-protein kinase 38 OS=Mus musculus GN=Stk38 PE=1 SV=1 - [STK38_MOUSE]	21390.5	26335.3	13629.1	14367.4	32509.7	1821.36	32295.1	8574.36	42853.6	21564.8	15857.1	20494.9	52498.5	2779.85	32295.1	12011.8	1	0	0	0	1	0	1	0
Q9JLQ2	4	4	163.31	0.52372	1.59517	wild type	PD-L1-KO	ARF GTPase-activating protein GIT2 OS=Mus musculus GN=Git2 PE=1 SV=2 - [GIT2_MOUSE]	15436.3	11287.7	54985.2	13733	14930.7	16015.3	16156.4	12729.5	30924.9	9243	63974	19589.9	24111	24443.5	16156.4	17832.7	0	0	3	1	2	0	0	1
Q80VA0	2	1	57.19	0.524181	1.22079	wild type	PD-L1-KO	N-acetylgalactosaminyltransferase 7 OS=Mus musculus GN=Galnt7 PE=2 SV=2 - [GALT7_MOUSE]	40446.9	34866.7	16084.2	35471.9	29804.1	21854.4	20549.7	31715.8	81031	28550.8	18713.6	50600.2	48129.4	33355.4	20549.7	44430.6	1	0	1	0	1	0	1	0
P22227	2	2	100.45	0.524239	1.0655	PD-L1-KO	wild type	Zinc finger protein 42 OS=Mus musculus GN=Zfp42 PE=1 SV=1 - [ZFP42_MOUSE]	54131.3	62553.4	57386.1	56038	59505.6	54558.8	75851.3	55265.5	108446	51222.2	66767.4	79937.5	96093.1	83270.5	75851.3	77421.4	0	0	1	1	1	1	1	1
P62204	18	18	1110.42	0.524624	1.14772	wild type	PD-L1-KO	Calmodulin OS=Mus musculus GN=Calm1 PE=1 SV=2 - [CALM_MOUSE]	1.48365e+07	1.41407e+07	1.24657e+07	7.85164e+06	9.93253e+06	1.08003e+07	1.58877e+07	6.32944e+06	2.97232e+07	1.15792e+07	1.45035e+07	1.12003e+07	1.60396e+07	1.6484e+07	1.58877e+07	8.86691e+06	27	20	20	11	15	21	17	8
Q8BWY3	9	9	252.84	0.524763	1.16388	wild type	PD-L1-KO	Eukaryotic peptide chain release factor subunit 1 OS=Mus musculus GN=Etf1 PE=1 SV=4 - [ERF1_MOUSE]	310972	243223	310308	157426	319877	124245	211256	222659	622999	199165	361036	224567	516556	189629	211256	311923	2	1	3	1	1	0	1	4
P08920	1	1	25.05	0.5248	1.16866	PD-L1-KO	wild type	T-cell surface antigen CD2 OS=Mus musculus GN=Cd2 PE=1 SV=1 - [CD2_MOUSE]	5011.7	12026.8	21045.7	9458.03	18734.5	8002.93	12981.2	15841.9	10040.4	9848.25	24486.2	13491.8	30253.6	12214.5	12981.2	22192.9	0	0	1	0	0	0	0	0
Q8BGB5	1	1	25.81	0.524922	2.18697	PD-L1-KO	wild type	LIM domain-containing protein 2 OS=Mus musculus GN=Limd2 PE=2 SV=1 - [LIMD2_MOUSE]	367.722	6814.93	108.03	76.4349	0	15968.8	96.3947	46.4838	736.692	5580.45	125.691	109.033	0	24372.4	96.3947	65.1191	0	0	0	0	0	1	0	0
Q99JX4	1	1	32.35	0.525386	1.05229	wild type	PD-L1-KO	Eukaryotic translation initiation factor 3 subunit M OS=Mus musculus GN=Eif3m PE=2 SV=1 - [EIF3M_MOUSE]	35388	30507.3	11737.2	16746.9	3638.89	50652.6	28789.1	6609.11	70896	24981	13656	23889.3	5876.29	77308.7	28789.1	9258.7	0	0	0	0	0	1	0	0
Q62348	4	4	205.88	0.526008	1.10855	wild type	PD-L1-KO	Translin OS=Mus musculus GN=Tsn PE=1 SV=1 - [TSN_MOUSE]	172713	154488	170952	116803	162167	111526	209987	71058.3	346012	126503	198898	166618	261876	170216	209987	99545.5	1	0	1	1	2	0	1	1
Q7TQ95	2	1	54.01	0.526722	1.07771	PD-L1-KO	wild type	Protein lunapark OS=Mus musculus GN=Lnp PE=1 SV=1 - [LNP_MOUSE]	8356.56	7028.5	34202.2	34391.3	26683.5	14577.2	25738	23505.8	16741.5	5755.33	39793.5	49058.8	43090	22248.5	25738	32929.3	0	0	1	0	0	0	0	0
[truncated: 1,381 more rows]
