# Supplementary material for: The PD-1/PD-L1 Pathway Affects the Expansion and Function of Cytotoxic CD8+ T Cells During an Acute Retroviral Infection
Source: Front Immunol. 2019 Feb 5;10:54. doi: 10.3389/fimmu.2019.00054 (PMC6370637; doi:10.3389/fimmu.2019.00054)
Supplement: Supplementary file 2 [file Table_2.xlsx]

## Sheet: Table 2
Table 2	Overview of significantly 1.5 fold regulated proteins
Accession	Peptide count	Unique peptides	Confidence score	Anova (p)	Max fold change	Highest mean condition	Lowest mean condition	Ratio PD-L1-KO/wt	Ratio (log2)	ANOVA (-log10)	Description
Q9D0D5	1	1	59.08	0.019972	178.005	PD-L1-KO	wild type	178.005	7.47578	1.69958	General transcription factor IIE subunit 1 OS=Mus musculus GN=Gtf2e1 PE=2 SV=1 - [T2EA_MOUSE]
Q9R0G6	1	1	30.6	0.0281822	33.2201	wild type	PD-L1-KO	0.0301023	-5.05398	1.55003	Cartilage oligomeric matrix protein OS=Mus musculus GN=Comp PE=1 SV=2 - [COMP_MOUSE]
Q640M1	1	1	22.48	0.0359895	27.4919	PD-L1-KO	wild type	27.4919	4.78093	1.44382	U3 small nucleolar RNA-associated protein 14 homolog A OS=Mus musculus GN=Utp14a PE=2 SV=1 - [UT14A_MOUSE]
O08677	2	2	53.28	0.0162559	19.2868	wild type	PD-L1-KO	0.0518488	-4.26954	1.78899	Kininogen-1 OS=Mus musculus GN=Kng1 PE=1 SV=1 - [KNG1_MOUSE]
Q02357	2	2	67.48	0.0259641	9.58103	wild type	PD-L1-KO	0.104373	-3.26018	1.58563	Ankyrin-1 OS=Mus musculus GN=Ank1 PE=1 SV=2 - [ANK1_MOUSE]
Q61703	4	4	201.52	0.0148487	7.44383	wild type	PD-L1-KO	0.134339	-2.89605	1.82831	Inter-alpha-trypsin inhibitor heavy chain H2 OS=Mus musculus GN=Itih2 PE=1 SV=1 - [ITIH2_MOUSE]
Q8R1Z9	1	1	40.9	0.0396362	6.76512	wild type	PD-L1-KO	0.147817	-2.75812	1.40191	RING finger protein 121 OS=Mus musculus GN=Rnf121 PE=2 SV=1 - [RN121_MOUSE]
Q8BRT1	1	1	73.01	0.0262321	5.22598	wild type	PD-L1-KO	0.191352	-2.3857	1.58117	CLIP-associating protein 2 OS=Mus musculus GN=Clasp2 PE=1 SV=1 - [CLAP2_MOUSE]
Q99ME9	4	4	129.49	0.0473085	4.58408	wild type	PD-L1-KO	0.218146	-2.19663	1.32506	Nucleolar GTP-binding protein 1 OS=Mus musculus GN=Gtpbp4 PE=2 SV=3 - [NOG1_MOUSE]
Q8C5L3	1	1	58.38	0.0168401	4.4033	wild type	PD-L1-KO	0.227102	-2.13858	1.77365	CCR4-NOT transcription complex subunit 2 OS=Mus musculus GN=Cnot2 PE=2 SV=2 - [CNOT2_MOUSE]
P50446	18	4	994.26	0.0116355	4.20364	wild type	PD-L1-KO	0.237889	-2.07164	1.93421	Keratin, type II cytoskeletal 6A OS=Mus musculus GN=Krt6a PE=2 SV=3 - [K2C6A_MOUSE]
P04919	7	7	279.18	0.0154259	3.92306	wild type	PD-L1-KO	0.254903	-1.97198	1.81175	Band 3 anion transport protein OS=Mus musculus GN=Slc4a1 PE=1 SV=1 - [B3AT_MOUSE]
P01942	20	20	890.68	0.0334335	3.66338	wild type	PD-L1-KO	0.272972	-1.87317	1.47582	Hemoglobin subunit alpha OS=Mus musculus GN=Hba PE=1 SV=2 - [HBA_MOUSE]
Q8K183	1	1	27.33	0.0467461	3.46124	PD-L1-KO	wild type	3.46124	1.79129	1.33025	Pyridoxal kinase OS=Mus musculus GN=Pdxk PE=1 SV=1 - [PDXK_MOUSE]
P00920	3	3	88.35	0.0197645	3.40897	wild type	PD-L1-KO	0.293344	-1.76934	1.70412	Carbonic anhydrase 2 OS=Mus musculus GN=Ca2 PE=1 SV=4 - [CAH2_MOUSE]
Q9CXR1	1	1	38.43	0.0253266	3.15508	wild type	PD-L1-KO	0.31695	-1.65767	1.59642	Dehydrogenase/reductase SDR family member 7 OS=Mus musculus GN=Dhrs7 PE=2 SV=2 - [DHRS7_MOUSE]
Q9CX00	2	2	59.18	0.0470066	2.54973	wild type	PD-L1-KO	0.392198	-1.35035	1.32784	IST1 homolog OS=Mus musculus GN=Ist1 PE=2 SV=1 - [IST1_MOUSE]
Q9Z1W9	3	3	187.27	0.0270785	2.28975	wild type	PD-L1-KO	0.436729	-1.19519	1.56738	STE20/SPS1-related proline-alanine-rich protein kinase OS=Mus musculus GN=Stk39 PE=1 SV=1 - [STK39_MOUSE]
Q921G6	2	2	69.76	0.0324333	2.1597	wild type	PD-L1-KO	0.463027	-1.11083	1.48901	Leucine-rich repeat and calponin homology domain-containing protein 4 OS=Mus musculus GN=Lrch4 PE=2 SV=1 - [LRCH4_MOUSE]
Q61093	4	4	213.93	0.0345155	2.12058	wild type	PD-L1-KO	0.471569	-1.08446	1.46199	Cytochrome b-245 heavy chain OS=Mus musculus GN=Cybb PE=2 SV=1 - [CY24B_MOUSE]
Q64735	5	5	220.3	0.0446664	2.09856	wild type	PD-L1-KO	0.476518	-1.0694	1.35002	Complement component receptor 1-like protein OS=Mus musculus GN=Cr1l PE=1 SV=1 - [CR1L_MOUSE]
P12815	1	1	55.16	0.0420743	2.07867	wild type	PD-L1-KO	0.481077	-1.05566	1.37598	Programmed cell death protein 6 OS=Mus musculus GN=Pdcd6 PE=1 SV=2 - [PDCD6_MOUSE]
Q99N50	4	4	124.49	0.0302757	2.04835	wild type	PD-L1-KO	0.488198	-1.03446	1.51891	Synaptotagmin-like protein 2 OS=Mus musculus GN=Sytl2 PE=1 SV=2 - [SYTL2_MOUSE]
Q69ZK0	9	9	467.1	0.00474385	1.90797	wild type	PD-L1-KO	0.524118	-0.932038	2.32387	Phosphatidylinositol 3,4,5-trisphosphate-dependent Rac exchanger 1 protein OS=Mus musculus GN=Prex1 PE=1 SV=2 - [PREX1_MOUSE]
O08810	28	26	1520.34	0.0379363	1.8544	wild type	PD-L1-KO	0.539258	-0.890953	1.42094	116 kDa U5 small nuclear ribonucleoprotein component OS=Mus musculus GN=Eftud2 PE=2 SV=1 - [U5S1_MOUSE]
Q8BL66	9	7	476.29	0.0226081	1.74026	wild type	PD-L1-KO	0.574627	-0.799302	1.64574	Early endosome antigen 1 OS=Mus musculus GN=Eea1 PE=1 SV=2 - [EEA1_MOUSE]
Q3UIR3	8	8	313.51	0.0123512	1.71363	wild type	PD-L1-KO	0.583558	-0.777052	1.90829	E3 ubiquitin-protein ligase DTX3L OS=Mus musculus GN=Dtx3l PE=2 SV=1 - [DTX3L_MOUSE]
P49442	4	3	251.23	0.0324116	1.71348	wild type	PD-L1-KO	0.583607	-0.776932	1.4893	Inositol polyphosphate 1-phosphatase OS=Mus musculus GN=Inpp1 PE=1 SV=2 - [INPP_MOUSE]
Q8VDQ8	1	1	76.32	0.0421319	1.713	wild type	PD-L1-KO	0.583771	-0.776526	1.37539	NAD-dependent protein deacetylase sirtuin-2 OS=Mus musculus GN=Sirt2 PE=1 SV=2 - [SIR2_MOUSE]
Q75N62	4	4	160.46	0.00189953	1.6696	wild type	PD-L1-KO	0.598946	-0.739502	2.72135	GTPase IMAP family member 8 OS=Mus musculus GN=Gimap8 PE=2 SV=1 - [GIMA8_MOUSE]
Q3TDQ1	2	1	92.62	0.02706	1.60733	wild type	PD-L1-KO	0.622151	-0.684663	1.56767	Dolichyl-diphosphooligosaccharide--protein glycosyltransferase subunit STT3B OS=Mus musculus GN=Stt3b PE=1 SV=2 - [STT3B_MOUSE]
Q3UN02	2	2	146.38	0.00810836	1.60661	wild type	PD-L1-KO	0.622428	-0.684021	2.09107	Lysocardiolipin acyltransferase 1 OS=Mus musculus GN=Lclat1 PE=2 SV=2 - [LCLT1_MOUSE]
Q8BYY4	2	2	103.29	0.0256093	1.56426	wild type	PD-L1-KO	0.639278	-0.645485	1.5916	Tetratricopeptide repeat protein 39B OS=Mus musculus GN=Ttc39b PE=1 SV=1 - [TT39B_MOUSE]
P84099	2	2	125.6	0.0418183	1.55885	wild type	PD-L1-KO	0.641499	-0.640482	1.37863	60S ribosomal protein L19 OS=Mus musculus GN=Rpl19 PE=1 SV=1 - [RL19_MOUSE]
P55772	3	3	134.52	0.0328206	1.54987	wild type	PD-L1-KO	0.645215	-0.632147	1.48385	Ectonucleoside triphosphate diphosphohydrolase 1 OS=Mus musculus GN=Entpd1 PE=2 SV=1 - [ENTP1_MOUSE]
B2RUP2	1	1	64.4	0.0187683	1.54861	wild type	PD-L1-KO	0.645739	-0.630977	1.72658	Protein unc-13 homolog D OS=Mus musculus GN=Unc13d PE=1 SV=2 - [UN13D_MOUSE]
P47911	7	6	419.94	0.00771369	1.53847	wild type	PD-L1-KO	0.649996	-0.621497	2.11274	60S ribosomal protein L6 OS=Mus musculus GN=Rpl6 PE=1 SV=3 - [RL6_MOUSE]
B2RXR6	7	7	449.98	0.0472448	1.53714	wild type	PD-L1-KO	0.65056	-0.620246	1.32565	Serine/threonine-protein phosphatase 6 regulatory ankyrin repeat subunit B OS=Mus musculus GN=Ankrd44 PE=2 SV=1 - [ANR44_MOUSE]
Q505F5	9	9	366.02	0.0174288	1.51007	wild type	PD-L1-KO	0.662223	-0.594611	1.75873	Leucine-rich repeat-containing protein 47 OS=Mus musculus GN=Lrrc47 PE=1 SV=1 - [LRC47_MOUSE]
P70677	14	14	588.98	0.0389789	1.50188	wild type	PD-L1-KO	0.665831	-0.586772	1.40917	Caspase-3 OS=Mus musculus GN=Casp3 PE=1 SV=1 - [CASP3_MOUSE]
